# Supplementary material
Source: PubMed Central journal article supplement (PMC6439561)
Supplement: jamaoncol-5-e184475-s001.pdf [file jamaoncol-5-e184475-s001.pdf]

## Supplementary Online Content

Juric D, Janku F, Rodón J, et al. Alpelisib plus fulvestrant in *PIK3CA*-altered and *PIK3CA*-wild-type estrogen receptor–positive advanced breast cancer: a phase 1b clinical trial. *JAMA Oncol*. Published online December 13, 2018. doi:10.1001/jamaoncol.2018.4475

### **eMethods.** Further Methods

**eFigure 1.** Concentration–Time Profiles of Alpelisib 300–400 mg QD Plus Fulvestrant During Cycle 1

**eFigure 2.** Strip Plots of Alpelisib Exposure (300–400 mg QD) At Steady State (Cycle 1, Day 8) As Single Agent And In Combination With Fulvestrant

**eFigure 3.** Maximum Fold Change of (A) Maximum C-Peptide (nmol/L), (B) Maximum Insulin (pmol/L), and (C) Maximum Glucose (mmol/L) From Baseline During the First 28 Days by Treatment

**eFigure 4.** Swimmers Plots of Duration of Exposure and Overall Response (per RECIST v1.0) in Patients With (A) *PIK3CA*-Altered, (B) *PIK3CA*-UNK, or (C) *PIK3CA*-Wild-Type ER+ LA/MBC

**eFigure 5.** Most Frequent Somatic Genetic Alterations Observed in Tumor Samples With Known/Likely Functional Significance

**eTable 1.** Recruitment Sites

**eTable 2.** Summary of Pharmacokinetic Parameters for Alpelisib by Cohort (300–400-mg QD) as a Single Agent and in Combination With Fulvestrant

**eTable 3.** Summary of Best Overall Response to Alpelisib (300–400-mg QD) Plus Fulvestrant per RECIST v1.0 in Patients with ER+, HER2– Advanced Breast Cancer with *PIK3CA*-Altered or *PIK3CA*-Wild-Type Tumors

**eTable 4.** Duration of Exposure to Alpelisib 300–400 mg QD Plus Fulvestrant in Patients with ER+ ABC by *PIK3CA* Status and mTOR Pretreatment

**eTable 5.** NGS Data by Patients Who Received Alpelisib in Combination With Fulvestrant: *PIK3CA* Mutation

**eTable 6.** NGS Data Collected at Screening (by Patients who Received Alpelisib Plus Fulvestrant) – Mutations of Known Significance

**eTable 7.** NGS Data Collected at Screening (by Patients Who Received Alpelisib Plus Fulvestrant) – Mutations of Unknown Significance

This supplementary material has been provided by the authors to give readers additional information about their work.

## **eMethods. Further Methods**

### **Eligibility criteria**

Additional inclusion criteria included disease progression during or after anti-estrogen therapy or relapse after adjuvant anti-estrogen therapy; at least one measurable or non-measurable lesion per Response Evaluation Criteria In Solid Tumors (RECIST) v1.0; and an Eastern Cooperative Oncology Group performance status  $\leq 2$ . Exclusion criteria included clinical manifestations of diabetes mellitus (fasting glucose  $\geq 140$  mg/dL [7.8 mmol/L]); history of gestational or documented steroid-induced diabetes mellitus; brain metastasis, unless treated and asymptomatic without corticosteroid therapy; prior treatment with a PI3K, AKT, or mTOR inhibitor without clinical benefit; impaired cardiac function, clinically significant cardiac disease, or concurrent medication with known risk of QT prolongation or torsades de pointes.

### **Alpelisib administration**

Patients were instructed to take their daily dose of alpelisib at approximately the same time each morning. For days when blood collection was scheduled at the clinic, patients took their daily dose at the clinic.

Patients took alpelisib one hour after a light breakfast (e.g. consisting of juice, toast, and jam) and continued fasting for 1 hour after each dose. If the patient forgot to take their daily dose of alpelisib by 12 noon, then the dose was withheld that day. If, for any reason, breakfast was missed, then the daily dose of alpelisib was taken with a glass of water at the scheduled time.

Patients undergoing a dose reduction initiated treatment at the preceding dose level in the dose escalation part of the study. In the dose expansion part, dose reductions could be by 25% or to the next lower dose level, according to investigator judgement. Only two dose reductions per patient were permitted. For example, patients could dose-reduce alpelisib from 400mg to 300mg to 200mg, or patients starting at 300mg or 350mg could dose-reduce to 200mg based on investigator judgement.

A maximum of two alpelisib dose reductions were permitted, after which the patient was discontinued if the treatment was still not tolerated. In addition, a patient had to permanently discontinue treatment if the same toxicity recurred at the same or greater severity after treatment is resumed at a lower dose. For each patient, once a dose level reduction had occurred, the dose level could not be re-escalated during subsequent treatment cycles except for the second occurrence of grade 1 or grade 2 hyperglycemia.

### **Routine laboratory assessments**

Routine laboratory assessments were conducted at baseline; weekly until Cycle 2, Day 28; and at 2-week intervals thereafter. A reduced assessment schedule was used for patients who completed 6 cycles of study treatment, in which Day 15 visits (vital signs, hematology, biochemistry, and fasting plasma glucose) were no longer required. However, these visits may have continued at the discretion of the Investigator. Other safety assessments, included glucose and cardiovascular monitoring. AEs were graded using Common Terminology Criteria for Adverse Events (CTCAE) v4.0. Tumor assessments were conducted using CT or MRI per RECIST v1.0 at baseline, end of Cycle 2, then every 8 weeks.

### **Pharmacokinetic and pharmacodynamic profiling**

Blood samples for pharmacokinetics and pharmacodynamics assessments were collected pre- and post-dose. For alpelisib QD, blood samples for full PK profiling were collected during Cycle 1 on Days 1 and 8, and during Cycle 2 on Day 1 at pre-dose and at 0.5, 1, 1.5, 2, 3, 4, 6, 8, and 24 h post-dose. In subsequent cycles, samples were collected on Day 1 at pre-dose.

Fasting serum insulin, fasting serum C-peptide and fasting plasma glucose for insulin and glucose safety monitoring were assessed pre-dose prior to the light breakfast at the following time-points: screening/baseline; pre-dose on Days 1, 8 and 15 of Cycle 1; pre-dose on Days 1 and 15 of Cycle 2; pre-dose on Days 1 and 15 of each cycle from Cycle 3 onwards; and of study treatment. Patients must have fasted overnight for at least 8 h.

Plasma concentrations of alpelisib were determined using a validated bioanalytical method with a lower limit of quantification of 1 ng/mL.

### **Next-generation sequencing**

Tumor DNA was extracted from fresh, frozen or formalin-fixed, paraffin-embedded blocks or sections of tumor tissue. Comprehensive cancer genomic profiling was performed using the FoundationOne Assay (Foundation Medicine, Inc., Cambridge, MA, USA). The assay laboratory procedures (preparation of tumor DNA, library construction, and hybrid capture) and computational methods involved in subsequent data analysis have been described previously: Frampton *et al.* Development and validation of a clinical cancer genomic profiling test based on massively parallel DNA sequencing. *Nature Biotechnology* 2013;31:1023–31.

### **Statistical analysis**

Dose-determining set comprised all patients in the safety set who experienced a DLT in Cycle 1 and those who received alpelisib for  $\geq 21$  days, were observed for  $\geq 28$  days and underwent the required safety evaluations for Cycle 1). Patients were eligible for the dose-determining set if, in Cycle 1, they met the minimum treatment and safety evaluation requirements: (1) were treated with the planned dose of alpelisib for  $\geq 21$  days (i.e. received 21 of 28 doses); (2) received 75% of the planned dose of fulvestrant (i.e. received 500 mg on Day 1 and at least 250 mg on Day 15); (3) were observed for  $\geq 28$  days following the Cycle 1 Day 1 dose; and (4) completed all required safety evaluations.

Cohorts of at least one to three patients evaluable for MTD determination per dose level were enrolled in the dose-escalation arm, including at least six patients at the MTD. Before the MTD could be declared, at least 12 patients had to be treated with the combination.

Pharmacokinetic parameters ( $AUC_{0-24}$ ,  $C_{max}$ ,  $t_{max}$  and  $t_{1/2}$ ) for each dose cohort, and at each scheduled timepoint, were analyzed by descriptive statistics, including the median (range). Strip plots of the  $AUC_{0-24}$  and  $C_{max}$  at C1D8 by treatment group were represented to compare the distribution of single agent vs combination administration data.

**eFigure 1. Concentration–Time Profiles of Alpelisib 300–400 mg QD Plus Fulvestrant During Cycle 1**

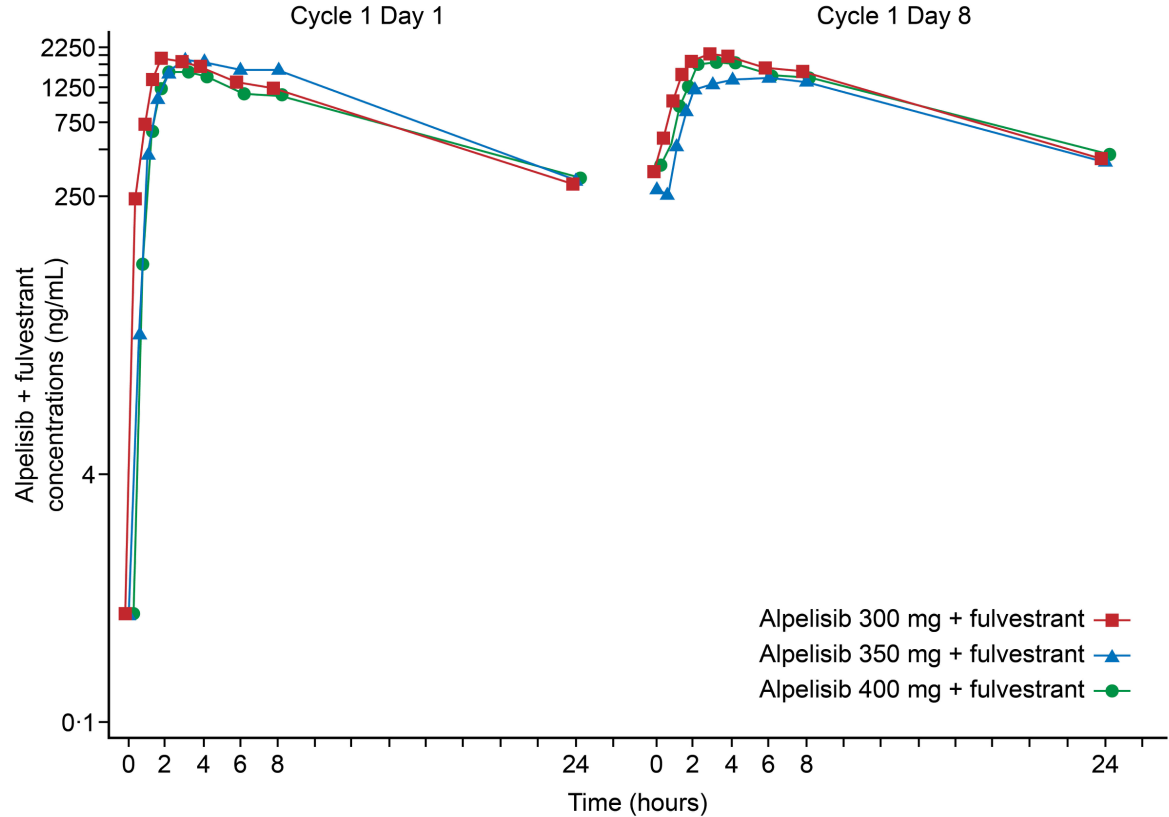

QD, once daily.

**eFigure 2. Strip Plots of Alpelisib Exposure (300–400 mg QD) At Steady State (Cycle 1, Day 8) As Single Agent And In Combination With Fulvestrant**

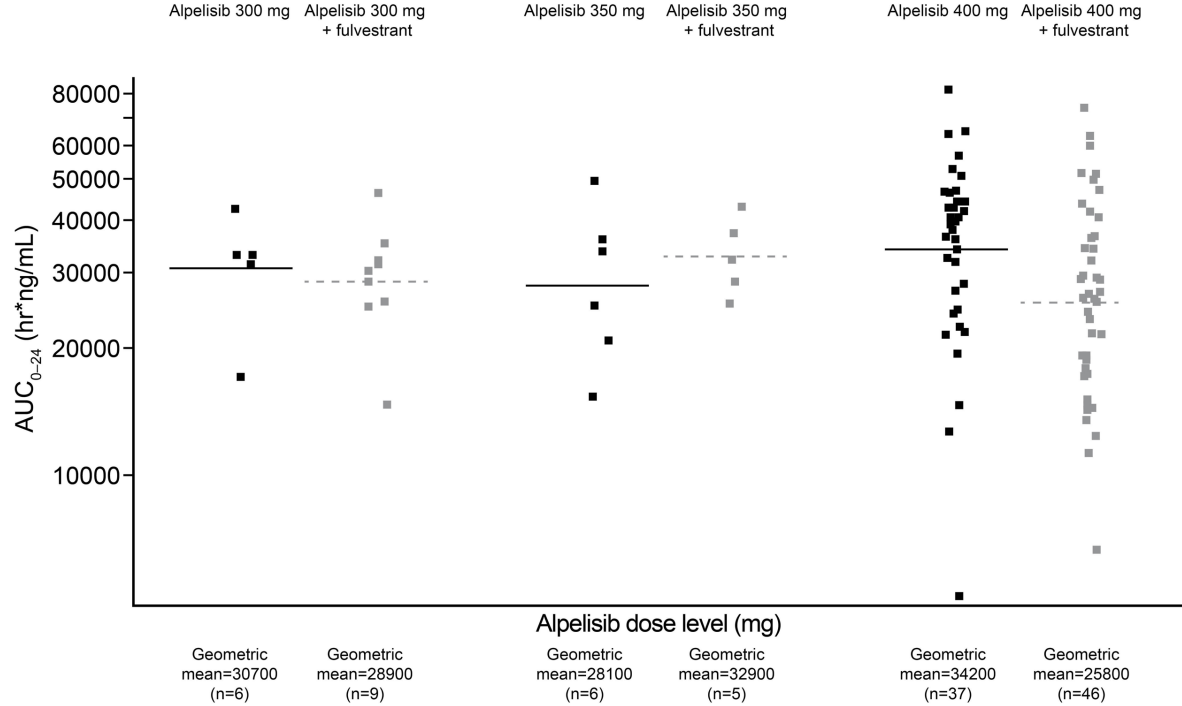

AUC, area under the curve; QD, once daily.

**eFigure 3. Maximum Fold Change of (A) Maximum C-Peptide (nmol/L), (B) Maximum Insulin (pmol/L), and (C) Maximum Glucose (mmol/L) From Baseline During the First 28 Days by Treatment**

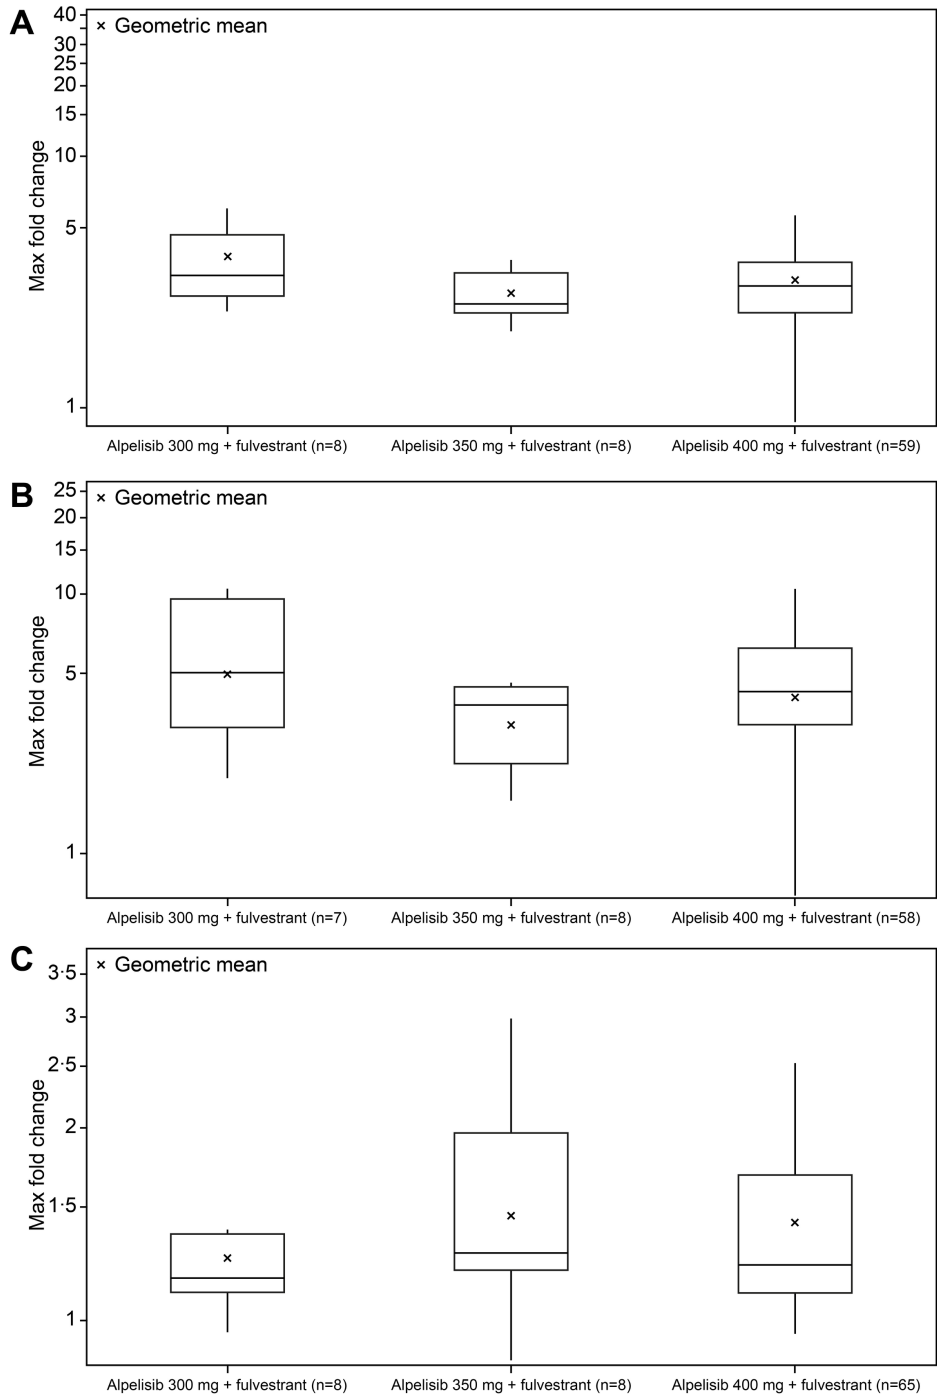

**eFigure 4. Swimmers Plots of Duration of Exposure and Overall Response (per RECIST v1.0) in Patients With (A) *PIK3CA*-Altered, (B) *PIK3CA*-UNK, or (C) *PIK3CA*-Wild-Type ER+ LA/MBC**

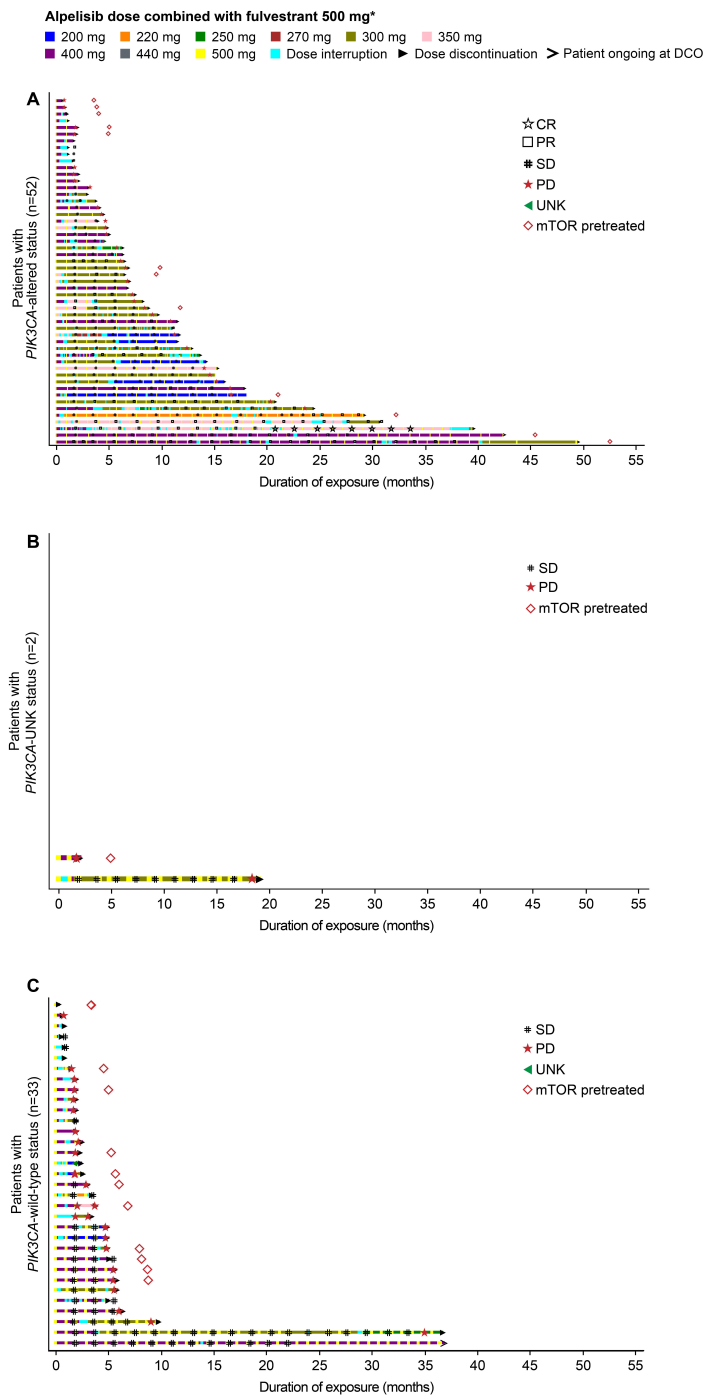

CR, complete response; DCO, data cut-off; ER+, estrogen receptor-positive; HER2+, human epidermal growth factor receptor 2-positive; LA/MBC, locally advanced/metastatic breast cancer; mTOR, mammalian target of rapamycin; PD, progressive disease; PR, partial response; RECIST, Response Evaluation Criteria In Solid Tumors; SD, stable disease; UNK, unknown.

\* Patient with HER2+, ER+ LA/MBC.

Data cut-off: March 22, 2017

**eFigure 5. Most Frequent Somatic Genetic Alterations Observed in Tumor Samples With Known/Likely Functional Significance. NGS analysis and best percentage change from baseline in sum of longest diameters as per investigator by treatment (safety set)**

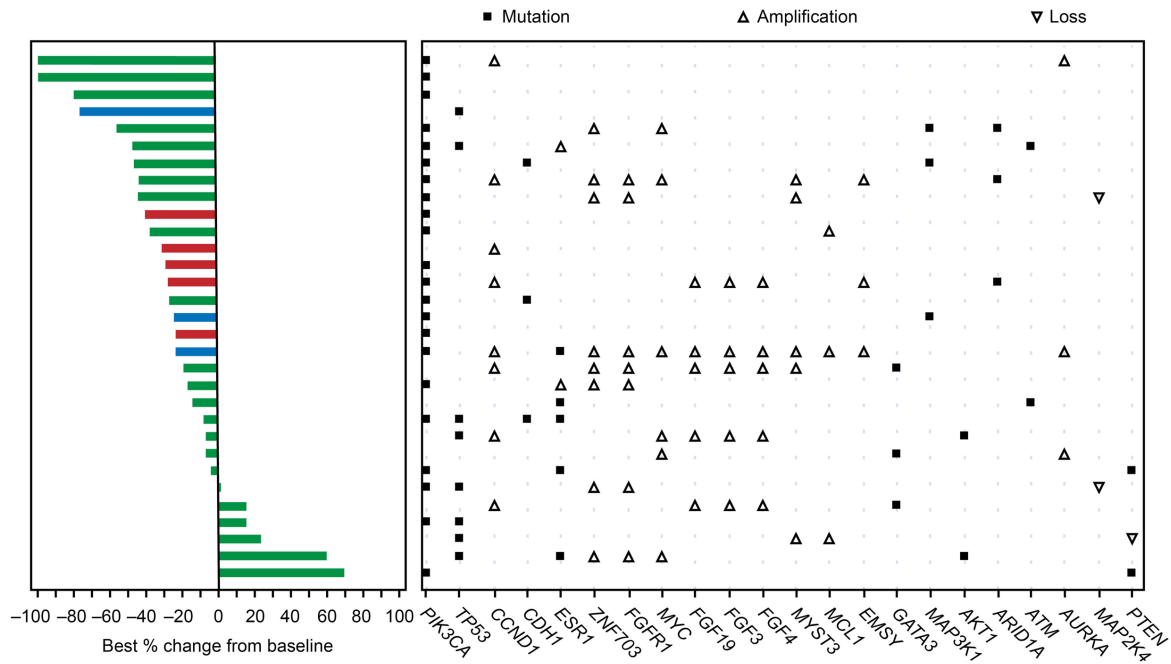

**Treatment group**

- Alpelisib 300 mg + fulvestrant ■
- Alpelisib 350 mg + fulvestrant ■
- Alpelisib 400 mg + fulvestrant ■

NGS, next-generation sequencing.  
 Mutations were assessed centrally by NGS from fresh or archival tumor samples.  
 Data cut-off: 22 March 2017.



**eTable 1. Recruitment Sites**

| <b>Recruitment site (PI)</b>                                                    | <b>Institutional review board/Independent ethics committee</b>                                                                       | <b>Patients recruited</b> | <b>Financial compensation*</b> |
|---------------------------------------------------------------------------------|--------------------------------------------------------------------------------------------------------------------------------------|---------------------------|--------------------------------|
| University of Texas, MD Anderson Cancer Center (Filip Janku)                    | The University of Texas Cancer Center Institutional Review Board, Unit 1437, Houston TX 77030 USA                                    | 18                        | Yes                            |
| Massachusetts General Hospital (Dejan Juric)                                    | Office for Human Research Studies, Dana Farber Cancer Institute, Boston MA 02215 USA                                                 | 17                        | Yes                            |
| University of California, San Francisco Comprehensive Cancer Center (Hope Rugo) | The Committee on Human Research, University of California, San Francisco CA 94118 USA                                                | 12                        | Yes                            |
| Vall d'Hebron Institute of Oncology (Jordi Rodon)                               | CEIC Comite de Etica de Investigacion Clinica, Hospital Universitari de Bellvitge, L'Hospitalet De Llobregat (Barcelona) 08907 Spain | 10                        | Yes                            |
| Sarah Cannon Research Institute/Tennessee Oncology (Howard Burris)              | Integreview Ethical Review Board, Austin TX 78704 USA                                                                                | 9                         | Yes                            |
| Vanderbilt-Ingram Cancer Center (Ingrid Mayer)                                  | Vanderbilt University IRB, Nashville TN 37232-4315 USA                                                                               | 6                         | Yes                            |
| West German Cancer Center (Martin Schuler)                                      | Ethik Kommission, Medizinische Fakultät der Universität, Duisburg Essen, Essen 45147 Germany                                         | 6                         | Yes                            |

|                                                                    |                                                                                                                                              |   |     |
|--------------------------------------------------------------------|----------------------------------------------------------------------------------------------------------------------------------------------|---|-----|
| Comprehensive Cancer Center Mainfranken (Ruth Seggewiss-Bernhardt) | Ethik-Kommission bei der Medizinischen Fakultät der Universität Würzburg, Institut für Pharmakologie und Toxikologie, Würzburg 97078 Germany | 4 | Yes |
| Catalan Institute of Oncology-IDIBELL (Marta Gil-Martin)           | CEIC Comite de Etica de Investigacion Clinica, Hospital Universitari de Bellvitge, L'Hospitalet De Llobregat (Barcelona) 08907 Spain         | 3 | Yes |
| Churchill Hospital Cancer Centre (Mark Middleton)                  | National Research Ethics Service, Oxfordshire REC C, Jarrow NE32 3DT United Kingdom                                                          | 2 | Yes |

\*Reimbursement was provided for travel and accommodation at each site..

**eTable 2. Summary of Pharmacokinetic Parameters for Alpelisib by Cohort (300–400-mg QD) as a Single Agent<sup>15</sup> and in Combination With Fulvestrant**

|                               | Alpelisib Dose and Study Cohort |                               |                            |                               |                            |                                |
|-------------------------------|---------------------------------|-------------------------------|----------------------------|-------------------------------|----------------------------|--------------------------------|
|                               | 300-mg QD                       |                               | 350-mg QD                  |                               | 400-mg QD                  |                                |
| Median (Range) [n]            | Alpelisib (n=8)                 | Alpelisib + Fulvestrant (n=9) | Alpelisib (n=6)            | Alpelisib + Fulvestrant (n=8) | Alpelisib (n=65)           | Alpelisib + Fulvestrant (n=70) |
| <b>Cycle 1, Day 1</b>         |                                 |                               |                            |                               |                            |                                |
| T <sub>max</sub> , h          | 3.0<br>(1.0–7.0) [8]            | 2.0<br>(0.6–7.2) [8]          | 2.3<br>(0.5–4.0) [6]       | 2.6<br>(0.9–6.1) [8]          | 2.0<br>(1.0–7.0) [57]      | 2.1<br>(1.0–8.1) [68]          |
| C <sub>max</sub> , ng/mL      | 2380<br>(735–3580) [8]          | 2710<br>(1340–3430) [8]       | 2650<br>(1350–4280) [6]    | 2350<br>(1760–4230) [8]       | 2760<br>(967–6670) [57]    | 2250<br>(371–5930) [68]        |
| T <sub>1/2</sub> , h          | 7.0<br>(6.1–11.9) [6]           | 8.9<br>(4.9–13.3) [7]         | 7.0<br>(4.7–13.5) [6]      | 7.1<br>(6.0–9.2) [6]          | 7.6<br>(4.6–27.1) [50]     | 8.4<br>(4.2–30.5) [55]         |
| AUC <sub>0–24</sub> , h•ng/mL | 25500<br>(9570–37700) [6]       | 25800<br>(14800–32200) [7]    | 24400<br>(13000–38300) [6] | 24800<br>(15000–45500) [6]    | 29000<br>(9930–68100) [51] | 22900<br>(7440–64900) [60]     |
| <b>Cycle 1, Day 8</b>         |                                 |                               |                            |                               |                            |                                |
| T <sub>max</sub> , h          | 4.0<br>(1.0–6.0) [6]            | 2.1<br>(1.0–4.2) [9]          | 1.8<br>(1.0–3.0) [6]       | 3.0<br>(1.5–6.0) [7]          | 3.0<br>(1.1–8.2) [48]      | 2.2<br>(1.0–8.0) [59]          |
| C <sub>max</sub> , ng/mL      | 2970<br>(2060–3770) [6]         | 2330<br>(1770–3980) [9]       | 3200<br>(1800–5440) [6]    | 2690<br>(346–4220) [7]        | 3560<br>(501–7930) [48]    | 2300<br>(770–7760) [59]        |
| T <sub>1/2</sub> , h          | 7.5<br>(5.6–9.8) [5]            | 8.4<br>(6.5–13.4) [9]         | 7.2<br>(6.0–8.3) [6]       | 8.3<br>(7.2–14.5) [5]         | 7.5<br>(4.5–14.3) [33]     | 9.3<br>(5.5–22.4) [39]         |
| AUC <sub>0–24</sub> , h•ng/mL | 33200<br>(17100–42600) [6]      | 30500<br>(14700–46500) [9]    | 29500<br>(15400–49700) [6] | 32400<br>(25700–43200) [5]    | 39800<br>(5210–81700) [37] | 26200<br>(6710–73800) [46]     |

AUC, area under the curve; C<sub>max</sub>, peak serum concentration; T<sub>1/2</sub>, half-life; T<sub>max</sub>, time to C<sub>max</sub>; QD, once daily.

**eTable 3. Summary of Best Overall Response to Alpelisib (300–400-mg QD) Plus Fulvestrant per RECIST v1.0 in Patients with ER+, HER2– Advanced Breast Cancer with *PIK3CA*-Altered or *PIK3CA*-Wild-Type Tumors**

|                                                 | <i>PIK3CA</i> Altered<br>n=49 |                      |                     |                        | <i>PIK3CA</i><br>Wild-Type<br>n=32 |
|-------------------------------------------------|-------------------------------|----------------------|---------------------|------------------------|------------------------------------|
| Best Overall Response                           | 300-mg QD<br>(n=9)            | 350-mg QD<br>(n=8)   | 400-mg QD<br>(n=32) | All patients<br>(n=49) | 400-mg QD<br>(n=32)                |
| CR                                              | 0                             | 0                    | 0                   | 0                      | 0                                  |
| PR                                              | 3 (33%)                       | 3 (38%)              | 8 (25%)             | 14 (29%)               | 0                                  |
| SD                                              | 6 (67%)                       | 5 (63%)              | 14 (44%)            | 25 (51%)               | 15 (47%)                           |
| PD                                              | 0                             | 0                    | 6 (19%)             | 6 (12%)                | 10 (31%)                           |
| Unknown                                         | 0                             | 0                    | 4 (13%)             | 4 (8%)                 | 7 (22%)                            |
| <b>ORR; CR + PR<br/>[95% CI]</b>                | 3 (33%)<br>[8–70]             | 3 (38%)<br>[9–76]    | 8 (25%)<br>[12–44]  | 14 (29%)<br>[17–43]    | 0<br>[0–11]                        |
| <b>DCR; CR + PR + SD<br/>[95% CI]</b>           | 9 (100%)<br>[66–100]          | 8 (100%)<br>[63–100] | 22 (69%)<br>[50–84] | 39 (80%)<br>[66–90]    | 15 (47%)<br>[29–65]                |
| <b>CBR; CR + PR + SD<br/>≥24 weeks [95% CI]</b> | 4 (44%)<br>[14–79]            | 7 (88%)<br>[47–100]  | 11 (34%)<br>[19–53] | 22 (45%)<br>[31–60]    | 4 (13%)<br>[4–29]                  |
| <b>mPFS, months<br/>[95% CI]</b>                | –                             | –                    | 4.7<br>[4.6–9]      | 9.1<br>[6.6–14.6]      | 5.4<br>[1.9–5.6]                   |

CBR, clinical benefit rate; CI, confidence interval; CR, complete response; DCR, disease control rate; ER+, estrogen receptor-positive; HER2–, human epidermal growth factor receptor 2-negative; mPFS, median progression-free survival; ORR, overall response rate; PD, progressive disease; PR, partial response; RECIST, Response Evaluation Criteria In Solid Tumors; SD, stable disease; QD, once daily. Two patients with unknown *PIK3CA* alteration status are not included. Data cut-off: March 22, 2017

**eTable 4. Duration of Exposure to Alpelisib 300–400 mg QD Plus Fulvestrant in Patients with ER+ ABC by *PIK3CA* Status and mTOR Pretreatment**

|                                            | <i>PIK3CA</i> Altered<br>n=52 |                      | <i>PIK3CA</i> Wild-Type<br>n=33 |                      |
|--------------------------------------------|-------------------------------|----------------------|---------------------------------|----------------------|
|                                            | mTOR pretreated<br>(n=13)     | mTOR naïve<br>(n=39) | mTOR pretreated<br>(n=11)       | mTOR naïve<br>(n=22) |
| <b>Exposure categories (months), n (%)</b> |                               |                      |                                 |                      |
| <6                                         | 6 (46)                        | 16 (41)              | 11 (100)                        | 18 (82)              |
| <6–<12                                     | 3 (23)                        | 12 (31)              | 0                               | 2 (9)                |
| 12–<24                                     | 1 (8)                         | 8 (21)               | 0                               | 0                    |
| ≥24                                        | 3 (23)                        | 3 (8)                | 0                               | 2 (9)                |
| <b>Duration of exposure (months)</b>       |                               |                      |                                 |                      |
| Median (range)                             | 6.5 (0.5–49.5)                | 6.7 (1.0–39.6)       | 3.0 (0.3–5.7)                   | 2.4 (0.6–36.8)       |

ABC, advanced breast cancer; ER+, estrogen receptor-positive; mTOR, mammalian target of rapamycin; QD, once daily.  
Data cut-off: March 22, 2017

**eTable 5. NGS Data by Patients Who Received Alpelisib in Combination With Fulvestrant: *PIK3CA* Mutation**

| Subject Dummy ID | Sample Dummy ID | Primary Site of Cancer Group | Treatment Group Description | Best % Change From Baseline (Evaluated) | BOR | PFS (Days) | <i>PIK3CA</i> Mutation Status | Functional Significance |
|------------------|-----------------|------------------------------|-----------------------------|-----------------------------------------|-----|------------|-------------------------------|-------------------------|
| 1017             | 2018            | Breast                       | 400 mg + Fulv.              | NA                                      | SD  | 404        | Mutant                        | Known                   |
| 1018             | 2019            | Breast                       | 400 mg + Fulv.              | 15.6                                    | PD  | 51         | Wild type                     | UNK                     |
| 1019             | 2020            | Breast                       | 400 mg + Fulv.              | 23.5                                    | PD  | 22         | Wild type                     | UNK                     |
| 1020             | 2021            | Breast                       | 400 mg + Fulv.              | -7.5                                    | SD  | 142        | Wild type                     | UNK                     |
| 1021             | 2022            | Breast                       | 300 mg + Fulv.              | -29.2                                   | SD  | 464        | Mutant                        | Known                   |
| 1022             | 2023            | Breast                       | 350 mg + Fulv.              | -25.3                                   | SD  | 342        | Mutant                        | Known                   |
| 1023             | 2024            | Breast                       | 400 mg + Fulv.              | NA                                      | UNK | 26         | Wild type                     | UNK                     |
| 1030             | 2031            | Breast                       | 400 mg + Fulv.              | -4.1                                    | UNK | 28         | Mutant                        | Known                   |
| 1032             | 2033            | Breast                       | 400 mg + Fulv.              | 69.2                                    | PD  | 54         | Mutant                        | Known                   |
| 1033             | 2034            | Breast                       | 400 mg + Fulv.              | -46.7                                   | PR  | 717        | Mutant                        | Known                   |
| 1057             | 2059            | Breast                       | 300 mg + Fulv.              | -40.0                                   | PR  | 187        | Mutant                        | Known                   |
| 1058             | 2060            | Breast                       | 400 mg + Fulv.              | -100.0                                  | PR  | 303        | Mutant                        | Known                   |
| 1059             | 2061            | Breast                       | 400 mg + Fulv.              | -79.7                                   | PR  | 1150       | Mutant                        | Known                   |
| 1060             | 2062            | Breast                       | 400 mg + Fulv.              | NA                                      | SD  | 162        | Mutant                        | Known                   |
| 1061             | 2063            | Breast                       | 400 mg + Fulv.              | 1.3                                     | SD  | 50         | Mutant                        | Known                   |
| 1062             | 2064            | Breast                       | 400 mg + Fulv.              | -17.2                                   | SD  | 50         | Mutant                        | Known                   |
| 1063             | 2065            | Breast                       | 400 mg + Fulv.              | -37.8                                   | PR  | 874        | Mutant                        | Known                   |
| 1064             | 2066            | Breast                       | 400 mg + Fulv.              | NA                                      | SD  | 107        | Wild type                     | UNK                     |
| 1065             | 2067            | Breast                       | 400 mg + Fulv.              | -47.7                                   | SD  | 52         | Mutant                        | Known                   |
| 1066             | 2068            | Breast                       | 350 mg + Fulv.              | -23.9                                   | SD  | 204        | Mutant                        | Known                   |
| 1066             | 2069            | Breast                       | 350 mg + Fulv.              | -23.9                                   | SD  | 204        | Mutant                        | UNK                     |
| 1067             | 2070            | Breast                       | 300 mg + Fulv.              | -24.0                                   | SD  | 443        | Mutant                        | Known                   |
| 1068             | 2071            | Breast                       | 400 mg + Fulv.              | -55.8                                   | PR  | 330        | Mutant                        | Known                   |
| 1077             | 2080            | Breast                       | 400 mg + Fulv.              | NA                                      | UNK | 1          | Mutant                        | Known                   |
| 1078             | 2081            | Breast                       | 400 mg + Fulv.              | -8.6                                    | SD  | 70         | Mutant                        | Known                   |

|      |      |        |                |        |     |      |           |       |
|------|------|--------|----------------|--------|-----|------|-----------|-------|
| 1079 | 2082 | Breast | 400 mg + Fulv. | -19.9  | SD  | 165  | Wild type | UNK   |
| 1080 | 2083 | Breast | 400 mg + Fulv. | 60.3   | PD  | 53   | Wild type | UNK   |
| 1081 | 2084 | Breast | 350 mg + Fulv. | -76.5  | PR  | 940  | Wild type | Known |
| 1082 | 2085 | Breast | 300 mg + Fulv. | -28.6  | SD  | 131  | Mutant    | Known |
| 1083 | 2086 | Breast | 400 mg + Fulv. | -14.3  | SD  | 179  | Wild type | UNK   |
| 1094 | 2097 | Breast | 300 mg + Fulv. | -30.8  | PR  | 219  | Wild type | Known |
| 1095 | 2098 | Breast | 400 mg + Fulv. | -100.0 | CR  | 1023 | Mutant    | Known |
| 1096 | 2099 | Breast | 400 mg + Fulv. | NA     | SD  | 112  | Mutant    | Known |
| 1097 | 2100 | Breast | 400 mg + Fulv. | -43.8  | PR  | 376  | Mutant    | Known |
| 1098 | 2101 | Breast | 400 mg + Fulv. | -43.8  | PD  | 55   | Mutant    | Known |
| 1101 | 2104 | Breast | 400 mg + Fulv. | NA     | UNK | 1    | Mutant    | Known |
| 1102 | 2105 | Breast | 400 mg + Fulv. | -7.5   | SD  | 140  | Wild type | UNK   |
| 1103 | 2106 | Breast | 400 mg + Fulv. | NA     | SD  | 168  | Wild type | UNK   |
| 1104 | 2107 | Breast | 400 mg + Fulv. | NA     | PD  | 54   | Wild type | UNK   |
| 1106 | 2109 | Breast | 400 mg + Fulv. | -27.6  | SD  | 285  | Mutant    | Known |
| 1107 | 2110 | Breast | 400 mg + Fulv. | 15.9   | SD  | 87   | Mutant    | Known |

BOR, best overall response; CR, complete response; Fulv, fulvestrant; ID, identification; NA, not applicable; NGS, next-generation sequencing; PD, progressive disease; PFS, progression-free survival; PR, partial response; SD, stable disease; UNK, unknown.

**eTable 6. NGS Data Collected at Screening (by Patients who Received Alpelisib Plus Fulvestrant) – Mutations of Known Significance**

| Subject Dummy ID | Sample Dummy ID | Tumor Purity, % | Analyte Name                   | Protein Effect      | Allele Frequency, % |
|------------------|-----------------|-----------------|--------------------------------|---------------------|---------------------|
| 1017             | 2018            | 80              | CDH1                           | (CN DEL)            | NA                  |
| 1017             | 2018            | 80              | KRAS                           | G12D (MUT)          | 28                  |
| 1017             | 2018            | 80              | <i>PIK3CA</i>                  | C420R (MUT)         | 30                  |
| 1018             | 2019            | 40              | CCND1                          | (CN AMP)            | NA                  |
| 1018             | 2019            | 40              | Fibroblast growth factor 19    | (CN AMP)            | NA                  |
| 1018             | 2019            | 40              | Fibroblast growth factor 3     | (CN AMP)            | NA                  |
| 1018             | 2019            | 40              | FGF4                           | (CN AMP)            | NA                  |
| 1018             | 2019            | 40              | GATA3                          | P409fs*38+ (INS)    | 28                  |
| 1018             | 2019            | 40              | STAG2                          | E681fs*10 (SV DEL)  | 5                   |
| 1019             | 2020            | 30              | AKT3                           | (CN AMP)            | NA                  |
| 1019             | 2020            | 30              | CHEK2                          | R95fs*15 (SV DEL)   | 71                  |
| 1019             | 2020            | 30              | CREBBP                         | splice (MUT)        | 48                  |
| 1019             | 2020            | 30              | MCL1                           | (CN AMP)            | NA                  |
| 1019             | 2020            | 30              | MYST3                          | (CN AMP)            | NA                  |
| 1019             | 2020            | 30              | TP53                           | R213* (MUT)         | 47                  |
| 1019             |                 | 30              | Phosphatase and Tensin homolog | (CN DEL)            | NA                  |
| 1020             |                 | 50              | GATA3                          | D336fs*17 (INS)     | 30                  |
| 1020             |                 | 50              | MYC                            | (CN AMP)            | NA                  |
| 1020             |                 | 50              | ZNF217                         | (CN AMP)            | NA                  |
| 1020             | 2021            | 40              | AURKA                          | (CN AMP)            | NA                  |
| 1020             | 2021            | 40              | GATA3                          | D336fs*17 (INS)     | 16                  |
| 1020             | 2021            | 40              | GNAS                           | (CN AMP)            | NA                  |
| 1020             | 2021            | 40              | MDM2                           | (CN AMP)            | NA                  |
| 1020             | 2021            | 40              | MDM4                           | (CN AMP)            | NA                  |
| 1020             | 2021            | 40              | MYC                            | (CN AMP)            | NA                  |
| 1020             | 2021            | 40              | SRC                            | (CN AMP)            | NA                  |
| 1020             | 2021            | 40              | TOP1                           | (CN AMP)            | NA                  |
| 1020             | 2021            | 40              | ZNF217                         | (CN AMP)            | NA                  |
| 1021             | 2022            | 50              | <i>PIK3CA</i>                  | E542A (MUT)         | 45                  |
| 1021             | 2022            | 50              | <i>PIK3CA</i>                  | Y1021H (MUT)        | 46                  |
| 1022             | 2023            | 50              | MAP3K1                         | K1037fs*44 (SV DEL) | 36                  |
| 1022             | 2023            | 50              | MAP3K1                         | P215fs*5 (SV DEL)   | 26                  |
| 1022             | 2023            | 50              | <i>PIK3CA</i>                  | H1047R (MUT)        | 49                  |
| 1023             | 2024            | 60              | AKT1                           | E17K (MUT)          | 20                  |



|      |      |    |                                |                    |    |
|------|------|----|--------------------------------|--------------------|----|
| 1023 | 2024 | 60 | ATM                            | T1871I (MUT)       | 61 |
| 1023 | 2024 | 60 | CCND1                          | (CN AMP)           | NA |
| 1023 | 2024 | 60 | MYST3                          | (CN AMP)           | NA |
| 1030 | 2031 | 50 | Estrogen receptor 1            | D538G (MUT)        | 22 |
| 1030 | 2031 | 50 | <i>PIK3CA</i>                  | G12D (MUT)         | 32 |
| 1030 | 2031 | 50 | <i>PIK3CA</i>                  | Q546R (MUT)        | 3  |
| 1030 | 2031 | 50 | Phosphatase and Tensin homolog | R130Q (MUT)        | 64 |
| 1032 | 2033 | 20 | <i>PIK3CA</i>                  | E545K (MUT)        | 7  |
| 1032 | 2033 | 20 | Phosphatase and Tensin homolog | T167P (MUT)        | 11 |
| 1033 | 2034 | 70 | CDH1                           | splice (MUT)       | 58 |
| 1033 | 2034 | 70 | MAP3K1                         | E1490fs*31+ (INS)  | 40 |
| 1033 | 2034 | 70 | MTOR                           | E1799K (MUT)       | 2  |
| 1033 | 2034 | 70 | <i>PIK3CA</i>                  | H1047R (MUT)       | 41 |
| 1057 | 2059 | 40 | Cyclin dependent kinase-4      | (CN AMP)           | NA |
| 1057 | 2059 | 40 | NF1                            | S1355* (MUT)       | 11 |
| 1057 | 2059 | 40 | <i>PIK3CA</i>                  | E542K (MUT)        | 17 |
| 1057 | 2059 | 40 | <i>PIK3CA</i>                  | E726K (MUT)        | 6  |
| 1058 | 2060 | 90 | <i>PIK3CA</i>                  | H1047R (MUT)       | 34 |
| 1058 | 2060 | 90 | RET                            | (CN AMP)           | NA |
| 1059 | 2061 | 20 | PAX5                           | S213L (MUT)        | 44 |
| 1059 | 2061 | 20 | <i>PIK3CA</i>                  | H1047L (MUT)       | 13 |
| 1060 | 2062 | 40 | Estrogen receptor 1            | Y537S (MUT)        | 23 |
| 1060 | 2062 | 40 | MAP3K1                         | N255fs*45 (SV DEL) | 29 |
| 1060 | 2062 | 40 | MAP3K1                         | P243fs*19 (SV DEL) | 23 |
| 1060 | 2062 | 40 | MCL1                           | (CN AMP)           | NA |
| 1060 | 2062 | 40 | MYC                            | (CN AMP)           | NA |
| 1060 | 2062 | 40 | PBRM1                          | R1027* (MUT)       | 18 |
| 1060 | 2062 | 40 | <i>PIK3CA</i>                  | C378F (MUT)        | 42 |
| 1060 | 2062 | 40 | <i>PIK3CA</i>                  | H1047R (MUT)       | 47 |
| 1060 | 2062 | 40 | PRSS8                          | (CN AMP)           | NA |
| 1060 | 2062 | 40 | TP53                           | S303fs*42 (SV DEL) | 37 |
| 1061 | 2063 | 90 | EPHA3                          | (CN AMP)           | NA |
| 1061 | 2063 | 90 | Fibroblast growth receptor 1   | (CN AMP)           | NA |
| 1061 | 2063 | 90 | MAP2K4                         | (CN DEL)           | NA |
| 1061 | 2063 | 90 | <i>PIK3CA</i>                  | E542K (MUT)        | 45 |
| 1061 | 2063 | 90 | TP53                           | splice (MUT)       | 83 |
| 1061 | 2063 | 90 | ZNF703                         | (CN AMP)           | NA |
| 1062 | 2064 | 30 | Estrogen receptor 1            | (CN AMP)           | NA |

|      |      |    |                              |                       |    |
|------|------|----|------------------------------|-----------------------|----|
| 1062 | 2064 | 30 | Fibroblast growth receptor 1 | (CN AMP)              | NA |
| 1062 | 2064 | 30 | <i>PIK3CA</i>                | E542K (MUT)           | 19 |
| 1062 | 2064 | 30 | ZNF703                       | (CN AMP)              | NA |
| 1063 | 2065 | 20 | MCL1                         | (CN AMP)              | NA |
| 1063 | 2065 | 20 | <i>PIK3CA</i>                | H1047R (MUT)          | 3  |
| 1063 | 2065 | 20 | <i>PIK3CA</i>                | N345K (MUT)           | 7  |
| 1063 | 2065 | 20 | <i>PIK3CA</i>                | Q546P (MUT)           | 3  |
| 1064 | 2066 | 30 | CCND1                        | (CN AMP)              | NA |
| 1064 | 2066 | 30 | CDH1                         | P159fs*56 (SV DEL)    | 12 |
| 1064 | 2066 | 30 | EMSY                         | (CN AMP)              | NA |
| 1064 | 2066 | 30 | ERBB2                        | L755_T759del (SV DEL) | 7  |
| 1064 | 2066 | 30 | Fibroblast growth factor 19  | (CN AMP)              | NA |
| 1064 | 2066 | 30 | Fibroblast growth factor 3   | (CN AMP)              | NA |
| 1064 | 2066 | 30 | FGF4                         | (CN AMP)              | NA |
| 1064 | 2066 | 30 | NCOR1                        | S70fs*60 (SV DEL)     | 11 |
| 1064 | 2066 | 30 | TBX3                         | D367fs*265 (SV DEL)   | 10 |
| 1065 | 2067 | 50 | ATM                          | R189K (MUT)           | 6  |
| 1065 | 2067 | 50 | Estrogen receptor 1          | (CN AMP)              | NA |
| 1065 | 2067 | 50 | <i>PIK3CA</i>                | E418K (MUT)           | 56 |
| 1065 | 2067 | 50 | <i>PIK3CA</i>                | E545K (MUT)           | 53 |
| 1065 | 2067 | 50 | TP53                         | C242fs*84 (SV DEL)    | 32 |
| 1066 | 2068 | 50 | ARFRP1                       | (CN AMP)              | NA |
| 1066 | 2068 | 50 | AURKA                        | (CN AMP)              | NA |
| 1066 | 2068 | 50 | CCND1                        | (CN AMP)              | NA |
| 1066 | 2068 | 50 | EMSY                         | (CN AMP)              | NA |
| 1066 | 2068 | 50 | Estrogen receptor 1          | Y537S (MUT)           | 22 |
| 1066 | 2068 | 50 | Fibroblast growth factor 19  | (CN AMP)              | NA |
| 1066 | 2068 | 50 | Fibroblast growth factor 3   | (CN AMP)              | NA |
| 1066 | 2068 | 50 | FGF4                         | (CN AMP)              | NA |
| 1066 | 2068 | 50 | Fibroblast growth receptor 1 | (CN AMP)              | NA |
| 1066 | 2068 | 50 | GNAS                         | (CN AMP)              | NA |
| 1066 | 2068 | 50 | IKBKE                        | (CN AMP)              | NA |
| 1066 | 2068 | 50 | KDR                          | (CN AMP)              | NA |
| 1066 | 2068 | 50 | KIT                          | (CN AMP)              | NA |
| 1066 | 2068 | 50 | MCL1                         | (CN AMP)              | NA |
| 1066 | 2068 | 50 | MDM4                         | (CN AMP)              | NA |

|      |      |    |                              |                     |    |
|------|------|----|------------------------------|---------------------|----|
| 1066 | 2068 | 50 | MYC                          | (CN AMP)            | NA |
| 1066 | 2068 | 50 | MYST3                        | (CN AMP)            | NA |
| 1066 | 2068 | 50 | NFKBIA                       | (CN AMP)            | NA |
| 1066 | 2068 | 50 | PDGFRA                       | (CN AMP)            | NA |
| 1066 | 2068 | 50 | <i>PIK3CA</i>                | E542K (MUT)         | 39 |
| 1066 | 2068 | 50 | <i>PIK3CA</i>                | E545K (MUT)         | 39 |
| 1066 | 2068 | 50 | TOP1                         | (CN AMP)            | NA |
| 1066 | 2068 | 50 | ZNF217                       | (CN AMP)            | NA |
| 1066 | 2068 | 50 | ZNF703                       | (CN AMP)            | NA |
| 1067 | 2070 | 80 | DNMT3A                       | (CN DEL)            | NA |
| 1067 | 2070 | 80 | <i>PIK3CA</i>                | E545A (MUT)         | 32 |
| 1068 | 2071 | 30 | ARID1A                       | R1721* (MUT)        | 9  |
| 1068 | 2071 | 30 | MAP3K1                       | S371fs*1 (INS)      | 28 |
| 1068 | 2071 | 30 | MAP3K1                       | T1148fs*3 (INS)     | 23 |
| 1068 | 2071 | 30 | MYC                          | (CN AMP)            | NA |
| 1068 | 2071 | 30 | <i>PIK3CA</i>                | H1047L (MUT)        | 37 |
| 1068 | 2071 | 30 | ZNF703                       | (CN AMP)            | NA |
| 1077 | 2080 | 70 | Fibroblast growth receptor 2 | (CN AMP)            | NA |
| 1077 | 2080 | 70 | <i>PIK3CA</i>                | T1025S (MUT)        | 38 |
| 1077 | 2080 | 70 | TP53                         | E271* (MUT)         | 24 |
| 1078 | 2081 | 70 | CDH1                         | Y228fs*1 (INS)      | 67 |
| 1078 | 2081 | 70 | Estrogen receptor 1          | D538G (MUT)         | 69 |
| 1078 | 2081 | 70 | <i>PIK3CA</i>                | E545K (MUT)         | 72 |
| 1078 | 2081 | 70 | 13q14(RB1)V                  | S347fs*2 (SV DEL)   | 76 |
| 1078 | 2081 | 70 | RUNX1                        | Q262* (MUT)         | 39 |
| 1078 | 2081 | 70 | TP53                         | I251fs*95 (INS)     | 64 |
| 1079 | 2082 | 20 | CCND1                        | (CN AMP)            | NA |
| 1079 | 2082 | 20 | Fibroblast growth factor 19  | (CN AMP)            | NA |
| 1079 | 2082 | 20 | Fibroblast growth factor 3   | (CN AMP)            | NA |
| 1079 | 2082 | 20 | FGF4                         | (CN AMP)            | NA |
| 1079 | 2082 | 20 | Fibroblast growth receptor 1 | (CN AMP)            | NA |
| 1079 | 2082 | 20 | GATA3                        | M401fs*45+ (SV DEL) | 14 |
| 1079 | 2082 | 20 | MYST3                        | (CN AMP)            | NA |
| 1079 | 2082 | 20 | ZNF703                       | (CN AMP)            | NA |
| 1080 | 2083 | 40 | AKT1                         | E17K (MUT)          | 40 |
| 1080 | 2083 | 40 | Estrogen receptor 1          | Y537S (MUT)         | 17 |
| 1080 | 2083 | 40 | Fibroblast growth receptor 1 | (CN AMP)            | NA |
| 1080 | 2083 | 40 | TP53                         | P36fs*7 (INS)       | 59 |

|      |       |    |                                 |                          |    |
|------|-------|----|---------------------------------|--------------------------|----|
| 1080 | 2083  | 40 | ZNF703                          | (CN AMP)                 | NA |
| 1080 |       | 40 | ATRX                            | truncation<br>(REARR)    | NA |
| 1080 |       | 40 | MYC                             | (CN AMP)                 | NA |
| 1081 | 2084  | 20 | SMARCA4                         | R801H (MUT)              | 51 |
| 1081 | 2084  | 20 | TP53                            | H179Y (MUT)              | 2  |
| 1082 | 2085  | 30 | ARID1A                          | S138* (MUT)              | 40 |
| 1082 | 2085  | 30 | CCND1                           | (CN AMP)                 | NA |
| 1082 | 2085  | 30 | EMSY                            | (CN AMP)                 | NA |
| 1082 | 2085  | 30 | Fibroblast growth<br>factor 19  | (CN AMP)                 | NA |
| 1082 | 2085  | 30 | Fibroblast growth<br>factor 3   | (CN AMP)                 | NA |
| 1082 | 2085  | 30 | FGF4                            | (CN AMP)                 | NA |
| 1082 | 2085  | 30 | <i>PIK3CA</i>                   | E545K (MUT)              | 42 |
| 1083 | 2086  | 20 | ATM                             | R189K (MUT)              | 6  |
| 1083 | 2086  | 20 | EP300                           | P886fs*22 (SV<br>DEL)    | 7  |
| 1083 | 2086  | 20 | Estrogen receptor 1             | D538G (MUT)              | 7  |
| 1094 | 2097  | 30 | CCND1                           | (CN AMP)                 | NA |
| 1095 | 2098  | 60 | ARFRP1                          | (CN AMP)                 | NA |
| 1095 | 2098  | 60 | AURKA                           | (CN AMP)                 | NA |
| 1095 | 2098  | 60 | CCND1                           | (CN AMP)                 | NA |
| 1095 | 2098  | 60 | ERBB2                           | (CN AMP)                 | NA |
| 1095 | 2098  | 60 | NF1                             | S1100fs*7                | 5  |
| 1095 | 2098  | 60 | <i>PIK3CA</i>                   | H1047R (MUT)             | 44 |
| 1095 | 2098  | 60 | PTPRD                           | R1323C (MUT)             | 21 |
| 1096 | 2099  | 70 | CDH1                            | Q255* (MUT)              | 30 |
| 1096 | 2099  | 70 | KRAS                            | G12V (MUT)               | 3  |
| 1096 | 2099  | 70 | MCL1                            | (CN AMP)                 | NA |
| 1096 | 2099  | 70 | NFE2L2                          | W8R (MUT)                | 16 |
| 1096 | 2099  | 70 | <i>PIK3CA</i>                   | E545K (MUT)              | 14 |
| 1096 | 2099  | 70 | TBX3                            | F136fs*3 (SV DEL)        | 29 |
| 1096 | 2099  | 70 | TBX3                            | N630fs*2 (SV DEL)        | 28 |
| 1097 | 2100  | 60 | Fibroblast growth<br>receptor 1 | (CN AMP)                 | NA |
| 1097 | 2100  | 60 | MAP2K4                          | (CN DEL)                 | NA |
| 1097 | 2100  | 60 | MYST3                           | (CN AMP)                 | NA |
| 1097 | 2100  | 60 | <i>PIK3CA</i>                   | E545K (MUT)              | 40 |
| 1097 | 2100  | 60 | 13q14(RB1)V                     | I532fs*11 (SV<br>DEL)    | 66 |
| 1097 | 2100  | 60 | ZNF703                          | (CN AMP)                 | NA |
| 1098 | 210]1 | 20 | ARID1A                          | Q1334_R1335insQ<br>(INS) | 22 |
| 1098 | 2101  | 20 | CCND1                           | (CN AMP)                 | NA |

|      |      |    |                              |                            |    |
|------|------|----|------------------------------|----------------------------|----|
| 1098 | 2101 | 20 | EMSY                         | (CN AMP)                   | NA |
| 1098 | 2101 | 20 | Fibroblast growth receptor 1 | (CN AMP)                   | NA |
| 1098 | 2101 | 20 | MYC                          | (CN AMP)                   | NA |
| 1098 | 2101 | 20 | MYST3                        | (CN AMP)                   | NA |
| 1098 | 2101 | 20 | <i>PIK3CA</i>                | H1047R (MUT)               | 24 |
| 1098 | 2101 | 20 | ZNF703                       | (CN AMP)                   | NA |
| 1098 |      | 20 | SMARCA4                      | deletion (REARR)           | NA |
| 1101 | 2104 | 40 | CDH1                         | Q23* (MUT)                 | 73 |
| 1101 | 2104 | 40 | MAP2K4                       | (CN DEL)                   | NA |
| 1101 | 2104 | 40 | <i>PIK3CA</i>                | E545K (MUT)                | 44 |
| 1102 | 2105 | 30 | AKT1                         | E17K (MUT)                 | 39 |
| 1102 | 2105 | 30 | CCND1                        | (CN AMP)                   | NA |
| 1102 | 2105 | 30 | Fibroblast growth factor 19  | (CN AMP)                   | NA |
| 1102 | 2105 | 30 | Fibroblast growth factor 3   | (CN AMP)                   | NA |
| 1102 | 2105 | 30 | FGF4                         | (CN AMP)                   | NA |
| 1102 | 2105 | 30 | MYC                          | (CN AMP)                   | NA |
| 1102 | 2105 | 30 | TP53                         | R248G (MUT)                | 36 |
| 1103 | 2106 | 20 | GATA3                        | S402fs*45+ (INS)           | 13 |
| 1103 | 2106 | 20 | TP53                         | V10I (MUT)                 | 32 |
| 1104 | 2107 | 25 | BRCA1                        | splice site 594-2A>C (MUT) | 45 |
| 1104 | 2107 | 25 | CDH1                         | S111fs*6 (SV DEL)          | 17 |
| 1106 | 2109 | 20 | CDH1                         | I566fs*22 (INS)            | 21 |
| 1106 | 2109 | 20 | <i>PIK3CA</i>                | H1047R (MUT)               | 12 |
| 1107 | 2110 | 30 | <i>PIK3CA</i>                | H1047R (MUT)               | 2  |
| 1107 | 2110 | 30 | TP53                         | R175H (MUT)                | 2  |

ID, identification; MUT, mutant; NA, not applicable; NGS, next-generation sequencing.

**eTable 7. NGS Data Collected at Screening (by Patients Who Received Alpelisib Plus Fulvestrant) – Mutations of Unknown Significance**

| Subject Dummy ID | Sample Dummy ID | Tumor Purity, % | Analyte Name |
|------------------|-----------------|-----------------|--------------|
| 1017             | 2018            | 80              | ABL1         |
| 1017             | 2018            | 80              | AKT1         |
| 1017             | 2018            | 80              | AKT2         |
| 1017             | 2018            | 80              | AKT3         |
| 1017             | 2018            | 80              | ALK          |
| 1017             | 2018            | 80              | ALOX12B      |
| 1017             | 2018            | 80              | APC          |
| 1017             | 2018            | 80              | APCDD1       |
| 1017             | 2018            | 80              | AR           |
| 1017             | 2018            | 80              | ARAF         |
| 1017             | 2018            | 80              | ARFRP1       |
| 1017             | 2018            | 80              | ARID1A       |
| 1017             | 2018            | 80              | ARID2        |
| 1017             | 2018            | 80              | ASXL1        |
| 1017             | 2018            | 80              | ATM          |
| 1017             | 2018            | 80              | ATR          |
| 1017             | 2018            | 80              | ATRX         |
| 1017             | 2018            | 80              | AURKA        |
| 1017             | 2018            | 80              | AURKB        |
| 1017             | 2018            | 80              | AXL          |
| 1017             | 2018            | 80              | BACH1        |
| 1017             | 2018            | 80              | BAP1         |
| 1017             | 2018            | 80              | BARD1        |
| 1017             | 2018            | 80              | BCL-2        |
| 1017             | 2018            | 80              | BCL2L2       |
| 1017             | 2018            | 80              | BCL6         |
| 1017             | 2018            | 80              | BCOR         |
| 1017             | 2018            | 80              | BCORL1       |
| 1017             | 2018            | 80              | BCR          |
| 1017             | 2018            | 80              | BLM          |
| 1017             | 2018            | 80              | BRAF         |
| 1017             | 2018            | 80              | BRCA1        |
| 1017             | 2018            | 80              | BRCA2        |
| 1017             | 2018            | 80              | BRIP1        |
| 1017             | 2018            | 80              | BTG1         |
| 1017             | 2018            | 80              | BTK          |
| 1017             | 2018            | 80              | C17orf39     |

|      |      |    |                                       |
|------|------|----|---------------------------------------|
| 1017 | 2018 | 80 | CARD11                                |
| 1017 | 2018 | 80 | CASP8                                 |
| 1017 | 2018 | 80 | CBFB                                  |
| 1017 | 2018 | 80 | CBL                                   |
| 1017 | 2018 | 80 | CCND1                                 |
| 1017 | 2018 | 80 | CCND2                                 |
| 1017 | 2018 | 80 | CCND3                                 |
| 1017 | 2018 | 80 | CCNE1                                 |
| 1017 | 2018 | 80 | CD79A                                 |
| 1017 | 2018 | 80 | CD79B                                 |
| 1017 | 2018 | 80 | CDC73                                 |
| 1017 | 2018 | 80 | CDK12                                 |
| 1017 | 2018 | 80 | Cyclin dependent kinase-4             |
| 1017 | 2018 | 80 | CDK6                                  |
| 1017 | 2018 | 80 | CDK8                                  |
| 1017 | 2018 | 80 | CDKN1B                                |
| 1017 | 2018 | 80 | CDKN2A                                |
| 1017 | 2018 | 80 | CDKN2B                                |
| 1017 | 2018 | 80 | CDKN2C                                |
| 1017 | 2018 | 80 | CCAT/enhancer binding protein (CEBPA) |
| 1017 | 2018 | 80 | CHEK1                                 |
| 1017 | 2018 | 80 | CHEK2                                 |
| 1017 | 2018 | 80 | CHUK                                  |
| 1017 | 2018 | 80 | CIC                                   |
| 1017 | 2018 | 80 | CRBN                                  |
| 1017 | 2018 | 80 | CREBBP                                |
| 1017 | 2018 | 80 | CRKL                                  |
| 1017 | 2018 | 80 | CRLF2                                 |
| 1017 | 2018 | 80 | CSF1R                                 |
| 1017 | 2018 | 80 | CTCF                                  |
| 1017 | 2018 | 80 | CTNNA1                                |
| 1017 | 2018 | 80 | CTNNB1                                |
| 1017 | 2018 | 80 | CUL4A                                 |
| 1017 | 2018 | 80 | CUL4B                                 |
| 1017 | 2018 | 80 | CYP17A1                               |
| 1017 | 2018 | 80 | DAXX                                  |
| 1017 | 2018 | 80 | DDR2                                  |
| 1017 | 2018 | 80 | DIS3                                  |
| 1017 | 2018 | 80 | DNMT3A                                |
| 1017 | 2018 | 80 | DOT1L                                 |

|      |      |    |                                  |
|------|------|----|----------------------------------|
| 1017 | 2018 | 80 | Epidermal Growth Factor Receptor |
| 1017 | 2018 | 80 | EMSY                             |
| 1017 | 2018 | 80 | EP300                            |
| 1017 | 2018 | 80 | EPHA3                            |
| 1017 | 2018 | 80 | EPHA5                            |
| 1017 | 2018 | 80 | EPHB1                            |
| 1017 | 2018 | 80 | ERBB2                            |
| 1017 | 2018 | 80 | ERBB3                            |
| 1017 | 2018 | 80 | ERBB4                            |
| 1017 | 2018 | 80 | ERG                              |
| 1017 | 2018 | 80 | Estrogen receptor 1              |
| 1017 | 2018 | 80 | ETV1                             |
| 1017 | 2018 | 80 | ETV4                             |
| 1017 | 2018 | 80 | ETV5                             |
| 1017 | 2018 | 80 | ETV6                             |
| 1017 | 2018 | 80 | EWSR1                            |
| 1017 | 2018 | 80 | EZH2                             |
| 1017 | 2018 | 80 | FAM123B(WTX)                     |
| 1017 | 2018 | 80 | FAM46C                           |
| 1017 | 2018 | 80 | FANCA                            |
| 1017 | 2018 | 80 | FANCC                            |
| 1017 | 2018 | 80 | FANCD2                           |
| 1017 | 2018 | 80 | FANCE                            |
| 1017 | 2018 | 80 | FANCF                            |
| 1017 | 2018 | 80 | FANCG                            |
| 1017 | 2018 | 80 | FANCI                            |
| 1017 | 2018 | 80 | FANCL                            |
| 1017 | 2018 | 80 | FANCM                            |
| 1017 | 2018 | 80 | FAT3                             |
| 1017 | 2018 | 80 | FBXW7                            |
| 1017 | 2018 | 80 | FGF10                            |
| 1017 | 2018 | 80 | FGF12                            |
| 1017 | 2018 | 80 | FGF14                            |
| 1017 | 2018 | 80 | Fibroblast growth factor 19      |
| 1017 | 2018 | 80 | Fibroblast growth factor 23      |
| 1017 | 2018 | 80 | Fibroblast growth factor 3       |
| 1017 | 2018 | 80 | FGF4                             |
| 1017 | 2018 | 80 | FGF6                             |
| 1017 | 2018 | 80 | FGF7                             |
| 1017 | 2018 | 80 | Fibroblast growth receptor 1     |



|      |      |    |                                                  |
|------|------|----|--------------------------------------------------|
| 1017 | 2018 | 80 | Fibroblast growth receptor 2                     |
| 1017 | 2018 | 80 | Fibroblast growth receptor 3                     |
| 1017 | 2018 | 80 | Fibroblast growth receptor 4                     |
| 1017 | 2018 | 80 | FLT1                                             |
| 1017 | 2018 | 80 | Fms-like tyrosine kinase 3 (FLT3)                |
| 1017 | 2018 | 80 | FLT4                                             |
| 1017 | 2018 | 80 | FOXL2                                            |
| 1017 | 2018 | 80 | GATA1                                            |
| 1017 | 2018 | 80 | GATA2                                            |
| 1017 | 2018 | 80 | GATA3                                            |
| 1017 | 2018 | 80 | GNA11                                            |
| 1017 | 2018 | 80 | GNA13                                            |
| 1017 | 2018 | 80 | GNAQ                                             |
| 1017 | 2018 | 80 | GNAS                                             |
| 1017 | 2018 | 80 | GPR124                                           |
| 1017 | 2018 | 80 | GRIN2A                                           |
| 1017 | 2018 | 80 | GSK3B                                            |
| 1017 | 2018 | 80 | Hepatocyte growth factor                         |
| 1017 | 2018 | 80 | HLA-A                                            |
| 1017 | 2018 | 80 | HRAS                                             |
| 1017 | 2018 | 80 | IDH1                                             |
| 1017 | 2018 | 80 | IDH2                                             |
| 1017 | 2018 | 80 | Insulin-like growth factor 1                     |
| 1017 | 2018 | 80 | Insulin growth factor 1 receptor                 |
| 1017 | 2018 | 80 | Insulin-like growth factor 2, also somatomedin A |
| 1017 | 2018 | 80 | IKBKE                                            |
| 1017 | 2018 | 80 | IKZF1                                            |
| 1017 | 2018 | 80 | IL7R                                             |
| 1017 | 2018 | 80 | INHBA                                            |
| 1017 | 2018 | 80 | IRF4                                             |
| 1017 | 2018 | 80 | IRS2                                             |
| 1017 | 2018 | 80 | JAK1                                             |
| 1017 | 2018 | 80 | JAK2                                             |
| 1017 | 2018 | 80 | JAK3                                             |
| 1017 | 2018 | 80 | JUN                                              |
| 1017 | 2018 | 80 | KDM5A                                            |
| 1017 | 2018 | 80 | KDM5C                                            |
| 1017 | 2018 | 80 | KDM6A                                            |
| 1017 | 2018 | 80 | KDR                                              |
| 1017 | 2018 | 80 | KEAP1                                            |

|      |      |    |                                                |
|------|------|----|------------------------------------------------|
| 1017 | 2018 | 80 | KIT                                            |
| 1017 | 2018 | 80 | KLHL6                                          |
| 1017 | 2018 | 80 | LMO1                                           |
| 1017 | 2018 | 80 | LRP1B                                          |
| 1017 | 2018 | 80 | MAP2K1                                         |
| 1017 | 2018 | 80 | MAP2K2                                         |
| 1017 | 2018 | 80 | MAP2K4                                         |
| 1017 | 2018 | 80 | MAP3K1                                         |
| 1017 | 2018 | 80 | MAP3K13                                        |
| 1017 | 2018 | 80 | MCL1                                           |
| 1017 | 2018 | 80 | MDM2                                           |
| 1017 | 2018 | 80 | MDM4                                           |
| 1017 | 2018 | 80 | MED12                                          |
| 1017 | 2018 | 80 | MEF2B                                          |
| 1017 | 2018 | 80 | MEN1                                           |
| 1017 | 2018 | 80 | MET                                            |
| 1017 | 2018 | 80 | Microphthalmia associated transcription factor |
| 1017 | 2018 | 80 | MLH1                                           |
| 1017 | 2018 | 80 | MLL                                            |
| 1017 | 2018 | 80 | MLL2                                           |
| 1017 | 2018 | 80 | MPL                                            |
| 1017 | 2018 | 80 | MRE11A                                         |
| 1017 | 2018 | 80 | MSH2                                           |
| 1017 | 2018 | 80 | MSH6                                           |
| 1017 | 2018 | 80 | MTOR                                           |
| 1017 | 2018 | 80 | MUTYH                                          |
| 1017 | 2018 | 80 | MYC                                            |
| 1017 | 2018 | 80 | MYCL1                                          |
| 1017 | 2018 | 80 | MYCN                                           |
| 1017 | 2018 | 80 | MYD88                                          |
| 1017 | 2018 | 80 | MYST3                                          |
| 1017 | 2018 | 80 | NBN                                            |
| 1017 | 2018 | 80 | NCOR1                                          |
| 1017 | 2018 | 80 | NF1                                            |
| 1017 | 2018 | 80 | NF2                                            |
| 1017 | 2018 | 80 | NFE2L2                                         |
| 1017 | 2018 | 80 | NFKBIA                                         |
| 1017 | 2018 | 80 | NKX2-1                                         |
| 1017 | 2018 | 80 | NOTCH1                                         |
| 1017 | 2018 | 80 | NOTCH2                                         |

|      |      |    |                                |
|------|------|----|--------------------------------|
| 1017 | 2018 | 80 | NOTCH3                         |
| 1017 | 2018 | 80 | NOTCH4                         |
| 1017 | 2018 | 80 | Nucleophosmin (NPM1)           |
| 1017 | 2018 | 80 | NRAS                           |
| 1017 | 2018 | 80 | NSD1                           |
| 1017 | 2018 | 80 | NTRK1                          |
| 1017 | 2018 | 80 | NTRK2                          |
| 1017 | 2018 | 80 | NTRK3                          |
| 1017 | 2018 | 80 | NUP93                          |
| 1017 | 2018 | 80 | PAK3                           |
| 1017 | 2018 | 80 | PAK7                           |
| 1017 | 2018 | 80 | PALB2                          |
| 1017 | 2018 | 80 | PARP1                          |
| 1017 | 2018 | 80 | PARP2                          |
| 1017 | 2018 | 80 | PARP3                          |
| 1017 | 2018 | 80 | PARP4                          |
| 1017 | 2018 | 80 | PAX5                           |
| 1017 | 2018 | 80 | PBRM1                          |
| 1017 | 2018 | 80 | PDGFRA                         |
| 1017 | 2018 | 80 | PDGFRB                         |
| 1017 | 2018 | 80 | PDK1                           |
| 1017 | 2018 | 80 | PIK3C2G                        |
| 1017 | 2018 | 80 | PIK3C3                         |
| 1017 | 2018 | 80 | PIK3CG                         |
| 1017 | 2018 | 80 | PIK3R1                         |
| 1017 | 2018 | 80 | PIK3R2                         |
| 1017 | 2018 | 80 | PMS2                           |
| 1017 | 2018 | 80 | PNRC1                          |
| 1017 | 2018 | 80 | PPP2R1A                        |
| 1017 | 2018 | 80 | PRDM1                          |
| 1017 | 2018 | 80 | PRKAR1A                        |
| 1017 | 2018 | 80 | PRKDC                          |
| 1017 | 2018 | 80 | PRSS8                          |
| 1017 | 2018 | 80 | PTCH1                          |
| 1017 | 2018 | 80 | Phosphatase and Tensin homolog |
| 1017 | 2018 | 80 | PTPN11                         |
| 1017 | 2018 | 80 | RAD50                          |
| 1017 | 2018 | 80 | RAD51                          |
| 1017 | 2018 | 80 | RAD51B                         |
| 1017 | 2018 | 80 | RAD51C                         |

|      |      |    |             |
|------|------|----|-------------|
| 1017 | 2018 | 80 | RAD51D      |
| 1017 | 2018 | 80 | RAD52       |
| 1017 | 2018 | 80 | RAD54L      |
| 1017 | 2018 | 80 | RAF1        |
| 1017 | 2018 | 80 | RARA        |
| 1017 | 2018 | 80 | 13q14(RB1)V |
| 1017 | 2018 | 80 | REL         |
| 1017 | 2018 | 80 | RET         |
| 1017 | 2018 | 80 | RICTOR      |
| 1017 | 2018 | 80 | RNF43       |
| 1017 | 2018 | 80 | ROS1        |
| 1017 | 2018 | 80 | RPA1        |
| 1017 | 2018 | 80 | RPTOR       |
| 1017 | 2018 | 80 | RUNX1       |
| 1017 | 2018 | 80 | RUNX1T1     |
| 1017 | 2018 | 80 | SETD2       |
| 1017 | 2018 | 80 | SF3B1       |
| 1017 | 2018 | 80 | SH2B3       |
| 1017 | 2018 | 80 | SMAD2       |
| 1017 | 2018 | 80 | SMAD4       |
| 1017 | 2018 | 80 | SMARCA4     |
| 1017 | 2018 | 80 | SMARCB1     |
| 1017 | 2018 | 80 | SMARCD1     |
| 1017 | 2018 | 80 | SMO         |
| 1017 | 2018 | 80 | SOCS1       |
| 1017 | 2018 | 80 | SOX10       |
| 1017 | 2018 | 80 | SOX2        |
| 1017 | 2018 | 80 | SPEN        |
| 1017 | 2018 | 80 | SPOP        |
| 1017 | 2018 | 80 | SRC         |
| 1017 | 2018 | 80 | STAG2       |
| 1017 | 2018 | 80 | STAT4       |
| 1017 | 2018 | 80 | STK11       |
| 1017 | 2018 | 80 | SUFU        |
| 1017 | 2018 | 80 | SYK         |
| 1017 | 2018 | 80 | TBX3        |
| 1017 | 2018 | 80 | TET2        |
| 1017 | 2018 | 80 | TGFBR2      |
| 1017 | 2018 | 80 | TIPARP      |
| 1017 | 2018 | 80 | TMPRSS2     |

|      |      |    |                                   |
|------|------|----|-----------------------------------|
| 1017 | 2018 | 80 | TNFAIP3                           |
| 1017 | 2018 | 80 | TNFRSF14                          |
| 1017 | 2018 | 80 | TOP1                              |
| 1017 | 2018 | 80 | TP53                              |
| 1017 | 2018 | 80 | TRRAP                             |
| 1017 | 2018 | 80 | Tuberous sclerosis complex 1 gene |
| 1017 | 2018 | 80 | Tuberous sclerosis complex 2 gene |
| 1017 | 2018 | 80 | TSHR                              |
| 1017 | 2018 | 80 | Von Hippel-Lindau                 |
| 1017 | 2018 | 80 | WISP3                             |
| 1017 | 2018 | 80 | WT1                               |
| 1017 | 2018 | 80 | XPO1                              |
| 1017 | 2018 | 80 | XRCC3                             |
| 1017 | 2018 | 80 | ZNF217                            |
| 1017 | 2018 | 80 | ZNF703                            |
| 1018 | 2019 | 40 | ABL1                              |
| 1018 | 2019 | 40 | AKT1                              |
| 1018 | 2019 | 40 | AKT2                              |
| 1018 | 2019 | 40 | AKT3                              |
| 1018 | 2019 | 40 | ALK                               |
| 1018 | 2019 | 40 | ALOX12B                           |
| 1018 | 2019 | 40 | APC                               |
| 1018 | 2019 | 40 | APCDD1                            |
| 1018 | 2019 | 40 | AR                                |
| 1018 | 2019 | 40 | ARAF                              |
| 1018 | 2019 | 40 | ARFRP1                            |
| 1018 | 2019 | 40 | ARID1A                            |
| 1018 | 2019 | 40 | ARID2                             |
| 1018 | 2019 | 40 | ASXL1                             |
| 1018 | 2019 | 40 | ATM                               |
| 1018 | 2019 | 40 | ATR                               |
| 1018 | 2019 | 40 | ATRX                              |
| 1018 | 2019 | 40 | AURKA                             |
| 1018 | 2019 | 40 | AURKB                             |
| 1018 | 2019 | 40 | AXL                               |
| 1018 | 2019 | 40 | BACH1                             |
| 1018 | 2019 | 40 | BAP1                              |
| 1018 | 2019 | 40 | BARD1                             |
| 1018 | 2019 | 40 | BCL-2                             |

|      |      |    |                                       |
|------|------|----|---------------------------------------|
| 1018 | 2019 | 40 | BCL2L2                                |
| 1018 | 2019 | 40 | BCL6                                  |
| 1018 | 2019 | 40 | BCOR                                  |
| 1018 | 2019 | 40 | BCORL1                                |
| 1018 | 2019 | 40 | BCR                                   |
| 1018 | 2019 | 40 | BLM                                   |
| 1018 | 2019 | 40 | BRAF                                  |
| 1018 | 2019 | 40 | BRCA1                                 |
| 1018 | 2019 | 40 | BRCA2                                 |
| 1018 | 2019 | 40 | BRIP1                                 |
| 1018 | 2019 | 40 | BTG1                                  |
| 1018 | 2019 | 40 | BTK                                   |
| 1018 | 2019 | 40 | C17orf39                              |
| 1018 | 2019 | 40 | CARD11                                |
| 1018 | 2019 | 40 | CASP8                                 |
| 1018 | 2019 | 40 | CBFB                                  |
| 1018 | 2019 | 40 | CBL                                   |
| 1018 | 2019 | 40 | CCND2                                 |
| 1018 | 2019 | 40 | CCND3                                 |
| 1018 | 2019 | 40 | CCNE1                                 |
| 1018 | 2019 | 40 | CD79A                                 |
| 1018 | 2019 | 40 | CD79B                                 |
| 1018 | 2019 | 40 | CDC73                                 |
| 1018 | 2019 | 40 | CDH1                                  |
| 1018 | 2019 | 40 | CDK12                                 |
| 1018 | 2019 | 40 | Cyclin dependent kinase-4             |
| 1018 | 2019 | 40 | CDK6                                  |
| 1018 | 2019 | 40 | CDK8                                  |
| 1018 | 2019 | 40 | CDKN1B                                |
| 1018 | 2019 | 40 | CDKN2A                                |
| 1018 | 2019 | 40 | CDKN2B                                |
| 1018 | 2019 | 40 | CDKN2C                                |
| 1018 | 2019 | 40 | CCAT/enhancer binding protein (CEBPA) |
| 1018 | 2019 | 40 | CHEK1                                 |
| 1018 | 2019 | 40 | CHEK2                                 |
| 1018 | 2019 | 40 | CHUK                                  |
| 1018 | 2019 | 40 | CIC                                   |
| 1018 | 2019 | 40 | CRBN                                  |
| 1018 | 2019 | 40 | CREBBP                                |
| 1018 | 2019 | 40 | CRKL                                  |

|      |      |    |                                  |
|------|------|----|----------------------------------|
| 1018 | 2019 | 40 | CRLF2                            |
| 1018 | 2019 | 40 | CSF1R                            |
| 1018 | 2019 | 40 | CTCF                             |
| 1018 | 2019 | 40 | CTNNA1                           |
| 1018 | 2019 | 40 | CTNNB1                           |
| 1018 | 2019 | 40 | CUL4A                            |
| 1018 | 2019 | 40 | CUL4B                            |
| 1018 | 2019 | 40 | CYP17A1                          |
| 1018 | 2019 | 40 | DAXX                             |
| 1018 | 2019 | 40 | DDR2                             |
| 1018 | 2019 | 40 | DIS3                             |
| 1018 | 2019 | 40 | DNMT3A                           |
| 1018 | 2019 | 40 | DOT1L                            |
| 1018 | 2019 | 40 | Epidermal Growth Factor Receptor |
| 1018 | 2019 | 40 | EMSY                             |
| 1018 | 2019 | 40 | EP300                            |
| 1018 | 2019 | 40 | EPHA3                            |
| 1018 | 2019 | 40 | EPHA5                            |
| 1018 | 2019 | 40 | EPHB1                            |
| 1018 | 2019 | 40 | ERBB2                            |
| 1018 | 2019 | 40 | ERBB3                            |
| 1018 | 2019 | 40 | ERBB4                            |
| 1018 | 2019 | 40 | ERG                              |
| 1018 | 2019 | 40 | Estrogen receptor 1              |
| 1018 | 2019 | 40 | ETV1                             |
| 1018 | 2019 | 40 | ETV4                             |
| 1018 | 2019 | 40 | ETV5                             |
| 1018 | 2019 | 40 | ETV6                             |
| 1018 | 2019 | 40 | EWSR1                            |
| 1018 | 2019 | 40 | EZH2                             |
| 1018 | 2019 | 40 | FAM123B(WTX)                     |
| 1018 | 2019 | 40 | FAM46C                           |
| 1018 | 2019 | 40 | FANCA                            |
| 1018 | 2019 | 40 | FANCC                            |
| 1018 | 2019 | 40 | FANCD2                           |
| 1018 | 2019 | 40 | FANCE                            |
| 1018 | 2019 | 40 | FANCF                            |
| 1018 | 2019 | 40 | FANCG                            |
| 1018 | 2019 | 40 | FANCI                            |
| 1018 | 2019 | 40 | FANCL                            |

|      |      |    |                                                  |
|------|------|----|--------------------------------------------------|
| 1018 | 2019 | 40 | FANCM                                            |
| 1018 | 2019 | 40 | FAT3                                             |
| 1018 | 2019 | 40 | FBXW7                                            |
| 1018 | 2019 | 40 | FGF10                                            |
| 1018 | 2019 | 40 | FGF12                                            |
| 1018 | 2019 | 40 | FGF14                                            |
| 1018 | 2019 | 40 | Fibroblast growth factor 23                      |
| 1018 | 2019 | 40 | FGF6                                             |
| 1018 | 2019 | 40 | FGF7                                             |
| 1018 | 2019 | 40 | Fibroblast growth receptor 1                     |
| 1018 | 2019 | 40 | Fibroblast growth receptor 2                     |
| 1018 | 2019 | 40 | Fibroblast growth receptor 3                     |
| 1018 | 2019 | 40 | Fibroblast growth receptor 4                     |
| 1018 | 2019 | 40 | FLT1                                             |
| 1018 | 2019 | 40 | Fms-like tyrosine kinase 3 (FLT3)                |
| 1018 | 2019 | 40 | FLT4                                             |
| 1018 | 2019 | 40 | FOXL2                                            |
| 1018 | 2019 | 40 | GATA1                                            |
| 1018 | 2019 | 40 | GATA2                                            |
| 1018 | 2019 | 40 | GNA11                                            |
| 1018 | 2019 | 40 | GNA13                                            |
| 1018 | 2019 | 40 | GNAQ                                             |
| 1018 | 2019 | 40 | GNAS                                             |
| 1018 | 2019 | 40 | GPR124                                           |
| 1018 | 2019 | 40 | GRIN2A                                           |
| 1018 | 2019 | 40 | GSK3B                                            |
| 1018 | 2019 | 40 | Hepatocyte growth factor                         |
| 1018 | 2019 | 40 | HLA-A                                            |
| 1018 | 2019 | 40 | HRAS                                             |
| 1018 | 2019 | 40 | IDH1                                             |
| 1018 | 2019 | 40 | IDH2                                             |
| 1018 | 2019 | 40 | Insulin-like growth factor 1                     |
| 1018 | 2019 | 40 | Insulin growth factor 1 receptor                 |
| 1018 | 2019 | 40 | Insulin-like growth factor 2, also somatomedin A |
| 1018 | 2019 | 40 | IKBKE                                            |
| 1018 | 2019 | 40 | IKZF1                                            |
| 1018 | 2019 | 40 | IL7R                                             |
| 1018 | 2019 | 40 | INHBA                                            |
| 1018 | 2019 | 40 | IRF4                                             |
| 1018 | 2019 | 40 | IRS2                                             |



|      |      |    |                                                |
|------|------|----|------------------------------------------------|
| 1018 | 2019 | 40 | JAK1                                           |
| 1018 | 2019 | 40 | JAK2                                           |
| 1018 | 2019 | 40 | JAK3                                           |
| 1018 | 2019 | 40 | JUN                                            |
| 1018 | 2019 | 40 | KDM5A                                          |
| 1018 | 2019 | 40 | KDM5C                                          |
| 1018 | 2019 | 40 | KDM6A                                          |
| 1018 | 2019 | 40 | KDR                                            |
| 1018 | 2019 | 40 | KEAP1                                          |
| 1018 | 2019 | 40 | KIT                                            |
| 1018 | 2019 | 40 | KLHL6                                          |
| 1018 | 2019 | 40 | KRAS                                           |
| 1018 | 2019 | 40 | LMO1                                           |
| 1018 | 2019 | 40 | LRP1B                                          |
| 1018 | 2019 | 40 | MAP2K1                                         |
| 1018 | 2019 | 40 | MAP2K2                                         |
| 1018 | 2019 | 40 | MAP2K4                                         |
| 1018 | 2019 | 40 | MAP3K1                                         |
| 1018 | 2019 | 40 | MAP3K13                                        |
| 1018 | 2019 | 40 | MCL1                                           |
| 1018 | 2019 | 40 | MDM2                                           |
| 1018 | 2019 | 40 | MDM4                                           |
| 1018 | 2019 | 40 | MED12                                          |
| 1018 | 2019 | 40 | MEF2B                                          |
| 1018 | 2019 | 40 | MEN1                                           |
| 1018 | 2019 | 40 | MET                                            |
| 1018 | 2019 | 40 | Microphthalmia associated transcription factor |
| 1018 | 2019 | 40 | MLH1                                           |
| 1018 | 2019 | 40 | MLL                                            |
| 1018 | 2019 | 40 | MLL2                                           |
| 1018 | 2019 | 40 | MPL                                            |
| 1018 | 2019 | 40 | MRE11A                                         |
| 1018 | 2019 | 40 | MSH2                                           |
| 1018 | 2019 | 40 | MSH6                                           |
| 1018 | 2019 | 40 | MTOR                                           |
| 1018 | 2019 | 40 | MUTYH                                          |
| 1018 | 2019 | 40 | MYC                                            |
| 1018 | 2019 | 40 | MYCL1                                          |
| 1018 | 2019 | 40 | MYCN                                           |
| 1018 | 2019 | 40 | MYD88                                          |

|      |      |    |                      |
|------|------|----|----------------------|
| 1018 | 2019 | 40 | MYST3                |
| 1018 | 2019 | 40 | NBN                  |
| 1018 | 2019 | 40 | NCOR1                |
| 1018 | 2019 | 40 | NF1                  |
| 1018 | 2019 | 40 | NF2                  |
| 1018 | 2019 | 40 | NFE2L2               |
| 1018 | 2019 | 40 | NFKBIA               |
| 1018 | 2019 | 40 | NKX2-1               |
| 1018 | 2019 | 40 | NOTCH1               |
| 1018 | 2019 | 40 | NOTCH2               |
| 1018 | 2019 | 40 | NOTCH3               |
| 1018 | 2019 | 40 | NOTCH4               |
| 1018 | 2019 | 40 | Nucleophosmin (NPM1) |
| 1018 | 2019 | 40 | NRAS                 |
| 1018 | 2019 | 40 | NSD1                 |
| 1018 | 2019 | 40 | NTRK1                |
| 1018 | 2019 | 40 | NTRK2                |
| 1018 | 2019 | 40 | NTRK3                |
| 1018 | 2019 | 40 | NUP93                |
| 1018 | 2019 | 40 | PAK3                 |
| 1018 | 2019 | 40 | PAK7                 |
| 1018 | 2019 | 40 | PALB2                |
| 1018 | 2019 | 40 | PARP1                |
| 1018 | 2019 | 40 | PARP2                |
| 1018 | 2019 | 40 | PARP3                |
| 1018 | 2019 | 40 | PARP4                |
| 1018 | 2019 | 40 | PAX5                 |
| 1018 | 2019 | 40 | PBRM1                |
| 1018 | 2019 | 40 | PDGFRA               |
| 1018 | 2019 | 40 | PDGFRB               |
| 1018 | 2019 | 40 | PDK1                 |
| 1018 | 2019 | 40 | PIK3C2G              |
| 1018 | 2019 | 40 | PIK3C3               |
| 1018 | 2019 | 40 | <i>PIK3CA</i>        |
| 1018 | 2019 | 40 | PIK3CG               |
| 1018 | 2019 | 40 | PIK3R1               |
| 1018 | 2019 | 40 | PIK3R2               |
| 1018 | 2019 | 40 | PMS2                 |
| 1018 | 2019 | 40 | PNRC1                |
| 1018 | 2019 | 40 | PPP2R1A              |

|      |      |    |                                |
|------|------|----|--------------------------------|
| 1018 | 2019 | 40 | PRDM1                          |
| 1018 | 2019 | 40 | PRKAR1A                        |
| 1018 | 2019 | 40 | PRKDC                          |
| 1018 | 2019 | 40 | PRSS8                          |
| 1018 | 2019 | 40 | PTCH1                          |
| 1018 | 2019 | 40 | Phosphatase and Tensin homolog |
| 1018 | 2019 | 40 | PTPN11                         |
| 1018 | 2019 | 40 | RAD50                          |
| 1018 | 2019 | 40 | RAD51                          |
| 1018 | 2019 | 40 | RAD51B                         |
| 1018 | 2019 | 40 | RAD51C                         |
| 1018 | 2019 | 40 | RAD51D                         |
| 1018 | 2019 | 40 | RAD52                          |
| 1018 | 2019 | 40 | RAD54L                         |
| 1018 | 2019 | 40 | RAF1                           |
| 1018 | 2019 | 40 | RARA                           |
| 1018 | 2019 | 40 | 13q14(RB1)V                    |
| 1018 | 2019 | 40 | REL                            |
| 1018 | 2019 | 40 | RET                            |
| 1018 | 2019 | 40 | RICTOR                         |
| 1018 | 2019 | 40 | RNF43                          |
| 1018 | 2019 | 40 | ROS1                           |
| 1018 | 2019 | 40 | RPA1                           |
| 1018 | 2019 | 40 | RPTOR                          |
| 1018 | 2019 | 40 | RUNX1                          |
| 1018 | 2019 | 40 | RUNX1T1                        |
| 1018 | 2019 | 40 | SETD2                          |
| 1018 | 2019 | 40 | SF3B1                          |
| 1018 | 2019 | 40 | SH2B3                          |
| 1018 | 2019 | 40 | SMAD2                          |
| 1018 | 2019 | 40 | SMAD4                          |
| 1018 | 2019 | 40 | SMARCA4                        |
| 1018 | 2019 | 40 | SMARCB1                        |
| 1018 | 2019 | 40 | SMARCD1                        |
| 1018 | 2019 | 40 | SMO                            |
| 1018 | 2019 | 40 | SOCS1                          |
| 1018 | 2019 | 40 | SOX10                          |
| 1018 | 2019 | 40 | SOX2                           |
| 1018 | 2019 | 40 | SPEN                           |
| 1018 | 2019 | 40 | SPOP                           |

|      |      |    |                                   |
|------|------|----|-----------------------------------|
| 1018 | 2019 | 40 | SRC                               |
| 1018 | 2019 | 40 | STAT4                             |
| 1018 | 2019 | 40 | STK11                             |
| 1018 | 2019 | 40 | SUFU                              |
| 1018 | 2019 | 40 | SYK                               |
| 1018 | 2019 | 40 | TBX3                              |
| 1018 | 2019 | 40 | TET2                              |
| 1018 | 2019 | 40 | TGFBR2                            |
| 1018 | 2019 | 40 | TIPARP                            |
| 1018 | 2019 | 40 | TMPRSS2                           |
| 1018 | 2019 | 40 | TNFAIP3                           |
| 1018 | 2019 | 40 | TNFRSF14                          |
| 1018 | 2019 | 40 | TOP1                              |
| 1018 | 2019 | 40 | TP53                              |
| 1018 | 2019 | 40 | TRRAP                             |
| 1018 | 2019 | 40 | Tuberous sclerosis complex 1 gene |
| 1018 | 2019 | 40 | Tuberous sclerosis complex 2 gene |
| 1018 | 2019 | 40 | TSHR                              |
| 1018 | 2019 | 40 | Von Hippel-Lindau                 |
| 1018 | 2019 | 40 | WISP3                             |
| 1018 | 2019 | 40 | WT1                               |
| 1018 | 2019 | 40 | XPO1                              |
| 1018 | 2019 | 40 | XRCC3                             |
| 1018 | 2019 | 40 | ZNF217                            |
| 1018 | 2019 | 40 | ZNF703                            |
| 1019 | 2020 | 30 | ABL1                              |
| 1019 | 2020 | 30 | AKT1                              |
| 1019 | 2020 | 30 | AKT2                              |
| 1019 | 2020 | 30 | ALK                               |
| 1019 | 2020 | 30 | ALOX12B                           |
| 1019 | 2020 | 30 | APC                               |
| 1019 | 2020 | 30 | APCDD1                            |
| 1019 | 2020 | 30 | AR                                |
| 1019 | 2020 | 30 | ARAF                              |
| 1019 | 2020 | 30 | ARFRP1                            |
| 1019 | 2020 | 30 | ARID1A                            |
| 1019 | 2020 | 30 | ARID2                             |
| 1019 | 2020 | 30 | ASXL1                             |
| 1019 | 2020 | 30 | ATM                               |

|      |      |    |                           |
|------|------|----|---------------------------|
| 1019 | 2020 | 30 | ATR                       |
| 1019 | 2020 | 30 | ATRX                      |
| 1019 | 2020 | 30 | AURKA                     |
| 1019 | 2020 | 30 | AURKB                     |
| 1019 | 2020 | 30 | AXL                       |
| 1019 | 2020 | 30 | BACH1                     |
| 1019 | 2020 | 30 | BAP1                      |
| 1019 | 2020 | 30 | BARD1                     |
| 1019 | 2020 | 30 | BCL-2                     |
| 1019 | 2020 | 30 | BCL2L2                    |
| 1019 | 2020 | 30 | BCL6                      |
| 1019 | 2020 | 30 | BCOR                      |
| 1019 | 2020 | 30 | BCORL1                    |
| 1019 | 2020 | 30 | BCR                       |
| 1019 | 2020 | 30 | BLM                       |
| 1019 | 2020 | 30 | BRAF                      |
| 1019 | 2020 | 30 | BRCA1                     |
| 1019 | 2020 | 30 | BRCA2                     |
| 1019 | 2020 | 30 | BRIP1                     |
| 1019 | 2020 | 30 | BTG1                      |
| 1019 | 2020 | 30 | BTK                       |
| 1019 | 2020 | 30 | C17orf39                  |
| 1019 | 2020 | 30 | CARD11                    |
| 1019 | 2020 | 30 | CASP8                     |
| 1019 | 2020 | 30 | CBFB                      |
| 1019 | 2020 | 30 | CBL                       |
| 1019 | 2020 | 30 | CCND1                     |
| 1019 | 2020 | 30 | CCND2                     |
| 1019 | 2020 | 30 | CCND3                     |
| 1019 | 2020 | 30 | CCNE1                     |
| 1019 | 2020 | 30 | CD79A                     |
| 1019 | 2020 | 30 | CD79B                     |
| 1019 | 2020 | 30 | CDC73                     |
| 1019 | 2020 | 30 | CDH1                      |
| 1019 | 2020 | 30 | CDK12                     |
| 1019 | 2020 | 30 | Cyclin dependent kinase-4 |
| 1019 | 2020 | 30 | CDK6                      |
| 1019 | 2020 | 30 | CDK8                      |
| 1019 | 2020 | 30 | CDKN1B                    |
| 1019 | 2020 | 30 | CDKN2A                    |

|      |      |    |                                       |
|------|------|----|---------------------------------------|
| 1019 | 2020 | 30 | CDKN2B                                |
| 1019 | 2020 | 30 | CDKN2C                                |
| 1019 | 2020 | 30 | CCAT/enhancer binding protein (CEBPA) |
| 1019 | 2020 | 30 | CHEK1                                 |
| 1019 | 2020 | 30 | CHUK                                  |
| 1019 | 2020 | 30 | CIC                                   |
| 1019 | 2020 | 30 | CRBN                                  |
| 1019 | 2020 | 30 | CRKL                                  |
| 1019 | 2020 | 30 | CRLF2                                 |
| 1019 | 2020 | 30 | CSF1R                                 |
| 1019 | 2020 | 30 | CTCF                                  |
| 1019 | 2020 | 30 | CTNNA1                                |
| 1019 | 2020 | 30 | CTNNB1                                |
| 1019 | 2020 | 30 | CUL4A                                 |
| 1019 | 2020 | 30 | CUL4B                                 |
| 1019 | 2020 | 30 | CYP17A1                               |
| 1019 | 2020 | 30 | DAXX                                  |
| 1019 | 2020 | 30 | DDR2                                  |
| 1019 | 2020 | 30 | DIS3                                  |
| 1019 | 2020 | 30 | DNMT3A                                |
| 1019 | 2020 | 30 | DOT1L                                 |
| 1019 | 2020 | 30 | Epidermal Growth Factor Receptor      |
| 1019 | 2020 | 30 | EMSY                                  |
| 1019 | 2020 | 30 | EP300                                 |
| 1019 | 2020 | 30 | EPHA3                                 |
| 1019 | 2020 | 30 | EPHA5                                 |
| 1019 | 2020 | 30 | EPHB1                                 |
| 1019 | 2020 | 30 | ERBB2                                 |
| 1019 | 2020 | 30 | ERBB3                                 |
| 1019 | 2020 | 30 | ERBB4                                 |
| 1019 | 2020 | 30 | ERG                                   |
| 1019 | 2020 | 30 | Estrogen receptor 1                   |
| 1019 | 2020 | 30 | ETV1                                  |
| 1019 | 2020 | 30 | ETV4                                  |
| 1019 | 2020 | 30 | ETV5                                  |
| 1019 | 2020 | 30 | ETV6                                  |
| 1019 | 2020 | 30 | EWSR1                                 |
| 1019 | 2020 | 30 | EZH2                                  |
| 1019 | 2020 | 30 | FAM123B(WTX)                          |

|      |      |    |                                   |
|------|------|----|-----------------------------------|
| 1019 | 2020 | 30 | FAM46C                            |
| 1019 | 2020 | 30 | FANCA                             |
| 1019 | 2020 | 30 | FANCC                             |
| 1019 | 2020 | 30 | FANCD2                            |
| 1019 | 2020 | 30 | FANCE                             |
| 1019 | 2020 | 30 | FANCF                             |
| 1019 | 2020 | 30 | FANCG                             |
| 1019 | 2020 | 30 | FANCI                             |
| 1019 | 2020 | 30 | FANCL                             |
| 1019 | 2020 | 30 | FANCM                             |
| 1019 | 2020 | 30 | FAT3                              |
| 1019 | 2020 | 30 | FBXW7                             |
| 1019 | 2020 | 30 | FGF10                             |
| 1019 | 2020 | 30 | FGF12                             |
| 1019 | 2020 | 30 | FGF14                             |
| 1019 | 2020 | 30 | Fibroblast growth factor 19       |
| 1019 | 2020 | 30 | Fibroblast growth factor 23       |
| 1019 | 2020 | 30 | Fibroblast growth factor 3        |
| 1019 | 2020 | 30 | FGF4                              |
| 1019 | 2020 | 30 | FGF6                              |
| 1019 | 2020 | 30 | FGF7                              |
| 1019 | 2020 | 30 | Fibroblast growth receptor 1      |
| 1019 | 2020 | 30 | Fibroblast growth receptor 2      |
| 1019 | 2020 | 30 | Fibroblast growth receptor 3      |
| 1019 | 2020 | 30 | Fibroblast growth receptor 4      |
| 1019 | 2020 | 30 | FLT1                              |
| 1019 | 2020 | 30 | Fms-like tyrosine kinase 3 (FLT3) |
| 1019 | 2020 | 30 | FLT4                              |
| 1019 | 2020 | 30 | FOXL2                             |
| 1019 | 2020 | 30 | GATA1                             |
| 1019 | 2020 | 30 | GATA2                             |
| 1019 | 2020 | 30 | GATA3                             |
| 1019 | 2020 | 30 | GNA11                             |
| 1019 | 2020 | 30 | GNA13                             |
| 1019 | 2020 | 30 | GNAQ                              |
| 1019 | 2020 | 30 | GNAS                              |
| 1019 | 2020 | 30 | GPR124                            |
| 1019 | 2020 | 30 | GRIN2A                            |
| 1019 | 2020 | 30 | GSK3B                             |
| 1019 | 2020 | 30 | Hepatocyte growth factor          |

|      |      |    |                                                  |
|------|------|----|--------------------------------------------------|
| 1019 | 2020 | 30 | HLA-A                                            |
| 1019 | 2020 | 30 | HRAS                                             |
| 1019 | 2020 | 30 | IDH1                                             |
| 1019 | 2020 | 30 | IDH2                                             |
| 1019 | 2020 | 30 | Insulin-like growth factor 1                     |
| 1019 | 2020 | 30 | Insulin growth factor 1 receptor                 |
| 1019 | 2020 | 30 | Insulin-like growth factor 2, also somatomedin A |
| 1019 | 2020 | 30 | IKBKE                                            |
| 1019 | 2020 | 30 | IKZF1                                            |
| 1019 | 2020 | 30 | IL7R                                             |
| 1019 | 2020 | 30 | INHBA                                            |
| 1019 | 2020 | 30 | IRF4                                             |
| 1019 | 2020 | 30 | IRS2                                             |
| 1019 | 2020 | 30 | JAK1                                             |
| 1019 | 2020 | 30 | JAK2                                             |
| 1019 | 2020 | 30 | JAK3                                             |
| 1019 | 2020 | 30 | JUN                                              |
| 1019 | 2020 | 30 | KDM5A                                            |
| 1019 | 2020 | 30 | KDM5C                                            |
| 1019 | 2020 | 30 | KDM6A                                            |
| 1019 | 2020 | 30 | KDR                                              |
| 1019 | 2020 | 30 | KEAP1                                            |
| 1019 | 2020 | 30 | KIT                                              |
| 1019 | 2020 | 30 | KLHL6                                            |
| 1019 | 2020 | 30 | KRAS                                             |
| 1019 | 2020 | 30 | LMO1                                             |
| 1019 | 2020 | 30 | LRP1B                                            |
| 1019 | 2020 | 30 | MAP2K1                                           |
| 1019 | 2020 | 30 | MAP2K2                                           |
| 1019 | 2020 | 30 | MAP2K4                                           |
| 1019 | 2020 | 30 | MAP3K1                                           |
| 1019 | 2020 | 30 | MAP3K13                                          |
| 1019 | 2020 | 30 | MDM2                                             |
| 1019 | 2020 | 30 | MDM4                                             |
| 1019 | 2020 | 30 | MED12                                            |
| 1019 | 2020 | 30 | MEF2B                                            |
| 1019 | 2020 | 30 | MEN1                                             |
| 1019 | 2020 | 30 | MET                                              |
| 1019 | 2020 | 30 | Microphthalmia associated transcription factor   |



|      |      |    |                      |
|------|------|----|----------------------|
| 1019 | 2020 | 30 | MLH1                 |
| 1019 | 2020 | 30 | MLL                  |
| 1019 | 2020 | 30 | MLL2                 |
| 1019 | 2020 | 30 | MPL                  |
| 1019 | 2020 | 30 | MRE11A               |
| 1019 | 2020 | 30 | MSH2                 |
| 1019 | 2020 | 30 | MSH6                 |
| 1019 | 2020 | 30 | MTOR                 |
| 1019 | 2020 | 30 | MUTYH                |
| 1019 | 2020 | 30 | MYC                  |
| 1019 | 2020 | 30 | MYCL1                |
| 1019 | 2020 | 30 | MYCN                 |
| 1019 | 2020 | 30 | MYD88                |
| 1019 | 2020 | 30 | NBN                  |
| 1019 | 2020 | 30 | NCOR1                |
| 1019 | 2020 | 30 | NF1                  |
| 1019 | 2020 | 30 | NF2                  |
| 1019 | 2020 | 30 | NFE2L2               |
| 1019 | 2020 | 30 | NFKBIA               |
| 1019 | 2020 | 30 | NKX2-1               |
| 1019 | 2020 | 30 | NOTCH1               |
| 1019 | 2020 | 30 | NOTCH2               |
| 1019 | 2020 | 30 | NOTCH3               |
| 1019 | 2020 | 30 | NOTCH4               |
| 1019 | 2020 | 30 | Nucleophosmin (NPM1) |
| 1019 | 2020 | 30 | NRAS                 |
| 1019 | 2020 | 30 | NSD1                 |
| 1019 | 2020 | 30 | NTRK1                |
| 1019 | 2020 | 30 | NTRK2                |
| 1019 | 2020 | 30 | NTRK3                |
| 1019 | 2020 | 30 | NUP93                |
| 1019 | 2020 | 30 | PAK3                 |
| 1019 | 2020 | 30 | PAK7                 |
| 1019 | 2020 | 30 | PALB2                |
| 1019 | 2020 | 30 | PARP1                |
| 1019 | 2020 | 30 | PARP2                |
| 1019 | 2020 | 30 | PARP3                |
| 1019 | 2020 | 30 | PARP4                |
| 1019 | 2020 | 30 | PAX5                 |
| 1019 | 2020 | 30 | PBRM1                |

|      |      |    |               |
|------|------|----|---------------|
| 1019 | 2020 | 30 | PDGFRA        |
| 1019 | 2020 | 30 | PDGFRB        |
| 1019 | 2020 | 30 | PKD1          |
| 1019 | 2020 | 30 | PIK3C2G       |
| 1019 | 2020 | 30 | PIK3C3        |
| 1019 | 2020 | 30 | <i>PIK3CA</i> |
| 1019 | 2020 | 30 | PIK3CG        |
| 1019 | 2020 | 30 | PIK3R1        |
| 1019 | 2020 | 30 | PIK3R2        |
| 1019 | 2020 | 30 | PMS2          |
| 1019 | 2020 | 30 | PNRC1         |
| 1019 | 2020 | 30 | PPP2R1A       |
| 1019 | 2020 | 30 | PRDM1         |
| 1019 | 2020 | 30 | PRKAR1A       |
| 1019 | 2020 | 30 | PRKDC         |
| 1019 | 2020 | 30 | PRSS8         |
| 1019 | 2020 | 30 | PTCH1         |
| 1019 | 2020 | 30 | PTPN11        |
| 1019 | 2020 | 30 | RAD50         |
| 1019 | 2020 | 30 | RAD51         |
| 1019 | 2020 | 30 | RAD51B        |
| 1019 | 2020 | 30 | RAD51C        |
| 1019 | 2020 | 30 | RAD51D        |
| 1019 | 2020 | 30 | RAD52         |
| 1019 | 2020 | 30 | RAD54L        |
| 1019 | 2020 | 30 | RAF1          |
| 1019 | 2020 | 30 | RARA          |
| 1019 | 2020 | 30 | 13q14(RB1)V   |
| 1019 | 2020 | 30 | REL           |
| 1019 | 2020 | 30 | RET           |
| 1019 | 2020 | 30 | RICTOR        |
| 1019 | 2020 | 30 | RNF43         |
| 1019 | 2020 | 30 | ROS1          |
| 1019 | 2020 | 30 | RPA1          |
| 1019 | 2020 | 30 | RPTOR         |
| 1019 | 2020 | 30 | RUNX1         |
| 1019 | 2020 | 30 | RUNX1T1       |
| 1019 | 2020 | 30 | SETD2         |
| 1019 | 2020 | 30 | SF3B1         |
| 1019 | 2020 | 30 | SH2B3         |

|      |      |    |                                   |
|------|------|----|-----------------------------------|
| 1019 | 2020 | 30 | SMAD2                             |
| 1019 | 2020 | 30 | SMARCA4                           |
| 1019 | 2020 | 30 | SMARCB1                           |
| 1019 | 2020 | 30 | SMARCD1                           |
| 1019 | 2020 | 30 | SMO                               |
| 1019 | 2020 | 30 | SOCS1                             |
| 1019 | 2020 | 30 | SOX10                             |
| 1019 | 2020 | 30 | SOX2                              |
| 1019 | 2020 | 30 | SPEN                              |
| 1019 | 2020 | 30 | SPOP                              |
| 1019 | 2020 | 30 | SRC                               |
| 1019 | 2020 | 30 | STAG2                             |
| 1019 | 2020 | 30 | STAT4                             |
| 1019 | 2020 | 30 | STK11                             |
| 1019 | 2020 | 30 | SUFU                              |
| 1019 | 2020 | 30 | SYK                               |
| 1019 | 2020 | 30 | TBX3                              |
| 1019 | 2020 | 30 | TET2                              |
| 1019 | 2020 | 30 | TGFBR2                            |
| 1019 | 2020 | 30 | TIPARP                            |
| 1019 | 2020 | 30 | TMPRSS2                           |
| 1019 | 2020 | 30 | TNFAIP3                           |
| 1019 | 2020 | 30 | TNFRSF14                          |
| 1019 | 2020 | 30 | TOP1                              |
| 1019 | 2020 | 30 | TRRAP                             |
| 1019 | 2020 | 30 | Tuberous sclerosis complex 1 gene |
| 1019 | 2020 | 30 | Tuberous sclerosis complex 2 gene |
| 1019 | 2020 | 30 | TSHR                              |
| 1019 | 2020 | 30 | Von Hippel-Lindau                 |
| 1019 | 2020 | 30 | WISP3                             |
| 1019 | 2020 | 30 | WT1                               |
| 1019 | 2020 | 30 | XPO1                              |
| 1019 | 2020 | 30 | XRCC3                             |
| 1019 | 2020 | 30 | ZNF217                            |
| 1019 | 2020 | 30 | ZNF703                            |
| 1019 |      | 30 | SMAD4                             |
| 1020 |      | 50 | ABL1                              |
| 1020 |      | 50 | AKT1                              |
| 1020 |      | 50 | AKT2                              |

|      |  |    |          |
|------|--|----|----------|
| 1020 |  | 50 | AKT3     |
| 1020 |  | 50 | ALK      |
| 1020 |  | 50 | ALOX12B  |
| 1020 |  | 50 | APC      |
| 1020 |  | 50 | APCDD1   |
| 1020 |  | 50 | AR       |
| 1020 |  | 50 | ARAF     |
| 1020 |  | 50 | ARFRP1   |
| 1020 |  | 50 | ARID1A   |
| 1020 |  | 50 | ARID2    |
| 1020 |  | 50 | ASXL1    |
| 1020 |  | 50 | ATM      |
| 1020 |  | 50 | ATR      |
| 1020 |  | 50 | ATRX     |
| 1020 |  | 50 | AURKA    |
| 1020 |  | 50 | AURKB    |
| 1020 |  | 50 | AXL      |
| 1020 |  | 50 | BACH1    |
| 1020 |  | 50 | BAP1     |
| 1020 |  | 50 | BARD1    |
| 1020 |  | 50 | BCL-2    |
| 1020 |  | 50 | BCL2L2   |
| 1020 |  | 50 | BCL6     |
| 1020 |  | 50 | BCOR     |
| 1020 |  | 50 | BCORL1   |
| 1020 |  | 50 | BCR      |
| 1020 |  | 50 | BLM      |
| 1020 |  | 50 | BRAF     |
| 1020 |  | 50 | BRCA1    |
| 1020 |  | 50 | BRCA2    |
| 1020 |  | 50 | BRIP1    |
| 1020 |  | 50 | BTG1     |
| 1020 |  | 50 | BTK      |
| 1020 |  | 50 | C17orf39 |
| 1020 |  | 50 | CARD11   |
| 1020 |  | 50 | CASP8    |
| 1020 |  | 50 | CBFB     |
| 1020 |  | 50 | CBL      |
| 1020 |  | 50 | CCND1    |
| 1020 |  | 50 | CCND2    |

|      |  |    |                                       |
|------|--|----|---------------------------------------|
| 1020 |  | 50 | CCND3                                 |
| 1020 |  | 50 | CCNE1                                 |
| 1020 |  | 50 | CD79A                                 |
| 1020 |  | 50 | CD79B                                 |
| 1020 |  | 50 | CDC73                                 |
| 1020 |  | 50 | CDH1                                  |
| 1020 |  | 50 | CDK12                                 |
| 1020 |  | 50 | Cyclin dependent kinase-4             |
| 1020 |  | 50 | CDK6                                  |
| 1020 |  | 50 | CDK8                                  |
| 1020 |  | 50 | CDKN1B                                |
| 1020 |  | 50 | CDKN2A                                |
| 1020 |  | 50 | CDKN2B                                |
| 1020 |  | 50 | CDKN2C                                |
| 1020 |  | 50 | CCAT/enhancer binding protein (CEBPA) |
| 1020 |  | 50 | CHEK1                                 |
| 1020 |  | 50 | CHEK2                                 |
| 1020 |  | 50 | CHUK                                  |
| 1020 |  | 50 | CIC                                   |
| 1020 |  | 50 | CRBN                                  |
| 1020 |  | 50 | CRKL                                  |
| 1020 |  | 50 | CRLF2                                 |
| 1020 |  | 50 | CSF1R                                 |
| 1020 |  | 50 | CTCF                                  |
| 1020 |  | 50 | CTNNA1                                |
| 1020 |  | 50 | CTNNB1                                |
| 1020 |  | 50 | CUL4A                                 |
| 1020 |  | 50 | CUL4B                                 |
| 1020 |  | 50 | CYP17A1                               |
| 1020 |  | 50 | DAXX                                  |
| 1020 |  | 50 | DDR2                                  |
| 1020 |  | 50 | DIS3                                  |
| 1020 |  | 50 | DNMT3A                                |
| 1020 |  | 50 | DOT1L                                 |
| 1020 |  | 50 | Epidermal Growth Factor Receptor      |
| 1020 |  | 50 | EMSY                                  |
| 1020 |  | 50 | EP300                                 |
| 1020 |  | 50 | EPHA3                                 |
| 1020 |  | 50 | EPHA5                                 |

|      |  |    |                                   |
|------|--|----|-----------------------------------|
| 1020 |  | 50 | EPHB1                             |
| 1020 |  | 50 | ERBB2                             |
| 1020 |  | 50 | ERBB3                             |
| 1020 |  | 50 | ERBB4                             |
| 1020 |  | 50 | ERG                               |
| 1020 |  | 50 | Estrogen receptor 1               |
| 1020 |  | 50 | ETV1                              |
| 1020 |  | 50 | ETV4                              |
| 1020 |  | 50 | ETV5                              |
| 1020 |  | 50 | ETV6                              |
| 1020 |  | 50 | EWSR1                             |
| 1020 |  | 50 | EZH2                              |
| 1020 |  | 50 | FAM123B(WTX)                      |
| 1020 |  | 50 | FAM46C                            |
| 1020 |  | 50 | FANCA                             |
| 1020 |  | 50 | FANCC                             |
| 1020 |  | 50 | FANCD2                            |
| 1020 |  | 50 | FANCE                             |
| 1020 |  | 50 | FANCF                             |
| 1020 |  | 50 | FANCG                             |
| 1020 |  | 50 | FANCI                             |
| 1020 |  | 50 | FANCL                             |
| 1020 |  | 50 | FANCM                             |
| 1020 |  | 50 | FAT3                              |
| 1020 |  | 50 | FBXW7                             |
| 1020 |  | 50 | FGF10                             |
| 1020 |  | 50 | FGF12                             |
| 1020 |  | 50 | FGF14                             |
| 1020 |  | 50 | Fibroblast growth factor 19       |
| 1020 |  | 50 | Fibroblast growth factor 23       |
| 1020 |  | 50 | Fibroblast growth factor 3        |
| 1020 |  | 50 | FGF4                              |
| 1020 |  | 50 | FGF6                              |
| 1020 |  | 50 | FGF7                              |
| 1020 |  | 50 | Fibroblast growth receptor 1      |
| 1020 |  | 50 | Fibroblast growth receptor 2      |
| 1020 |  | 50 | Fibroblast growth receptor 3      |
| 1020 |  | 50 | Fibroblast growth receptor 4      |
| 1020 |  | 50 | FLT1                              |
| 1020 |  | 50 | Fms-like tyrosine kinase 3 (FLT3) |

|      |  |    |                                                  |
|------|--|----|--------------------------------------------------|
| 1020 |  | 50 | FLT4                                             |
| 1020 |  | 50 | FOXL2                                            |
| 1020 |  | 50 | GATA1                                            |
| 1020 |  | 50 | GATA2                                            |
| 1020 |  | 50 | GNA11                                            |
| 1020 |  | 50 | GNA13                                            |
| 1020 |  | 50 | GNAQ                                             |
| 1020 |  | 50 | GNAS                                             |
| 1020 |  | 50 | GPR124                                           |
| 1020 |  | 50 | GRIN2A                                           |
| 1020 |  | 50 | GSK3B                                            |
| 1020 |  | 50 | Hepatocyte growth factor                         |
| 1020 |  | 50 | HLA-A                                            |
| 1020 |  | 50 | HRAS                                             |
| 1020 |  | 50 | IDH1                                             |
| 1020 |  | 50 | IDH2                                             |
| 1020 |  | 50 | Insulin-like growth factor 1                     |
| 1020 |  | 50 | Insulin growth factor 1 receptor                 |
| 1020 |  | 50 | Insulin-like growth factor 2, also somatomedin A |
| 1020 |  | 50 | IKBKE                                            |
| 1020 |  | 50 | IKZF1                                            |
| 1020 |  | 50 | IL7R                                             |
| 1020 |  | 50 | INHBA                                            |
| 1020 |  | 50 | IRF4                                             |
| 1020 |  | 50 | IRS2                                             |
| 1020 |  | 50 | JAK1                                             |
| 1020 |  | 50 | JAK2                                             |
| 1020 |  | 50 | JAK3                                             |
| 1020 |  | 50 | JUN                                              |
| 1020 |  | 50 | KDM5A                                            |
| 1020 |  | 50 | KDM5C                                            |
| 1020 |  | 50 | KDM6A                                            |
| 1020 |  | 50 | KDR                                              |
| 1020 |  | 50 | KEAP1                                            |
| 1020 |  | 50 | KIT                                              |
| 1020 |  | 50 | KLHL6                                            |
| 1020 |  | 50 | KRAS                                             |
| 1020 |  | 50 | LMO1                                             |
| 1020 |  | 50 | LRP1B                                            |
| 1020 |  | 50 | MAP2K1                                           |

|      |  |    |                                                |
|------|--|----|------------------------------------------------|
| 1020 |  | 50 | MAP2K2                                         |
| 1020 |  | 50 | MAP2K4                                         |
| 1020 |  | 50 | MAP3K1                                         |
| 1020 |  | 50 | MAP3K13                                        |
| 1020 |  | 50 | MCL1                                           |
| 1020 |  | 50 | MDM2                                           |
| 1020 |  | 50 | MDM4                                           |
| 1020 |  | 50 | MED12                                          |
| 1020 |  | 50 | MEF2B                                          |
| 1020 |  | 50 | MEN1                                           |
| 1020 |  | 50 | MET                                            |
| 1020 |  | 50 | Microphthalmia associated transcription factor |
| 1020 |  | 50 | MLH1                                           |
| 1020 |  | 50 | MLL                                            |
| 1020 |  | 50 | MLL2                                           |
| 1020 |  | 50 | MPL                                            |
| 1020 |  | 50 | MRE11A                                         |
| 1020 |  | 50 | MSH2                                           |
| 1020 |  | 50 | MSH6                                           |
| 1020 |  | 50 | MTOR                                           |
| 1020 |  | 50 | MUTYH                                          |
| 1020 |  | 50 | MYCL1                                          |
| 1020 |  | 50 | MYCN                                           |
| 1020 |  | 50 | MYD88                                          |
| 1020 |  | 50 | MYST3                                          |
| 1020 |  | 50 | NBN                                            |
| 1020 |  | 50 | NCOR1                                          |
| 1020 |  | 50 | NF1                                            |
| 1020 |  | 50 | NF2                                            |
| 1020 |  | 50 | NFE2L2                                         |
| 1020 |  | 50 | NFKBIA                                         |
| 1020 |  | 50 | NKX2-1                                         |
| 1020 |  | 50 | NOTCH1                                         |
| 1020 |  | 50 | NOTCH2                                         |
| 1020 |  | 50 | NOTCH3                                         |
| 1020 |  | 50 | NOTCH4                                         |
| 1020 |  | 50 | Nucleophosmin (NPM1)                           |
| 1020 |  | 50 | NRAS                                           |
| 1020 |  | 50 | NSD1                                           |
| 1020 |  | 50 | NTRK1                                          |



|      |  |    |                                |
|------|--|----|--------------------------------|
| 1020 |  | 50 | NTRK2                          |
| 1020 |  | 50 | NTRK3                          |
| 1020 |  | 50 | NUP93                          |
| 1020 |  | 50 | PAK3                           |
| 1020 |  | 50 | PAK7                           |
| 1020 |  | 50 | PALB2                          |
| 1020 |  | 50 | PARP1                          |
| 1020 |  | 50 | PARP2                          |
| 1020 |  | 50 | PARP3                          |
| 1020 |  | 50 | PARP4                          |
| 1020 |  | 50 | PAX5                           |
| 1020 |  | 50 | PBRM1                          |
| 1020 |  | 50 | PDGFRA                         |
| 1020 |  | 50 | PDGFRB                         |
| 1020 |  | 50 | PDK1                           |
| 1020 |  | 50 | PIK3C2G                        |
| 1020 |  | 50 | PIK3C3                         |
| 1020 |  | 50 | <i>PIK3CA</i>                  |
| 1020 |  | 50 | PIK3CG                         |
| 1020 |  | 50 | PIK3R1                         |
| 1020 |  | 50 | PIK3R2                         |
| 1020 |  | 50 | PMS2                           |
| 1020 |  | 50 | PNRC1                          |
| 1020 |  | 50 | PPP2R1A                        |
| 1020 |  | 50 | PRDM1                          |
| 1020 |  | 50 | PRKAR1A                        |
| 1020 |  | 50 | PRKDC                          |
| 1020 |  | 50 | PRSS8                          |
| 1020 |  | 50 | PTCH1                          |
| 1020 |  | 50 | Phosphatase and tensin homolog |
| 1020 |  | 50 | PTPN11                         |
| 1020 |  | 50 | RAD50                          |
| 1020 |  | 50 | RAD51                          |
| 1020 |  | 50 | RAD51B                         |
| 1020 |  | 50 | RAD51C                         |
| 1020 |  | 50 | RAD51D                         |
| 1020 |  | 50 | RAD52                          |
| 1020 |  | 50 | RAD54L                         |
| 1020 |  | 50 | RAF1                           |
| 1020 |  | 50 | RARA                           |

|      |  |    |             |
|------|--|----|-------------|
| 1020 |  | 50 | 13q14(RB1)V |
| 1020 |  | 50 | REL         |
| 1020 |  | 50 | RET         |
| 1020 |  | 50 | RICTOR      |
| 1020 |  | 50 | RNF43       |
| 1020 |  | 50 | ROS1        |
| 1020 |  | 50 | RPA1        |
| 1020 |  | 50 | RPTOR       |
| 1020 |  | 50 | RUNX1       |
| 1020 |  | 50 | RUNX1T1     |
| 1020 |  | 50 | SETD2       |
| 1020 |  | 50 | SF3B1       |
| 1020 |  | 50 | SH2B3       |
| 1020 |  | 50 | SMAD2       |
| 1020 |  | 50 | SMAD4       |
| 1020 |  | 50 | SMARCA4     |
| 1020 |  | 50 | SMARCB1     |
| 1020 |  | 50 | SMARCD1     |
| 1020 |  | 50 | SMO         |
| 1020 |  | 50 | SOCS1       |
| 1020 |  | 50 | SOX10       |
| 1020 |  | 50 | SOX2        |
| 1020 |  | 50 | SPEN        |
| 1020 |  | 50 | SPOP        |
| 1020 |  | 50 | SRC         |
| 1020 |  | 50 | STAG2       |
| 1020 |  | 50 | STAT4       |
| 1020 |  | 50 | STK11       |
| 1020 |  | 50 | SUFU        |
| 1020 |  | 50 | SYK         |
| 1020 |  | 50 | TBX3        |
| 1020 |  | 50 | TET2        |
| 1020 |  | 50 | TGFBR2      |
| 1020 |  | 50 | TIPARP      |
| 1020 |  | 50 | TMPRSS2     |
| 1020 |  | 50 | TNFAIP3     |
| 1020 |  | 50 | TNFRSF14    |
| 1020 |  | 50 | TOP1        |
| 1020 |  | 50 | TP53        |
| 1020 |  | 50 | TRRAP       |

|      |      |    |                                   |
|------|------|----|-----------------------------------|
| 1020 |      | 50 | Tuberous sclerosis complex 1 gene |
| 1020 |      | 50 | Tuberous sclerosis complex 2 gene |
| 1020 |      | 50 | TSHR                              |
| 1020 |      | 50 | Von Hippel-Lindau                 |
| 1020 |      | 50 | WISP3                             |
| 1020 |      | 50 | WT1                               |
| 1020 |      | 50 | XPO1                              |
| 1020 |      | 50 | XRCC3                             |
| 1020 |      | 50 | ZNF703                            |
| 1020 |      | 50 | CREBBP                            |
| 1021 | 2022 | 50 | ABL1                              |
| 1021 | 2022 | 50 | AKT1                              |
| 1021 | 2022 | 50 | AKT2                              |
| 1021 | 2022 | 50 | AKT3                              |
| 1021 | 2022 | 50 | ALK                               |
| 1021 | 2022 | 50 | ALOX12B                           |
| 1021 | 2022 | 50 | APC                               |
| 1021 | 2022 | 50 | APCDD1                            |
| 1021 | 2022 | 50 | AR                                |
| 1021 | 2022 | 50 | ARAF                              |
| 1021 | 2022 | 50 | ARFRP1                            |
| 1021 | 2022 | 50 | ARID1A                            |
| 1021 | 2022 | 50 | ARID2                             |
| 1021 | 2022 | 50 | ASXL1                             |
| 1021 | 2022 | 50 | ATM                               |
| 1021 | 2022 | 50 | ATR                               |
| 1021 | 2022 | 50 | ATRX                              |
| 1021 | 2022 | 50 | AURKA                             |
| 1021 | 2022 | 50 | AURKB                             |
| 1021 | 2022 | 50 | AXL                               |
| 1021 | 2022 | 50 | BACH1                             |
| 1021 | 2022 | 50 | BAP1                              |
| 1021 | 2022 | 50 | BARD1                             |
| 1021 | 2022 | 50 | BCL-2                             |
| 1021 | 2022 | 50 | BCL2L2                            |
| 1021 | 2022 | 50 | BCL6                              |
| 1021 | 2022 | 50 | BCOR                              |
| 1021 | 2022 | 50 | BCORL1                            |
| 1021 | 2022 | 50 | BCR                               |

|      |      |    |                                       |
|------|------|----|---------------------------------------|
| 1021 | 2022 | 50 | BLM                                   |
| 1021 | 2022 | 50 | BRAF                                  |
| 1021 | 2022 | 50 | BRCA1                                 |
| 1021 | 2022 | 50 | BRCA2                                 |
| 1021 | 2022 | 50 | BRIP1                                 |
| 1021 | 2022 | 50 | BTG1                                  |
| 1021 | 2022 | 50 | BTK                                   |
| 1021 | 2022 | 50 | C17orf39                              |
| 1021 | 2022 | 50 | CARD11                                |
| 1021 | 2022 | 50 | CASP8                                 |
| 1021 | 2022 | 50 | CBFB                                  |
| 1021 | 2022 | 50 | CBL                                   |
| 1021 | 2022 | 50 | CCND1                                 |
| 1021 | 2022 | 50 | CCND2                                 |
| 1021 | 2022 | 50 | CCND3                                 |
| 1021 | 2022 | 50 | CCNE1                                 |
| 1021 | 2022 | 50 | CD79A                                 |
| 1021 | 2022 | 50 | CD79B                                 |
| 1021 | 2022 | 50 | CDC73                                 |
| 1021 | 2022 | 50 | CDH1                                  |
| 1021 | 2022 | 50 | CDK12                                 |
| 1021 | 2022 | 50 | Cyclin dependent kinase-4             |
| 1021 | 2022 | 50 | CDK6                                  |
| 1021 | 2022 | 50 | CDK8                                  |
| 1021 | 2022 | 50 | CDKN1B                                |
| 1021 | 2022 | 50 | CDKN2A                                |
| 1021 | 2022 | 50 | CDKN2B                                |
| 1021 | 2022 | 50 | CDKN2C                                |
| 1021 | 2022 | 50 | CCAT/enhancer binding protein (CEBPA) |
| 1021 | 2022 | 50 | CHEK1                                 |
| 1021 | 2022 | 50 | CHEK2                                 |
| 1021 | 2022 | 50 | CHUK                                  |
| 1021 | 2022 | 50 | CIC                                   |
| 1021 | 2022 | 50 | CRBN                                  |
| 1021 | 2022 | 50 | CREBBP                                |
| 1021 | 2022 | 50 | CRKL                                  |
| 1021 | 2022 | 50 | CRLF2                                 |
| 1021 | 2022 | 50 | CSF1R                                 |
| 1021 | 2022 | 50 | CTCF                                  |
| 1021 | 2022 | 50 | CTNNA1                                |

|      |      |    |                                  |
|------|------|----|----------------------------------|
| 1021 | 2022 | 50 | CTNNB1                           |
| 1021 | 2022 | 50 | CUL4A                            |
| 1021 | 2022 | 50 | CUL4B                            |
| 1021 | 2022 | 50 | CYP17A1                          |
| 1021 | 2022 | 50 | DAXX                             |
| 1021 | 2022 | 50 | DDR2                             |
| 1021 | 2022 | 50 | DIS3                             |
| 1021 | 2022 | 50 | DNMT3A                           |
| 1021 | 2022 | 50 | DOT1L                            |
| 1021 | 2022 | 50 | Epidermal Growth Factor Receptor |
| 1021 | 2022 | 50 | EMSY                             |
| 1021 | 2022 | 50 | EP300                            |
| 1021 | 2022 | 50 | EPHA3                            |
| 1021 | 2022 | 50 | EPHA5                            |
| 1021 | 2022 | 50 | EPHB1                            |
| 1021 | 2022 | 50 | ERBB2                            |
| 1021 | 2022 | 50 | ERBB3                            |
| 1021 | 2022 | 50 | ERBB4                            |
| 1021 | 2022 | 50 | ERG                              |
| 1021 | 2022 | 50 | Estrogen receptor 1              |
| 1021 | 2022 | 50 | ETV1                             |
| 1021 | 2022 | 50 | ETV4                             |
| 1021 | 2022 | 50 | ETV5                             |
| 1021 | 2022 | 50 | ETV6                             |
| 1021 | 2022 | 50 | EWSR1                            |
| 1021 | 2022 | 50 | EZH2                             |
| 1021 | 2022 | 50 | FAM123B(WTX)                     |
| 1021 | 2022 | 50 | FAM46C                           |
| 1021 | 2022 | 50 | FANCA                            |
| 1021 | 2022 | 50 | FANCC                            |
| 1021 | 2022 | 50 | FANCD2                           |
| 1021 | 2022 | 50 | FANCE                            |
| 1021 | 2022 | 50 | FANCF                            |
| 1021 | 2022 | 50 | FANCG                            |
| 1021 | 2022 | 50 | FANCI                            |
| 1021 | 2022 | 50 | FANCL                            |
| 1021 | 2022 | 50 | FANCM                            |
| 1021 | 2022 | 50 | FAT3                             |
| 1021 | 2022 | 50 | FBXW7                            |
| 1021 | 2022 | 50 | FGF10                            |

|      |      |    |                                                  |
|------|------|----|--------------------------------------------------|
| 1021 | 2022 | 50 | FGF12                                            |
| 1021 | 2022 | 50 | FGF14                                            |
| 1021 | 2022 | 50 | Fibroblast growth factor 19                      |
| 1021 | 2022 | 50 | Fibroblast growth factor 23                      |
| 1021 | 2022 | 50 | Fibroblast growth factor 3                       |
| 1021 | 2022 | 50 | FGF4                                             |
| 1021 | 2022 | 50 | FGF6                                             |
| 1021 | 2022 | 50 | FGF7                                             |
| 1021 | 2022 | 50 | Fibroblast growth receptor 1                     |
| 1021 | 2022 | 50 | Fibroblast growth receptor 2                     |
| 1021 | 2022 | 50 | Fibroblast growth receptor 3                     |
| 1021 | 2022 | 50 | Fibroblast growth receptor 4                     |
| 1021 | 2022 | 50 | FLT1                                             |
| 1021 | 2022 | 50 | Fms-like tyrosine kinase 3 (FLT3)                |
| 1021 | 2022 | 50 | FLT4                                             |
| 1021 | 2022 | 50 | FOXL2                                            |
| 1021 | 2022 | 50 | GATA1                                            |
| 1021 | 2022 | 50 | GATA2                                            |
| 1021 | 2022 | 50 | GATA3                                            |
| 1021 | 2022 | 50 | GNA11                                            |
| 1021 | 2022 | 50 | GNA13                                            |
| 1021 | 2022 | 50 | GNAQ                                             |
| 1021 | 2022 | 50 | GNAS                                             |
| 1021 | 2022 | 50 | GPR124                                           |
| 1021 | 2022 | 50 | GRIN2A                                           |
| 1021 | 2022 | 50 | GSK3B                                            |
| 1021 | 2022 | 50 | Hepatocyte growth factor                         |
| 1021 | 2022 | 50 | HLA-A                                            |
| 1021 | 2022 | 50 | HRAS                                             |
| 1021 | 2022 | 50 | IDH1                                             |
| 1021 | 2022 | 50 | IDH2                                             |
| 1021 | 2022 | 50 | Insulin-like growth factor 1                     |
| 1021 | 2022 | 50 | Insulin growth factor 1 receptor                 |
| 1021 | 2022 | 50 | Insulin-like growth factor 2, also somatomedin A |
| 1021 | 2022 | 50 | IKBKE                                            |
| 1021 | 2022 | 50 | IKZF1                                            |
| 1021 | 2022 | 50 | IL7R                                             |
| 1021 | 2022 | 50 | INHBA                                            |
| 1021 | 2022 | 50 | IRF4                                             |
| 1021 | 2022 | 50 | IRS2                                             |

|      |      |    |                                                |
|------|------|----|------------------------------------------------|
| 1021 | 2022 | 50 | JAK1                                           |
| 1021 | 2022 | 50 | JAK2                                           |
| 1021 | 2022 | 50 | JAK3                                           |
| 1021 | 2022 | 50 | JUN                                            |
| 1021 | 2022 | 50 | KDM5A                                          |
| 1021 | 2022 | 50 | KDM5C                                          |
| 1021 | 2022 | 50 | KDM6A                                          |
| 1021 | 2022 | 50 | KDR                                            |
| 1021 | 2022 | 50 | KEAP1                                          |
| 1021 | 2022 | 50 | KIT                                            |
| 1021 | 2022 | 50 | KLHL6                                          |
| 1021 | 2022 | 50 | KRAS                                           |
| 1021 | 2022 | 50 | LMO1                                           |
| 1021 | 2022 | 50 | LRP1B                                          |
| 1021 | 2022 | 50 | MAP2K1                                         |
| 1021 | 2022 | 50 | MAP2K2                                         |
| 1021 | 2022 | 50 | MAP2K4                                         |
| 1021 | 2022 | 50 | MAP3K1                                         |
| 1021 | 2022 | 50 | MAP3K13                                        |
| 1021 | 2022 | 50 | MCL1                                           |
| 1021 | 2022 | 50 | MDM2                                           |
| 1021 | 2022 | 50 | MDM4                                           |
| 1021 | 2022 | 50 | MED12                                          |
| 1021 | 2022 | 50 | MEF2B                                          |
| 1021 | 2022 | 50 | MEN1                                           |
| 1021 | 2022 | 50 | MET                                            |
| 1021 | 2022 | 50 | Microphthalmia associated transcription factor |
| 1021 | 2022 | 50 | MLH1                                           |
| 1021 | 2022 | 50 | MLL                                            |
| 1021 | 2022 | 50 | MLL2                                           |
| 1021 | 2022 | 50 | MPL                                            |
| 1021 | 2022 | 50 | MRE11A                                         |
| 1021 | 2022 | 50 | MSH2                                           |
| 1021 | 2022 | 50 | MSH6                                           |
| 1021 | 2022 | 50 | MTOR                                           |
| 1021 | 2022 | 50 | MUTYH                                          |
| 1021 | 2022 | 50 | MYC                                            |
| 1021 | 2022 | 50 | MYCL1                                          |
| 1021 | 2022 | 50 | MYCN                                           |
| 1021 | 2022 | 50 | MYD88                                          |

|      |      |    |                      |
|------|------|----|----------------------|
| 1021 | 2022 | 50 | MYST3                |
| 1021 | 2022 | 50 | NBN                  |
| 1021 | 2022 | 50 | NCOR1                |
| 1021 | 2022 | 50 | NF1                  |
| 1021 | 2022 | 50 | NF2                  |
| 1021 | 2022 | 50 | NFE2L2               |
| 1021 | 2022 | 50 | NFKBIA               |
| 1021 | 2022 | 50 | NKX2-1               |
| 1021 | 2022 | 50 | NOTCH1               |
| 1021 | 2022 | 50 | NOTCH2               |
| 1021 | 2022 | 50 | NOTCH3               |
| 1021 | 2022 | 50 | NOTCH4               |
| 1021 | 2022 | 50 | Nucleophosmin (NPM1) |
| 1021 | 2022 | 50 | NRAS                 |
| 1021 | 2022 | 50 | NSD1                 |
| 1021 | 2022 | 50 | NTRK1                |
| 1021 | 2022 | 50 | NTRK2                |
| 1021 | 2022 | 50 | NTRK3                |
| 1021 | 2022 | 50 | NUP93                |
| 1021 | 2022 | 50 | PAK3                 |
| 1021 | 2022 | 50 | PAK7                 |
| 1021 | 2022 | 50 | PALB2                |
| 1021 | 2022 | 50 | PARP1                |
| 1021 | 2022 | 50 | PARP2                |
| 1021 | 2022 | 50 | PARP3                |
| 1021 | 2022 | 50 | PARP4                |
| 1021 | 2022 | 50 | PAX5                 |
| 1021 | 2022 | 50 | PBRM1                |
| 1021 | 2022 | 50 | PDGFRA               |
| 1021 | 2022 | 50 | PDGFRB               |
| 1021 | 2022 | 50 | PDK1                 |
| 1021 | 2022 | 50 | PIK3C2G              |
| 1021 | 2022 | 50 | PIK3C3               |
| 1021 | 2022 | 50 | PIK3CG               |
| 1021 | 2022 | 50 | PIK3R1               |
| 1021 | 2022 | 50 | PIK3R2               |
| 1021 | 2022 | 50 | PMS2                 |
| 1021 | 2022 | 50 | PNRC1                |
| 1021 | 2022 | 50 | PPP2R1A              |
| 1021 | 2022 | 50 | PRDM1                |



|      |      |    |                                |
|------|------|----|--------------------------------|
| 1021 | 2022 | 50 | PRKAR1A                        |
| 1021 | 2022 | 50 | PRKDC                          |
| 1021 | 2022 | 50 | PRSS8                          |
| 1021 | 2022 | 50 | PTCH1                          |
| 1021 | 2022 | 50 | Phosphatase and Tensin homolog |
| 1021 | 2022 | 50 | PTPN11                         |
| 1021 | 2022 | 50 | RAD50                          |
| 1021 | 2022 | 50 | RAD51                          |
| 1021 | 2022 | 50 | RAD51B                         |
| 1021 | 2022 | 50 | RAD51C                         |
| 1021 | 2022 | 50 | RAD51D                         |
| 1021 | 2022 | 50 | RAD52                          |
| 1021 | 2022 | 50 | RAD54L                         |
| 1021 | 2022 | 50 | RAF1                           |
| 1021 | 2022 | 50 | RARA                           |
| 1021 | 2022 | 50 | 13q14(RB1)V                    |
| 1021 | 2022 | 50 | REL                            |
| 1021 | 2022 | 50 | RET                            |
| 1021 | 2022 | 50 | RICTOR                         |
| 1021 | 2022 | 50 | RNF43                          |
| 1021 | 2022 | 50 | ROS1                           |
| 1021 | 2022 | 50 | RPA1                           |
| 1021 | 2022 | 50 | RPTOR                          |
| 1021 | 2022 | 50 | RUNX1                          |
| 1021 | 2022 | 50 | RUNX1T1                        |
| 1021 | 2022 | 50 | SETD2                          |
| 1021 | 2022 | 50 | SF3B1                          |
| 1021 | 2022 | 50 | SH2B3                          |
| 1021 | 2022 | 50 | SMAD2                          |
| 1021 | 2022 | 50 | SMAD4                          |
| 1021 | 2022 | 50 | SMARCA4                        |
| 1021 | 2022 | 50 | SMARCB1                        |
| 1021 | 2022 | 50 | SMARCD1                        |
| 1021 | 2022 | 50 | SMO                            |
| 1021 | 2022 | 50 | SOCS1                          |
| 1021 | 2022 | 50 | SOX10                          |
| 1021 | 2022 | 50 | SOX2                           |
| 1021 | 2022 | 50 | SPEN                           |
| 1021 | 2022 | 50 | SPOP                           |
| 1021 | 2022 | 50 | SRC                            |

|      |      |    |                                   |
|------|------|----|-----------------------------------|
| 1021 | 2022 | 50 | STAG2                             |
| 1021 | 2022 | 50 | STAT4                             |
| 1021 | 2022 | 50 | STK11                             |
| 1021 | 2022 | 50 | SUFU                              |
| 1021 | 2022 | 50 | SYK                               |
| 1021 | 2022 | 50 | TBX3                              |
| 1021 | 2022 | 50 | TET2                              |
| 1021 | 2022 | 50 | TGFBR2                            |
| 1021 | 2022 | 50 | TIPARP                            |
| 1021 | 2022 | 50 | TMPRSS2                           |
| 1021 | 2022 | 50 | TNFAIP3                           |
| 1021 | 2022 | 50 | TNFRSF14                          |
| 1021 | 2022 | 50 | TOP1                              |
| 1021 | 2022 | 50 | TP53                              |
| 1021 | 2022 | 50 | TRRAP                             |
| 1021 | 2022 | 50 | Tuberous sclerosis complex 1 gene |
| 1021 | 2022 | 50 | Tuberous sclerosis complex 2 gene |
| 1021 | 2022 | 50 | TSHR                              |
| 1021 | 2022 | 50 | Von Hippel-Lindau                 |
| 1021 | 2022 | 50 | WISP3                             |
| 1021 | 2022 | 50 | WT1                               |
| 1021 | 2022 | 50 | XPO1                              |
| 1021 | 2022 | 50 | XRCC3                             |
| 1021 | 2022 | 50 | ZNF217                            |
| 1021 | 2022 | 50 | ZNF703                            |
| 1022 | 2023 | 50 | ABL1                              |
| 1022 | 2023 | 50 | AKT1                              |
| 1022 | 2023 | 50 | AKT2                              |
| 1022 | 2023 | 50 | ALK                               |
| 1022 | 2023 | 50 | ALOX12B                           |
| 1022 | 2023 | 50 | APC                               |
| 1022 | 2023 | 50 | APCDD1                            |
| 1022 | 2023 | 50 | AR                                |
| 1022 | 2023 | 50 | ARAF                              |
| 1022 | 2023 | 50 | ARFRP1                            |
| 1022 | 2023 | 50 | ARID1A                            |
| 1022 | 2023 | 50 | ARID2                             |
| 1022 | 2023 | 50 | ASXL1                             |
| 1022 | 2023 | 50 | ATM                               |

|      |      |    |                           |
|------|------|----|---------------------------|
| 1022 | 2023 | 50 | ATR                       |
| 1022 | 2023 | 50 | ATRX                      |
| 1022 | 2023 | 50 | AURKA                     |
| 1022 | 2023 | 50 | AURKB                     |
| 1022 | 2023 | 50 | AXL                       |
| 1022 | 2023 | 50 | BACH1                     |
| 1022 | 2023 | 50 | BAP1                      |
| 1022 | 2023 | 50 | BARD1                     |
| 1022 | 2023 | 50 | BCL-2                     |
| 1022 | 2023 | 50 | BCL2L2                    |
| 1022 | 2023 | 50 | BCL6                      |
| 1022 | 2023 | 50 | BCOR                      |
| 1022 | 2023 | 50 | BCORL1                    |
| 1022 | 2023 | 50 | BCR                       |
| 1022 | 2023 | 50 | BLM                       |
| 1022 | 2023 | 50 | BRAF                      |
| 1022 | 2023 | 50 | BRCA1                     |
| 1022 | 2023 | 50 | BRCA2                     |
| 1022 | 2023 | 50 | BRIP1                     |
| 1022 | 2023 | 50 | BTG1                      |
| 1022 | 2023 | 50 | BTK                       |
| 1022 | 2023 | 50 | C17orf39                  |
| 1022 | 2023 | 50 | CARD11                    |
| 1022 | 2023 | 50 | CASP8                     |
| 1022 | 2023 | 50 | CBFB                      |
| 1022 | 2023 | 50 | CBL                       |
| 1022 | 2023 | 50 | CCND1                     |
| 1022 | 2023 | 50 | CCND2                     |
| 1022 | 2023 | 50 | CCND3                     |
| 1022 | 2023 | 50 | CCNE1                     |
| 1022 | 2023 | 50 | CD79A                     |
| 1022 | 2023 | 50 | CD79B                     |
| 1022 | 2023 | 50 | CDH1                      |
| 1022 | 2023 | 50 | CDK12                     |
| 1022 | 2023 | 50 | Cyclin dependent kinase-4 |
| 1022 | 2023 | 50 | CDK6                      |
| 1022 | 2023 | 50 | CDK8                      |
| 1022 | 2023 | 50 | CDKN1B                    |
| 1022 | 2023 | 50 | CDKN2A                    |
| 1022 | 2023 | 50 | CDKN2B                    |

|      |      |    |                                       |
|------|------|----|---------------------------------------|
| 1022 | 2023 | 50 | CDKN2C                                |
| 1022 | 2023 | 50 | CCAT/enhancer binding protein (CEBPA) |
| 1022 | 2023 | 50 | CHEK1                                 |
| 1022 | 2023 | 50 | CHEK2                                 |
| 1022 | 2023 | 50 | CHUK                                  |
| 1022 | 2023 | 50 | CIC                                   |
| 1022 | 2023 | 50 | CRBN                                  |
| 1022 | 2023 | 50 | CREBBP                                |
| 1022 | 2023 | 50 | CRKL                                  |
| 1022 | 2023 | 50 | CRLF2                                 |
| 1022 | 2023 | 50 | CSF1R                                 |
| 1022 | 2023 | 50 | CTCF                                  |
| 1022 | 2023 | 50 | CTNNA1                                |
| 1022 | 2023 | 50 | CTNNB1                                |
| 1022 | 2023 | 50 | CUL4A                                 |
| 1022 | 2023 | 50 | CUL4B                                 |
| 1022 | 2023 | 50 | CYP17A1                               |
| 1022 | 2023 | 50 | DAXX                                  |
| 1022 | 2023 | 50 | DIS3                                  |
| 1022 | 2023 | 50 | DNMT3A                                |
| 1022 | 2023 | 50 | DOT1L                                 |
| 1022 | 2023 | 50 | Epidermal Growth Factor Receptor      |
| 1022 | 2023 | 50 | EMSY                                  |
| 1022 | 2023 | 50 | EP300                                 |
| 1022 | 2023 | 50 | EPHA3                                 |
| 1022 | 2023 | 50 | EPHA5                                 |
| 1022 | 2023 | 50 | EPHB1                                 |
| 1022 | 2023 | 50 | ERBB2                                 |
| 1022 | 2023 | 50 | ERBB3                                 |
| 1022 | 2023 | 50 | ERBB4                                 |
| 1022 | 2023 | 50 | ERG                                   |
| 1022 | 2023 | 50 | Estrogen receptor 1                   |
| 1022 | 2023 | 50 | ETV1                                  |
| 1022 | 2023 | 50 | ETV4                                  |
| 1022 | 2023 | 50 | ETV5                                  |
| 1022 | 2023 | 50 | ETV6                                  |
| 1022 | 2023 | 50 | EWSR1                                 |
| 1022 | 2023 | 50 | EZH2                                  |
| 1022 | 2023 | 50 | FAM123B(WTX)                          |

|      |      |    |                                   |
|------|------|----|-----------------------------------|
| 1022 | 2023 | 50 | FAM46C                            |
| 1022 | 2023 | 50 | FANCA                             |
| 1022 | 2023 | 50 | FANCC                             |
| 1022 | 2023 | 50 | FANCD2                            |
| 1022 | 2023 | 50 | FANCE                             |
| 1022 | 2023 | 50 | FANCF                             |
| 1022 | 2023 | 50 | FANCG                             |
| 1022 | 2023 | 50 | FANCI                             |
| 1022 | 2023 | 50 | FANCL                             |
| 1022 | 2023 | 50 | FANCM                             |
| 1022 | 2023 | 50 | FAT3                              |
| 1022 | 2023 | 50 | FBXW7                             |
| 1022 | 2023 | 50 | FGF10                             |
| 1022 | 2023 | 50 | FGF12                             |
| 1022 | 2023 | 50 | FGF14                             |
| 1022 | 2023 | 50 | Fibroblast growth factor 19       |
| 1022 | 2023 | 50 | Fibroblast growth factor 23       |
| 1022 | 2023 | 50 | Fibroblast growth factor 3        |
| 1022 | 2023 | 50 | FGF4                              |
| 1022 | 2023 | 50 | FGF6                              |
| 1022 | 2023 | 50 | FGF7                              |
| 1022 | 2023 | 50 | Fibroblast growth receptor 1      |
| 1022 | 2023 | 50 | Fibroblast growth receptor 2      |
| 1022 | 2023 | 50 | Fibroblast growth receptor 3      |
| 1022 | 2023 | 50 | Fibroblast growth receptor 4      |
| 1022 | 2023 | 50 | FLT1                              |
| 1022 | 2023 | 50 | Fms-like tyrosine kinase 3 (FLT3) |
| 1022 | 2023 | 50 | FLT4                              |
| 1022 | 2023 | 50 | FOXL2                             |
| 1022 | 2023 | 50 | GATA1                             |
| 1022 | 2023 | 50 | GATA2                             |
| 1022 | 2023 | 50 | GATA3                             |
| 1022 | 2023 | 50 | GNA11                             |
| 1022 | 2023 | 50 | GNA13                             |
| 1022 | 2023 | 50 | GNAQ                              |
| 1022 | 2023 | 50 | GNAS                              |
| 1022 | 2023 | 50 | GPR124                            |
| 1022 | 2023 | 50 | GRIN2A                            |
| 1022 | 2023 | 50 | GSK3B                             |
| 1022 | 2023 | 50 | Hepatocyte growth factor          |

|      |      |    |                                                  |
|------|------|----|--------------------------------------------------|
| 1022 | 2023 | 50 | HLA-A                                            |
| 1022 | 2023 | 50 | HRAS                                             |
| 1022 | 2023 | 50 | IDH1                                             |
| 1022 | 2023 | 50 | IDH2                                             |
| 1022 | 2023 | 50 | Insulin-like growth factor 1                     |
| 1022 | 2023 | 50 | Insulin growth factor 1 receptor                 |
| 1022 | 2023 | 50 | Insulin-like growth factor 2, also somatomedin A |
| 1022 | 2023 | 50 | IKZF1                                            |
| 1022 | 2023 | 50 | IL7R                                             |
| 1022 | 2023 | 50 | INHBA                                            |
| 1022 | 2023 | 50 | IRF4                                             |
| 1022 | 2023 | 50 | IRS2                                             |
| 1022 | 2023 | 50 | JAK1                                             |
| 1022 | 2023 | 50 | JAK2                                             |
| 1022 | 2023 | 50 | JAK3                                             |
| 1022 | 2023 | 50 | JUN                                              |
| 1022 | 2023 | 50 | KDM5A                                            |
| 1022 | 2023 | 50 | KDM5C                                            |
| 1022 | 2023 | 50 | KDM6A                                            |
| 1022 | 2023 | 50 | KDR                                              |
| 1022 | 2023 | 50 | KEAP1                                            |
| 1022 | 2023 | 50 | KIT                                              |
| 1022 | 2023 | 50 | KLHL6                                            |
| 1022 | 2023 | 50 | KRAS                                             |
| 1022 | 2023 | 50 | LMO1                                             |
| 1022 | 2023 | 50 | LRP1B                                            |
| 1022 | 2023 | 50 | MAP2K1                                           |
| 1022 | 2023 | 50 | MAP2K2                                           |
| 1022 | 2023 | 50 | MAP2K4                                           |
| 1022 | 2023 | 50 | MAP3K13                                          |
| 1022 | 2023 | 50 | MDM2                                             |
| 1022 | 2023 | 50 | MED12                                            |
| 1022 | 2023 | 50 | MEF2B                                            |
| 1022 | 2023 | 50 | MEN1                                             |
| 1022 | 2023 | 50 | MET                                              |
| 1022 | 2023 | 50 | Microphthalmia associated transcription factor   |
| 1022 | 2023 | 50 | MLH1                                             |
| 1022 | 2023 | 50 | MLL                                              |
| 1022 | 2023 | 50 | MLL2                                             |

|      |      |    |                      |
|------|------|----|----------------------|
| 1022 | 2023 | 50 | MPL                  |
| 1022 | 2023 | 50 | MRE11A               |
| 1022 | 2023 | 50 | MSH2                 |
| 1022 | 2023 | 50 | MSH6                 |
| 1022 | 2023 | 50 | MTOR                 |
| 1022 | 2023 | 50 | MUTYH                |
| 1022 | 2023 | 50 | MYC                  |
| 1022 | 2023 | 50 | MYCL1                |
| 1022 | 2023 | 50 | MYCN                 |
| 1022 | 2023 | 50 | MYD88                |
| 1022 | 2023 | 50 | MYST3                |
| 1022 | 2023 | 50 | NBN                  |
| 1022 | 2023 | 50 | NCOR1                |
| 1022 | 2023 | 50 | NF1                  |
| 1022 | 2023 | 50 | NF2                  |
| 1022 | 2023 | 50 | NFE2L2               |
| 1022 | 2023 | 50 | NFKBIA               |
| 1022 | 2023 | 50 | NKX2-1               |
| 1022 | 2023 | 50 | NOTCH1               |
| 1022 | 2023 | 50 | NOTCH2               |
| 1022 | 2023 | 50 | NOTCH3               |
| 1022 | 2023 | 50 | NOTCH4               |
| 1022 | 2023 | 50 | Nucleophosmin (NPM1) |
| 1022 | 2023 | 50 | NRAS                 |
| 1022 | 2023 | 50 | NSD1                 |
| 1022 | 2023 | 50 | NTRK2                |
| 1022 | 2023 | 50 | NTRK3                |
| 1022 | 2023 | 50 | NUP93                |
| 1022 | 2023 | 50 | PAK3                 |
| 1022 | 2023 | 50 | PAK7                 |
| 1022 | 2023 | 50 | PALB2                |
| 1022 | 2023 | 50 | PARP2                |
| 1022 | 2023 | 50 | PARP3                |
| 1022 | 2023 | 50 | PARP4                |
| 1022 | 2023 | 50 | PAX5                 |
| 1022 | 2023 | 50 | PBRM1                |
| 1022 | 2023 | 50 | PDGFRA               |
| 1022 | 2023 | 50 | PDGFRB               |
| 1022 | 2023 | 50 | PKD1                 |
| 1022 | 2023 | 50 | PIK3C2G              |

|      |      |    |                                |
|------|------|----|--------------------------------|
| 1022 | 2023 | 50 | PIK3C3                         |
| 1022 | 2023 | 50 | PIK3CG                         |
| 1022 | 2023 | 50 | PIK3R1                         |
| 1022 | 2023 | 50 | PIK3R2                         |
| 1022 | 2023 | 50 | PMS2                           |
| 1022 | 2023 | 50 | PNRC1                          |
| 1022 | 2023 | 50 | PPP2R1A                        |
| 1022 | 2023 | 50 | PRDM1                          |
| 1022 | 2023 | 50 | PRKAR1A                        |
| 1022 | 2023 | 50 | PRKDC                          |
| 1022 | 2023 | 50 | PRSS8                          |
| 1022 | 2023 | 50 | PTCH1                          |
| 1022 | 2023 | 50 | Phosphatase and Tensin homolog |
| 1022 | 2023 | 50 | PTPN11                         |
| 1022 | 2023 | 50 | RAD50                          |
| 1022 | 2023 | 50 | RAD51                          |
| 1022 | 2023 | 50 | RAD51B                         |
| 1022 | 2023 | 50 | RAD51C                         |
| 1022 | 2023 | 50 | RAD51D                         |
| 1022 | 2023 | 50 | RAD52                          |
| 1022 | 2023 | 50 | RAD54L                         |
| 1022 | 2023 | 50 | RAF1                           |
| 1022 | 2023 | 50 | RARA                           |
| 1022 | 2023 | 50 | 13q14(RB1)V                    |
| 1022 | 2023 | 50 | REL                            |
| 1022 | 2023 | 50 | RET                            |
| 1022 | 2023 | 50 | RICTOR                         |
| 1022 | 2023 | 50 | RNF43                          |
| 1022 | 2023 | 50 | ROS1                           |
| 1022 | 2023 | 50 | RPA1                           |
| 1022 | 2023 | 50 | RPTOR                          |
| 1022 | 2023 | 50 | RUNX1                          |
| 1022 | 2023 | 50 | RUNX1T1                        |
| 1022 | 2023 | 50 | SETD2                          |
| 1022 | 2023 | 50 | SF3B1                          |
| 1022 | 2023 | 50 | SH2B3                          |
| 1022 | 2023 | 50 | SMAD2                          |
| 1022 | 2023 | 50 | SMAD4                          |
| 1022 | 2023 | 50 | SMARCA4                        |
| 1022 | 2023 | 50 | SMARCB1                        |



|      |      |    |                                   |
|------|------|----|-----------------------------------|
| 1022 | 2023 | 50 | SMARCD1                           |
| 1022 | 2023 | 50 | SMO                               |
| 1022 | 2023 | 50 | SOCS1                             |
| 1022 | 2023 | 50 | SOX10                             |
| 1022 | 2023 | 50 | SOX2                              |
| 1022 | 2023 | 50 | SPEN                              |
| 1022 | 2023 | 50 | SPOP                              |
| 1022 | 2023 | 50 | SRC                               |
| 1022 | 2023 | 50 | STAG2                             |
| 1022 | 2023 | 50 | STAT4                             |
| 1022 | 2023 | 50 | STK11                             |
| 1022 | 2023 | 50 | SUFU                              |
| 1022 | 2023 | 50 | SYK                               |
| 1022 | 2023 | 50 | TBX3                              |
| 1022 | 2023 | 50 | TET2                              |
| 1022 | 2023 | 50 | TGFBR2                            |
| 1022 | 2023 | 50 | TIPARP                            |
| 1022 | 2023 | 50 | TMPRSS2                           |
| 1022 | 2023 | 50 | TNFAIP3                           |
| 1022 | 2023 | 50 | TNFRSF14                          |
| 1022 | 2023 | 50 | TOP1                              |
| 1022 | 2023 | 50 | TP53                              |
| 1022 | 2023 | 50 | TRRAP                             |
| 1022 | 2023 | 50 | Tuberous sclerosis complex 1 gene |
| 1022 | 2023 | 50 | Tuberous sclerosis complex 2 gene |
| 1022 | 2023 | 50 | TSHR                              |
| 1022 | 2023 | 50 | Von Hippel-Lindau                 |
| 1022 | 2023 | 50 | WISP3                             |
| 1022 | 2023 | 50 | WT1                               |
| 1022 | 2023 | 50 | XPO1                              |
| 1022 | 2023 | 50 | XRCC3                             |
| 1022 | 2023 | 50 | ZNF217                            |
| 1022 | 2023 | 50 | ZNF703                            |
| 1022 |      | 50 | AKT3                              |
| 1022 |      | 50 | CDC73                             |
| 1022 |      | 50 | DDR2                              |
| 1022 |      | 50 | IKBKE                             |
| 1022 |      | 50 | MCL1                              |
| 1022 |      | 50 | MDM4                              |

|      |      |    |          |
|------|------|----|----------|
| 1022 |      | 50 | NTRK1    |
| 1022 |      | 50 | PARP1    |
| 1023 | 2024 | 60 | ABL1     |
| 1023 | 2024 | 60 | AKT2     |
| 1023 | 2024 | 60 | AKT3     |
| 1023 | 2024 | 60 | ALK      |
| 1023 | 2024 | 60 | ALOX12B  |
| 1023 | 2024 | 60 | APC      |
| 1023 | 2024 | 60 | APCDD1   |
| 1023 | 2024 | 60 | AR       |
| 1023 | 2024 | 60 | ARAF     |
| 1023 | 2024 | 60 | ARFRP1   |
| 1023 | 2024 | 60 | ARID1A   |
| 1023 | 2024 | 60 | ARID2    |
| 1023 | 2024 | 60 | ASXL1    |
| 1023 | 2024 | 60 | ATR      |
| 1023 | 2024 | 60 | ATRX     |
| 1023 | 2024 | 60 | AURKA    |
| 1023 | 2024 | 60 | AURKB    |
| 1023 | 2024 | 60 | AXL      |
| 1023 | 2024 | 60 | BACH1    |
| 1023 | 2024 | 60 | BAP1     |
| 1023 | 2024 | 60 | BARD1    |
| 1023 | 2024 | 60 | BCL-2    |
| 1023 | 2024 | 60 | BCL2L2   |
| 1023 | 2024 | 60 | BCL6     |
| 1023 | 2024 | 60 | BCOR     |
| 1023 | 2024 | 60 | BCORL1   |
| 1023 | 2024 | 60 | BCR      |
| 1023 | 2024 | 60 | BLM      |
| 1023 | 2024 | 60 | BRAF     |
| 1023 | 2024 | 60 | BRCA1    |
| 1023 | 2024 | 60 | BRCA2    |
| 1023 | 2024 | 60 | BRIP1    |
| 1023 | 2024 | 60 | BTG1     |
| 1023 | 2024 | 60 | BTK      |
| 1023 | 2024 | 60 | C17orf39 |
| 1023 | 2024 | 60 | CARD11   |
| 1023 | 2024 | 60 | CASP8    |
| 1023 | 2024 | 60 | CBFB     |

|      |      |    |                                       |
|------|------|----|---------------------------------------|
| 1023 | 2024 | 60 | CBL                                   |
| 1023 | 2024 | 60 | CCND2                                 |
| 1023 | 2024 | 60 | CCND3                                 |
| 1023 | 2024 | 60 | CCNE1                                 |
| 1023 | 2024 | 60 | CD79A                                 |
| 1023 | 2024 | 60 | CD79B                                 |
| 1023 | 2024 | 60 | CDC73                                 |
| 1023 | 2024 | 60 | CDH1                                  |
| 1023 | 2024 | 60 | CDK12                                 |
| 1023 | 2024 | 60 | Cyclin dependent kinase-4             |
| 1023 | 2024 | 60 | CDK6                                  |
| 1023 | 2024 | 60 | CDK8                                  |
| 1023 | 2024 | 60 | CDKN1B                                |
| 1023 | 2024 | 60 | CDKN2A                                |
| 1023 | 2024 | 60 | CDKN2B                                |
| 1023 | 2024 | 60 | CDKN2C                                |
| 1023 | 2024 | 60 | CCAT/enhancer binding protein (CEBPA) |
| 1023 | 2024 | 60 | CHEK1                                 |
| 1023 | 2024 | 60 | CHEK2                                 |
| 1023 | 2024 | 60 | CHUK                                  |
| 1023 | 2024 | 60 | CIC                                   |
| 1023 | 2024 | 60 | CRBN                                  |
| 1023 | 2024 | 60 | CREBBP                                |
| 1023 | 2024 | 60 | CRKL                                  |
| 1023 | 2024 | 60 | CRLF2                                 |
| 1023 | 2024 | 60 | CSF1R                                 |
| 1023 | 2024 | 60 | CTCF                                  |
| 1023 | 2024 | 60 | CTNNA1                                |
| 1023 | 2024 | 60 | CTNNB1                                |
| 1023 | 2024 | 60 | CUL4A                                 |
| 1023 | 2024 | 60 | CUL4B                                 |
| 1023 | 2024 | 60 | CYP17A1                               |
| 1023 | 2024 | 60 | DAXX                                  |
| 1023 | 2024 | 60 | DDR2                                  |
| 1023 | 2024 | 60 | DIS3                                  |
| 1023 | 2024 | 60 | DNMT3A                                |
| 1023 | 2024 | 60 | DOT1L                                 |
| 1023 | 2024 | 60 | Epidermal Growth Factor Receptor      |
| 1023 | 2024 | 60 | EMSY                                  |

|      |      |    |                              |
|------|------|----|------------------------------|
| 1023 | 2024 | 60 | EP300                        |
| 1023 | 2024 | 60 | EPHA3                        |
| 1023 | 2024 | 60 | EPHA5                        |
| 1023 | 2024 | 60 | EPHB1                        |
| 1023 | 2024 | 60 | ERBB2                        |
| 1023 | 2024 | 60 | ERBB3                        |
| 1023 | 2024 | 60 | ERBB4                        |
| 1023 | 2024 | 60 | ERG                          |
| 1023 | 2024 | 60 | Estrogen receptor 1          |
| 1023 | 2024 | 60 | ETV1                         |
| 1023 | 2024 | 60 | ETV4                         |
| 1023 | 2024 | 60 | ETV5                         |
| 1023 | 2024 | 60 | ETV6                         |
| 1023 | 2024 | 60 | EWSR1                        |
| 1023 | 2024 | 60 | EZH2                         |
| 1023 | 2024 | 60 | FAM123B(WTX)                 |
| 1023 | 2024 | 60 | FAM46C                       |
| 1023 | 2024 | 60 | FANCA                        |
| 1023 | 2024 | 60 | FANCC                        |
| 1023 | 2024 | 60 | FANCD2                       |
| 1023 | 2024 | 60 | FANCE                        |
| 1023 | 2024 | 60 | FANCF                        |
| 1023 | 2024 | 60 | FANCG                        |
| 1023 | 2024 | 60 | FANCI                        |
| 1023 | 2024 | 60 | FANCL                        |
| 1023 | 2024 | 60 | FANCM                        |
| 1023 | 2024 | 60 | FAT3                         |
| 1023 | 2024 | 60 | FBXW7                        |
| 1023 | 2024 | 60 | FGF10                        |
| 1023 | 2024 | 60 | FGF12                        |
| 1023 | 2024 | 60 | FGF14                        |
| 1023 | 2024 | 60 | Fibroblast growth factor 19  |
| 1023 | 2024 | 60 | Fibroblast growth factor 23  |
| 1023 | 2024 | 60 | Fibroblast growth factor 3   |
| 1023 | 2024 | 60 | FGF4                         |
| 1023 | 2024 | 60 | FGF6                         |
| 1023 | 2024 | 60 | FGF7                         |
| 1023 | 2024 | 60 | Fibroblast growth receptor 1 |
| 1023 | 2024 | 60 | Fibroblast growth receptor 2 |
| 1023 | 2024 | 60 | Fibroblast growth receptor 3 |

|      |      |    |                                                  |
|------|------|----|--------------------------------------------------|
| 1023 | 2024 | 60 | Fibroblast growth receptor 4                     |
| 1023 | 2024 | 60 | FLT1                                             |
| 1023 | 2024 | 60 | Fms-like tyrosine kinase 3 (FLT3)                |
| 1023 | 2024 | 60 | FLT4                                             |
| 1023 | 2024 | 60 | FOXL2                                            |
| 1023 | 2024 | 60 | GATA1                                            |
| 1023 | 2024 | 60 | GATA2                                            |
| 1023 | 2024 | 60 | GATA3                                            |
| 1023 | 2024 | 60 | GNA11                                            |
| 1023 | 2024 | 60 | GNA13                                            |
| 1023 | 2024 | 60 | GNAQ                                             |
| 1023 | 2024 | 60 | GNAS                                             |
| 1023 | 2024 | 60 | GPR124                                           |
| 1023 | 2024 | 60 | GRIN2A                                           |
| 1023 | 2024 | 60 | GSK3B                                            |
| 1023 | 2024 | 60 | Hepatocyte growth factor                         |
| 1023 | 2024 | 60 | HLA-A                                            |
| 1023 | 2024 | 60 | HRAS                                             |
| 1023 | 2024 | 60 | IDH1                                             |
| 1023 | 2024 | 60 | IDH2                                             |
| 1023 | 2024 | 60 | Insulin-like growth factor 1                     |
| 1023 | 2024 | 60 | Insulin growth factor 1 receptor                 |
| 1023 | 2024 | 60 | Insulin-like growth factor 2, also somatomedin A |
| 1023 | 2024 | 60 | IKBKE                                            |
| 1023 | 2024 | 60 | IKZF1                                            |
| 1023 | 2024 | 60 | IL7R                                             |
| 1023 | 2024 | 60 | INHBA                                            |
| 1023 | 2024 | 60 | IRF4                                             |
| 1023 | 2024 | 60 | IRS2                                             |
| 1023 | 2024 | 60 | JAK1                                             |
| 1023 | 2024 | 60 | JAK2                                             |
| 1023 | 2024 | 60 | JAK3                                             |
| 1023 | 2024 | 60 | JUN                                              |
| 1023 | 2024 | 60 | KDM5A                                            |
| 1023 | 2024 | 60 | KDM5C                                            |
| 1023 | 2024 | 60 | KDM6A                                            |
| 1023 | 2024 | 60 | KDR                                              |
| 1023 | 2024 | 60 | KEAP1                                            |
| 1023 | 2024 | 60 | KIT                                              |
| 1023 | 2024 | 60 | KLHL6                                            |

|      |      |    |                                                |
|------|------|----|------------------------------------------------|
| 1023 | 2024 | 60 | KRAS                                           |
| 1023 | 2024 | 60 | LMO1                                           |
| 1023 | 2024 | 60 | LRP1B                                          |
| 1023 | 2024 | 60 | MAP2K1                                         |
| 1023 | 2024 | 60 | MAP2K2                                         |
| 1023 | 2024 | 60 | MAP2K4                                         |
| 1023 | 2024 | 60 | MAP3K1                                         |
| 1023 | 2024 | 60 | MAP3K13                                        |
| 1023 | 2024 | 60 | MCL1                                           |
| 1023 | 2024 | 60 | MDM2                                           |
| 1023 | 2024 | 60 | MDM4                                           |
| 1023 | 2024 | 60 | MED12                                          |
| 1023 | 2024 | 60 | MEF2B                                          |
| 1023 | 2024 | 60 | MEN1                                           |
| 1023 | 2024 | 60 | MET                                            |
| 1023 | 2024 | 60 | Microphthalmia associated transcription factor |
| 1023 | 2024 | 60 | MLH1                                           |
| 1023 | 2024 | 60 | MLL                                            |
| 1023 | 2024 | 60 | MLL2                                           |
| 1023 | 2024 | 60 | MPL                                            |
| 1023 | 2024 | 60 | MRE11A                                         |
| 1023 | 2024 | 60 | MSH2                                           |
| 1023 | 2024 | 60 | MSH6                                           |
| 1023 | 2024 | 60 | MTOR                                           |
| 1023 | 2024 | 60 | MUTYH                                          |
| 1023 | 2024 | 60 | MYC                                            |
| 1023 | 2024 | 60 | MYCL1                                          |
| 1023 | 2024 | 60 | MYCN                                           |
| 1023 | 2024 | 60 | MYD88                                          |
| 1023 | 2024 | 60 | NBN                                            |
| 1023 | 2024 | 60 | NCOR1                                          |
| 1023 | 2024 | 60 | NF1                                            |
| 1023 | 2024 | 60 | NF2                                            |
| 1023 | 2024 | 60 | NFE2L2                                         |
| 1023 | 2024 | 60 | NFKBIA                                         |
| 1023 | 2024 | 60 | NKX2-1                                         |
| 1023 | 2024 | 60 | NOTCH1                                         |
| 1023 | 2024 | 60 | NOTCH2                                         |
| 1023 | 2024 | 60 | NOTCH3                                         |
| 1023 | 2024 | 60 | NOTCH4                                         |

|      |      |    |                                |
|------|------|----|--------------------------------|
| 1023 | 2024 | 60 | Nucleophosmin (NPM1)           |
| 1023 | 2024 | 60 | NRAS                           |
| 1023 | 2024 | 60 | NSD1                           |
| 1023 | 2024 | 60 | NTRK1                          |
| 1023 | 2024 | 60 | NTRK2                          |
| 1023 | 2024 | 60 | NTRK3                          |
| 1023 | 2024 | 60 | NUP93                          |
| 1023 | 2024 | 60 | PAK3                           |
| 1023 | 2024 | 60 | PAK7                           |
| 1023 | 2024 | 60 | PALB2                          |
| 1023 | 2024 | 60 | PARP1                          |
| 1023 | 2024 | 60 | PARP2                          |
| 1023 | 2024 | 60 | PARP3                          |
| 1023 | 2024 | 60 | PARP4                          |
| 1023 | 2024 | 60 | PAX5                           |
| 1023 | 2024 | 60 | PBRM1                          |
| 1023 | 2024 | 60 | PDGFRA                         |
| 1023 | 2024 | 60 | PDGFRB                         |
| 1023 | 2024 | 60 | PDK1                           |
| 1023 | 2024 | 60 | PIK3C2G                        |
| 1023 | 2024 | 60 | PIK3C3                         |
| 1023 | 2024 | 60 | <i>PIK3CA</i>                  |
| 1023 | 2024 | 60 | PIK3CG                         |
| 1023 | 2024 | 60 | PIK3R1                         |
| 1023 | 2024 | 60 | PIK3R2                         |
| 1023 | 2024 | 60 | PMS2                           |
| 1023 | 2024 | 60 | PNRC1                          |
| 1023 | 2024 | 60 | PPP2R1A                        |
| 1023 | 2024 | 60 | PRDM1                          |
| 1023 | 2024 | 60 | PRKAR1A                        |
| 1023 | 2024 | 60 | PRKDC                          |
| 1023 | 2024 | 60 | PRSS8                          |
| 1023 | 2024 | 60 | PTCH1                          |
| 1023 | 2024 | 60 | Phosphatase and Tensin homolog |
| 1023 | 2024 | 60 | PTPN11                         |
| 1023 | 2024 | 60 | RAD50                          |
| 1023 | 2024 | 60 | RAD51                          |
| 1023 | 2024 | 60 | RAD51B                         |
| 1023 | 2024 | 60 | RAD51C                         |
| 1023 | 2024 | 60 | RAD51D                         |

|      |      |    |             |
|------|------|----|-------------|
| 1023 | 2024 | 60 | RAD52       |
| 1023 | 2024 | 60 | RAD54L      |
| 1023 | 2024 | 60 | RAF1        |
| 1023 | 2024 | 60 | RARA        |
| 1023 | 2024 | 60 | 13q14(RB1)V |
| 1023 | 2024 | 60 | REL         |
| 1023 | 2024 | 60 | RET         |
| 1023 | 2024 | 60 | RICTOR      |
| 1023 | 2024 | 60 | RNF43       |
| 1023 | 2024 | 60 | ROS1        |
| 1023 | 2024 | 60 | RPA1        |
| 1023 | 2024 | 60 | RPTOR       |
| 1023 | 2024 | 60 | RUNX1       |
| 1023 | 2024 | 60 | RUNX1T1     |
| 1023 | 2024 | 60 | SETD2       |
| 1023 | 2024 | 60 | SF3B1       |
| 1023 | 2024 | 60 | SH2B3       |
| 1023 | 2024 | 60 | SMAD2       |
| 1023 | 2024 | 60 | SMAD4       |
| 1023 | 2024 | 60 | SMARCA4     |
| 1023 | 2024 | 60 | SMARCB1     |
| 1023 | 2024 | 60 | SMARCD1     |
| 1023 | 2024 | 60 | SMO         |
| 1023 | 2024 | 60 | SOCS1       |
| 1023 | 2024 | 60 | SOX10       |
| 1023 | 2024 | 60 | SOX2        |
| 1023 | 2024 | 60 | SPEN        |
| 1023 | 2024 | 60 | SPOP        |
| 1023 | 2024 | 60 | SRC         |
| 1023 | 2024 | 60 | STAG2       |
| 1023 | 2024 | 60 | STAT4       |
| 1023 | 2024 | 60 | STK11       |
| 1023 | 2024 | 60 | SUFU        |
| 1023 | 2024 | 60 | SYK         |
| 1023 | 2024 | 60 | TBX3        |
| 1023 | 2024 | 60 | TET2        |
| 1023 | 2024 | 60 | TGFBR2      |
| 1023 | 2024 | 60 | TIPARP      |
| 1023 | 2024 | 60 | TMPRSS2     |
| 1023 | 2024 | 60 | TNFAIP3     |



|      |      |    |                                   |
|------|------|----|-----------------------------------|
| 1023 | 2024 | 60 | TNFRSF14                          |
| 1023 | 2024 | 60 | TOP1                              |
| 1023 | 2024 | 60 | TP53                              |
| 1023 | 2024 | 60 | TRRAP                             |
| 1023 | 2024 | 60 | Tuberous sclerosis complex 1 gene |
| 1023 | 2024 | 60 | Tuberous sclerosis complex 2 gene |
| 1023 | 2024 | 60 | TSHR                              |
| 1023 | 2024 | 60 | Von Hippel-Lindau                 |
| 1023 | 2024 | 60 | WISP3                             |
| 1023 | 2024 | 60 | WT1                               |
| 1023 | 2024 | 60 | XPO1                              |
| 1023 | 2024 | 60 | XRCC3                             |
| 1023 | 2024 | 60 | ZNF217                            |
| 1023 | 2024 | 60 | ZNF703                            |
| 1023 |      | 60 | ATM                               |
| 1030 | 2031 | 50 | ABL1                              |
| 1030 | 2031 | 50 | AKT1                              |
| 1030 | 2031 | 50 | AKT2                              |
| 1030 | 2031 | 50 | AKT3                              |
| 1030 | 2031 | 50 | ALK                               |
| 1030 | 2031 | 50 | ALOX12B                           |
| 1030 | 2031 | 50 | APC                               |
| 1030 | 2031 | 50 | APCDD1                            |
| 1030 | 2031 | 50 | AR                                |
| 1030 | 2031 | 50 | ARAF                              |
| 1030 | 2031 | 50 | ARFRP1                            |
| 1030 | 2031 | 50 | ARID1A                            |
| 1030 | 2031 | 50 | ARID2                             |
| 1030 | 2031 | 50 | ASXL1                             |
| 1030 | 2031 | 50 | ATM                               |
| 1030 | 2031 | 50 | ATR                               |
| 1030 | 2031 | 50 | ATRX                              |
| 1030 | 2031 | 50 | AURKA                             |
| 1030 | 2031 | 50 | AURKB                             |
| 1030 | 2031 | 50 | AXL                               |
| 1030 | 2031 | 50 | BACH1                             |
| 1030 | 2031 | 50 | BAP1                              |
| 1030 | 2031 | 50 | BARD1                             |
| 1030 | 2031 | 50 | BCL-2                             |

|      |      |    |                                       |
|------|------|----|---------------------------------------|
| 1030 | 2031 | 50 | BCL2L2                                |
| 1030 | 2031 | 50 | BCL6                                  |
| 1030 | 2031 | 50 | BCOR                                  |
| 1030 | 2031 | 50 | BCORL1                                |
| 1030 | 2031 | 50 | BCR                                   |
| 1030 | 2031 | 50 | BLM                                   |
| 1030 | 2031 | 50 | BRAF                                  |
| 1030 | 2031 | 50 | BRCA1                                 |
| 1030 | 2031 | 50 | BRCA2                                 |
| 1030 | 2031 | 50 | BRIP1                                 |
| 1030 | 2031 | 50 | BTG1                                  |
| 1030 | 2031 | 50 | BTK                                   |
| 1030 | 2031 | 50 | C17orf39                              |
| 1030 | 2031 | 50 | CARD11                                |
| 1030 | 2031 | 50 | CASP8                                 |
| 1030 | 2031 | 50 | CBFB                                  |
| 1030 | 2031 | 50 | CBL                                   |
| 1030 | 2031 | 50 | CCND1                                 |
| 1030 | 2031 | 50 | CCND2                                 |
| 1030 | 2031 | 50 | CCND3                                 |
| 1030 | 2031 | 50 | CCNE1                                 |
| 1030 | 2031 | 50 | CD79A                                 |
| 1030 | 2031 | 50 | CD79B                                 |
| 1030 | 2031 | 50 | CDC73                                 |
| 1030 | 2031 | 50 | CDH1                                  |
| 1030 | 2031 | 50 | CDK12                                 |
| 1030 | 2031 | 50 | Cyclin dependent kinase-4             |
| 1030 | 2031 | 50 | CDK6                                  |
| 1030 | 2031 | 50 | CDK8                                  |
| 1030 | 2031 | 50 | CDKN1B                                |
| 1030 | 2031 | 50 | CDKN2A                                |
| 1030 | 2031 | 50 | CDKN2B                                |
| 1030 | 2031 | 50 | CDKN2C                                |
| 1030 | 2031 | 50 | CCAT/enhancer binding protein (CEBPA) |
| 1030 | 2031 | 50 | CHEK1                                 |
| 1030 | 2031 | 50 | CHEK2                                 |
| 1030 | 2031 | 50 | CHUK                                  |
| 1030 | 2031 | 50 | CIC                                   |
| 1030 | 2031 | 50 | CRBN                                  |
| 1030 | 2031 | 50 | CREBBP                                |

|      |      |    |                                  |
|------|------|----|----------------------------------|
| 1030 | 2031 | 50 | CRKL                             |
| 1030 | 2031 | 50 | CRLF2                            |
| 1030 | 2031 | 50 | CSF1R                            |
| 1030 | 2031 | 50 | CTCF                             |
| 1030 | 2031 | 50 | CTNNA1                           |
| 1030 | 2031 | 50 | CTNNB1                           |
| 1030 | 2031 | 50 | CUL4A                            |
| 1030 | 2031 | 50 | CUL4B                            |
| 1030 | 2031 | 50 | CYP17A1                          |
| 1030 | 2031 | 50 | DAXX                             |
| 1030 | 2031 | 50 | DDR2                             |
| 1030 | 2031 | 50 | DIS3                             |
| 1030 | 2031 | 50 | DNMT3A                           |
| 1030 | 2031 | 50 | DOT1L                            |
| 1030 | 2031 | 50 | Epidermal Growth Factor Receptor |
| 1030 | 2031 | 50 | EMSY                             |
| 1030 | 2031 | 50 | EP300                            |
| 1030 | 2031 | 50 | EPHA3                            |
| 1030 | 2031 | 50 | EPHA5                            |
| 1030 | 2031 | 50 | EPHB1                            |
| 1030 | 2031 | 50 | ERBB2                            |
| 1030 | 2031 | 50 | ERBB3                            |
| 1030 | 2031 | 50 | ERBB4                            |
| 1030 | 2031 | 50 | ERG                              |
| 1030 | 2031 | 50 | ETV1                             |
| 1030 | 2031 | 50 | ETV4                             |
| 1030 | 2031 | 50 | ETV5                             |
| 1030 | 2031 | 50 | ETV6                             |
| 1030 | 2031 | 50 | EWSR1                            |
| 1030 | 2031 | 50 | EZH2                             |
| 1030 | 2031 | 50 | FAM123B(WTX)                     |
| 1030 | 2031 | 50 | FAM46C                           |
| 1030 | 2031 | 50 | FANCA                            |
| 1030 | 2031 | 50 | FANCC                            |
| 1030 | 2031 | 50 | FANCD2                           |
| 1030 | 2031 | 50 | FANCE                            |
| 1030 | 2031 | 50 | FANCF                            |
| 1030 | 2031 | 50 | FANCG                            |
| 1030 | 2031 | 50 | FANCI                            |
| 1030 | 2031 | 50 | FANCL                            |

|      |      |    |                                                  |
|------|------|----|--------------------------------------------------|
| 1030 | 2031 | 50 | FANCM                                            |
| 1030 | 2031 | 50 | FAT3                                             |
| 1030 | 2031 | 50 | FBXW7                                            |
| 1030 | 2031 | 50 | FGF10                                            |
| 1030 | 2031 | 50 | FGF12                                            |
| 1030 | 2031 | 50 | FGF14                                            |
| 1030 | 2031 | 50 | Fibroblast growth factor 19                      |
| 1030 | 2031 | 50 | Fibroblast growth factor 23                      |
| 1030 | 2031 | 50 | Fibroblast growth factor 3                       |
| 1030 | 2031 | 50 | FGF4                                             |
| 1030 | 2031 | 50 | FGF6                                             |
| 1030 | 2031 | 50 | FGF7                                             |
| 1030 | 2031 | 50 | Fibroblast growth receptor 1                     |
| 1030 | 2031 | 50 | Fibroblast growth receptor 2                     |
| 1030 | 2031 | 50 | Fibroblast growth receptor 3                     |
| 1030 | 2031 | 50 | Fibroblast growth receptor 4                     |
| 1030 | 2031 | 50 | FLT1                                             |
| 1030 | 2031 | 50 | Fms-like tyrosine kinase 3 (FLT3)                |
| 1030 | 2031 | 50 | FLT4                                             |
| 1030 | 2031 | 50 | FOXL2                                            |
| 1030 | 2031 | 50 | GATA1                                            |
| 1030 | 2031 | 50 | GATA2                                            |
| 1030 | 2031 | 50 | GATA3                                            |
| 1030 | 2031 | 50 | GNA11                                            |
| 1030 | 2031 | 50 | GNA13                                            |
| 1030 | 2031 | 50 | GNAQ                                             |
| 1030 | 2031 | 50 | GNAS                                             |
| 1030 | 2031 | 50 | GPR124                                           |
| 1030 | 2031 | 50 | GRIN2A                                           |
| 1030 | 2031 | 50 | GSK3B                                            |
| 1030 | 2031 | 50 | Hepatocyte growth factor                         |
| 1030 | 2031 | 50 | HLA-A                                            |
| 1030 | 2031 | 50 | HRAS                                             |
| 1030 | 2031 | 50 | IDH1                                             |
| 1030 | 2031 | 50 | IDH2                                             |
| 1030 | 2031 | 50 | Insulin-like growth factor 1                     |
| 1030 | 2031 | 50 | Insulin growth factor 1 receptor                 |
| 1030 | 2031 | 50 | Insulin-like growth factor 2, also somatomedin A |
| 1030 | 2031 | 50 | IKBKE                                            |
| 1030 | 2031 | 50 | IKZF1                                            |

|      |      |    |                                                |
|------|------|----|------------------------------------------------|
| 1030 | 2031 | 50 | IL7R                                           |
| 1030 | 2031 | 50 | INHBA                                          |
| 1030 | 2031 | 50 | IRF4                                           |
| 1030 | 2031 | 50 | IRS2                                           |
| 1030 | 2031 | 50 | JAK1                                           |
| 1030 | 2031 | 50 | JAK2                                           |
| 1030 | 2031 | 50 | JAK3                                           |
| 1030 | 2031 | 50 | JUN                                            |
| 1030 | 2031 | 50 | KDM5A                                          |
| 1030 | 2031 | 50 | KDM5C                                          |
| 1030 | 2031 | 50 | KDM6A                                          |
| 1030 | 2031 | 50 | KDR                                            |
| 1030 | 2031 | 50 | KEAP1                                          |
| 1030 | 2031 | 50 | KIT                                            |
| 1030 | 2031 | 50 | KLHL6                                          |
| 1030 | 2031 | 50 | KRAS                                           |
| 1030 | 2031 | 50 | LMO1                                           |
| 1030 | 2031 | 50 | LRP1B                                          |
| 1030 | 2031 | 50 | MAP2K1                                         |
| 1030 | 2031 | 50 | MAP2K2                                         |
| 1030 | 2031 | 50 | MAP2K4                                         |
| 1030 | 2031 | 50 | MAP3K1                                         |
| 1030 | 2031 | 50 | MAP3K13                                        |
| 1030 | 2031 | 50 | MCL1                                           |
| 1030 | 2031 | 50 | MDM2                                           |
| 1030 | 2031 | 50 | MDM4                                           |
| 1030 | 2031 | 50 | MED12                                          |
| 1030 | 2031 | 50 | MEF2B                                          |
| 1030 | 2031 | 50 | MEN1                                           |
| 1030 | 2031 | 50 | MET                                            |
| 1030 | 2031 | 50 | Microphthalmia associated transcription factor |
| 1030 | 2031 | 50 | MLH1                                           |
| 1030 | 2031 | 50 | MLL                                            |
| 1030 | 2031 | 50 | MLL2                                           |
| 1030 | 2031 | 50 | MPL                                            |
| 1030 | 2031 | 50 | MRE11A                                         |
| 1030 | 2031 | 50 | MSH2                                           |
| 1030 | 2031 | 50 | MSH6                                           |
| 1030 | 2031 | 50 | MTOR                                           |
| 1030 | 2031 | 50 | MUTYH                                          |

|      |      |    |                      |
|------|------|----|----------------------|
| 1030 | 2031 | 50 | MYC                  |
| 1030 | 2031 | 50 | MYCL1                |
| 1030 | 2031 | 50 | MYCN                 |
| 1030 | 2031 | 50 | MYD88                |
| 1030 | 2031 | 50 | MYST3                |
| 1030 | 2031 | 50 | NBN                  |
| 1030 | 2031 | 50 | NCOR1                |
| 1030 | 2031 | 50 | NF1                  |
| 1030 | 2031 | 50 | NF2                  |
| 1030 | 2031 | 50 | NFE2L2               |
| 1030 | 2031 | 50 | NFKBIA               |
| 1030 | 2031 | 50 | NKX2-1               |
| 1030 | 2031 | 50 | NOTCH1               |
| 1030 | 2031 | 50 | NOTCH2               |
| 1030 | 2031 | 50 | NOTCH3               |
| 1030 | 2031 | 50 | NOTCH4               |
| 1030 | 2031 | 50 | Nucleophosmin (NPM1) |
| 1030 | 2031 | 50 | NRAS                 |
| 1030 | 2031 | 50 | NSD1                 |
| 1030 | 2031 | 50 | NTRK1                |
| 1030 | 2031 | 50 | NTRK2                |
| 1030 | 2031 | 50 | NTRK3                |
| 1030 | 2031 | 50 | NUP93                |
| 1030 | 2031 | 50 | PAK3                 |
| 1030 | 2031 | 50 | PAK7                 |
| 1030 | 2031 | 50 | PALB2                |
| 1030 | 2031 | 50 | PARP1                |
| 1030 | 2031 | 50 | PARP2                |
| 1030 | 2031 | 50 | PARP3                |
| 1030 | 2031 | 50 | PARP4                |
| 1030 | 2031 | 50 | PAX5                 |
| 1030 | 2031 | 50 | PBRM1                |
| 1030 | 2031 | 50 | PDGFRA               |
| 1030 | 2031 | 50 | PDGFRB               |
| 1030 | 2031 | 50 | PDK1                 |
| 1030 | 2031 | 50 | PIK3C2G              |
| 1030 | 2031 | 50 | PIK3C3               |
| 1030 | 2031 | 50 | PIK3CG               |
| 1030 | 2031 | 50 | PIK3R1               |
| 1030 | 2031 | 50 | PIK3R2               |

|      |      |    |             |
|------|------|----|-------------|
| 1030 | 2031 | 50 | PMS2        |
| 1030 | 2031 | 50 | PNRC1       |
| 1030 | 2031 | 50 | PPP2R1A     |
| 1030 | 2031 | 50 | PRDM1       |
| 1030 | 2031 | 50 | PRKAR1A     |
| 1030 | 2031 | 50 | PRKDC       |
| 1030 | 2031 | 50 | PRSS8       |
| 1030 | 2031 | 50 | PTCH1       |
| 1030 | 2031 | 50 | PTPN11      |
| 1030 | 2031 | 50 | RAD50       |
| 1030 | 2031 | 50 | RAD51       |
| 1030 | 2031 | 50 | RAD51B      |
| 1030 | 2031 | 50 | RAD51C      |
| 1030 | 2031 | 50 | RAD51D      |
| 1030 | 2031 | 50 | RAD52       |
| 1030 | 2031 | 50 | RAD54L      |
| 1030 | 2031 | 50 | RAF1        |
| 1030 | 2031 | 50 | RARA        |
| 1030 | 2031 | 50 | 13q14(RB1)V |
| 1030 | 2031 | 50 | REL         |
| 1030 | 2031 | 50 | RET         |
| 1030 | 2031 | 50 | RICTOR      |
| 1030 | 2031 | 50 | RNF43       |
| 1030 | 2031 | 50 | ROS1        |
| 1030 | 2031 | 50 | RPA1        |
| 1030 | 2031 | 50 | RPTOR       |
| 1030 | 2031 | 50 | RUNX1       |
| 1030 | 2031 | 50 | RUNX1T1     |
| 1030 | 2031 | 50 | SETD2       |
| 1030 | 2031 | 50 | SF3B1       |
| 1030 | 2031 | 50 | SH2B3       |
| 1030 | 2031 | 50 | SMAD2       |
| 1030 | 2031 | 50 | SMAD4       |
| 1030 | 2031 | 50 | SMARCA4     |
| 1030 | 2031 | 50 | SMARCB1     |
| 1030 | 2031 | 50 | SMARCD1     |
| 1030 | 2031 | 50 | SMO         |
| 1030 | 2031 | 50 | SOCS1       |
| 1030 | 2031 | 50 | SOX10       |
| 1030 | 2031 | 50 | SOX2        |

|      |      |    |                                   |
|------|------|----|-----------------------------------|
| 1030 | 2031 | 50 | SPEN                              |
| 1030 | 2031 | 50 | SPOP                              |
| 1030 | 2031 | 50 | SRC                               |
| 1030 | 2031 | 50 | STAG2                             |
| 1030 | 2031 | 50 | STAT4                             |
| 1030 | 2031 | 50 | STK11                             |
| 1030 | 2031 | 50 | SUFU                              |
| 1030 | 2031 | 50 | SYK                               |
| 1030 | 2031 | 50 | TBX3                              |
| 1030 | 2031 | 50 | TET2                              |
| 1030 | 2031 | 50 | TGFBR2                            |
| 1030 | 2031 | 50 | TIPARP                            |
| 1030 | 2031 | 50 | TMPRSS2                           |
| 1030 | 2031 | 50 | TNFAIP3                           |
| 1030 | 2031 | 50 | TNFRSF14                          |
| 1030 | 2031 | 50 | TOP1                              |
| 1030 | 2031 | 50 | TP53                              |
| 1030 | 2031 | 50 | TRRAP                             |
| 1030 | 2031 | 50 | Tuberous sclerosis complex 1 gene |
| 1030 | 2031 | 50 | Tuberous sclerosis complex 2 gene |
| 1030 | 2031 | 50 | TSHR                              |
| 1030 | 2031 | 50 | Von Hippel-Lindau                 |
| 1030 | 2031 | 50 | WISP3                             |
| 1030 | 2031 | 50 | WT1                               |
| 1030 | 2031 | 50 | XPO1                              |
| 1030 | 2031 | 50 | XRCC3                             |
| 1030 | 2031 | 50 | ZNF217                            |
| 1030 | 2031 | 50 | ZNF703                            |
| 1032 | 2033 | 20 | ABL1                              |
| 1032 | 2033 | 20 | AKT1                              |
| 1032 | 2033 | 20 | AKT2                              |
| 1032 | 2033 | 20 | AKT3                              |
| 1032 | 2033 | 20 | ALK                               |
| 1032 | 2033 | 20 | ALOX12B                           |
| 1032 | 2033 | 20 | APC                               |
| 1032 | 2033 | 20 | APCDD1                            |
| 1032 | 2033 | 20 | AR                                |
| 1032 | 2033 | 20 | ARAF                              |
| 1032 | 2033 | 20 | ARFRP1                            |



|      |      |    |                           |
|------|------|----|---------------------------|
| 1032 | 2033 | 20 | ARID1A                    |
| 1032 | 2033 | 20 | ARID2                     |
| 1032 | 2033 | 20 | ASXL1                     |
| 1032 | 2033 | 20 | ATM                       |
| 1032 | 2033 | 20 | ATR                       |
| 1032 | 2033 | 20 | ATRX                      |
| 1032 | 2033 | 20 | AURKA                     |
| 1032 | 2033 | 20 | AURKB                     |
| 1032 | 2033 | 20 | AXL                       |
| 1032 | 2033 | 20 | BACH1                     |
| 1032 | 2033 | 20 | BAP1                      |
| 1032 | 2033 | 20 | BARD1                     |
| 1032 | 2033 | 20 | BCL-2                     |
| 1032 | 2033 | 20 | BCL2L2                    |
| 1032 | 2033 | 20 | BCL6                      |
| 1032 | 2033 | 20 | BCOR                      |
| 1032 | 2033 | 20 | BCORL1                    |
| 1032 | 2033 | 20 | BCR                       |
| 1032 | 2033 | 20 | BLM                       |
| 1032 | 2033 | 20 | BRAF                      |
| 1032 | 2033 | 20 | BRCA1                     |
| 1032 | 2033 | 20 | BRCA2                     |
| 1032 | 2033 | 20 | BRIP1                     |
| 1032 | 2033 | 20 | BTG1                      |
| 1032 | 2033 | 20 | BTK                       |
| 1032 | 2033 | 20 | C17orf39                  |
| 1032 | 2033 | 20 | CARD11                    |
| 1032 | 2033 | 20 | CASP8                     |
| 1032 | 2033 | 20 | CBFB                      |
| 1032 | 2033 | 20 | CBL                       |
| 1032 | 2033 | 20 | CCND1                     |
| 1032 | 2033 | 20 | CCND2                     |
| 1032 | 2033 | 20 | CCND3                     |
| 1032 | 2033 | 20 | CCNE1                     |
| 1032 | 2033 | 20 | CD79A                     |
| 1032 | 2033 | 20 | CD79B                     |
| 1032 | 2033 | 20 | CDC73                     |
| 1032 | 2033 | 20 | CDH1                      |
| 1032 | 2033 | 20 | CDK12                     |
| 1032 | 2033 | 20 | Cyclin dependent kinase-4 |

|      |      |    |                                       |
|------|------|----|---------------------------------------|
| 1032 | 2033 | 20 | CDK6                                  |
| 1032 | 2033 | 20 | CDK8                                  |
| 1032 | 2033 | 20 | CDKN1B                                |
| 1032 | 2033 | 20 | CDKN2A                                |
| 1032 | 2033 | 20 | CDKN2B                                |
| 1032 | 2033 | 20 | CDKN2C                                |
| 1032 | 2033 | 20 | CCAT/enhancer binding protein (CEBPA) |
| 1032 | 2033 | 20 | CHEK1                                 |
| 1032 | 2033 | 20 | CHEK2                                 |
| 1032 | 2033 | 20 | CHUK                                  |
| 1032 | 2033 | 20 | CIC                                   |
| 1032 | 2033 | 20 | CRBN                                  |
| 1032 | 2033 | 20 | CREBBP                                |
| 1032 | 2033 | 20 | CRKL                                  |
| 1032 | 2033 | 20 | CRLF2                                 |
| 1032 | 2033 | 20 | CSF1R                                 |
| 1032 | 2033 | 20 | CTCF                                  |
| 1032 | 2033 | 20 | CTNNA1                                |
| 1032 | 2033 | 20 | CTNNB1                                |
| 1032 | 2033 | 20 | CUL4A                                 |
| 1032 | 2033 | 20 | CUL4B                                 |
| 1032 | 2033 | 20 | CYP17A1                               |
| 1032 | 2033 | 20 | DAXX                                  |
| 1032 | 2033 | 20 | DDR2                                  |
| 1032 | 2033 | 20 | DIS3                                  |
| 1032 | 2033 | 20 | DNMT3A                                |
| 1032 | 2033 | 20 | DOT1L                                 |
| 1032 | 2033 | 20 | Epidermal Growth Factor Receptor      |
| 1032 | 2033 | 20 | EMSY                                  |
| 1032 | 2033 | 20 | EP300                                 |
| 1032 | 2033 | 20 | EPHA3                                 |
| 1032 | 2033 | 20 | EPHA5                                 |
| 1032 | 2033 | 20 | EPHB1                                 |
| 1032 | 2033 | 20 | ERBB2                                 |
| 1032 | 2033 | 20 | ERBB3                                 |
| 1032 | 2033 | 20 | ERBB4                                 |
| 1032 | 2033 | 20 | ERG                                   |
| 1032 | 2033 | 20 | Estrogen receptor 1                   |
| 1032 | 2033 | 20 | ETV1                                  |

|      |      |    |                                   |
|------|------|----|-----------------------------------|
| 1032 | 2033 | 20 | ETV4                              |
| 1032 | 2033 | 20 | ETV5                              |
| 1032 | 2033 | 20 | ETV6                              |
| 1032 | 2033 | 20 | EWSR1                             |
| 1032 | 2033 | 20 | EZH2                              |
| 1032 | 2033 | 20 | FAM123B(WTX)                      |
| 1032 | 2033 | 20 | FAM46C                            |
| 1032 | 2033 | 20 | FANCA                             |
| 1032 | 2033 | 20 | FANCC                             |
| 1032 | 2033 | 20 | FANCD2                            |
| 1032 | 2033 | 20 | FANCE                             |
| 1032 | 2033 | 20 | FANCF                             |
| 1032 | 2033 | 20 | FANCG                             |
| 1032 | 2033 | 20 | FANCI                             |
| 1032 | 2033 | 20 | FANCL                             |
| 1032 | 2033 | 20 | FANCM                             |
| 1032 | 2033 | 20 | FAT3                              |
| 1032 | 2033 | 20 | FBXW7                             |
| 1032 | 2033 | 20 | FGF10                             |
| 1032 | 2033 | 20 | FGF12                             |
| 1032 | 2033 | 20 | FGF14                             |
| 1032 | 2033 | 20 | Fibroblast growth factor 19       |
| 1032 | 2033 | 20 | Fibroblast growth factor 23       |
| 1032 | 2033 | 20 | Fibroblast growth factor 3        |
| 1032 | 2033 | 20 | FGF4                              |
| 1032 | 2033 | 20 | FGF6                              |
| 1032 | 2033 | 20 | FGF7                              |
| 1032 | 2033 | 20 | Fibroblast growth receptor 1      |
| 1032 | 2033 | 20 | Fibroblast growth receptor 2      |
| 1032 | 2033 | 20 | Fibroblast growth receptor 3      |
| 1032 | 2033 | 20 | Fibroblast growth receptor 4      |
| 1032 | 2033 | 20 | FLT1                              |
| 1032 | 2033 | 20 | Fms-like tyrosine kinase 3 (FLT3) |
| 1032 | 2033 | 20 | FLT4                              |
| 1032 | 2033 | 20 | FOXL2                             |
| 1032 | 2033 | 20 | GATA1                             |
| 1032 | 2033 | 20 | GATA2                             |
| 1032 | 2033 | 20 | GATA3                             |
| 1032 | 2033 | 20 | GNA11                             |
| 1032 | 2033 | 20 | GNA13                             |

|      |      |    |                                                  |
|------|------|----|--------------------------------------------------|
| 1032 | 2033 | 20 | GNAQ                                             |
| 1032 | 2033 | 20 | GNAS                                             |
| 1032 | 2033 | 20 | GPR124                                           |
| 1032 | 2033 | 20 | GRIN2A                                           |
| 1032 | 2033 | 20 | GSK3B                                            |
| 1032 | 2033 | 20 | Hepatocyte growth factor                         |
| 1032 | 2033 | 20 | HLA-A                                            |
| 1032 | 2033 | 20 | HRAS                                             |
| 1032 | 2033 | 20 | IDH1                                             |
| 1032 | 2033 | 20 | IDH2                                             |
| 1032 | 2033 | 20 | Insulin-like growth factor 1                     |
| 1032 | 2033 | 20 | Insulin growth factor 1 receptor                 |
| 1032 | 2033 | 20 | Insulin-like growth factor 2, also somatomedin A |
| 1032 | 2033 | 20 | IKBKE                                            |
| 1032 | 2033 | 20 | IKZF1                                            |
| 1032 | 2033 | 20 | IL7R                                             |
| 1032 | 2033 | 20 | INHBA                                            |
| 1032 | 2033 | 20 | IRF4                                             |
| 1032 | 2033 | 20 | IRS2                                             |
| 1032 | 2033 | 20 | JAK1                                             |
| 1032 | 2033 | 20 | JAK2                                             |
| 1032 | 2033 | 20 | JAK3                                             |
| 1032 | 2033 | 20 | JUN                                              |
| 1032 | 2033 | 20 | KDM5A                                            |
| 1032 | 2033 | 20 | KDM5C                                            |
| 1032 | 2033 | 20 | KDM6A                                            |
| 1032 | 2033 | 20 | KDR                                              |
| 1032 | 2033 | 20 | KEAP1                                            |
| 1032 | 2033 | 20 | KIT                                              |
| 1032 | 2033 | 20 | KLHL6                                            |
| 1032 | 2033 | 20 | KRAS                                             |
| 1032 | 2033 | 20 | LMO1                                             |
| 1032 | 2033 | 20 | LRP1B                                            |
| 1032 | 2033 | 20 | MAP2K1                                           |
| 1032 | 2033 | 20 | MAP2K2                                           |
| 1032 | 2033 | 20 | MAP2K4                                           |
| 1032 | 2033 | 20 | MAP3K1                                           |
| 1032 | 2033 | 20 | MAP3K13                                          |
| 1032 | 2033 | 20 | MCL1                                             |
| 1032 | 2033 | 20 | MDM2                                             |

|      |      |    |                                                |
|------|------|----|------------------------------------------------|
| 1032 | 2033 | 20 | MDM4                                           |
| 1032 | 2033 | 20 | MED12                                          |
| 1032 | 2033 | 20 | MEF2B                                          |
| 1032 | 2033 | 20 | MEN1                                           |
| 1032 | 2033 | 20 | MET                                            |
| 1032 | 2033 | 20 | Microphthalmia associated transcription factor |
| 1032 | 2033 | 20 | MLH1                                           |
| 1032 | 2033 | 20 | MLL                                            |
| 1032 | 2033 | 20 | MLL2                                           |
| 1032 | 2033 | 20 | MPL                                            |
| 1032 | 2033 | 20 | MRE11A                                         |
| 1032 | 2033 | 20 | MSH2                                           |
| 1032 | 2033 | 20 | MSH6                                           |
| 1032 | 2033 | 20 | MTOR                                           |
| 1032 | 2033 | 20 | MUTYH                                          |
| 1032 | 2033 | 20 | MYC                                            |
| 1032 | 2033 | 20 | MYCL1                                          |
| 1032 | 2033 | 20 | MYCN                                           |
| 1032 | 2033 | 20 | MYD88                                          |
| 1032 | 2033 | 20 | MYST3                                          |
| 1032 | 2033 | 20 | NBN                                            |
| 1032 | 2033 | 20 | NCOR1                                          |
| 1032 | 2033 | 20 | NF1                                            |
| 1032 | 2033 | 20 | NF2                                            |
| 1032 | 2033 | 20 | NFE2L2                                         |
| 1032 | 2033 | 20 | NFKBIA                                         |
| 1032 | 2033 | 20 | NKX2-1                                         |
| 1032 | 2033 | 20 | NOTCH1                                         |
| 1032 | 2033 | 20 | NOTCH2                                         |
| 1032 | 2033 | 20 | NOTCH3                                         |
| 1032 | 2033 | 20 | NOTCH4                                         |
| 1032 | 2033 | 20 | Nucleophosmin (NPM1)                           |
| 1032 | 2033 | 20 | NRAS                                           |
| 1032 | 2033 | 20 | NSD1                                           |
| 1032 | 2033 | 20 | NTRK1                                          |
| 1032 | 2033 | 20 | NTRK2                                          |
| 1032 | 2033 | 20 | NTRK3                                          |
| 1032 | 2033 | 20 | NUP93                                          |
| 1032 | 2033 | 20 | PAK3                                           |
| 1032 | 2033 | 20 | PAK7                                           |

|      |      |    |             |
|------|------|----|-------------|
| 1032 | 2033 | 20 | PALB2       |
| 1032 | 2033 | 20 | PARP1       |
| 1032 | 2033 | 20 | PARP2       |
| 1032 | 2033 | 20 | PARP3       |
| 1032 | 2033 | 20 | PARP4       |
| 1032 | 2033 | 20 | PAX5        |
| 1032 | 2033 | 20 | PBRM1       |
| 1032 | 2033 | 20 | PDGFRA      |
| 1032 | 2033 | 20 | PDGFRB      |
| 1032 | 2033 | 20 | PDK1        |
| 1032 | 2033 | 20 | PIK3C2G     |
| 1032 | 2033 | 20 | PIK3C3      |
| 1032 | 2033 | 20 | PIK3CG      |
| 1032 | 2033 | 20 | PIK3R1      |
| 1032 | 2033 | 20 | PIK3R2      |
| 1032 | 2033 | 20 | PMS2        |
| 1032 | 2033 | 20 | PNRC1       |
| 1032 | 2033 | 20 | PPP2R1A     |
| 1032 | 2033 | 20 | PRDM1       |
| 1032 | 2033 | 20 | PRKAR1A     |
| 1032 | 2033 | 20 | PRKDC       |
| 1032 | 2033 | 20 | PRSS8       |
| 1032 | 2033 | 20 | PTCH1       |
| 1032 | 2033 | 20 | PTPN11      |
| 1032 | 2033 | 20 | RAD50       |
| 1032 | 2033 | 20 | RAD51       |
| 1032 | 2033 | 20 | RAD51B      |
| 1032 | 2033 | 20 | RAD51C      |
| 1032 | 2033 | 20 | RAD51D      |
| 1032 | 2033 | 20 | RAD52       |
| 1032 | 2033 | 20 | RAD54L      |
| 1032 | 2033 | 20 | RAF1        |
| 1032 | 2033 | 20 | RARA        |
| 1032 | 2033 | 20 | 13q14(RB1)V |
| 1032 | 2033 | 20 | REL         |
| 1032 | 2033 | 20 | RET         |
| 1032 | 2033 | 20 | RICTOR      |
| 1032 | 2033 | 20 | RNF43       |
| 1032 | 2033 | 20 | ROS1        |
| 1032 | 2033 | 20 | RPA1        |

|      |      |    |                                   |
|------|------|----|-----------------------------------|
| 1032 | 2033 | 20 | RPTOR                             |
| 1032 | 2033 | 20 | RUNX1                             |
| 1032 | 2033 | 20 | RUNX1T1                           |
| 1032 | 2033 | 20 | SETD2                             |
| 1032 | 2033 | 20 | SF3B1                             |
| 1032 | 2033 | 20 | SH2B3                             |
| 1032 | 2033 | 20 | SMAD2                             |
| 1032 | 2033 | 20 | SMAD4                             |
| 1032 | 2033 | 20 | SMARCA4                           |
| 1032 | 2033 | 20 | SMARCB1                           |
| 1032 | 2033 | 20 | SMARCD1                           |
| 1032 | 2033 | 20 | SMO                               |
| 1032 | 2033 | 20 | SOCS1                             |
| 1032 | 2033 | 20 | SOX10                             |
| 1032 | 2033 | 20 | SOX2                              |
| 1032 | 2033 | 20 | SPEN                              |
| 1032 | 2033 | 20 | SPOP                              |
| 1032 | 2033 | 20 | SRC                               |
| 1032 | 2033 | 20 | STAG2                             |
| 1032 | 2033 | 20 | STAT4                             |
| 1032 | 2033 | 20 | STK11                             |
| 1032 | 2033 | 20 | SUFU                              |
| 1032 | 2033 | 20 | SYK                               |
| 1032 | 2033 | 20 | TBX3                              |
| 1032 | 2033 | 20 | TET2                              |
| 1032 | 2033 | 20 | TGFBR2                            |
| 1032 | 2033 | 20 | TIPARP                            |
| 1032 | 2033 | 20 | TMPRSS2                           |
| 1032 | 2033 | 20 | TNFAIP3                           |
| 1032 | 2033 | 20 | TNFRSF14                          |
| 1032 | 2033 | 20 | TOP1                              |
| 1032 | 2033 | 20 | TP53                              |
| 1032 | 2033 | 20 | TRRAP                             |
| 1032 | 2033 | 20 | Tuberous sclerosis complex 1 gene |
| 1032 | 2033 | 20 | Tuberous sclerosis complex 2 gene |
| 1032 | 2033 | 20 | TSHR                              |
| 1032 | 2033 | 20 | Von Hippel-Lindau                 |
| 1032 | 2033 | 20 | WISP3                             |
| 1032 | 2033 | 20 | WT1                               |

|      |      |    |         |
|------|------|----|---------|
| 1032 | 2033 | 20 | XPO1    |
| 1032 | 2033 | 20 | XRCC3   |
| 1032 | 2033 | 20 | ZNF217  |
| 1032 | 2033 | 20 | ZNF703  |
| 1033 | 2034 | 70 | ABL1    |
| 1033 | 2034 | 70 | AKT1    |
| 1033 | 2034 | 70 | AKT2    |
| 1033 | 2034 | 70 | AKT3    |
| 1033 | 2034 | 70 | ALK     |
| 1033 | 2034 | 70 | ALOX12B |
| 1033 | 2034 | 70 | APC     |
| 1033 | 2034 | 70 | APCDD1  |
| 1033 | 2034 | 70 | AR      |
| 1033 | 2034 | 70 | ARAF    |
| 1033 | 2034 | 70 | ARFRP1  |
| 1033 | 2034 | 70 | ARID1A  |
| 1033 | 2034 | 70 | ARID2   |
| 1033 | 2034 | 70 | ASXL1   |
| 1033 | 2034 | 70 | ATM     |
| 1033 | 2034 | 70 | ATR     |
| 1033 | 2034 | 70 | ATRX    |
| 1033 | 2034 | 70 | AURKA   |
| 1033 | 2034 | 70 | AURKB   |
| 1033 | 2034 | 70 | AXL     |
| 1033 | 2034 | 70 | BACH1   |
| 1033 | 2034 | 70 | BAP1    |
| 1033 | 2034 | 70 | BARD1   |
| 1033 | 2034 | 70 | BCL-2   |
| 1033 | 2034 | 70 | BCL2L2  |
| 1033 | 2034 | 70 | BCL6    |
| 1033 | 2034 | 70 | BCOR    |
| 1033 | 2034 | 70 | BCORL1  |
| 1033 | 2034 | 70 | BCR     |
| 1033 | 2034 | 70 | BLM     |
| 1033 | 2034 | 70 | BRAF    |
| 1033 | 2034 | 70 | BRCA1   |
| 1033 | 2034 | 70 | BRCA2   |
| 1033 | 2034 | 70 | BRIP1   |
| 1033 | 2034 | 70 | BTG1    |
| 1033 | 2034 | 70 | BTK     |



|      |      |    |                                       |
|------|------|----|---------------------------------------|
| 1033 | 2034 | 70 | C17orf39                              |
| 1033 | 2034 | 70 | CARD11                                |
| 1033 | 2034 | 70 | CASP8                                 |
| 1033 | 2034 | 70 | CBFB                                  |
| 1033 | 2034 | 70 | CBL                                   |
| 1033 | 2034 | 70 | CCND1                                 |
| 1033 | 2034 | 70 | CCND2                                 |
| 1033 | 2034 | 70 | CCND3                                 |
| 1033 | 2034 | 70 | CCNE1                                 |
| 1033 | 2034 | 70 | CD79A                                 |
| 1033 | 2034 | 70 | CD79B                                 |
| 1033 | 2034 | 70 | CDC73                                 |
| 1033 | 2034 | 70 | CDK12                                 |
| 1033 | 2034 | 70 | Cyclin dependent kinase-4             |
| 1033 | 2034 | 70 | CDK6                                  |
| 1033 | 2034 | 70 | CDK8                                  |
| 1033 | 2034 | 70 | CDKN1B                                |
| 1033 | 2034 | 70 | CDKN2A                                |
| 1033 | 2034 | 70 | CDKN2B                                |
| 1033 | 2034 | 70 | CDKN2C                                |
| 1033 | 2034 | 70 | CCAT/enhancer binding protein (CEBPA) |
| 1033 | 2034 | 70 | CHEK1                                 |
| 1033 | 2034 | 70 | CHEK2                                 |
| 1033 | 2034 | 70 | CHUK                                  |
| 1033 | 2034 | 70 | CIC                                   |
| 1033 | 2034 | 70 | CRBN                                  |
| 1033 | 2034 | 70 | CREBBP                                |
| 1033 | 2034 | 70 | CRKL                                  |
| 1033 | 2034 | 70 | CRLF2                                 |
| 1033 | 2034 | 70 | CSF1R                                 |
| 1033 | 2034 | 70 | CTCF                                  |
| 1033 | 2034 | 70 | CTNNA1                                |
| 1033 | 2034 | 70 | CTNNB1                                |
| 1033 | 2034 | 70 | CUL4A                                 |
| 1033 | 2034 | 70 | CUL4B                                 |
| 1033 | 2034 | 70 | CYP17A1                               |
| 1033 | 2034 | 70 | DAXX                                  |
| 1033 | 2034 | 70 | DDR2                                  |
| 1033 | 2034 | 70 | DIS3                                  |
| 1033 | 2034 | 70 | DNMT3A                                |

|      |      |    |                                  |
|------|------|----|----------------------------------|
| 1033 | 2034 | 70 | DOT1L                            |
| 1033 | 2034 | 70 | Epidermal Growth Factor Receptor |
| 1033 | 2034 | 70 | EMSY                             |
| 1033 | 2034 | 70 | EP300                            |
| 1033 | 2034 | 70 | EPHA3                            |
| 1033 | 2034 | 70 | EPHA5                            |
| 1033 | 2034 | 70 | EPHB1                            |
| 1033 | 2034 | 70 | ERBB2                            |
| 1033 | 2034 | 70 | ERBB3                            |
| 1033 | 2034 | 70 | ERBB4                            |
| 1033 | 2034 | 70 | ERG                              |
| 1033 | 2034 | 70 | Estrogen receptor 1              |
| 1033 | 2034 | 70 | ETV1                             |
| 1033 | 2034 | 70 | ETV4                             |
| 1033 | 2034 | 70 | ETV5                             |
| 1033 | 2034 | 70 | ETV6                             |
| 1033 | 2034 | 70 | EWSR1                            |
| 1033 | 2034 | 70 | EZH2                             |
| 1033 | 2034 | 70 | FAM123B(WTX)                     |
| 1033 | 2034 | 70 | FAM46C                           |
| 1033 | 2034 | 70 | FANCA                            |
| 1033 | 2034 | 70 | FANCC                            |
| 1033 | 2034 | 70 | FANCD2                           |
| 1033 | 2034 | 70 | FANCE                            |
| 1033 | 2034 | 70 | FANCF                            |
| 1033 | 2034 | 70 | FANCG                            |
| 1033 | 2034 | 70 | FANCI                            |
| 1033 | 2034 | 70 | FANCL                            |
| 1033 | 2034 | 70 | FANCM                            |
| 1033 | 2034 | 70 | FAT3                             |
| 1033 | 2034 | 70 | FBXW7                            |
| 1033 | 2034 | 70 | FGF10                            |
| 1033 | 2034 | 70 | FGF12                            |
| 1033 | 2034 | 70 | FGF14                            |
| 1033 | 2034 | 70 | Fibroblast growth factor 19      |
| 1033 | 2034 | 70 | Fibroblast growth factor 23      |
| 1033 | 2034 | 70 | Fibroblast growth factor 3       |
| 1033 | 2034 | 70 | FGF4                             |
| 1033 | 2034 | 70 | FGF6                             |
| 1033 | 2034 | 70 | FGF7                             |

|      |      |    |                                                  |
|------|------|----|--------------------------------------------------|
| 1033 | 2034 | 70 | Fibroblast growth receptor 1                     |
| 1033 | 2034 | 70 | Fibroblast growth receptor 2                     |
| 1033 | 2034 | 70 | Fibroblast growth receptor 3                     |
| 1033 | 2034 | 70 | Fibroblast growth receptor 4                     |
| 1033 | 2034 | 70 | FLT1                                             |
| 1033 | 2034 | 70 | Fms-like tyrosine kinase 3 (FLT3)                |
| 1033 | 2034 | 70 | FLT4                                             |
| 1033 | 2034 | 70 | FOXL2                                            |
| 1033 | 2034 | 70 | GATA1                                            |
| 1033 | 2034 | 70 | GATA2                                            |
| 1033 | 2034 | 70 | GATA3                                            |
| 1033 | 2034 | 70 | GNA11                                            |
| 1033 | 2034 | 70 | GNA13                                            |
| 1033 | 2034 | 70 | GNAQ                                             |
| 1033 | 2034 | 70 | GNAS                                             |
| 1033 | 2034 | 70 | GPR124                                           |
| 1033 | 2034 | 70 | GRIN2A                                           |
| 1033 | 2034 | 70 | GSK3B                                            |
| 1033 | 2034 | 70 | Hepatocyte growth factor                         |
| 1033 | 2034 | 70 | HLA-A                                            |
| 1033 | 2034 | 70 | HRAS                                             |
| 1033 | 2034 | 70 | IDH1                                             |
| 1033 | 2034 | 70 | IDH2                                             |
| 1033 | 2034 | 70 | Insulin-like growth factor 1                     |
| 1033 | 2034 | 70 | Insulin growth factor 1 receptor                 |
| 1033 | 2034 | 70 | Insulin-like growth factor 2, also somatomedin A |
| 1033 | 2034 | 70 | IKBKE                                            |
| 1033 | 2034 | 70 | IKZF1                                            |
| 1033 | 2034 | 70 | IL7R                                             |
| 1033 | 2034 | 70 | INHBA                                            |
| 1033 | 2034 | 70 | IRF4                                             |
| 1033 | 2034 | 70 | IRS2                                             |
| 1033 | 2034 | 70 | JAK1                                             |
| 1033 | 2034 | 70 | JAK2                                             |
| 1033 | 2034 | 70 | JAK3                                             |
| 1033 | 2034 | 70 | JUN                                              |
| 1033 | 2034 | 70 | KDM5A                                            |
| 1033 | 2034 | 70 | KDM5C                                            |
| 1033 | 2034 | 70 | KDM6A                                            |
| 1033 | 2034 | 70 | KDR                                              |

|      |      |    |                                                |
|------|------|----|------------------------------------------------|
| 1033 | 2034 | 70 | KEAP1                                          |
| 1033 | 2034 | 70 | KIT                                            |
| 1033 | 2034 | 70 | KLHL6                                          |
| 1033 | 2034 | 70 | KRAS                                           |
| 1033 | 2034 | 70 | LMO1                                           |
| 1033 | 2034 | 70 | LRP1B                                          |
| 1033 | 2034 | 70 | MAP2K1                                         |
| 1033 | 2034 | 70 | MAP2K2                                         |
| 1033 | 2034 | 70 | MAP2K4                                         |
| 1033 | 2034 | 70 | MAP3K13                                        |
| 1033 | 2034 | 70 | MCL1                                           |
| 1033 | 2034 | 70 | MDM2                                           |
| 1033 | 2034 | 70 | MDM4                                           |
| 1033 | 2034 | 70 | MED12                                          |
| 1033 | 2034 | 70 | MEF2B                                          |
| 1033 | 2034 | 70 | MEN1                                           |
| 1033 | 2034 | 70 | MET                                            |
| 1033 | 2034 | 70 | Microphthalmia associated transcription factor |
| 1033 | 2034 | 70 | MLH1                                           |
| 1033 | 2034 | 70 | MLL                                            |
| 1033 | 2034 | 70 | MLL2                                           |
| 1033 | 2034 | 70 | MPL                                            |
| 1033 | 2034 | 70 | MRE11A                                         |
| 1033 | 2034 | 70 | MSH2                                           |
| 1033 | 2034 | 70 | MSH6                                           |
| 1033 | 2034 | 70 | MUTYH                                          |
| 1033 | 2034 | 70 | MYC                                            |
| 1033 | 2034 | 70 | MYCL1                                          |
| 1033 | 2034 | 70 | MYCN                                           |
| 1033 | 2034 | 70 | MYD88                                          |
| 1033 | 2034 | 70 | MYST3                                          |
| 1033 | 2034 | 70 | NBN                                            |
| 1033 | 2034 | 70 | NCOR1                                          |
| 1033 | 2034 | 70 | NF1                                            |
| 1033 | 2034 | 70 | NF2                                            |
| 1033 | 2034 | 70 | NFE2L2                                         |
| 1033 | 2034 | 70 | NFKBIA                                         |
| 1033 | 2034 | 70 | NKX2-1                                         |
| 1033 | 2034 | 70 | NOTCH1                                         |
| 1033 | 2034 | 70 | NOTCH2                                         |

|      |      |    |                                |
|------|------|----|--------------------------------|
| 1033 | 2034 | 70 | NOTCH3                         |
| 1033 | 2034 | 70 | NOTCH4                         |
| 1033 | 2034 | 70 | Nucleophosmin (NPM1)           |
| 1033 | 2034 | 70 | NRAS                           |
| 1033 | 2034 | 70 | NSD1                           |
| 1033 | 2034 | 70 | NTRK1                          |
| 1033 | 2034 | 70 | NTRK2                          |
| 1033 | 2034 | 70 | NTRK3                          |
| 1033 | 2034 | 70 | NUP93                          |
| 1033 | 2034 | 70 | PAK3                           |
| 1033 | 2034 | 70 | PAK7                           |
| 1033 | 2034 | 70 | PALB2                          |
| 1033 | 2034 | 70 | PARP1                          |
| 1033 | 2034 | 70 | PARP2                          |
| 1033 | 2034 | 70 | PARP3                          |
| 1033 | 2034 | 70 | PARP4                          |
| 1033 | 2034 | 70 | PAX5                           |
| 1033 | 2034 | 70 | PBRM1                          |
| 1033 | 2034 | 70 | PDGFRA                         |
| 1033 | 2034 | 70 | PDGFRB                         |
| 1033 | 2034 | 70 | PDK1                           |
| 1033 | 2034 | 70 | PIK3C2G                        |
| 1033 | 2034 | 70 | PIK3C3                         |
| 1033 | 2034 | 70 | PIK3CG                         |
| 1033 | 2034 | 70 | PIK3R1                         |
| 1033 | 2034 | 70 | PIK3R2                         |
| 1033 | 2034 | 70 | PMS2                           |
| 1033 | 2034 | 70 | PNRC1                          |
| 1033 | 2034 | 70 | PPP2R1A                        |
| 1033 | 2034 | 70 | PRDM1                          |
| 1033 | 2034 | 70 | PRKAR1A                        |
| 1033 | 2034 | 70 | PRKDC                          |
| 1033 | 2034 | 70 | PRSS8                          |
| 1033 | 2034 | 70 | PTCH1                          |
| 1033 | 2034 | 70 | Phosphatase and Tensin homolog |
| 1033 | 2034 | 70 | PTPN11                         |
| 1033 | 2034 | 70 | RAD50                          |
| 1033 | 2034 | 70 | RAD51                          |
| 1033 | 2034 | 70 | RAD51B                         |
| 1033 | 2034 | 70 | RAD51C                         |

|      |      |    |             |
|------|------|----|-------------|
| 1033 | 2034 | 70 | RAD51D      |
| 1033 | 2034 | 70 | RAD52       |
| 1033 | 2034 | 70 | RAD54L      |
| 1033 | 2034 | 70 | RAF1        |
| 1033 | 2034 | 70 | RARA        |
| 1033 | 2034 | 70 | 13q14(RB1)V |
| 1033 | 2034 | 70 | REL         |
| 1033 | 2034 | 70 | RET         |
| 1033 | 2034 | 70 | RICTOR      |
| 1033 | 2034 | 70 | RNF43       |
| 1033 | 2034 | 70 | ROS1        |
| 1033 | 2034 | 70 | RPA1        |
| 1033 | 2034 | 70 | RPTOR       |
| 1033 | 2034 | 70 | RUNX1       |
| 1033 | 2034 | 70 | RUNX1T1     |
| 1033 | 2034 | 70 | SETD2       |
| 1033 | 2034 | 70 | SF3B1       |
| 1033 | 2034 | 70 | SH2B3       |
| 1033 | 2034 | 70 | SMAD2       |
| 1033 | 2034 | 70 | SMAD4       |
| 1033 | 2034 | 70 | SMARCA4     |
| 1033 | 2034 | 70 | SMARCB1     |
| 1033 | 2034 | 70 | SMARCD1     |
| 1033 | 2034 | 70 | SMO         |
| 1033 | 2034 | 70 | SOCS1       |
| 1033 | 2034 | 70 | SOX10       |
| 1033 | 2034 | 70 | SOX2        |
| 1033 | 2034 | 70 | SPEN        |
| 1033 | 2034 | 70 | SPOP        |
| 1033 | 2034 | 70 | SRC         |
| 1033 | 2034 | 70 | STAG2       |
| 1033 | 2034 | 70 | STAT4       |
| 1033 | 2034 | 70 | STK11       |
| 1033 | 2034 | 70 | SUFU        |
| 1033 | 2034 | 70 | SYK         |
| 1033 | 2034 | 70 | TBX3        |
| 1033 | 2034 | 70 | TET2        |
| 1033 | 2034 | 70 | TGFBR2      |
| 1033 | 2034 | 70 | TIPARP      |
| 1033 | 2034 | 70 | TMPRSS2     |

|      |      |    |                                   |
|------|------|----|-----------------------------------|
| 1033 | 2034 | 70 | TNFAIP3                           |
| 1033 | 2034 | 70 | TNFRSF14                          |
| 1033 | 2034 | 70 | TOP1                              |
| 1033 | 2034 | 70 | TP53                              |
| 1033 | 2034 | 70 | TRRAP                             |
| 1033 | 2034 | 70 | Tuberous sclerosis complex 1 gene |
| 1033 | 2034 | 70 | Tuberous sclerosis complex 2 gene |
| 1033 | 2034 | 70 | TSHR                              |
| 1033 | 2034 | 70 | Von Hippel-Lindau                 |
| 1033 | 2034 | 70 | WISP3                             |
| 1033 | 2034 | 70 | WT1                               |
| 1033 | 2034 | 70 | XPO1                              |
| 1033 | 2034 | 70 | XRCC3                             |
| 1033 | 2034 | 70 | ZNF217                            |
| 1033 | 2034 | 70 | ZNF703                            |
| 1057 | 2059 | 40 | ABL1                              |
| 1057 | 2059 | 40 | AKT1                              |
| 1057 | 2059 | 40 | AKT2                              |
| 1057 | 2059 | 40 | AKT3                              |
| 1057 | 2059 | 40 | ALK                               |
| 1057 | 2059 | 40 | ALOX12B                           |
| 1057 | 2059 | 40 | APC                               |
| 1057 | 2059 | 40 | APCDD1                            |
| 1057 | 2059 | 40 | AR                                |
| 1057 | 2059 | 40 | ARAF                              |
| 1057 | 2059 | 40 | ARFRP1                            |
| 1057 | 2059 | 40 | ARID1A                            |
| 1057 | 2059 | 40 | ARID2                             |
| 1057 | 2059 | 40 | ASXL1                             |
| 1057 | 2059 | 40 | ATM                               |
| 1057 | 2059 | 40 | ATR                               |
| 1057 | 2059 | 40 | ATRX                              |
| 1057 | 2059 | 40 | AURKA                             |
| 1057 | 2059 | 40 | AURKB                             |
| 1057 | 2059 | 40 | AXL                               |
| 1057 | 2059 | 40 | BACH1                             |
| 1057 | 2059 | 40 | BAP1                              |
| 1057 | 2059 | 40 | BARD1                             |
| 1057 | 2059 | 40 | BCL-2                             |

|      |      |    |                                       |
|------|------|----|---------------------------------------|
| 1057 | 2059 | 40 | BCL2L2                                |
| 1057 | 2059 | 40 | BCL6                                  |
| 1057 | 2059 | 40 | BCOR                                  |
| 1057 | 2059 | 40 | BCORL1                                |
| 1057 | 2059 | 40 | BCR                                   |
| 1057 | 2059 | 40 | BLM                                   |
| 1057 | 2059 | 40 | BRAF                                  |
| 1057 | 2059 | 40 | BRCA1                                 |
| 1057 | 2059 | 40 | BRCA2                                 |
| 1057 | 2059 | 40 | BRIP1                                 |
| 1057 | 2059 | 40 | BTG1                                  |
| 1057 | 2059 | 40 | BTK                                   |
| 1057 | 2059 | 40 | C17orf39                              |
| 1057 | 2059 | 40 | CARD11                                |
| 1057 | 2059 | 40 | CASP8                                 |
| 1057 | 2059 | 40 | CBFB                                  |
| 1057 | 2059 | 40 | CBL                                   |
| 1057 | 2059 | 40 | CCND1                                 |
| 1057 | 2059 | 40 | CCND2                                 |
| 1057 | 2059 | 40 | CCND3                                 |
| 1057 | 2059 | 40 | CCNE1                                 |
| 1057 | 2059 | 40 | CD79A                                 |
| 1057 | 2059 | 40 | CD79B                                 |
| 1057 | 2059 | 40 | CDC73                                 |
| 1057 | 2059 | 40 | CDH1                                  |
| 1057 | 2059 | 40 | CDK12                                 |
| 1057 | 2059 | 40 | CDK6                                  |
| 1057 | 2059 | 40 | CDK8                                  |
| 1057 | 2059 | 40 | CDKN1B                                |
| 1057 | 2059 | 40 | CDKN2A                                |
| 1057 | 2059 | 40 | CDKN2B                                |
| 1057 | 2059 | 40 | CDKN2C                                |
| 1057 | 2059 | 40 | CCAT/enhancer binding protein (CEBPA) |
| 1057 | 2059 | 40 | CHEK1                                 |
| 1057 | 2059 | 40 | CHEK2                                 |
| 1057 | 2059 | 40 | CHUK                                  |
| 1057 | 2059 | 40 | CIC                                   |
| 1057 | 2059 | 40 | CRBN                                  |
| 1057 | 2059 | 40 | CREBBP                                |
| 1057 | 2059 | 40 | CRKL                                  |



|      |      |    |                     |
|------|------|----|---------------------|
| 1057 | 2059 | 40 | CRLF2               |
| 1057 | 2059 | 40 | CSF1R               |
| 1057 | 2059 | 40 | CTCF                |
| 1057 | 2059 | 40 | CTNNA1              |
| 1057 | 2059 | 40 | CTNNB1              |
| 1057 | 2059 | 40 | CUL4A               |
| 1057 | 2059 | 40 | CUL4B               |
| 1057 | 2059 | 40 | CYP17A1             |
| 1057 | 2059 | 40 | DAXX                |
| 1057 | 2059 | 40 | DDR2                |
| 1057 | 2059 | 40 | DIS3                |
| 1057 | 2059 | 40 | DNMT3A              |
| 1057 | 2059 | 40 | DOT1L               |
| 1057 | 2059 | 40 | EMSY                |
| 1057 | 2059 | 40 | EP300               |
| 1057 | 2059 | 40 | EPHA3               |
| 1057 | 2059 | 40 | EPHA5               |
| 1057 | 2059 | 40 | EPHB1               |
| 1057 | 2059 | 40 | ERBB2               |
| 1057 | 2059 | 40 | ERBB3               |
| 1057 | 2059 | 40 | ERBB4               |
| 1057 | 2059 | 40 | ERG                 |
| 1057 | 2059 | 40 | Estrogen receptor 1 |
| 1057 | 2059 | 40 | ETV1                |
| 1057 | 2059 | 40 | ETV4                |
| 1057 | 2059 | 40 | ETV5                |
| 1057 | 2059 | 40 | ETV6                |
| 1057 | 2059 | 40 | EWSR1               |
| 1057 | 2059 | 40 | EZH2                |
| 1057 | 2059 | 40 | FAM123B(WTX)        |
| 1057 | 2059 | 40 | FAM46C              |
| 1057 | 2059 | 40 | FANCA               |
| 1057 | 2059 | 40 | FANCC               |
| 1057 | 2059 | 40 | FANCD2              |
| 1057 | 2059 | 40 | FANCE               |
| 1057 | 2059 | 40 | FANCF               |
| 1057 | 2059 | 40 | FANCG               |
| 1057 | 2059 | 40 | FANCI               |
| 1057 | 2059 | 40 | FANCL               |
| 1057 | 2059 | 40 | FANCM               |

|      |      |    |                                                  |
|------|------|----|--------------------------------------------------|
| 1057 | 2059 | 40 | FAT3                                             |
| 1057 | 2059 | 40 | FBXW7                                            |
| 1057 | 2059 | 40 | FGF10                                            |
| 1057 | 2059 | 40 | FGF12                                            |
| 1057 | 2059 | 40 | FGF14                                            |
| 1057 | 2059 | 40 | Fibroblast growth factor 19                      |
| 1057 | 2059 | 40 | Fibroblast growth factor 23                      |
| 1057 | 2059 | 40 | Fibroblast growth factor 3                       |
| 1057 | 2059 | 40 | FGF4                                             |
| 1057 | 2059 | 40 | FGF6                                             |
| 1057 | 2059 | 40 | FGF7                                             |
| 1057 | 2059 | 40 | Fibroblast growth receptor 1                     |
| 1057 | 2059 | 40 | Fibroblast growth receptor 2                     |
| 1057 | 2059 | 40 | Fibroblast growth receptor 3                     |
| 1057 | 2059 | 40 | Fibroblast growth receptor 4                     |
| 1057 | 2059 | 40 | FLT1                                             |
| 1057 | 2059 | 40 | Fms-like tyrosine kinase 3 (FLT3)                |
| 1057 | 2059 | 40 | FLT4                                             |
| 1057 | 2059 | 40 | FOXL2                                            |
| 1057 | 2059 | 40 | GATA1                                            |
| 1057 | 2059 | 40 | GATA2                                            |
| 1057 | 2059 | 40 | GATA3                                            |
| 1057 | 2059 | 40 | GNA11                                            |
| 1057 | 2059 | 40 | GNA13                                            |
| 1057 | 2059 | 40 | GNAQ                                             |
| 1057 | 2059 | 40 | GNAS                                             |
| 1057 | 2059 | 40 | GPR124                                           |
| 1057 | 2059 | 40 | GRIN2A                                           |
| 1057 | 2059 | 40 | GSK3B                                            |
| 1057 | 2059 | 40 | Hepatocyte growth factor                         |
| 1057 | 2059 | 40 | HLA-A                                            |
| 1057 | 2059 | 40 | HRAS                                             |
| 1057 | 2059 | 40 | IDH1                                             |
| 1057 | 2059 | 40 | IDH2                                             |
| 1057 | 2059 | 40 | Insulin-like growth factor 1                     |
| 1057 | 2059 | 40 | Insulin growth factor 1 receptor                 |
| 1057 | 2059 | 40 | Insulin-like growth factor 2, also somatomedin A |
| 1057 | 2059 | 40 | IKBKE                                            |
| 1057 | 2059 | 40 | IKZF1                                            |
| 1057 | 2059 | 40 | IL7R                                             |

|      |      |    |                                                |
|------|------|----|------------------------------------------------|
| 1057 | 2059 | 40 | INHBA                                          |
| 1057 | 2059 | 40 | IRF4                                           |
| 1057 | 2059 | 40 | IRS2                                           |
| 1057 | 2059 | 40 | JAK1                                           |
| 1057 | 2059 | 40 | JAK2                                           |
| 1057 | 2059 | 40 | JAK3                                           |
| 1057 | 2059 | 40 | JUN                                            |
| 1057 | 2059 | 40 | KDM5A                                          |
| 1057 | 2059 | 40 | KDM5C                                          |
| 1057 | 2059 | 40 | KDM6A                                          |
| 1057 | 2059 | 40 | KDR                                            |
| 1057 | 2059 | 40 | KEAP1                                          |
| 1057 | 2059 | 40 | KIT                                            |
| 1057 | 2059 | 40 | KLHL6                                          |
| 1057 | 2059 | 40 | KRAS                                           |
| 1057 | 2059 | 40 | LMO1                                           |
| 1057 | 2059 | 40 | LRP1B                                          |
| 1057 | 2059 | 40 | MAP2K1                                         |
| 1057 | 2059 | 40 | MAP2K2                                         |
| 1057 | 2059 | 40 | MAP2K4                                         |
| 1057 | 2059 | 40 | MAP3K1                                         |
| 1057 | 2059 | 40 | MAP3K13                                        |
| 1057 | 2059 | 40 | MCL1                                           |
| 1057 | 2059 | 40 | MDM2                                           |
| 1057 | 2059 | 40 | MDM4                                           |
| 1057 | 2059 | 40 | MED12                                          |
| 1057 | 2059 | 40 | MEF2B                                          |
| 1057 | 2059 | 40 | MEN1                                           |
| 1057 | 2059 | 40 | MET                                            |
| 1057 | 2059 | 40 | Microphthalmia associated transcription factor |
| 1057 | 2059 | 40 | MLH1                                           |
| 1057 | 2059 | 40 | MLL                                            |
| 1057 | 2059 | 40 | MLL2                                           |
| 1057 | 2059 | 40 | MPL                                            |
| 1057 | 2059 | 40 | MRE11A                                         |
| 1057 | 2059 | 40 | MSH2                                           |
| 1057 | 2059 | 40 | MSH6                                           |
| 1057 | 2059 | 40 | MTOR                                           |
| 1057 | 2059 | 40 | MUTYH                                          |
| 1057 | 2059 | 40 | MYC                                            |

|      |      |    |                      |
|------|------|----|----------------------|
| 1057 | 2059 | 40 | MYCL1                |
| 1057 | 2059 | 40 | MYCN                 |
| 1057 | 2059 | 40 | MYD88                |
| 1057 | 2059 | 40 | MYST3                |
| 1057 | 2059 | 40 | NBN                  |
| 1057 | 2059 | 40 | NCOR1                |
| 1057 | 2059 | 40 | NF2                  |
| 1057 | 2059 | 40 | NFE2L2               |
| 1057 | 2059 | 40 | NFKBIA               |
| 1057 | 2059 | 40 | NKX2-1               |
| 1057 | 2059 | 40 | NOTCH1               |
| 1057 | 2059 | 40 | NOTCH2               |
| 1057 | 2059 | 40 | NOTCH3               |
| 1057 | 2059 | 40 | NOTCH4               |
| 1057 | 2059 | 40 | Nucleophosmin (NPM1) |
| 1057 | 2059 | 40 | NRAS                 |
| 1057 | 2059 | 40 | NSD1                 |
| 1057 | 2059 | 40 | NTRK1                |
| 1057 | 2059 | 40 | NTRK2                |
| 1057 | 2059 | 40 | NTRK3                |
| 1057 | 2059 | 40 | NUP93                |
| 1057 | 2059 | 40 | PAK3                 |
| 1057 | 2059 | 40 | PAK7                 |
| 1057 | 2059 | 40 | PALB2                |
| 1057 | 2059 | 40 | PARP1                |
| 1057 | 2059 | 40 | PARP2                |
| 1057 | 2059 | 40 | PARP3                |
| 1057 | 2059 | 40 | PARP4                |
| 1057 | 2059 | 40 | PAX5                 |
| 1057 | 2059 | 40 | PBRM1                |
| 1057 | 2059 | 40 | PDGFRA               |
| 1057 | 2059 | 40 | PDGFRB               |
| 1057 | 2059 | 40 | PDK1                 |
| 1057 | 2059 | 40 | PIK3C2G              |
| 1057 | 2059 | 40 | PIK3C3               |
| 1057 | 2059 | 40 | PIK3CG               |
| 1057 | 2059 | 40 | PIK3R1               |
| 1057 | 2059 | 40 | PIK3R2               |
| 1057 | 2059 | 40 | PMS2                 |
| 1057 | 2059 | 40 | PNRC1                |

|      |      |    |                                |
|------|------|----|--------------------------------|
| 1057 | 2059 | 40 | PPP2R1A                        |
| 1057 | 2059 | 40 | PRDM1                          |
| 1057 | 2059 | 40 | PRKAR1A                        |
| 1057 | 2059 | 40 | PRKDC                          |
| 1057 | 2059 | 40 | PRSS8                          |
| 1057 | 2059 | 40 | PTCH1                          |
| 1057 | 2059 | 40 | Phosphatase and Tensin homolog |
| 1057 | 2059 | 40 | PTPN11                         |
| 1057 | 2059 | 40 | RAD50                          |
| 1057 | 2059 | 40 | RAD51                          |
| 1057 | 2059 | 40 | RAD51B                         |
| 1057 | 2059 | 40 | RAD51C                         |
| 1057 | 2059 | 40 | RAD51D                         |
| 1057 | 2059 | 40 | RAD52                          |
| 1057 | 2059 | 40 | RAD54L                         |
| 1057 | 2059 | 40 | RAF1                           |
| 1057 | 2059 | 40 | RARA                           |
| 1057 | 2059 | 40 | 13q14(RB1)V                    |
| 1057 | 2059 | 40 | REL                            |
| 1057 | 2059 | 40 | RET                            |
| 1057 | 2059 | 40 | RICTOR                         |
| 1057 | 2059 | 40 | RNF43                          |
| 1057 | 2059 | 40 | ROS1                           |
| 1057 | 2059 | 40 | RPA1                           |
| 1057 | 2059 | 40 | RPTOR                          |
| 1057 | 2059 | 40 | RUNX1                          |
| 1057 | 2059 | 40 | RUNX1T1                        |
| 1057 | 2059 | 40 | SETD2                          |
| 1057 | 2059 | 40 | SF3B1                          |
| 1057 | 2059 | 40 | SH2B3                          |
| 1057 | 2059 | 40 | SMAD2                          |
| 1057 | 2059 | 40 | SMAD4                          |
| 1057 | 2059 | 40 | SMARCA4                        |
| 1057 | 2059 | 40 | SMARCB1                        |
| 1057 | 2059 | 40 | SMARCD1                        |
| 1057 | 2059 | 40 | SMO                            |
| 1057 | 2059 | 40 | SOCS1                          |
| 1057 | 2059 | 40 | SOX10                          |
| 1057 | 2059 | 40 | SOX2                           |
| 1057 | 2059 | 40 | SPEN                           |

|      |      |    |                                   |
|------|------|----|-----------------------------------|
| 1057 | 2059 | 40 | SPOP                              |
| 1057 | 2059 | 40 | SRC                               |
| 1057 | 2059 | 40 | STAG2                             |
| 1057 | 2059 | 40 | STAT4                             |
| 1057 | 2059 | 40 | STK11                             |
| 1057 | 2059 | 40 | SUFU                              |
| 1057 | 2059 | 40 | SYK                               |
| 1057 | 2059 | 40 | TBX3                              |
| 1057 | 2059 | 40 | TET2                              |
| 1057 | 2059 | 40 | TGFBR2                            |
| 1057 | 2059 | 40 | TIPARP                            |
| 1057 | 2059 | 40 | TMPRSS2                           |
| 1057 | 2059 | 40 | TNFAIP3                           |
| 1057 | 2059 | 40 | TNFRSF14                          |
| 1057 | 2059 | 40 | TOP1                              |
| 1057 | 2059 | 40 | TP53                              |
| 1057 | 2059 | 40 | Tuberous sclerosis complex 1 gene |
| 1057 | 2059 | 40 | Tuberous sclerosis complex 2 gene |
| 1057 | 2059 | 40 | TSHR                              |
| 1057 | 2059 | 40 | Von Hippel-Lindau                 |
| 1057 | 2059 | 40 | WISP3                             |
| 1057 | 2059 | 40 | WT1                               |
| 1057 | 2059 | 40 | XPO1                              |
| 1057 | 2059 | 40 | XRCC3                             |
| 1057 | 2059 | 40 | ZNF217                            |
| 1057 | 2059 | 40 | ZNF703                            |
| 1057 |      | 40 | TRRAP                             |
| 1057 |      | 40 | Epidermal Growth Factor Receptor  |
| 1058 | 2060 | 90 | ABL1                              |
| 1058 | 2060 | 90 | ABL2                              |
| 1058 | 2060 | 90 | AKT1                              |
| 1058 | 2060 | 90 | AKT2                              |
| 1058 | 2060 | 90 | AKT3                              |
| 1058 | 2060 | 90 | ALK                               |
| 1058 | 2060 | 90 | APC                               |
| 1058 | 2060 | 90 | AR                                |
| 1058 | 2060 | 90 | ARAF                              |
| 1058 | 2060 | 90 | ARFRP1                            |

|      |      |    |                                       |
|------|------|----|---------------------------------------|
| 1058 | 2060 | 90 | ARID1A                                |
| 1058 | 2060 | 90 | ATM                                   |
| 1058 | 2060 | 90 | ATR                                   |
| 1058 | 2060 | 90 | AURKA                                 |
| 1058 | 2060 | 90 | AURKB                                 |
| 1058 | 2060 | 90 | BAP1                                  |
| 1058 | 2060 | 90 | BCL-2                                 |
| 1058 | 2060 | 90 | BCL2A1                                |
| 1058 | 2060 | 90 | BCL2L1                                |
| 1058 | 2060 | 90 | BCL2L2                                |
| 1058 | 2060 | 90 | BCL6                                  |
| 1058 | 2060 | 90 | BCR                                   |
| 1058 | 2060 | 90 | BRAF                                  |
| 1058 | 2060 | 90 | BRCA1                                 |
| 1058 | 2060 | 90 | BRCA2                                 |
| 1058 | 2060 | 90 | CARD11                                |
| 1058 | 2060 | 90 | CBL                                   |
| 1058 | 2060 | 90 | CCND1                                 |
| 1058 | 2060 | 90 | CCND2                                 |
| 1058 | 2060 | 90 | CCND3                                 |
| 1058 | 2060 | 90 | CCNE1                                 |
| 1058 | 2060 | 90 | CD79A                                 |
| 1058 | 2060 | 90 | CD79B                                 |
| 1058 | 2060 | 90 | CDH1                                  |
| 1058 | 2060 | 90 | CDH2                                  |
| 1058 | 2060 | 90 | CDH20                                 |
| 1058 | 2060 | 90 | CDH5                                  |
| 1058 | 2060 | 90 | Cyclin dependent kinase-4             |
| 1058 | 2060 | 90 | CDK6                                  |
| 1058 | 2060 | 90 | CDK8                                  |
| 1058 | 2060 | 90 | CDKN2A                                |
| 1058 | 2060 | 90 | CDKN2B                                |
| 1058 | 2060 | 90 | CDKN2C                                |
| 1058 | 2060 | 90 | CCAT/enhancer binding protein (CEBPA) |
| 1058 | 2060 | 90 | CHEK1                                 |
| 1058 | 2060 | 90 | CHEK2                                 |
| 1058 | 2060 | 90 | CRKL                                  |
| 1058 | 2060 | 90 | CRLF2                                 |
| 1058 | 2060 | 90 | CTNNB1                                |
| 1058 | 2060 | 90 | DDR2                                  |

|      |      |    |                                   |
|------|------|----|-----------------------------------|
| 1058 | 2060 | 90 | DNMT3A                            |
| 1058 | 2060 | 90 | DOT1L                             |
| 1058 | 2060 | 90 | Epidermal Growth Factor Receptor  |
| 1058 | 2060 | 90 | EPHA3                             |
| 1058 | 2060 | 90 | EPHA5                             |
| 1058 | 2060 | 90 | EPHA6                             |
| 1058 | 2060 | 90 | EPHA7                             |
| 1058 | 2060 | 90 | EPHB1                             |
| 1058 | 2060 | 90 | EPHB4                             |
| 1058 | 2060 | 90 | EPHB6                             |
| 1058 | 2060 | 90 | ERBB2                             |
| 1058 | 2060 | 90 | ERBB3                             |
| 1058 | 2060 | 90 | ERBB4                             |
| 1058 | 2060 | 90 | ERCC2                             |
| 1058 | 2060 | 90 | ERG                               |
| 1058 | 2060 | 90 | Estrogen receptor 1               |
| 1058 | 2060 | 90 | ETV1                              |
| 1058 | 2060 | 90 | ETV4                              |
| 1058 | 2060 | 90 | ETV5                              |
| 1058 | 2060 | 90 | ETV6                              |
| 1058 | 2060 | 90 | EWSR1                             |
| 1058 | 2060 | 90 | EZH2                              |
| 1058 | 2060 | 90 | FANCA                             |
| 1058 | 2060 | 90 | FBXW7                             |
| 1058 | 2060 | 90 | Fibroblast growth receptor 1      |
| 1058 | 2060 | 90 | Fibroblast growth receptor 2      |
| 1058 | 2060 | 90 | Fibroblast growth receptor 3      |
| 1058 | 2060 | 90 | Fibroblast growth receptor 4      |
| 1058 | 2060 | 90 | FLT1                              |
| 1058 | 2060 | 90 | Fms-like tyrosine kinase 3 (FLT3) |
| 1058 | 2060 | 90 | FLT4                              |
| 1058 | 2060 | 90 | FOXP4                             |
| 1058 | 2060 | 90 | GATA1                             |
| 1058 | 2060 | 90 | GNA11                             |
| 1058 | 2060 | 90 | GNAQ                              |
| 1058 | 2060 | 90 | GNAS                              |
| 1058 | 2060 | 90 | GPR124                            |
| 1058 | 2060 | 90 | GUCY1A2                           |
| 1058 | 2060 | 90 | HOXA3                             |
| 1058 | 2060 | 90 | HRAS                              |



|      |      |    |                                                |
|------|------|----|------------------------------------------------|
| 1058 | 2060 | 90 | HSP90AA1                                       |
| 1058 | 2060 | 90 | IDH1                                           |
| 1058 | 2060 | 90 | IDH2                                           |
| 1058 | 2060 | 90 | Insulin growth factor 1 receptor               |
| 1058 | 2060 | 90 | IGF2R                                          |
| 1058 | 2060 | 90 | IKBKE                                          |
| 1058 | 2060 | 90 | IKZF1                                          |
| 1058 | 2060 | 90 | INHBA                                          |
| 1058 | 2060 | 90 | INSR                                           |
| 1058 | 2060 | 90 | IRS2                                           |
| 1058 | 2060 | 90 | JAK1                                           |
| 1058 | 2060 | 90 | JAK2                                           |
| 1058 | 2060 | 90 | JAK3                                           |
| 1058 | 2060 | 90 | JUN                                            |
| 1058 | 2060 | 90 | KDM6A                                          |
| 1058 | 2060 | 90 | KDR                                            |
| 1058 | 2060 | 90 | KIT                                            |
| 1058 | 2060 | 90 | KRAS                                           |
| 1058 | 2060 | 90 | LRP1B                                          |
| 1058 | 2060 | 90 | LRP6                                           |
| 1058 | 2060 | 90 | LTK                                            |
| 1058 | 2060 | 90 | MAP2K1                                         |
| 1058 | 2060 | 90 | MAP2K2                                         |
| 1058 | 2060 | 90 | MAP2K4                                         |
| 1058 | 2060 | 90 | MCL1                                           |
| 1058 | 2060 | 90 | MDM2                                           |
| 1058 | 2060 | 90 | MDM4                                           |
| 1058 | 2060 | 90 | MEN1                                           |
| 1058 | 2060 | 90 | MET                                            |
| 1058 | 2060 | 90 | Microphthalmia associated transcription factor |
| 1058 | 2060 | 90 | MLH1                                           |
| 1058 | 2060 | 90 | MLL                                            |
| 1058 | 2060 | 90 | MPL                                            |
| 1058 | 2060 | 90 | MRE11A                                         |
| 1058 | 2060 | 90 | MSH2                                           |
| 1058 | 2060 | 90 | MSH6                                           |
| 1058 | 2060 | 90 | MTOR                                           |
| 1058 | 2060 | 90 | MUTYH                                          |
| 1058 | 2060 | 90 | MYC                                            |
| 1058 | 2060 | 90 | MYCL1                                          |

|      |      |    |                                |
|------|------|----|--------------------------------|
| 1058 | 2060 | 90 | MYCN                           |
| 1058 | 2060 | 90 | NF1                            |
| 1058 | 2060 | 90 | NF2                            |
| 1058 | 2060 | 90 | NKX2-1                         |
| 1058 | 2060 | 90 | NOTCH1                         |
| 1058 | 2060 | 90 | Nucleophosmin (NPM1)           |
| 1058 | 2060 | 90 | NRAS                           |
| 1058 | 2060 | 90 | NTRK1                          |
| 1058 | 2060 | 90 | NTRK2                          |
| 1058 | 2060 | 90 | NTRK3                          |
| 1058 | 2060 | 90 | PAK3                           |
| 1058 | 2060 | 90 | PAX5                           |
| 1058 | 2060 | 90 | PDGFRA                         |
| 1058 | 2060 | 90 | PDGFRB                         |
| 1058 | 2060 | 90 | PHLPP2                         |
| 1058 | 2060 | 90 | PIK3CG                         |
| 1058 | 2060 | 90 | PIK3R1                         |
| 1058 | 2060 | 90 | PKHD1                          |
| 1058 | 2060 | 90 | PLCG1                          |
| 1058 | 2060 | 90 | PRKDC                          |
| 1058 | 2060 | 90 | PTCH1                          |
| 1058 | 2060 | 90 | PTCH2                          |
| 1058 | 2060 | 90 | Phosphatase and Tensin homolog |
| 1058 | 2060 | 90 | PTPN11                         |
| 1058 | 2060 | 90 | PTPRD                          |
| 1058 | 2060 | 90 | RAF1                           |
| 1058 | 2060 | 90 | RARA                           |
| 1058 | 2060 | 90 | 13q14(RB1)V                    |
| 1058 | 2060 | 90 | RET                            |
| 1058 | 2060 | 90 | RICTOR                         |
| 1058 | 2060 | 90 | RPTOR                          |
| 1058 | 2060 | 90 | RUNX1                          |
| 1058 | 2060 | 90 | SMAD2                          |
| 1058 | 2060 | 90 | SMAD3                          |
| 1058 | 2060 | 90 | SMAD4                          |
| 1058 | 2060 | 90 | SMARCA4                        |
| 1058 | 2060 | 90 | SMARCB1                        |
| 1058 | 2060 | 90 | SMO                            |
| 1058 | 2060 | 90 | SOX10                          |
| 1058 | 2060 | 90 | SOX2                           |

|      |      |    |                                   |
|------|------|----|-----------------------------------|
| 1058 | 2060 | 90 | SRC                               |
| 1058 | 2060 | 90 | STAT3                             |
| 1058 | 2060 | 90 | STK11                             |
| 1058 | 2060 | 90 | SUFU                              |
| 1058 | 2060 | 90 | TBX22                             |
| 1058 | 2060 | 90 | TET2                              |
| 1058 | 2060 | 90 | TGFBR2                            |
| 1058 | 2060 | 90 | TMPRSS2                           |
| 1058 | 2060 | 90 | TNFAIP3                           |
| 1058 | 2060 | 90 | TNKS                              |
| 1058 | 2060 | 90 | TNKS2                             |
| 1058 | 2060 | 90 | TOP1                              |
| 1058 | 2060 | 90 | TP53                              |
| 1058 | 2060 | 90 | Tuberous sclerosis complex 1 gene |
| 1058 | 2060 | 90 | Tuberous sclerosis complex 2 gene |
| 1058 | 2060 | 90 | USP9X                             |
| 1058 | 2060 | 90 | Von Hippel-Lindau                 |
| 1058 | 2060 | 90 | WT1                               |
| 1059 | 2061 | 20 | ABL1                              |
| 1059 | 2061 | 20 | ABL2                              |
| 1059 | 2061 | 20 | AKT1                              |
| 1059 | 2061 | 20 | AKT2                              |
| 1059 | 2061 | 20 | AKT3                              |
| 1059 | 2061 | 20 | ALK                               |
| 1059 | 2061 | 20 | APC                               |
| 1059 | 2061 | 20 | AR                                |
| 1059 | 2061 | 20 | ARAF                              |
| 1059 | 2061 | 20 | ARFRP1                            |
| 1059 | 2061 | 20 | ARID1A                            |
| 1059 | 2061 | 20 | ATM                               |
| 1059 | 2061 | 20 | ATR                               |
| 1059 | 2061 | 20 | AURKA                             |
| 1059 | 2061 | 20 | AURKB                             |
| 1059 | 2061 | 20 | BAP1                              |
| 1059 | 2061 | 20 | BCL-2                             |
| 1059 | 2061 | 20 | BCL2A1                            |
| 1059 | 2061 | 20 | BCL2L1                            |
| 1059 | 2061 | 20 | BCL2L2                            |
| 1059 | 2061 | 20 | BCL6                              |

|      |      |    |                                       |
|------|------|----|---------------------------------------|
| 1059 | 2061 | 20 | BCR                                   |
| 1059 | 2061 | 20 | BRAF                                  |
| 1059 | 2061 | 20 | BRCA1                                 |
| 1059 | 2061 | 20 | BRCA2                                 |
| 1059 | 2061 | 20 | CARD11                                |
| 1059 | 2061 | 20 | CBL                                   |
| 1059 | 2061 | 20 | CCND1                                 |
| 1059 | 2061 | 20 | CCND2                                 |
| 1059 | 2061 | 20 | CCND3                                 |
| 1059 | 2061 | 20 | CCNE1                                 |
| 1059 | 2061 | 20 | CD79A                                 |
| 1059 | 2061 | 20 | CD79B                                 |
| 1059 | 2061 | 20 | CDH1                                  |
| 1059 | 2061 | 20 | CDH2                                  |
| 1059 | 2061 | 20 | CDH20                                 |
| 1059 | 2061 | 20 | CDH5                                  |
| 1059 | 2061 | 20 | Cyclin dependent kinase-4             |
| 1059 | 2061 | 20 | CDK6                                  |
| 1059 | 2061 | 20 | CDK8                                  |
| 1059 | 2061 | 20 | CDKN2A                                |
| 1059 | 2061 | 20 | CDKN2B                                |
| 1059 | 2061 | 20 | CDKN2C                                |
| 1059 | 2061 | 20 | CCAT/enhancer binding protein (CEBPA) |
| 1059 | 2061 | 20 | CHEK1                                 |
| 1059 | 2061 | 20 | CHEK2                                 |
| 1059 | 2061 | 20 | CRKL                                  |
| 1059 | 2061 | 20 | CRLF2                                 |
| 1059 | 2061 | 20 | CTNNB1                                |
| 1059 | 2061 | 20 | DDR2                                  |
| 1059 | 2061 | 20 | DNMT3A                                |
| 1059 | 2061 | 20 | DOT1L                                 |
| 1059 | 2061 | 20 | Epidermal Growth Factor Receptor      |
| 1059 | 2061 | 20 | EPHA3                                 |
| 1059 | 2061 | 20 | EPHA5                                 |
| 1059 | 2061 | 20 | EPHA6                                 |
| 1059 | 2061 | 20 | EPHA7                                 |
| 1059 | 2061 | 20 | EPHB1                                 |
| 1059 | 2061 | 20 | EPHB4                                 |
| 1059 | 2061 | 20 | EPHB6                                 |

|      |      |    |                                   |
|------|------|----|-----------------------------------|
| 1059 | 2061 | 20 | ERBB2                             |
| 1059 | 2061 | 20 | ERBB3                             |
| 1059 | 2061 | 20 | ERBB4                             |
| 1059 | 2061 | 20 | ERCC2                             |
| 1059 | 2061 | 20 | ERG                               |
| 1059 | 2061 | 20 | Estrogen receptor 1               |
| 1059 | 2061 | 20 | ETV1                              |
| 1059 | 2061 | 20 | ETV4                              |
| 1059 | 2061 | 20 | ETV5                              |
| 1059 | 2061 | 20 | ETV6                              |
| 1059 | 2061 | 20 | EWSR1                             |
| 1059 | 2061 | 20 | EZH2                              |
| 1059 | 2061 | 20 | FANCA                             |
| 1059 | 2061 | 20 | FBXW7                             |
| 1059 | 2061 | 20 | Fibroblast growth receptor 1      |
| 1059 | 2061 | 20 | Fibroblast growth receptor 2      |
| 1059 | 2061 | 20 | Fibroblast growth receptor 3      |
| 1059 | 2061 | 20 | Fibroblast growth receptor 4      |
| 1059 | 2061 | 20 | FLT1                              |
| 1059 | 2061 | 20 | Fms-like tyrosine kinase 3 (FLT3) |
| 1059 | 2061 | 20 | FLT4                              |
| 1059 | 2061 | 20 | FOXP4                             |
| 1059 | 2061 | 20 | GATA1                             |
| 1059 | 2061 | 20 | GNA11                             |
| 1059 | 2061 | 20 | GNAQ                              |
| 1059 | 2061 | 20 | GNAS                              |
| 1059 | 2061 | 20 | GPR124                            |
| 1059 | 2061 | 20 | GUCY1A2                           |
| 1059 | 2061 | 20 | HOXA3                             |
| 1059 | 2061 | 20 | HRAS                              |
| 1059 | 2061 | 20 | HSP90AA1                          |
| 1059 | 2061 | 20 | IDH1                              |
| 1059 | 2061 | 20 | IDH2                              |
| 1059 | 2061 | 20 | Insulin growth factor 1 receptor  |
| 1059 | 2061 | 20 | IGF2R                             |
| 1059 | 2061 | 20 | IKBKE                             |
| 1059 | 2061 | 20 | IKZF1                             |
| 1059 | 2061 | 20 | INHBA                             |
| 1059 | 2061 | 20 | INSR                              |
| 1059 | 2061 | 20 | IRS2                              |

|      |      |    |                                                |
|------|------|----|------------------------------------------------|
| 1059 | 2061 | 20 | JAK1                                           |
| 1059 | 2061 | 20 | JAK2                                           |
| 1059 | 2061 | 20 | JAK3                                           |
| 1059 | 2061 | 20 | JUN                                            |
| 1059 | 2061 | 20 | KDM6A                                          |
| 1059 | 2061 | 20 | KDR                                            |
| 1059 | 2061 | 20 | KIT                                            |
| 1059 | 2061 | 20 | KRAS                                           |
| 1059 | 2061 | 20 | LRP1B                                          |
| 1059 | 2061 | 20 | LRP6                                           |
| 1059 | 2061 | 20 | LTK                                            |
| 1059 | 2061 | 20 | MAP2K1                                         |
| 1059 | 2061 | 20 | MAP2K2                                         |
| 1059 | 2061 | 20 | MAP2K4                                         |
| 1059 | 2061 | 20 | MCL1                                           |
| 1059 | 2061 | 20 | MDM2                                           |
| 1059 | 2061 | 20 | MDM4                                           |
| 1059 | 2061 | 20 | MEN1                                           |
| 1059 | 2061 | 20 | MET                                            |
| 1059 | 2061 | 20 | Microphthalmia associated transcription factor |
| 1059 | 2061 | 20 | MLH1                                           |
| 1059 | 2061 | 20 | MLL                                            |
| 1059 | 2061 | 20 | MPL                                            |
| 1059 | 2061 | 20 | MRE11A                                         |
| 1059 | 2061 | 20 | MSH2                                           |
| 1059 | 2061 | 20 | MSH6                                           |
| 1059 | 2061 | 20 | MTOR                                           |
| 1059 | 2061 | 20 | MUTYH                                          |
| 1059 | 2061 | 20 | MYC                                            |
| 1059 | 2061 | 20 | MYCL1                                          |
| 1059 | 2061 | 20 | MYCN                                           |
| 1059 | 2061 | 20 | NF1                                            |
| 1059 | 2061 | 20 | NF2                                            |
| 1059 | 2061 | 20 | NKX2-1                                         |
| 1059 | 2061 | 20 | NOTCH1                                         |
| 1059 | 2061 | 20 | Nucleophosmin (NPM1)                           |
| 1059 | 2061 | 20 | NRAS                                           |
| 1059 | 2061 | 20 | NTRK1                                          |
| 1059 | 2061 | 20 | NTRK2                                          |
| 1059 | 2061 | 20 | NTRK3                                          |

|      |      |    |                                |
|------|------|----|--------------------------------|
| 1059 | 2061 | 20 | PAK3                           |
| 1059 | 2061 | 20 | PDGFRA                         |
| 1059 | 2061 | 20 | PDGFRB                         |
| 1059 | 2061 | 20 | PHLPP2                         |
| 1059 | 2061 | 20 | PIK3CG                         |
| 1059 | 2061 | 20 | PIK3R1                         |
| 1059 | 2061 | 20 | PKHD1                          |
| 1059 | 2061 | 20 | PLCG1                          |
| 1059 | 2061 | 20 | PRKDC                          |
| 1059 | 2061 | 20 | PTCH1                          |
| 1059 | 2061 | 20 | PTCH2                          |
| 1059 | 2061 | 20 | Phosphatase and Tensin homolog |
| 1059 | 2061 | 20 | PTPN11                         |
| 1059 | 2061 | 20 | PTPRD                          |
| 1059 | 2061 | 20 | RAF1                           |
| 1059 | 2061 | 20 | RARA                           |
| 1059 | 2061 | 20 | 13q14(RB1)V                    |
| 1059 | 2061 | 20 | RET                            |
| 1059 | 2061 | 20 | RICTOR                         |
| 1059 | 2061 | 20 | RPTOR                          |
| 1059 | 2061 | 20 | RUNX1                          |
| 1059 | 2061 | 20 | SMAD2                          |
| 1059 | 2061 | 20 | SMAD3                          |
| 1059 | 2061 | 20 | SMAD4                          |
| 1059 | 2061 | 20 | SMARCA4                        |
| 1059 | 2061 | 20 | SMARCB1                        |
| 1059 | 2061 | 20 | SMO                            |
| 1059 | 2061 | 20 | SOX10                          |
| 1059 | 2061 | 20 | SOX2                           |
| 1059 | 2061 | 20 | SRC                            |
| 1059 | 2061 | 20 | STAT3                          |
| 1059 | 2061 | 20 | STK11                          |
| 1059 | 2061 | 20 | SUFU                           |
| 1059 | 2061 | 20 | TBX22                          |
| 1059 | 2061 | 20 | TET2                           |
| 1059 | 2061 | 20 | TGFBR2                         |
| 1059 | 2061 | 20 | TMPRSS2                        |
| 1059 | 2061 | 20 | TNFAIP3                        |
| 1059 | 2061 | 20 | TNKS                           |
| 1059 | 2061 | 20 | TNKS2                          |

|      |      |    |                                   |
|------|------|----|-----------------------------------|
| 1059 | 2061 | 20 | TOP1                              |
| 1059 | 2061 | 20 | TP53                              |
| 1059 | 2061 | 20 | Tuberous sclerosis complex 1 gene |
| 1059 | 2061 | 20 | Tuberous sclerosis complex 2 gene |
| 1059 | 2061 | 20 | USP9X                             |
| 1059 | 2061 | 20 | Von Hippel-Lindau                 |
| 1059 | 2061 | 20 | WT1                               |
| 1060 | 2062 | 40 | ABL1                              |
| 1060 | 2062 | 40 | AKT1                              |
| 1060 | 2062 | 40 | AKT2                              |
| 1060 | 2062 | 40 | AKT3                              |
| 1060 | 2062 | 40 | ALK                               |
| 1060 | 2062 | 40 | ALOX12B                           |
| 1060 | 2062 | 40 | APC                               |
| 1060 | 2062 | 40 | APCDD1                            |
| 1060 | 2062 | 40 | AR                                |
| 1060 | 2062 | 40 | ARAF                              |
| 1060 | 2062 | 40 | ARFRP1                            |
| 1060 | 2062 | 40 | ARID1A                            |
| 1060 | 2062 | 40 | ARID2                             |
| 1060 | 2062 | 40 | ASXL1                             |
| 1060 | 2062 | 40 | ATM                               |
| 1060 | 2062 | 40 | ATR                               |
| 1060 | 2062 | 40 | ATRX                              |
| 1060 | 2062 | 40 | AURKA                             |
| 1060 | 2062 | 40 | AURKB                             |
| 1060 | 2062 | 40 | AXL                               |
| 1060 | 2062 | 40 | BACH1                             |
| 1060 | 2062 | 40 | BAP1                              |
| 1060 | 2062 | 40 | BARD1                             |
| 1060 | 2062 | 40 | BCL-2                             |
| 1060 | 2062 | 40 | BCL2L2                            |
| 1060 | 2062 | 40 | BCL6                              |
| 1060 | 2062 | 40 | BCOR                              |
| 1060 | 2062 | 40 | BCORL1                            |
| 1060 | 2062 | 40 | BCR                               |
| 1060 | 2062 | 40 | BLM                               |
| 1060 | 2062 | 40 | BRAF                              |
| 1060 | 2062 | 40 | BRCA1                             |



|      |      |    |                                       |
|------|------|----|---------------------------------------|
| 1060 | 2062 | 40 | BRCA2                                 |
| 1060 | 2062 | 40 | BRIP1                                 |
| 1060 | 2062 | 40 | BTG1                                  |
| 1060 | 2062 | 40 | BTK                                   |
| 1060 | 2062 | 40 | C17orf39                              |
| 1060 | 2062 | 40 | CARD11                                |
| 1060 | 2062 | 40 | CASP8                                 |
| 1060 | 2062 | 40 | CBFB                                  |
| 1060 | 2062 | 40 | CBL                                   |
| 1060 | 2062 | 40 | CCND1                                 |
| 1060 | 2062 | 40 | CCND2                                 |
| 1060 | 2062 | 40 | CCND3                                 |
| 1060 | 2062 | 40 | CCNE1                                 |
| 1060 | 2062 | 40 | CD79A                                 |
| 1060 | 2062 | 40 | CD79B                                 |
| 1060 | 2062 | 40 | CDC73                                 |
| 1060 | 2062 | 40 | CDH1                                  |
| 1060 | 2062 | 40 | CDK12                                 |
| 1060 | 2062 | 40 | Cyclin dependent kinase-4             |
| 1060 | 2062 | 40 | CDK6                                  |
| 1060 | 2062 | 40 | CDK8                                  |
| 1060 | 2062 | 40 | CDKN1B                                |
| 1060 | 2062 | 40 | CDKN2A                                |
| 1060 | 2062 | 40 | CDKN2B                                |
| 1060 | 2062 | 40 | CDKN2C                                |
| 1060 | 2062 | 40 | CCAT/enhancer binding protein (CEBPA) |
| 1060 | 2062 | 40 | CHEK1                                 |
| 1060 | 2062 | 40 | CHEK2                                 |
| 1060 | 2062 | 40 | CHUK                                  |
| 1060 | 2062 | 40 | CIC                                   |
| 1060 | 2062 | 40 | CRBN                                  |
| 1060 | 2062 | 40 | CREBBP                                |
| 1060 | 2062 | 40 | CRKL                                  |
| 1060 | 2062 | 40 | CRLF2                                 |
| 1060 | 2062 | 40 | CSF1R                                 |
| 1060 | 2062 | 40 | CTCF                                  |
| 1060 | 2062 | 40 | CTNNA1                                |
| 1060 | 2062 | 40 | CTNNB1                                |
| 1060 | 2062 | 40 | CUL4A                                 |
| 1060 | 2062 | 40 | CUL4B                                 |

|      |      |    |                                  |
|------|------|----|----------------------------------|
| 1060 | 2062 | 40 | CYP17A1                          |
| 1060 | 2062 | 40 | DAXX                             |
| 1060 | 2062 | 40 | DDR2                             |
| 1060 | 2062 | 40 | DIS3                             |
| 1060 | 2062 | 40 | DNMT3A                           |
| 1060 | 2062 | 40 | DOT1L                            |
| 1060 | 2062 | 40 | Epidermal Growth Factor Receptor |
| 1060 | 2062 | 40 | EMSY                             |
| 1060 | 2062 | 40 | EP300                            |
| 1060 | 2062 | 40 | EPHA3                            |
| 1060 | 2062 | 40 | EPHA5                            |
| 1060 | 2062 | 40 | EPHB1                            |
| 1060 | 2062 | 40 | ERBB2                            |
| 1060 | 2062 | 40 | ERBB3                            |
| 1060 | 2062 | 40 | ERBB4                            |
| 1060 | 2062 | 40 | ERG                              |
| 1060 | 2062 | 40 | ETV1                             |
| 1060 | 2062 | 40 | ETV4                             |
| 1060 | 2062 | 40 | ETV5                             |
| 1060 | 2062 | 40 | ETV6                             |
| 1060 | 2062 | 40 | EWSR1                            |
| 1060 | 2062 | 40 | EZH2                             |
| 1060 | 2062 | 40 | FAM123B(WTX)                     |
| 1060 | 2062 | 40 | FAM46C                           |
| 1060 | 2062 | 40 | FANCA                            |
| 1060 | 2062 | 40 | FANCC                            |
| 1060 | 2062 | 40 | FANCD2                           |
| 1060 | 2062 | 40 | FANCE                            |
| 1060 | 2062 | 40 | FANCF                            |
| 1060 | 2062 | 40 | FANCG                            |
| 1060 | 2062 | 40 | FANCI                            |
| 1060 | 2062 | 40 | FANCL                            |
| 1060 | 2062 | 40 | FANCM                            |
| 1060 | 2062 | 40 | FAT3                             |
| 1060 | 2062 | 40 | FBXW7                            |
| 1060 | 2062 | 40 | FGF10                            |
| 1060 | 2062 | 40 | FGF12                            |
| 1060 | 2062 | 40 | FGF14                            |
| 1060 | 2062 | 40 | Fibroblast growth factor 19      |
| 1060 | 2062 | 40 | Fibroblast growth factor 23      |

|      |      |    |                                                  |
|------|------|----|--------------------------------------------------|
| 1060 | 2062 | 40 | Fibroblast growth factor 3                       |
| 1060 | 2062 | 40 | FGF4                                             |
| 1060 | 2062 | 40 | FGF6                                             |
| 1060 | 2062 | 40 | FGF7                                             |
| 1060 | 2062 | 40 | Fibroblast growth receptor 1                     |
| 1060 | 2062 | 40 | Fibroblast growth receptor 2                     |
| 1060 | 2062 | 40 | Fibroblast growth receptor 3                     |
| 1060 | 2062 | 40 | Fibroblast growth receptor 4                     |
| 1060 | 2062 | 40 | FLT1                                             |
| 1060 | 2062 | 40 | Fms-like tyrosine kinase 3 (FLT3)                |
| 1060 | 2062 | 40 | FLT4                                             |
| 1060 | 2062 | 40 | FOXL2                                            |
| 1060 | 2062 | 40 | GATA1                                            |
| 1060 | 2062 | 40 | GATA2                                            |
| 1060 | 2062 | 40 | GATA3                                            |
| 1060 | 2062 | 40 | GNA11                                            |
| 1060 | 2062 | 40 | GNA13                                            |
| 1060 | 2062 | 40 | GNAQ                                             |
| 1060 | 2062 | 40 | GNAS                                             |
| 1060 | 2062 | 40 | GPR124                                           |
| 1060 | 2062 | 40 | GRIN2A                                           |
| 1060 | 2062 | 40 | GSK3B                                            |
| 1060 | 2062 | 40 | Hepatocyte growth factor                         |
| 1060 | 2062 | 40 | HLA-A                                            |
| 1060 | 2062 | 40 | HRAS                                             |
| 1060 | 2062 | 40 | IDH1                                             |
| 1060 | 2062 | 40 | IDH2                                             |
| 1060 | 2062 | 40 | Insulin-like growth factor 1                     |
| 1060 | 2062 | 40 | Insulin growth factor 1 receptor                 |
| 1060 | 2062 | 40 | Insulin-like growth factor 2, also somatomedin A |
| 1060 | 2062 | 40 | IKBKE                                            |
| 1060 | 2062 | 40 | IKZF1                                            |
| 1060 | 2062 | 40 | IL7R                                             |
| 1060 | 2062 | 40 | INHBA                                            |
| 1060 | 2062 | 40 | IRF4                                             |
| 1060 | 2062 | 40 | IRS2                                             |
| 1060 | 2062 | 40 | JAK1                                             |
| 1060 | 2062 | 40 | JAK2                                             |
| 1060 | 2062 | 40 | JAK3                                             |
| 1060 | 2062 | 40 | JUN                                              |

|      |      |    |                                                |
|------|------|----|------------------------------------------------|
| 1060 | 2062 | 40 | KDM5A                                          |
| 1060 | 2062 | 40 | KDM5C                                          |
| 1060 | 2062 | 40 | KDM6A                                          |
| 1060 | 2062 | 40 | KDR                                            |
| 1060 | 2062 | 40 | KEAP1                                          |
| 1060 | 2062 | 40 | KIT                                            |
| 1060 | 2062 | 40 | KLHL6                                          |
| 1060 | 2062 | 40 | KRAS                                           |
| 1060 | 2062 | 40 | LMO1                                           |
| 1060 | 2062 | 40 | LRP1B                                          |
| 1060 | 2062 | 40 | MAP2K1                                         |
| 1060 | 2062 | 40 | MAP2K2                                         |
| 1060 | 2062 | 40 | MAP2K4                                         |
| 1060 | 2062 | 40 | MAP3K13                                        |
| 1060 | 2062 | 40 | MDM2                                           |
| 1060 | 2062 | 40 | MDM4                                           |
| 1060 | 2062 | 40 | MED12                                          |
| 1060 | 2062 | 40 | MEF2B                                          |
| 1060 | 2062 | 40 | MEN1                                           |
| 1060 | 2062 | 40 | MET                                            |
| 1060 | 2062 | 40 | Microphthalmia associated transcription factor |
| 1060 | 2062 | 40 | MLH1                                           |
| 1060 | 2062 | 40 | MLL                                            |
| 1060 | 2062 | 40 | MLL2                                           |
| 1060 | 2062 | 40 | MPL                                            |
| 1060 | 2062 | 40 | MRE11A                                         |
| 1060 | 2062 | 40 | MSH2                                           |
| 1060 | 2062 | 40 | MSH6                                           |
| 1060 | 2062 | 40 | MTOR                                           |
| 1060 | 2062 | 40 | MUTYH                                          |
| 1060 | 2062 | 40 | MYCL1                                          |
| 1060 | 2062 | 40 | MYCN                                           |
| 1060 | 2062 | 40 | MYD88                                          |
| 1060 | 2062 | 40 | MYST3                                          |
| 1060 | 2062 | 40 | NBN                                            |
| 1060 | 2062 | 40 | NCOR1                                          |
| 1060 | 2062 | 40 | NF1                                            |
| 1060 | 2062 | 40 | NF2                                            |
| 1060 | 2062 | 40 | NFE2L2                                         |
| 1060 | 2062 | 40 | NFKBIA                                         |

|      |      |    |                                |
|------|------|----|--------------------------------|
| 1060 | 2062 | 40 | NKX2-1                         |
| 1060 | 2062 | 40 | NOTCH1                         |
| 1060 | 2062 | 40 | NOTCH2                         |
| 1060 | 2062 | 40 | NOTCH3                         |
| 1060 | 2062 | 40 | NOTCH4                         |
| 1060 | 2062 | 40 | Nucleophosmin (NPM1)           |
| 1060 | 2062 | 40 | NRAS                           |
| 1060 | 2062 | 40 | NSD1                           |
| 1060 | 2062 | 40 | NTRK1                          |
| 1060 | 2062 | 40 | NTRK2                          |
| 1060 | 2062 | 40 | NTRK3                          |
| 1060 | 2062 | 40 | NUP93                          |
| 1060 | 2062 | 40 | PAK3                           |
| 1060 | 2062 | 40 | PAK7                           |
| 1060 | 2062 | 40 | PALB2                          |
| 1060 | 2062 | 40 | PARP1                          |
| 1060 | 2062 | 40 | PARP2                          |
| 1060 | 2062 | 40 | PARP3                          |
| 1060 | 2062 | 40 | PARP4                          |
| 1060 | 2062 | 40 | PAX5                           |
| 1060 | 2062 | 40 | PDGFRA                         |
| 1060 | 2062 | 40 | PDGFRB                         |
| 1060 | 2062 | 40 | PDK1                           |
| 1060 | 2062 | 40 | PIK3C2G                        |
| 1060 | 2062 | 40 | PIK3C3                         |
| 1060 | 2062 | 40 | PIK3CG                         |
| 1060 | 2062 | 40 | PIK3R1                         |
| 1060 | 2062 | 40 | PIK3R2                         |
| 1060 | 2062 | 40 | PMS2                           |
| 1060 | 2062 | 40 | PNRC1                          |
| 1060 | 2062 | 40 | PPP2R1A                        |
| 1060 | 2062 | 40 | PRDM1                          |
| 1060 | 2062 | 40 | PRKAR1A                        |
| 1060 | 2062 | 40 | PRKDC                          |
| 1060 | 2062 | 40 | PTCH1                          |
| 1060 | 2062 | 40 | Phosphatase and Tensin homolog |
| 1060 | 2062 | 40 | PTPN11                         |
| 1060 | 2062 | 40 | RAD50                          |
| 1060 | 2062 | 40 | RAD51                          |
| 1060 | 2062 | 40 | RAD51B                         |

|      |      |    |             |
|------|------|----|-------------|
| 1060 | 2062 | 40 | RAD51C      |
| 1060 | 2062 | 40 | RAD51D      |
| 1060 | 2062 | 40 | RAD52       |
| 1060 | 2062 | 40 | RAD54L      |
| 1060 | 2062 | 40 | RAF1        |
| 1060 | 2062 | 40 | RARA        |
| 1060 | 2062 | 40 | 13q14(RB1)V |
| 1060 | 2062 | 40 | REL         |
| 1060 | 2062 | 40 | RET         |
| 1060 | 2062 | 40 | RICTOR      |
| 1060 | 2062 | 40 | RNF43       |
| 1060 | 2062 | 40 | ROS1        |
| 1060 | 2062 | 40 | RPA1        |
| 1060 | 2062 | 40 | RPTOR       |
| 1060 | 2062 | 40 | RUNX1       |
| 1060 | 2062 | 40 | RUNX1T1     |
| 1060 | 2062 | 40 | SETD2       |
| 1060 | 2062 | 40 | SF3B1       |
| 1060 | 2062 | 40 | SH2B3       |
| 1060 | 2062 | 40 | SMAD2       |
| 1060 | 2062 | 40 | SMAD4       |
| 1060 | 2062 | 40 | SMARCA4     |
| 1060 | 2062 | 40 | SMARCB1     |
| 1060 | 2062 | 40 | SMARCD1     |
| 1060 | 2062 | 40 | SMO         |
| 1060 | 2062 | 40 | SOCS1       |
| 1060 | 2062 | 40 | SOX10       |
| 1060 | 2062 | 40 | SOX2        |
| 1060 | 2062 | 40 | SPEN        |
| 1060 | 2062 | 40 | SPOP        |
| 1060 | 2062 | 40 | SRC         |
| 1060 | 2062 | 40 | STAG2       |
| 1060 | 2062 | 40 | STAT4       |
| 1060 | 2062 | 40 | STK11       |
| 1060 | 2062 | 40 | SUFU        |
| 1060 | 2062 | 40 | SYK         |
| 1060 | 2062 | 40 | TBX3        |
| 1060 | 2062 | 40 | TET2        |
| 1060 | 2062 | 40 | TGFBR2      |
| 1060 | 2062 | 40 | TIPARP      |

|      |      |    |                                   |
|------|------|----|-----------------------------------|
| 1060 | 2062 | 40 | TMPRSS2                           |
| 1060 | 2062 | 40 | TNFAIP3                           |
| 1060 | 2062 | 40 | TNFRSF14                          |
| 1060 | 2062 | 40 | TOP1                              |
| 1060 | 2062 | 40 | TRRAP                             |
| 1060 | 2062 | 40 | Tuberous sclerosis complex 1 gene |
| 1060 | 2062 | 40 | Tuberous sclerosis complex 2 gene |
| 1060 | 2062 | 40 | TSHR                              |
| 1060 | 2062 | 40 | Von Hippel-Lindau                 |
| 1060 | 2062 | 40 | WISP3                             |
| 1060 | 2062 | 40 | WT1                               |
| 1060 | 2062 | 40 | XPO1                              |
| 1060 | 2062 | 40 | XRCC3                             |
| 1060 | 2062 | 40 | ZNF217                            |
| 1060 | 2062 | 40 | ZNF703                            |
| 1061 | 2063 | 90 | ABL1                              |
| 1061 | 2063 | 90 | AKT1                              |
| 1061 | 2063 | 90 | AKT2                              |
| 1061 | 2063 | 90 | AKT3                              |
| 1061 | 2063 | 90 | ALK                               |
| 1061 | 2063 | 90 | ALOX12B                           |
| 1061 | 2063 | 90 | APC                               |
| 1061 | 2063 | 90 | APCDD1                            |
| 1061 | 2063 | 90 | AR                                |
| 1061 | 2063 | 90 | ARAF                              |
| 1061 | 2063 | 90 | ARFRP1                            |
| 1061 | 2063 | 90 | ARID1A                            |
| 1061 | 2063 | 90 | ARID2                             |
| 1061 | 2063 | 90 | ASXL1                             |
| 1061 | 2063 | 90 | ATM                               |
| 1061 | 2063 | 90 | ATR                               |
| 1061 | 2063 | 90 | ATRX                              |
| 1061 | 2063 | 90 | AURKA                             |
| 1061 | 2063 | 90 | AURKB                             |
| 1061 | 2063 | 90 | AXL                               |
| 1061 | 2063 | 90 | BACH1                             |
| 1061 | 2063 | 90 | BAP1                              |
| 1061 | 2063 | 90 | BARD1                             |
| 1061 | 2063 | 90 | BCL-2                             |

|      |      |    |                                       |
|------|------|----|---------------------------------------|
| 1061 | 2063 | 90 | BCL2L2                                |
| 1061 | 2063 | 90 | BCL6                                  |
| 1061 | 2063 | 90 | BCOR                                  |
| 1061 | 2063 | 90 | BCORL1                                |
| 1061 | 2063 | 90 | BCR                                   |
| 1061 | 2063 | 90 | BLM                                   |
| 1061 | 2063 | 90 | BRAF                                  |
| 1061 | 2063 | 90 | BRCA1                                 |
| 1061 | 2063 | 90 | BRCA2                                 |
| 1061 | 2063 | 90 | BRIP1                                 |
| 1061 | 2063 | 90 | BTG1                                  |
| 1061 | 2063 | 90 | BTK                                   |
| 1061 | 2063 | 90 | C17orf39                              |
| 1061 | 2063 | 90 | CARD11                                |
| 1061 | 2063 | 90 | CASP8                                 |
| 1061 | 2063 | 90 | CBFB                                  |
| 1061 | 2063 | 90 | CBL                                   |
| 1061 | 2063 | 90 | CCND1                                 |
| 1061 | 2063 | 90 | CCND2                                 |
| 1061 | 2063 | 90 | CCND3                                 |
| 1061 | 2063 | 90 | CCNE1                                 |
| 1061 | 2063 | 90 | CD79A                                 |
| 1061 | 2063 | 90 | CD79B                                 |
| 1061 | 2063 | 90 | CDC73                                 |
| 1061 | 2063 | 90 | CDH1                                  |
| 1061 | 2063 | 90 | CDK12                                 |
| 1061 | 2063 | 90 | Cyclin dependent kinase-4             |
| 1061 | 2063 | 90 | CDK6                                  |
| 1061 | 2063 | 90 | CDK8                                  |
| 1061 | 2063 | 90 | CDKN1B                                |
| 1061 | 2063 | 90 | CDKN2A                                |
| 1061 | 2063 | 90 | CDKN2B                                |
| 1061 | 2063 | 90 | CDKN2C                                |
| 1061 | 2063 | 90 | CCAT/enhancer binding protein (CEBPA) |
| 1061 | 2063 | 90 | CHEK1                                 |
| 1061 | 2063 | 90 | CHEK2                                 |
| 1061 | 2063 | 90 | CHUK                                  |
| 1061 | 2063 | 90 | CIC                                   |
| 1061 | 2063 | 90 | CRBN                                  |
| 1061 | 2063 | 90 | CREBBP                                |



|      |      |    |                                  |
|------|------|----|----------------------------------|
| 1061 | 2063 | 90 | CRKL                             |
| 1061 | 2063 | 90 | CRLF2                            |
| 1061 | 2063 | 90 | CSF1R                            |
| 1061 | 2063 | 90 | CTCF                             |
| 1061 | 2063 | 90 | CTNNA1                           |
| 1061 | 2063 | 90 | CTNNB1                           |
| 1061 | 2063 | 90 | CUL4A                            |
| 1061 | 2063 | 90 | CUL4B                            |
| 1061 | 2063 | 90 | CYP17A1                          |
| 1061 | 2063 | 90 | DAXX                             |
| 1061 | 2063 | 90 | DDR2                             |
| 1061 | 2063 | 90 | DIS3                             |
| 1061 | 2063 | 90 | DNMT3A                           |
| 1061 | 2063 | 90 | DOT1L                            |
| 1061 | 2063 | 90 | Epidermal Growth Factor Receptor |
| 1061 | 2063 | 90 | EMSY                             |
| 1061 | 2063 | 90 | EP300                            |
| 1061 | 2063 | 90 | EPHA5                            |
| 1061 | 2063 | 90 | EPHB1                            |
| 1061 | 2063 | 90 | ERBB2                            |
| 1061 | 2063 | 90 | ERBB3                            |
| 1061 | 2063 | 90 | ERBB4                            |
| 1061 | 2063 | 90 | ERG                              |
| 1061 | 2063 | 90 | Estrogen receptor 1              |
| 1061 | 2063 | 90 | ETV1                             |
| 1061 | 2063 | 90 | ETV4                             |
| 1061 | 2063 | 90 | ETV5                             |
| 1061 | 2063 | 90 | ETV6                             |
| 1061 | 2063 | 90 | EWSR1                            |
| 1061 | 2063 | 90 | EZH2                             |
| 1061 | 2063 | 90 | FAM123B(WTX)                     |
| 1061 | 2063 | 90 | FAM46C                           |
| 1061 | 2063 | 90 | FANCA                            |
| 1061 | 2063 | 90 | FANCC                            |
| 1061 | 2063 | 90 | FANCD2                           |
| 1061 | 2063 | 90 | FANCE                            |
| 1061 | 2063 | 90 | FANCF                            |
| 1061 | 2063 | 90 | FANCG                            |
| 1061 | 2063 | 90 | FANCI                            |
| 1061 | 2063 | 90 | FANCL                            |

|      |      |    |                                                  |
|------|------|----|--------------------------------------------------|
| 1061 | 2063 | 90 | FANCM                                            |
| 1061 | 2063 | 90 | FAT3                                             |
| 1061 | 2063 | 90 | FBXW7                                            |
| 1061 | 2063 | 90 | FGF10                                            |
| 1061 | 2063 | 90 | FGF12                                            |
| 1061 | 2063 | 90 | FGF14                                            |
| 1061 | 2063 | 90 | Fibroblast growth factor 19                      |
| 1061 | 2063 | 90 | Fibroblast growth factor 23                      |
| 1061 | 2063 | 90 | Fibroblast growth factor 3                       |
| 1061 | 2063 | 90 | FGF4                                             |
| 1061 | 2063 | 90 | FGF6                                             |
| 1061 | 2063 | 90 | FGF7                                             |
| 1061 | 2063 | 90 | Fibroblast growth receptor 2                     |
| 1061 | 2063 | 90 | Fibroblast growth receptor 3                     |
| 1061 | 2063 | 90 | Fibroblast growth receptor 4                     |
| 1061 | 2063 | 90 | FLT1                                             |
| 1061 | 2063 | 90 | Fms-like tyrosine kinase 3 (FLT3)                |
| 1061 | 2063 | 90 | FLT4                                             |
| 1061 | 2063 | 90 | FOXL2                                            |
| 1061 | 2063 | 90 | GATA1                                            |
| 1061 | 2063 | 90 | GATA2                                            |
| 1061 | 2063 | 90 | GATA3                                            |
| 1061 | 2063 | 90 | GNA11                                            |
| 1061 | 2063 | 90 | GNA13                                            |
| 1061 | 2063 | 90 | GNAQ                                             |
| 1061 | 2063 | 90 | GNAS                                             |
| 1061 | 2063 | 90 | GPR124                                           |
| 1061 | 2063 | 90 | GRIN2A                                           |
| 1061 | 2063 | 90 | GSK3B                                            |
| 1061 | 2063 | 90 | Hepatocyte growth factor                         |
| 1061 | 2063 | 90 | HLA-A                                            |
| 1061 | 2063 | 90 | HRAS                                             |
| 1061 | 2063 | 90 | IDH1                                             |
| 1061 | 2063 | 90 | IDH2                                             |
| 1061 | 2063 | 90 | Insulin-like growth factor 1                     |
| 1061 | 2063 | 90 | Insulin growth factor 1 receptor                 |
| 1061 | 2063 | 90 | Insulin-like growth factor 2, also somatomedin A |
| 1061 | 2063 | 90 | IKBKE                                            |
| 1061 | 2063 | 90 | IKZF1                                            |
| 1061 | 2063 | 90 | IL7R                                             |

|      |      |    |                                                |
|------|------|----|------------------------------------------------|
| 1061 | 2063 | 90 | INHBA                                          |
| 1061 | 2063 | 90 | IRF4                                           |
| 1061 | 2063 | 90 | IRS2                                           |
| 1061 | 2063 | 90 | JAK1                                           |
| 1061 | 2063 | 90 | JAK2                                           |
| 1061 | 2063 | 90 | JAK3                                           |
| 1061 | 2063 | 90 | JUN                                            |
| 1061 | 2063 | 90 | KDM5A                                          |
| 1061 | 2063 | 90 | KDM5C                                          |
| 1061 | 2063 | 90 | KDM6A                                          |
| 1061 | 2063 | 90 | KDR                                            |
| 1061 | 2063 | 90 | KEAP1                                          |
| 1061 | 2063 | 90 | KIT                                            |
| 1061 | 2063 | 90 | KLHL6                                          |
| 1061 | 2063 | 90 | KRAS                                           |
| 1061 | 2063 | 90 | LMO1                                           |
| 1061 | 2063 | 90 | LRP1B                                          |
| 1061 | 2063 | 90 | MAP2K1                                         |
| 1061 | 2063 | 90 | MAP2K2                                         |
| 1061 | 2063 | 90 | MAP3K1                                         |
| 1061 | 2063 | 90 | MAP3K13                                        |
| 1061 | 2063 | 90 | MCL1                                           |
| 1061 | 2063 | 90 | MDM2                                           |
| 1061 | 2063 | 90 | MDM4                                           |
| 1061 | 2063 | 90 | MED12                                          |
| 1061 | 2063 | 90 | MEF2B                                          |
| 1061 | 2063 | 90 | MEN1                                           |
| 1061 | 2063 | 90 | MET                                            |
| 1061 | 2063 | 90 | Microphthalmia associated transcription factor |
| 1061 | 2063 | 90 | MLH1                                           |
| 1061 | 2063 | 90 | MLL                                            |
| 1061 | 2063 | 90 | MLL2                                           |
| 1061 | 2063 | 90 | MPL                                            |
| 1061 | 2063 | 90 | MRE11A                                         |
| 1061 | 2063 | 90 | MSH2                                           |
| 1061 | 2063 | 90 | MSH6                                           |
| 1061 | 2063 | 90 | MTOR                                           |
| 1061 | 2063 | 90 | MUTYH                                          |
| 1061 | 2063 | 90 | MYC                                            |
| 1061 | 2063 | 90 | MYCL1                                          |

|      |      |    |                      |
|------|------|----|----------------------|
| 1061 | 2063 | 90 | MYCN                 |
| 1061 | 2063 | 90 | MYD88                |
| 1061 | 2063 | 90 | MYST3                |
| 1061 | 2063 | 90 | NBN                  |
| 1061 | 2063 | 90 | NCOR1                |
| 1061 | 2063 | 90 | NF1                  |
| 1061 | 2063 | 90 | NF2                  |
| 1061 | 2063 | 90 | NFE2L2               |
| 1061 | 2063 | 90 | NFKBIA               |
| 1061 | 2063 | 90 | NKX2-1               |
| 1061 | 2063 | 90 | NOTCH1               |
| 1061 | 2063 | 90 | NOTCH2               |
| 1061 | 2063 | 90 | NOTCH3               |
| 1061 | 2063 | 90 | NOTCH4               |
| 1061 | 2063 | 90 | Nucleophosmin (NPM1) |
| 1061 | 2063 | 90 | NRAS                 |
| 1061 | 2063 | 90 | NSD1                 |
| 1061 | 2063 | 90 | NTRK1                |
| 1061 | 2063 | 90 | NTRK2                |
| 1061 | 2063 | 90 | NTRK3                |
| 1061 | 2063 | 90 | NUP93                |
| 1061 | 2063 | 90 | PAK3                 |
| 1061 | 2063 | 90 | PAK7                 |
| 1061 | 2063 | 90 | PALB2                |
| 1061 | 2063 | 90 | PARP1                |
| 1061 | 2063 | 90 | PARP2                |
| 1061 | 2063 | 90 | PARP3                |
| 1061 | 2063 | 90 | PARP4                |
| 1061 | 2063 | 90 | PAX5                 |
| 1061 | 2063 | 90 | PBRM1                |
| 1061 | 2063 | 90 | PDGFRA               |
| 1061 | 2063 | 90 | PDGFRB               |
| 1061 | 2063 | 90 | PDK1                 |
| 1061 | 2063 | 90 | PIK3C2G              |
| 1061 | 2063 | 90 | PIK3C3               |
| 1061 | 2063 | 90 | PIK3CG               |
| 1061 | 2063 | 90 | PIK3R1               |
| 1061 | 2063 | 90 | PIK3R2               |
| 1061 | 2063 | 90 | PMS2                 |
| 1061 | 2063 | 90 | PNRC1                |

|      |      |    |                                |
|------|------|----|--------------------------------|
| 1061 | 2063 | 90 | PPP2R1A                        |
| 1061 | 2063 | 90 | PRDM1                          |
| 1061 | 2063 | 90 | PRKAR1A                        |
| 1061 | 2063 | 90 | PRKDC                          |
| 1061 | 2063 | 90 | PRSS8                          |
| 1061 | 2063 | 90 | PTCH1                          |
| 1061 | 2063 | 90 | Phosphatase and Tensin homolog |
| 1061 | 2063 | 90 | RAD50                          |
| 1061 | 2063 | 90 | RAD51                          |
| 1061 | 2063 | 90 | RAD51B                         |
| 1061 | 2063 | 90 | RAD51C                         |
| 1061 | 2063 | 90 | RAD51D                         |
| 1061 | 2063 | 90 | RAD52                          |
| 1061 | 2063 | 90 | RAD54L                         |
| 1061 | 2063 | 90 | RAF1                           |
| 1061 | 2063 | 90 | RARA                           |
| 1061 | 2063 | 90 | 13q14(RB1)V                    |
| 1061 | 2063 | 90 | REL                            |
| 1061 | 2063 | 90 | RET                            |
| 1061 | 2063 | 90 | RICTOR                         |
| 1061 | 2063 | 90 | RNF43                          |
| 1061 | 2063 | 90 | ROS1                           |
| 1061 | 2063 | 90 | RPA1                           |
| 1061 | 2063 | 90 | RPTOR                          |
| 1061 | 2063 | 90 | RUNX1                          |
| 1061 | 2063 | 90 | RUNX1T1                        |
| 1061 | 2063 | 90 | SETD2                          |
| 1061 | 2063 | 90 | SF3B1                          |
| 1061 | 2063 | 90 | SH2B3                          |
| 1061 | 2063 | 90 | SMAD2                          |
| 1061 | 2063 | 90 | SMAD4                          |
| 1061 | 2063 | 90 | SMARCA4                        |
| 1061 | 2063 | 90 | SMARCB1                        |
| 1061 | 2063 | 90 | SMARCD1                        |
| 1061 | 2063 | 90 | SMO                            |
| 1061 | 2063 | 90 | SOCS1                          |
| 1061 | 2063 | 90 | SOX10                          |
| 1061 | 2063 | 90 | SOX2                           |
| 1061 | 2063 | 90 | SPEN                           |
| 1061 | 2063 | 90 | SPOP                           |

|      |      |    |                                   |
|------|------|----|-----------------------------------|
| 1061 | 2063 | 90 | SRC                               |
| 1061 | 2063 | 90 | STAG2                             |
| 1061 | 2063 | 90 | STAT4                             |
| 1061 | 2063 | 90 | STK11                             |
| 1061 | 2063 | 90 | SUFU                              |
| 1061 | 2063 | 90 | SYK                               |
| 1061 | 2063 | 90 | TBX3                              |
| 1061 | 2063 | 90 | TET2                              |
| 1061 | 2063 | 90 | TGFBR2                            |
| 1061 | 2063 | 90 | TIPARP                            |
| 1061 | 2063 | 90 | TMPRSS2                           |
| 1061 | 2063 | 90 | TNFAIP3                           |
| 1061 | 2063 | 90 | TNFRSF14                          |
| 1061 | 2063 | 90 | TOP1                              |
| 1061 | 2063 | 90 | TRRAP                             |
| 1061 | 2063 | 90 | Tuberous sclerosis complex 1 gene |
| 1061 | 2063 | 90 | Tuberous sclerosis complex 2 gene |
| 1061 | 2063 | 90 | TSHR                              |
| 1061 | 2063 | 90 | Von Hippel-Lindau                 |
| 1061 | 2063 | 90 | WISP3                             |
| 1061 | 2063 | 90 | WT1                               |
| 1061 | 2063 | 90 | XPO1                              |
| 1061 | 2063 | 90 | XRCC3                             |
| 1061 | 2063 | 90 | ZNF217                            |
| 1061 |      | 90 | PTPN11                            |
| 1062 | 2064 | 30 | ABL1                              |
| 1062 | 2064 | 30 | AKT1                              |
| 1062 | 2064 | 30 | AKT2                              |
| 1062 | 2064 | 30 | AKT3                              |
| 1062 | 2064 | 30 | ALK                               |
| 1062 | 2064 | 30 | ALOX12B                           |
| 1062 | 2064 | 30 | APC                               |
| 1062 | 2064 | 30 | APCDD1                            |
| 1062 | 2064 | 30 | AR                                |
| 1062 | 2064 | 30 | ARAF                              |
| 1062 | 2064 | 30 | ARFRP1                            |
| 1062 | 2064 | 30 | ARID1A                            |
| 1062 | 2064 | 30 | ARID2                             |
| 1062 | 2064 | 30 | ASXL1                             |

|      |      |    |                           |
|------|------|----|---------------------------|
| 1062 | 2064 | 30 | ATM                       |
| 1062 | 2064 | 30 | ATR                       |
| 1062 | 2064 | 30 | ATRX                      |
| 1062 | 2064 | 30 | AURKA                     |
| 1062 | 2064 | 30 | AURKB                     |
| 1062 | 2064 | 30 | AXL                       |
| 1062 | 2064 | 30 | BACH1                     |
| 1062 | 2064 | 30 | BAP1                      |
| 1062 | 2064 | 30 | BARD1                     |
| 1062 | 2064 | 30 | BCL-2                     |
| 1062 | 2064 | 30 | BCL2L2                    |
| 1062 | 2064 | 30 | BCL6                      |
| 1062 | 2064 | 30 | BCOR                      |
| 1062 | 2064 | 30 | BCORL1                    |
| 1062 | 2064 | 30 | BCR                       |
| 1062 | 2064 | 30 | BLM                       |
| 1062 | 2064 | 30 | BRAF                      |
| 1062 | 2064 | 30 | BRCA1                     |
| 1062 | 2064 | 30 | BRCA2                     |
| 1062 | 2064 | 30 | BRIP1                     |
| 1062 | 2064 | 30 | BTG1                      |
| 1062 | 2064 | 30 | BTK                       |
| 1062 | 2064 | 30 | C17orf39                  |
| 1062 | 2064 | 30 | CARD11                    |
| 1062 | 2064 | 30 | CASP8                     |
| 1062 | 2064 | 30 | CBFB                      |
| 1062 | 2064 | 30 | CBL                       |
| 1062 | 2064 | 30 | CCND1                     |
| 1062 | 2064 | 30 | CCND2                     |
| 1062 | 2064 | 30 | CCND3                     |
| 1062 | 2064 | 30 | CCNE1                     |
| 1062 | 2064 | 30 | CD79A                     |
| 1062 | 2064 | 30 | CD79B                     |
| 1062 | 2064 | 30 | CDC73                     |
| 1062 | 2064 | 30 | CDH1                      |
| 1062 | 2064 | 30 | CDK12                     |
| 1062 | 2064 | 30 | Cyclin dependent kinase-4 |
| 1062 | 2064 | 30 | CDK6                      |
| 1062 | 2064 | 30 | CDK8                      |
| 1062 | 2064 | 30 | CDKN1B                    |

|      |      |    |                                       |
|------|------|----|---------------------------------------|
| 1062 | 2064 | 30 | CDKN2A                                |
| 1062 | 2064 | 30 | CDKN2B                                |
| 1062 | 2064 | 30 | CDKN2C                                |
| 1062 | 2064 | 30 | CCAT/enhancer binding protein (CEBPA) |
| 1062 | 2064 | 30 | CHEK1                                 |
| 1062 | 2064 | 30 | CHEK2                                 |
| 1062 | 2064 | 30 | CHUK                                  |
| 1062 | 2064 | 30 | CIC                                   |
| 1062 | 2064 | 30 | CRBN                                  |
| 1062 | 2064 | 30 | CREBBP                                |
| 1062 | 2064 | 30 | CRKL                                  |
| 1062 | 2064 | 30 | CRLF2                                 |
| 1062 | 2064 | 30 | CSF1R                                 |
| 1062 | 2064 | 30 | CTCF                                  |
| 1062 | 2064 | 30 | CTNNA1                                |
| 1062 | 2064 | 30 | CTNNB1                                |
| 1062 | 2064 | 30 | CUL4A                                 |
| 1062 | 2064 | 30 | CUL4B                                 |
| 1062 | 2064 | 30 | CYP17A1                               |
| 1062 | 2064 | 30 | DAXX                                  |
| 1062 | 2064 | 30 | DDR2                                  |
| 1062 | 2064 | 30 | DIS3                                  |
| 1062 | 2064 | 30 | DNMT3A                                |
| 1062 | 2064 | 30 | DOT1L                                 |
| 1062 | 2064 | 30 | Epidermal Growth Factor Receptor      |
| 1062 | 2064 | 30 | EMSY                                  |
| 1062 | 2064 | 30 | EP300                                 |
| 1062 | 2064 | 30 | EPHA3                                 |
| 1062 | 2064 | 30 | EPHA5                                 |
| 1062 | 2064 | 30 | EPHB1                                 |
| 1062 | 2064 | 30 | ERBB2                                 |
| 1062 | 2064 | 30 | ERBB3                                 |
| 1062 | 2064 | 30 | ERBB4                                 |
| 1062 | 2064 | 30 | ERG                                   |
| 1062 | 2064 | 30 | ETV1                                  |
| 1062 | 2064 | 30 | ETV4                                  |
| 1062 | 2064 | 30 | ETV5                                  |
| 1062 | 2064 | 30 | ETV6                                  |
| 1062 | 2064 | 30 | EWSR1                                 |



|      |      |    |                                   |
|------|------|----|-----------------------------------|
| 1062 | 2064 | 30 | EZH2                              |
| 1062 | 2064 | 30 | FAM123B(WTX)                      |
| 1062 | 2064 | 30 | FAM46C                            |
| 1062 | 2064 | 30 | FANCA                             |
| 1062 | 2064 | 30 | FANCC                             |
| 1062 | 2064 | 30 | FANCD2                            |
| 1062 | 2064 | 30 | FANCE                             |
| 1062 | 2064 | 30 | FANCF                             |
| 1062 | 2064 | 30 | FANCG                             |
| 1062 | 2064 | 30 | FANCI                             |
| 1062 | 2064 | 30 | FANCL                             |
| 1062 | 2064 | 30 | FANCM                             |
| 1062 | 2064 | 30 | FAT3                              |
| 1062 | 2064 | 30 | FBXW7                             |
| 1062 | 2064 | 30 | FGF10                             |
| 1062 | 2064 | 30 | FGF12                             |
| 1062 | 2064 | 30 | FGF14                             |
| 1062 | 2064 | 30 | Fibroblast growth factor 19       |
| 1062 | 2064 | 30 | Fibroblast growth factor 23       |
| 1062 | 2064 | 30 | Fibroblast growth factor 3        |
| 1062 | 2064 | 30 | FGF4                              |
| 1062 | 2064 | 30 | FGF6                              |
| 1062 | 2064 | 30 | FGF7                              |
| 1062 | 2064 | 30 | Fibroblast growth receptor 2      |
| 1062 | 2064 | 30 | Fibroblast growth receptor 3      |
| 1062 | 2064 | 30 | Fibroblast growth receptor 4      |
| 1062 | 2064 | 30 | FLT1                              |
| 1062 | 2064 | 30 | Fms-like tyrosine kinase 3 (FLT3) |
| 1062 | 2064 | 30 | FLT4                              |
| 1062 | 2064 | 30 | FOXL2                             |
| 1062 | 2064 | 30 | GATA1                             |
| 1062 | 2064 | 30 | GATA2                             |
| 1062 | 2064 | 30 | GATA3                             |
| 1062 | 2064 | 30 | GNA11                             |
| 1062 | 2064 | 30 | GNA13                             |
| 1062 | 2064 | 30 | GNAQ                              |
| 1062 | 2064 | 30 | GNAS                              |
| 1062 | 2064 | 30 | GPR124                            |
| 1062 | 2064 | 30 | GRIN2A                            |
| 1062 | 2064 | 30 | GSK3B                             |

|      |      |    |                                                  |
|------|------|----|--------------------------------------------------|
| 1062 | 2064 | 30 | Hepatocyte growth factor                         |
| 1062 | 2064 | 30 | HLA-A                                            |
| 1062 | 2064 | 30 | HRAS                                             |
| 1062 | 2064 | 30 | IDH1                                             |
| 1062 | 2064 | 30 | IDH2                                             |
| 1062 | 2064 | 30 | Insulin-like growth factor 1                     |
| 1062 | 2064 | 30 | Insulin growth factor 1 receptor                 |
| 1062 | 2064 | 30 | Insulin-like growth factor 2, also somatomedin A |
| 1062 | 2064 | 30 | IKBKE                                            |
| 1062 | 2064 | 30 | IKZF1                                            |
| 1062 | 2064 | 30 | IL7R                                             |
| 1062 | 2064 | 30 | INHBA                                            |
| 1062 | 2064 | 30 | IRF4                                             |
| 1062 | 2064 | 30 | IRS2                                             |
| 1062 | 2064 | 30 | JAK1                                             |
| 1062 | 2064 | 30 | JAK2                                             |
| 1062 | 2064 | 30 | JAK3                                             |
| 1062 | 2064 | 30 | JUN                                              |
| 1062 | 2064 | 30 | KDM5A                                            |
| 1062 | 2064 | 30 | KDM5C                                            |
| 1062 | 2064 | 30 | KDM6A                                            |
| 1062 | 2064 | 30 | KDR                                              |
| 1062 | 2064 | 30 | KEAP1                                            |
| 1062 | 2064 | 30 | KIT                                              |
| 1062 | 2064 | 30 | KLHL6                                            |
| 1062 | 2064 | 30 | KRAS                                             |
| 1062 | 2064 | 30 | LMO1                                             |
| 1062 | 2064 | 30 | LRP1B                                            |
| 1062 | 2064 | 30 | MAP2K1                                           |
| 1062 | 2064 | 30 | MAP2K2                                           |
| 1062 | 2064 | 30 | MAP2K4                                           |
| 1062 | 2064 | 30 | MAP3K1                                           |
| 1062 | 2064 | 30 | MAP3K13                                          |
| 1062 | 2064 | 30 | MCL1                                             |
| 1062 | 2064 | 30 | MDM2                                             |
| 1062 | 2064 | 30 | MDM4                                             |
| 1062 | 2064 | 30 | MED12                                            |
| 1062 | 2064 | 30 | MEF2B                                            |
| 1062 | 2064 | 30 | MEN1                                             |
| 1062 | 2064 | 30 | MET                                              |

|      |      |    |                                                |
|------|------|----|------------------------------------------------|
| 1062 | 2064 | 30 | Microphthalmia associated transcription factor |
| 1062 | 2064 | 30 | MLH1                                           |
| 1062 | 2064 | 30 | MLL                                            |
| 1062 | 2064 | 30 | MLL2                                           |
| 1062 | 2064 | 30 | MPL                                            |
| 1062 | 2064 | 30 | MRE11A                                         |
| 1062 | 2064 | 30 | MSH2                                           |
| 1062 | 2064 | 30 | MSH6                                           |
| 1062 | 2064 | 30 | MTOR                                           |
| 1062 | 2064 | 30 | MUTYH                                          |
| 1062 | 2064 | 30 | MYC                                            |
| 1062 | 2064 | 30 | MYCL1                                          |
| 1062 | 2064 | 30 | MYCN                                           |
| 1062 | 2064 | 30 | MYD88                                          |
| 1062 | 2064 | 30 | MYST3                                          |
| 1062 | 2064 | 30 | NBN                                            |
| 1062 | 2064 | 30 | NCOR1                                          |
| 1062 | 2064 | 30 | NF1                                            |
| 1062 | 2064 | 30 | NF2                                            |
| 1062 | 2064 | 30 | NFE2L2                                         |
| 1062 | 2064 | 30 | NFKBIA                                         |
| 1062 | 2064 | 30 | NKX2-1                                         |
| 1062 | 2064 | 30 | NOTCH1                                         |
| 1062 | 2064 | 30 | NOTCH2                                         |
| 1062 | 2064 | 30 | NOTCH3                                         |
| 1062 | 2064 | 30 | NOTCH4                                         |
| 1062 | 2064 | 30 | Nucleophosmin (NPM1)                           |
| 1062 | 2064 | 30 | NRAS                                           |
| 1062 | 2064 | 30 | NSD1                                           |
| 1062 | 2064 | 30 | NTRK1                                          |
| 1062 | 2064 | 30 | NTRK2                                          |
| 1062 | 2064 | 30 | NTRK3                                          |
| 1062 | 2064 | 30 | NUP93                                          |
| 1062 | 2064 | 30 | PAK3                                           |
| 1062 | 2064 | 30 | PAK7                                           |
| 1062 | 2064 | 30 | PALB2                                          |
| 1062 | 2064 | 30 | PARP1                                          |
| 1062 | 2064 | 30 | PARP2                                          |
| 1062 | 2064 | 30 | PARP3                                          |
| 1062 | 2064 | 30 | PARP4                                          |

|      |      |    |                                |
|------|------|----|--------------------------------|
| 1062 | 2064 | 30 | PAX5                           |
| 1062 | 2064 | 30 | PBRM1                          |
| 1062 | 2064 | 30 | PDGFRA                         |
| 1062 | 2064 | 30 | PDGFRB                         |
| 1062 | 2064 | 30 | PDK1                           |
| 1062 | 2064 | 30 | PIK3C2G                        |
| 1062 | 2064 | 30 | PIK3C3                         |
| 1062 | 2064 | 30 | PIK3CG                         |
| 1062 | 2064 | 30 | PIK3R1                         |
| 1062 | 2064 | 30 | PIK3R2                         |
| 1062 | 2064 | 30 | PMS2                           |
| 1062 | 2064 | 30 | PNRC1                          |
| 1062 | 2064 | 30 | PPP2R1A                        |
| 1062 | 2064 | 30 | PRDM1                          |
| 1062 | 2064 | 30 | PRKAR1A                        |
| 1062 | 2064 | 30 | PRKDC                          |
| 1062 | 2064 | 30 | PRSS8                          |
| 1062 | 2064 | 30 | PTCH1                          |
| 1062 | 2064 | 30 | Phosphatase and Tensin homolog |
| 1062 | 2064 | 30 | PTPN11                         |
| 1062 | 2064 | 30 | RAD50                          |
| 1062 | 2064 | 30 | RAD51                          |
| 1062 | 2064 | 30 | RAD51B                         |
| 1062 | 2064 | 30 | RAD51C                         |
| 1062 | 2064 | 30 | RAD51D                         |
| 1062 | 2064 | 30 | RAD52                          |
| 1062 | 2064 | 30 | RAD54L                         |
| 1062 | 2064 | 30 | RAF1                           |
| 1062 | 2064 | 30 | RARA                           |
| 1062 | 2064 | 30 | 13q14(RB1)V                    |
| 1062 | 2064 | 30 | REL                            |
| 1062 | 2064 | 30 | RET                            |
| 1062 | 2064 | 30 | RICTOR                         |
| 1062 | 2064 | 30 | RNF43                          |
| 1062 | 2064 | 30 | ROS1                           |
| 1062 | 2064 | 30 | RPA1                           |
| 1062 | 2064 | 30 | RPTOR                          |
| 1062 | 2064 | 30 | RUNX1                          |
| 1062 | 2064 | 30 | RUNX1T1                        |
| 1062 | 2064 | 30 | SETD2                          |

|      |      |    |                                   |
|------|------|----|-----------------------------------|
| 1062 | 2064 | 30 | SF3B1                             |
| 1062 | 2064 | 30 | SH2B3                             |
| 1062 | 2064 | 30 | SMAD2                             |
| 1062 | 2064 | 30 | SMAD4                             |
| 1062 | 2064 | 30 | SMARCA4                           |
| 1062 | 2064 | 30 | SMARCB1                           |
| 1062 | 2064 | 30 | SMARCD1                           |
| 1062 | 2064 | 30 | SMO                               |
| 1062 | 2064 | 30 | SOCS1                             |
| 1062 | 2064 | 30 | SOX10                             |
| 1062 | 2064 | 30 | SOX2                              |
| 1062 | 2064 | 30 | SPEN                              |
| 1062 | 2064 | 30 | SPOP                              |
| 1062 | 2064 | 30 | SRC                               |
| 1062 | 2064 | 30 | STAG2                             |
| 1062 | 2064 | 30 | STAT4                             |
| 1062 | 2064 | 30 | STK11                             |
| 1062 | 2064 | 30 | SUFU                              |
| 1062 | 2064 | 30 | SYK                               |
| 1062 | 2064 | 30 | TBX3                              |
| 1062 | 2064 | 30 | TET2                              |
| 1062 | 2064 | 30 | TGFBR2                            |
| 1062 | 2064 | 30 | TIPARP                            |
| 1062 | 2064 | 30 | TMPRSS2                           |
| 1062 | 2064 | 30 | TNFAIP3                           |
| 1062 | 2064 | 30 | TNFRSF14                          |
| 1062 | 2064 | 30 | TOP1                              |
| 1062 | 2064 | 30 | TP53                              |
| 1062 | 2064 | 30 | TRRAP                             |
| 1062 | 2064 | 30 | Tuberous sclerosis complex 1 gene |
| 1062 | 2064 | 30 | Tuberous sclerosis complex 2 gene |
| 1062 | 2064 | 30 | TSHR                              |
| 1062 | 2064 | 30 | Von Hippel-Lindau                 |
| 1062 | 2064 | 30 | WISP3                             |
| 1062 | 2064 | 30 | WT1                               |
| 1062 | 2064 | 30 | XPO1                              |
| 1062 | 2064 | 30 | XRCC3                             |
| 1062 | 2064 | 30 | ZNF217                            |
| 1063 | 2065 | 20 | ABL1                              |

|      |      |    |          |
|------|------|----|----------|
| 1063 | 2065 | 20 | AKT1     |
| 1063 | 2065 | 20 | AKT2     |
| 1063 | 2065 | 20 | AKT3     |
| 1063 | 2065 | 20 | ALK      |
| 1063 | 2065 | 20 | ALOX12B  |
| 1063 | 2065 | 20 | APC      |
| 1063 | 2065 | 20 | APCDD1   |
| 1063 | 2065 | 20 | AR       |
| 1063 | 2065 | 20 | ARAF     |
| 1063 | 2065 | 20 | ARFRP1   |
| 1063 | 2065 | 20 | ARID1A   |
| 1063 | 2065 | 20 | ARID2    |
| 1063 | 2065 | 20 | ASXL1    |
| 1063 | 2065 | 20 | ATM      |
| 1063 | 2065 | 20 | ATR      |
| 1063 | 2065 | 20 | ATRX     |
| 1063 | 2065 | 20 | AURKA    |
| 1063 | 2065 | 20 | AURKB    |
| 1063 | 2065 | 20 | AXL      |
| 1063 | 2065 | 20 | BACH1    |
| 1063 | 2065 | 20 | BAP1     |
| 1063 | 2065 | 20 | BARD1    |
| 1063 | 2065 | 20 | BCL-2    |
| 1063 | 2065 | 20 | BCL2L2   |
| 1063 | 2065 | 20 | BCL6     |
| 1063 | 2065 | 20 | BCOR     |
| 1063 | 2065 | 20 | BCORL1   |
| 1063 | 2065 | 20 | BCR      |
| 1063 | 2065 | 20 | BLM      |
| 1063 | 2065 | 20 | BRAF     |
| 1063 | 2065 | 20 | BRCA1    |
| 1063 | 2065 | 20 | BRCA2    |
| 1063 | 2065 | 20 | BRIP1    |
| 1063 | 2065 | 20 | BTG1     |
| 1063 | 2065 | 20 | BTK      |
| 1063 | 2065 | 20 | C17orf39 |
| 1063 | 2065 | 20 | CARD11   |
| 1063 | 2065 | 20 | CASP8    |
| 1063 | 2065 | 20 | CBFB     |
| 1063 | 2065 | 20 | CBL      |

|      |      |    |                                       |
|------|------|----|---------------------------------------|
| 1063 | 2065 | 20 | CCND1                                 |
| 1063 | 2065 | 20 | CCND2                                 |
| 1063 | 2065 | 20 | CCND3                                 |
| 1063 | 2065 | 20 | CCNE1                                 |
| 1063 | 2065 | 20 | CD79A                                 |
| 1063 | 2065 | 20 | CD79B                                 |
| 1063 | 2065 | 20 | CDC73                                 |
| 1063 | 2065 | 20 | CDH1                                  |
| 1063 | 2065 | 20 | CDK12                                 |
| 1063 | 2065 | 20 | Cyclin dependent kinase-4             |
| 1063 | 2065 | 20 | CDK6                                  |
| 1063 | 2065 | 20 | CDK8                                  |
| 1063 | 2065 | 20 | CDKN1B                                |
| 1063 | 2065 | 20 | CDKN2A                                |
| 1063 | 2065 | 20 | CDKN2B                                |
| 1063 | 2065 | 20 | CDKN2C                                |
| 1063 | 2065 | 20 | CCAT/enhancer binding protein (CEBPA) |
| 1063 | 2065 | 20 | CHEK1                                 |
| 1063 | 2065 | 20 | CHEK2                                 |
| 1063 | 2065 | 20 | CHUK                                  |
| 1063 | 2065 | 20 | CIC                                   |
| 1063 | 2065 | 20 | CRBN                                  |
| 1063 | 2065 | 20 | CREBBP                                |
| 1063 | 2065 | 20 | CRKL                                  |
| 1063 | 2065 | 20 | CRLF2                                 |
| 1063 | 2065 | 20 | CSF1R                                 |
| 1063 | 2065 | 20 | CTCF                                  |
| 1063 | 2065 | 20 | CTNNA1                                |
| 1063 | 2065 | 20 | CTNNB1                                |
| 1063 | 2065 | 20 | CUL4A                                 |
| 1063 | 2065 | 20 | CUL4B                                 |
| 1063 | 2065 | 20 | CYP17A1                               |
| 1063 | 2065 | 20 | DAXX                                  |
| 1063 | 2065 | 20 | DDR2                                  |
| 1063 | 2065 | 20 | DIS3                                  |
| 1063 | 2065 | 20 | DNMT3A                                |
| 1063 | 2065 | 20 | DOT1L                                 |
| 1063 | 2065 | 20 | Epidermal Growth Factor Receptor      |
| 1063 | 2065 | 20 | EMSY                                  |

|      |      |    |                              |
|------|------|----|------------------------------|
| 1063 | 2065 | 20 | EP300                        |
| 1063 | 2065 | 20 | EPHA3                        |
| 1063 | 2065 | 20 | EPHA5                        |
| 1063 | 2065 | 20 | EPHB1                        |
| 1063 | 2065 | 20 | ERBB2                        |
| 1063 | 2065 | 20 | ERBB3                        |
| 1063 | 2065 | 20 | ERBB4                        |
| 1063 | 2065 | 20 | ERG                          |
| 1063 | 2065 | 20 | Estrogen receptor 1          |
| 1063 | 2065 | 20 | ETV1                         |
| 1063 | 2065 | 20 | ETV4                         |
| 1063 | 2065 | 20 | ETV5                         |
| 1063 | 2065 | 20 | ETV6                         |
| 1063 | 2065 | 20 | EWSR1                        |
| 1063 | 2065 | 20 | EZH2                         |
| 1063 | 2065 | 20 | FAM123B(WTX)                 |
| 1063 | 2065 | 20 | FAM46C                       |
| 1063 | 2065 | 20 | FANCA                        |
| 1063 | 2065 | 20 | FANCC                        |
| 1063 | 2065 | 20 | FANCD2                       |
| 1063 | 2065 | 20 | FANCE                        |
| 1063 | 2065 | 20 | FANCF                        |
| 1063 | 2065 | 20 | FANCG                        |
| 1063 | 2065 | 20 | FANCI                        |
| 1063 | 2065 | 20 | FANCL                        |
| 1063 | 2065 | 20 | FANCM                        |
| 1063 | 2065 | 20 | FAT3                         |
| 1063 | 2065 | 20 | FBXW7                        |
| 1063 | 2065 | 20 | FGF10                        |
| 1063 | 2065 | 20 | FGF12                        |
| 1063 | 2065 | 20 | FGF14                        |
| 1063 | 2065 | 20 | Fibroblast growth factor 19  |
| 1063 | 2065 | 20 | Fibroblast growth factor 23  |
| 1063 | 2065 | 20 | Fibroblast growth factor 3   |
| 1063 | 2065 | 20 | FGF4                         |
| 1063 | 2065 | 20 | FGF6                         |
| 1063 | 2065 | 20 | FGF7                         |
| 1063 | 2065 | 20 | Fibroblast growth receptor 1 |
| 1063 | 2065 | 20 | Fibroblast growth receptor 2 |
| 1063 | 2065 | 20 | Fibroblast growth receptor 3 |



|      |      |    |                                                  |
|------|------|----|--------------------------------------------------|
| 1063 | 2065 | 20 | Fibroblast growth receptor 4                     |
| 1063 | 2065 | 20 | FLT1                                             |
| 1063 | 2065 | 20 | Fms-like tyrosine kinase 3 (FLT3)                |
| 1063 | 2065 | 20 | FLT4                                             |
| 1063 | 2065 | 20 | FOXL2                                            |
| 1063 | 2065 | 20 | GATA1                                            |
| 1063 | 2065 | 20 | GATA2                                            |
| 1063 | 2065 | 20 | GATA3                                            |
| 1063 | 2065 | 20 | GNA11                                            |
| 1063 | 2065 | 20 | GNA13                                            |
| 1063 | 2065 | 20 | GNAQ                                             |
| 1063 | 2065 | 20 | GNAS                                             |
| 1063 | 2065 | 20 | GPR124                                           |
| 1063 | 2065 | 20 | GRIN2A                                           |
| 1063 | 2065 | 20 | GSK3B                                            |
| 1063 | 2065 | 20 | Hepatocyte growth factor                         |
| 1063 | 2065 | 20 | HLA-A                                            |
| 1063 | 2065 | 20 | HRAS                                             |
| 1063 | 2065 | 20 | IDH1                                             |
| 1063 | 2065 | 20 | IDH2                                             |
| 1063 | 2065 | 20 | Insulin-like growth factor 1                     |
| 1063 | 2065 | 20 | Insulin growth factor 1 receptor                 |
| 1063 | 2065 | 20 | Insulin-like growth factor 2, also somatomedin A |
| 1063 | 2065 | 20 | IKBKE                                            |
| 1063 | 2065 | 20 | IKZF1                                            |
| 1063 | 2065 | 20 | IL7R                                             |
| 1063 | 2065 | 20 | INHBA                                            |
| 1063 | 2065 | 20 | IRF4                                             |
| 1063 | 2065 | 20 | IRS2                                             |
| 1063 | 2065 | 20 | JAK1                                             |
| 1063 | 2065 | 20 | JAK2                                             |
| 1063 | 2065 | 20 | JAK3                                             |
| 1063 | 2065 | 20 | JUN                                              |
| 1063 | 2065 | 20 | KDM5A                                            |
| 1063 | 2065 | 20 | KDM5C                                            |
| 1063 | 2065 | 20 | KDM6A                                            |
| 1063 | 2065 | 20 | KDR                                              |
| 1063 | 2065 | 20 | KEAP1                                            |
| 1063 | 2065 | 20 | KIT                                              |
| 1063 | 2065 | 20 | KLHL6                                            |

|      |      |    |                                                |
|------|------|----|------------------------------------------------|
| 1063 | 2065 | 20 | KRAS                                           |
| 1063 | 2065 | 20 | LMO1                                           |
| 1063 | 2065 | 20 | LRP1B                                          |
| 1063 | 2065 | 20 | MAP2K1                                         |
| 1063 | 2065 | 20 | MAP2K2                                         |
| 1063 | 2065 | 20 | MAP2K4                                         |
| 1063 | 2065 | 20 | MAP3K1                                         |
| 1063 | 2065 | 20 | MAP3K13                                        |
| 1063 | 2065 | 20 | MDM2                                           |
| 1063 | 2065 | 20 | MDM4                                           |
| 1063 | 2065 | 20 | MED12                                          |
| 1063 | 2065 | 20 | MEF2B                                          |
| 1063 | 2065 | 20 | MEN1                                           |
| 1063 | 2065 | 20 | MET                                            |
| 1063 | 2065 | 20 | Microphthalmia associated transcription factor |
| 1063 | 2065 | 20 | MLH1                                           |
| 1063 | 2065 | 20 | MLL                                            |
| 1063 | 2065 | 20 | MLL2                                           |
| 1063 | 2065 | 20 | MPL                                            |
| 1063 | 2065 | 20 | MRE11A                                         |
| 1063 | 2065 | 20 | MSH2                                           |
| 1063 | 2065 | 20 | MSH6                                           |
| 1063 | 2065 | 20 | MTOR                                           |
| 1063 | 2065 | 20 | MUTYH                                          |
| 1063 | 2065 | 20 | MYC                                            |
| 1063 | 2065 | 20 | MYCL1                                          |
| 1063 | 2065 | 20 | MYCN                                           |
| 1063 | 2065 | 20 | MYD88                                          |
| 1063 | 2065 | 20 | MYST3                                          |
| 1063 | 2065 | 20 | NBN                                            |
| 1063 | 2065 | 20 | NCOR1                                          |
| 1063 | 2065 | 20 | NF1                                            |
| 1063 | 2065 | 20 | NF2                                            |
| 1063 | 2065 | 20 | NFE2L2                                         |
| 1063 | 2065 | 20 | NFKBIA                                         |
| 1063 | 2065 | 20 | NKX2-1                                         |
| 1063 | 2065 | 20 | NOTCH1                                         |
| 1063 | 2065 | 20 | NOTCH2                                         |
| 1063 | 2065 | 20 | NOTCH3                                         |
| 1063 | 2065 | 20 | NOTCH4                                         |

|      |      |    |                                |
|------|------|----|--------------------------------|
| 1063 | 2065 | 20 | Nucleophosmin (NPM1)           |
| 1063 | 2065 | 20 | NRAS                           |
| 1063 | 2065 | 20 | NSD1                           |
| 1063 | 2065 | 20 | NTRK1                          |
| 1063 | 2065 | 20 | NTRK2                          |
| 1063 | 2065 | 20 | NTRK3                          |
| 1063 | 2065 | 20 | NUP93                          |
| 1063 | 2065 | 20 | PAK3                           |
| 1063 | 2065 | 20 | PAK7                           |
| 1063 | 2065 | 20 | PALB2                          |
| 1063 | 2065 | 20 | PARP1                          |
| 1063 | 2065 | 20 | PARP2                          |
| 1063 | 2065 | 20 | PARP3                          |
| 1063 | 2065 | 20 | PARP4                          |
| 1063 | 2065 | 20 | PAX5                           |
| 1063 | 2065 | 20 | PBRM1                          |
| 1063 | 2065 | 20 | PDGFRA                         |
| 1063 | 2065 | 20 | PDGFRB                         |
| 1063 | 2065 | 20 | PDK1                           |
| 1063 | 2065 | 20 | PIK3C2G                        |
| 1063 | 2065 | 20 | PIK3C3                         |
| 1063 | 2065 | 20 | PIK3CG                         |
| 1063 | 2065 | 20 | PIK3R1                         |
| 1063 | 2065 | 20 | PIK3R2                         |
| 1063 | 2065 | 20 | PMS2                           |
| 1063 | 2065 | 20 | PNRC1                          |
| 1063 | 2065 | 20 | PPP2R1A                        |
| 1063 | 2065 | 20 | PRDM1                          |
| 1063 | 2065 | 20 | PRKAR1A                        |
| 1063 | 2065 | 20 | PRKDC                          |
| 1063 | 2065 | 20 | PRSS8                          |
| 1063 | 2065 | 20 | PTCH1                          |
| 1063 | 2065 | 20 | Phosphatase and Tensin homolog |
| 1063 | 2065 | 20 | PTPN11                         |
| 1063 | 2065 | 20 | RAD50                          |
| 1063 | 2065 | 20 | RAD51                          |
| 1063 | 2065 | 20 | RAD51B                         |
| 1063 | 2065 | 20 | RAD51C                         |
| 1063 | 2065 | 20 | RAD51D                         |
| 1063 | 2065 | 20 | RAD52                          |

|      |      |    |             |
|------|------|----|-------------|
| 1063 | 2065 | 20 | RAD54L      |
| 1063 | 2065 | 20 | RAF1        |
| 1063 | 2065 | 20 | RARA        |
| 1063 | 2065 | 20 | 13q14(RB1)V |
| 1063 | 2065 | 20 | REL         |
| 1063 | 2065 | 20 | RET         |
| 1063 | 2065 | 20 | RICTOR      |
| 1063 | 2065 | 20 | RNF43       |
| 1063 | 2065 | 20 | ROS1        |
| 1063 | 2065 | 20 | RPA1        |
| 1063 | 2065 | 20 | RPTOR       |
| 1063 | 2065 | 20 | RUNX1       |
| 1063 | 2065 | 20 | RUNX1T1     |
| 1063 | 2065 | 20 | SETD2       |
| 1063 | 2065 | 20 | SF3B1       |
| 1063 | 2065 | 20 | SH2B3       |
| 1063 | 2065 | 20 | SMAD2       |
| 1063 | 2065 | 20 | SMAD4       |
| 1063 | 2065 | 20 | SMARCA4     |
| 1063 | 2065 | 20 | SMARCB1     |
| 1063 | 2065 | 20 | SMARCD1     |
| 1063 | 2065 | 20 | SMO         |
| 1063 | 2065 | 20 | SOCS1       |
| 1063 | 2065 | 20 | SOX10       |
| 1063 | 2065 | 20 | SOX2        |
| 1063 | 2065 | 20 | SPEN        |
| 1063 | 2065 | 20 | SPOP        |
| 1063 | 2065 | 20 | SRC         |
| 1063 | 2065 | 20 | STAG2       |
| 1063 | 2065 | 20 | STAT4       |
| 1063 | 2065 | 20 | STK11       |
| 1063 | 2065 | 20 | SUFU        |
| 1063 | 2065 | 20 | SYK         |
| 1063 | 2065 | 20 | TBX3        |
| 1063 | 2065 | 20 | TET2        |
| 1063 | 2065 | 20 | TGFBR2      |
| 1063 | 2065 | 20 | TIPARP      |
| 1063 | 2065 | 20 | TMPRSS2     |
| 1063 | 2065 | 20 | TNFAIP3     |
| 1063 | 2065 | 20 | TNFRSF14    |

|      |      |    |                                   |
|------|------|----|-----------------------------------|
| 1063 | 2065 | 20 | TOP1                              |
| 1063 | 2065 | 20 | TP53                              |
| 1063 | 2065 | 20 | TRRAP                             |
| 1063 | 2065 | 20 | Tuberous sclerosis complex 1 gene |
| 1063 | 2065 | 20 | Tuberous sclerosis complex 2 gene |
| 1063 | 2065 | 20 | TSHR                              |
| 1063 | 2065 | 20 | Von Hippel-Lindau                 |
| 1063 | 2065 | 20 | WISP3                             |
| 1063 | 2065 | 20 | WT1                               |
| 1063 | 2065 | 20 | XPO1                              |
| 1063 | 2065 | 20 | XRCC3                             |
| 1063 | 2065 | 20 | ZNF217                            |
| 1063 | 2065 | 20 | ZNF703                            |
| 1064 | 2066 | 30 | ABL1                              |
| 1064 | 2066 | 30 | AKT1                              |
| 1064 | 2066 | 30 | AKT2                              |
| 1064 | 2066 | 30 | AKT3                              |
| 1064 | 2066 | 30 | ALK                               |
| 1064 | 2066 | 30 | ALOX12B                           |
| 1064 | 2066 | 30 | APC                               |
| 1064 | 2066 | 30 | APCDD1                            |
| 1064 | 2066 | 30 | AR                                |
| 1064 | 2066 | 30 | ARAF                              |
| 1064 | 2066 | 30 | ARFRP1                            |
| 1064 | 2066 | 30 | ARID1A                            |
| 1064 | 2066 | 30 | ARID2                             |
| 1064 | 2066 | 30 | ASXL1                             |
| 1064 | 2066 | 30 | ATM                               |
| 1064 | 2066 | 30 | ATR                               |
| 1064 | 2066 | 30 | ATRX                              |
| 1064 | 2066 | 30 | AURKA                             |
| 1064 | 2066 | 30 | AURKB                             |
| 1064 | 2066 | 30 | AXL                               |
| 1064 | 2066 | 30 | BACH1                             |
| 1064 | 2066 | 30 | BAP1                              |
| 1064 | 2066 | 30 | BARD1                             |
| 1064 | 2066 | 30 | BCL-2                             |
| 1064 | 2066 | 30 | BCL2L2                            |
| 1064 | 2066 | 30 | BCL6                              |

|      |      |    |                                       |
|------|------|----|---------------------------------------|
| 1064 | 2066 | 30 | BCOR                                  |
| 1064 | 2066 | 30 | BCORL1                                |
| 1064 | 2066 | 30 | BCR                                   |
| 1064 | 2066 | 30 | BLM                                   |
| 1064 | 2066 | 30 | BRAF                                  |
| 1064 | 2066 | 30 | BRCA1                                 |
| 1064 | 2066 | 30 | BRCA2                                 |
| 1064 | 2066 | 30 | BRIP1                                 |
| 1064 | 2066 | 30 | BTG1                                  |
| 1064 | 2066 | 30 | BTK                                   |
| 1064 | 2066 | 30 | C17orf39                              |
| 1064 | 2066 | 30 | CARD11                                |
| 1064 | 2066 | 30 | CASP8                                 |
| 1064 | 2066 | 30 | CBFB                                  |
| 1064 | 2066 | 30 | CBL                                   |
| 1064 | 2066 | 30 | CCND2                                 |
| 1064 | 2066 | 30 | CCND3                                 |
| 1064 | 2066 | 30 | CCNE1                                 |
| 1064 | 2066 | 30 | CD79A                                 |
| 1064 | 2066 | 30 | CD79B                                 |
| 1064 | 2066 | 30 | CDC73                                 |
| 1064 | 2066 | 30 | CDK12                                 |
| 1064 | 2066 | 30 | Cyclin dependent kinase-4             |
| 1064 | 2066 | 30 | CDK6                                  |
| 1064 | 2066 | 30 | CDK8                                  |
| 1064 | 2066 | 30 | CDKN1B                                |
| 1064 | 2066 | 30 | CDKN2A                                |
| 1064 | 2066 | 30 | CDKN2B                                |
| 1064 | 2066 | 30 | CDKN2C                                |
| 1064 | 2066 | 30 | CCAT/enhancer binding protein (CEBPA) |
| 1064 | 2066 | 30 | CHEK1                                 |
| 1064 | 2066 | 30 | CHEK2                                 |
| 1064 | 2066 | 30 | CHUK                                  |
| 1064 | 2066 | 30 | CIC                                   |
| 1064 | 2066 | 30 | CRBN                                  |
| 1064 | 2066 | 30 | CREBBP                                |
| 1064 | 2066 | 30 | CRKL                                  |
| 1064 | 2066 | 30 | CRLF2                                 |
| 1064 | 2066 | 30 | CSF1R                                 |
| 1064 | 2066 | 30 | CTCF                                  |

|      |      |    |                                  |
|------|------|----|----------------------------------|
| 1064 | 2066 | 30 | CTNNA1                           |
| 1064 | 2066 | 30 | CTNNB1                           |
| 1064 | 2066 | 30 | CUL4A                            |
| 1064 | 2066 | 30 | CUL4B                            |
| 1064 | 2066 | 30 | CYP17A1                          |
| 1064 | 2066 | 30 | DAXX                             |
| 1064 | 2066 | 30 | DDR2                             |
| 1064 | 2066 | 30 | DIS3                             |
| 1064 | 2066 | 30 | DNMT3A                           |
| 1064 | 2066 | 30 | DOT1L                            |
| 1064 | 2066 | 30 | Epidermal Growth Factor Receptor |
| 1064 | 2066 | 30 | EP300                            |
| 1064 | 2066 | 30 | EPHA3                            |
| 1064 | 2066 | 30 | EPHA5                            |
| 1064 | 2066 | 30 | EPHB1                            |
| 1064 | 2066 | 30 | ERBB3                            |
| 1064 | 2066 | 30 | ERBB4                            |
| 1064 | 2066 | 30 | ERG                              |
| 1064 | 2066 | 30 | Estrogen receptor 1              |
| 1064 | 2066 | 30 | ETV1                             |
| 1064 | 2066 | 30 | ETV4                             |
| 1064 | 2066 | 30 | ETV5                             |
| 1064 | 2066 | 30 | ETV6                             |
| 1064 | 2066 | 30 | EWSR1                            |
| 1064 | 2066 | 30 | EZH2                             |
| 1064 | 2066 | 30 | FAM123B(WTX)                     |
| 1064 | 2066 | 30 | FAM46C                           |
| 1064 | 2066 | 30 | FANCA                            |
| 1064 | 2066 | 30 | FANCC                            |
| 1064 | 2066 | 30 | FANCD2                           |
| 1064 | 2066 | 30 | FANCE                            |
| 1064 | 2066 | 30 | FANCF                            |
| 1064 | 2066 | 30 | FANCG                            |
| 1064 | 2066 | 30 | FANCI                            |
| 1064 | 2066 | 30 | FANCL                            |
| 1064 | 2066 | 30 | FANCM                            |
| 1064 | 2066 | 30 | FAT3                             |
| 1064 | 2066 | 30 | FBXW7                            |
| 1064 | 2066 | 30 | FGF10                            |
| 1064 | 2066 | 30 | FGF12                            |

|      |      |    |                                                  |
|------|------|----|--------------------------------------------------|
| 1064 | 2066 | 30 | FGF14                                            |
| 1064 | 2066 | 30 | Fibroblast growth factor 23                      |
| 1064 | 2066 | 30 | FGF6                                             |
| 1064 | 2066 | 30 | FGF7                                             |
| 1064 | 2066 | 30 | Fibroblast growth receptor 1                     |
| 1064 | 2066 | 30 | Fibroblast growth receptor 2                     |
| 1064 | 2066 | 30 | Fibroblast growth receptor 3                     |
| 1064 | 2066 | 30 | Fibroblast growth receptor 4                     |
| 1064 | 2066 | 30 | FLT1                                             |
| 1064 | 2066 | 30 | Fms-like tyrosine kinase 3 (FLT3)                |
| 1064 | 2066 | 30 | FLT4                                             |
| 1064 | 2066 | 30 | FOXL2                                            |
| 1064 | 2066 | 30 | GATA1                                            |
| 1064 | 2066 | 30 | GATA2                                            |
| 1064 | 2066 | 30 | GATA3                                            |
| 1064 | 2066 | 30 | GNA11                                            |
| 1064 | 2066 | 30 | GNA13                                            |
| 1064 | 2066 | 30 | GNAQ                                             |
| 1064 | 2066 | 30 | GNAS                                             |
| 1064 | 2066 | 30 | GPR124                                           |
| 1064 | 2066 | 30 | GRIN2A                                           |
| 1064 | 2066 | 30 | GSK3B                                            |
| 1064 | 2066 | 30 | Hepatocyte growth factor                         |
| 1064 | 2066 | 30 | HLA-A                                            |
| 1064 | 2066 | 30 | HRAS                                             |
| 1064 | 2066 | 30 | IDH1                                             |
| 1064 | 2066 | 30 | IDH2                                             |
| 1064 | 2066 | 30 | Insulin-like growth factor 1                     |
| 1064 | 2066 | 30 | Insulin growth factor 1 receptor                 |
| 1064 | 2066 | 30 | Insulin-like growth factor 2, also somatomedin A |
| 1064 | 2066 | 30 | IKBKE                                            |
| 1064 | 2066 | 30 | IKZF1                                            |
| 1064 | 2066 | 30 | IL7R                                             |
| 1064 | 2066 | 30 | INHBA                                            |
| 1064 | 2066 | 30 | IRF4                                             |
| 1064 | 2066 | 30 | IRS2                                             |
| 1064 | 2066 | 30 | JAK1                                             |
| 1064 | 2066 | 30 | JAK2                                             |
| 1064 | 2066 | 30 | JAK3                                             |
| 1064 | 2066 | 30 | JUN                                              |



|      |      |    |                                                |
|------|------|----|------------------------------------------------|
| 1064 | 2066 | 30 | KDM5A                                          |
| 1064 | 2066 | 30 | KDM5C                                          |
| 1064 | 2066 | 30 | KDM6A                                          |
| 1064 | 2066 | 30 | KDR                                            |
| 1064 | 2066 | 30 | KEAP1                                          |
| 1064 | 2066 | 30 | KIT                                            |
| 1064 | 2066 | 30 | KLHL6                                          |
| 1064 | 2066 | 30 | KRAS                                           |
| 1064 | 2066 | 30 | LMO1                                           |
| 1064 | 2066 | 30 | LRP1B                                          |
| 1064 | 2066 | 30 | MAP2K1                                         |
| 1064 | 2066 | 30 | MAP2K2                                         |
| 1064 | 2066 | 30 | MAP2K4                                         |
| 1064 | 2066 | 30 | MAP3K1                                         |
| 1064 | 2066 | 30 | MAP3K13                                        |
| 1064 | 2066 | 30 | MCL1                                           |
| 1064 | 2066 | 30 | MDM2                                           |
| 1064 | 2066 | 30 | MDM4                                           |
| 1064 | 2066 | 30 | MED12                                          |
| 1064 | 2066 | 30 | MEF2B                                          |
| 1064 | 2066 | 30 | MEN1                                           |
| 1064 | 2066 | 30 | MET                                            |
| 1064 | 2066 | 30 | Microphthalmia associated transcription factor |
| 1064 | 2066 | 30 | MLH1                                           |
| 1064 | 2066 | 30 | MLL                                            |
| 1064 | 2066 | 30 | MLL2                                           |
| 1064 | 2066 | 30 | MPL                                            |
| 1064 | 2066 | 30 | MRE11A                                         |
| 1064 | 2066 | 30 | MSH2                                           |
| 1064 | 2066 | 30 | MSH6                                           |
| 1064 | 2066 | 30 | MTOR                                           |
| 1064 | 2066 | 30 | MUTYH                                          |
| 1064 | 2066 | 30 | MYC                                            |
| 1064 | 2066 | 30 | MYCL1                                          |
| 1064 | 2066 | 30 | MYCN                                           |
| 1064 | 2066 | 30 | MYD88                                          |
| 1064 | 2066 | 30 | MYST3                                          |
| 1064 | 2066 | 30 | NBN                                            |
| 1064 | 2066 | 30 | NF1                                            |
| 1064 | 2066 | 30 | NF2                                            |

|      |      |    |                      |
|------|------|----|----------------------|
| 1064 | 2066 | 30 | NFE2L2               |
| 1064 | 2066 | 30 | NFKBIA               |
| 1064 | 2066 | 30 | NKX2-1               |
| 1064 | 2066 | 30 | NOTCH1               |
| 1064 | 2066 | 30 | NOTCH2               |
| 1064 | 2066 | 30 | NOTCH3               |
| 1064 | 2066 | 30 | NOTCH4               |
| 1064 | 2066 | 30 | Nucleophosmin (NPM1) |
| 1064 | 2066 | 30 | NRAS                 |
| 1064 | 2066 | 30 | NSD1                 |
| 1064 | 2066 | 30 | NTRK1                |
| 1064 | 2066 | 30 | NTRK2                |
| 1064 | 2066 | 30 | NTRK3                |
| 1064 | 2066 | 30 | NUP93                |
| 1064 | 2066 | 30 | PAK3                 |
| 1064 | 2066 | 30 | PAK7                 |
| 1064 | 2066 | 30 | PALB2                |
| 1064 | 2066 | 30 | PARP1                |
| 1064 | 2066 | 30 | PARP2                |
| 1064 | 2066 | 30 | PARP3                |
| 1064 | 2066 | 30 | PARP4                |
| 1064 | 2066 | 30 | PAX5                 |
| 1064 | 2066 | 30 | PBRM1                |
| 1064 | 2066 | 30 | PDGFRA               |
| 1064 | 2066 | 30 | PDGFRB               |
| 1064 | 2066 | 30 | PDK1                 |
| 1064 | 2066 | 30 | PIK3C2G              |
| 1064 | 2066 | 30 | PIK3C3               |
| 1064 | 2066 | 30 | <i>PIK3CA</i>        |
| 1064 | 2066 | 30 | PIK3CG               |
| 1064 | 2066 | 30 | PIK3R1               |
| 1064 | 2066 | 30 | PIK3R2               |
| 1064 | 2066 | 30 | PMS2                 |
| 1064 | 2066 | 30 | PNRC1                |
| 1064 | 2066 | 30 | PPP2R1A              |
| 1064 | 2066 | 30 | PRDM1                |
| 1064 | 2066 | 30 | PRKAR1A              |
| 1064 | 2066 | 30 | PRKDC                |
| 1064 | 2066 | 30 | PRSS8                |
| 1064 | 2066 | 30 | PTCH1                |

|      |      |    |                                |
|------|------|----|--------------------------------|
| 1064 | 2066 | 30 | Phosphatase and Tensin homolog |
| 1064 | 2066 | 30 | PTPN11                         |
| 1064 | 2066 | 30 | RAD50                          |
| 1064 | 2066 | 30 | RAD51                          |
| 1064 | 2066 | 30 | RAD51B                         |
| 1064 | 2066 | 30 | RAD51C                         |
| 1064 | 2066 | 30 | RAD51D                         |
| 1064 | 2066 | 30 | RAD52                          |
| 1064 | 2066 | 30 | RAD54L                         |
| 1064 | 2066 | 30 | RAF1                           |
| 1064 | 2066 | 30 | RARA                           |
| 1064 | 2066 | 30 | 13q14(RB1)V                    |
| 1064 | 2066 | 30 | REL                            |
| 1064 | 2066 | 30 | RET                            |
| 1064 | 2066 | 30 | RICTOR                         |
| 1064 | 2066 | 30 | RNF43                          |
| 1064 | 2066 | 30 | ROS1                           |
| 1064 | 2066 | 30 | RPA1                           |
| 1064 | 2066 | 30 | RPTOR                          |
| 1064 | 2066 | 30 | RUNX1                          |
| 1064 | 2066 | 30 | RUNX1T1                        |
| 1064 | 2066 | 30 | SETD2                          |
| 1064 | 2066 | 30 | SF3B1                          |
| 1064 | 2066 | 30 | SH2B3                          |
| 1064 | 2066 | 30 | SMAD2                          |
| 1064 | 2066 | 30 | SMAD4                          |
| 1064 | 2066 | 30 | SMARCA4                        |
| 1064 | 2066 | 30 | SMARCB1                        |
| 1064 | 2066 | 30 | SMARCD1                        |
| 1064 | 2066 | 30 | SMO                            |
| 1064 | 2066 | 30 | SOCS1                          |
| 1064 | 2066 | 30 | SOX10                          |
| 1064 | 2066 | 30 | SOX2                           |
| 1064 | 2066 | 30 | SPEN                           |
| 1064 | 2066 | 30 | SPOP                           |
| 1064 | 2066 | 30 | SRC                            |
| 1064 | 2066 | 30 | STAG2                          |
| 1064 | 2066 | 30 | STAT4                          |
| 1064 | 2066 | 30 | STK11                          |
| 1064 | 2066 | 30 | SUFU                           |

|      |      |    |                                   |
|------|------|----|-----------------------------------|
| 1064 | 2066 | 30 | SYK                               |
| 1064 | 2066 | 30 | TET2                              |
| 1064 | 2066 | 30 | TGFBR2                            |
| 1064 | 2066 | 30 | TIPARP                            |
| 1064 | 2066 | 30 | TMPRSS2                           |
| 1064 | 2066 | 30 | TNFAIP3                           |
| 1064 | 2066 | 30 | TNFRSF14                          |
| 1064 | 2066 | 30 | TOP1                              |
| 1064 | 2066 | 30 | TP53                              |
| 1064 | 2066 | 30 | TRRAP                             |
| 1064 | 2066 | 30 | Tuberous sclerosis complex 1 gene |
| 1064 | 2066 | 30 | Tuberous sclerosis complex 2 gene |
| 1064 | 2066 | 30 | TSHR                              |
| 1064 | 2066 | 30 | Von Hippel-Lindau                 |
| 1064 | 2066 | 30 | WISP3                             |
| 1064 | 2066 | 30 | WT1                               |
| 1064 | 2066 | 30 | XPO1                              |
| 1064 | 2066 | 30 | XRCC3                             |
| 1064 | 2066 | 30 | ZNF217                            |
| 1064 | 2066 | 30 | ZNF703                            |
| 1065 | 2067 | 50 | ABL1                              |
| 1065 | 2067 | 50 | AKT1                              |
| 1065 | 2067 | 50 | AKT2                              |
| 1065 | 2067 | 50 | AKT3                              |
| 1065 | 2067 | 50 | ALK                               |
| 1065 | 2067 | 50 | ALOX12B                           |
| 1065 | 2067 | 50 | APC                               |
| 1065 | 2067 | 50 | APCDD1                            |
| 1065 | 2067 | 50 | AR                                |
| 1065 | 2067 | 50 | ARAF                              |
| 1065 | 2067 | 50 | ARFRP1                            |
| 1065 | 2067 | 50 | ARID1A                            |
| 1065 | 2067 | 50 | ARID2                             |
| 1065 | 2067 | 50 | ASXL1                             |
| 1065 | 2067 | 50 | ATR                               |
| 1065 | 2067 | 50 | ATRX                              |
| 1065 | 2067 | 50 | AURKA                             |
| 1065 | 2067 | 50 | AURKB                             |
| 1065 | 2067 | 50 | AXL                               |

|      |      |    |                                       |
|------|------|----|---------------------------------------|
| 1065 | 2067 | 50 | BACH1                                 |
| 1065 | 2067 | 50 | BAP1                                  |
| 1065 | 2067 | 50 | BARD1                                 |
| 1065 | 2067 | 50 | BCL-2                                 |
| 1065 | 2067 | 50 | BCL2L2                                |
| 1065 | 2067 | 50 | BCL6                                  |
| 1065 | 2067 | 50 | BCOR                                  |
| 1065 | 2067 | 50 | BCORL1                                |
| 1065 | 2067 | 50 | BCR                                   |
| 1065 | 2067 | 50 | BLM                                   |
| 1065 | 2067 | 50 | BRAF                                  |
| 1065 | 2067 | 50 | BRCA1                                 |
| 1065 | 2067 | 50 | BRCA2                                 |
| 1065 | 2067 | 50 | BRIP1                                 |
| 1065 | 2067 | 50 | BTG1                                  |
| 1065 | 2067 | 50 | BTK                                   |
| 1065 | 2067 | 50 | C17orf39                              |
| 1065 | 2067 | 50 | CARD11                                |
| 1065 | 2067 | 50 | CASP8                                 |
| 1065 | 2067 | 50 | CBFB                                  |
| 1065 | 2067 | 50 | CBL                                   |
| 1065 | 2067 | 50 | CCND1                                 |
| 1065 | 2067 | 50 | CCND2                                 |
| 1065 | 2067 | 50 | CCND3                                 |
| 1065 | 2067 | 50 | CCNE1                                 |
| 1065 | 2067 | 50 | CD79A                                 |
| 1065 | 2067 | 50 | CD79B                                 |
| 1065 | 2067 | 50 | CDC73                                 |
| 1065 | 2067 | 50 | CDH1                                  |
| 1065 | 2067 | 50 | CDK12                                 |
| 1065 | 2067 | 50 | Cyclin dependent kinase-4             |
| 1065 | 2067 | 50 | CDK6                                  |
| 1065 | 2067 | 50 | CDK8                                  |
| 1065 | 2067 | 50 | CDKN1B                                |
| 1065 | 2067 | 50 | CDKN2A                                |
| 1065 | 2067 | 50 | CDKN2B                                |
| 1065 | 2067 | 50 | CDKN2C                                |
| 1065 | 2067 | 50 | CCAT/enhancer binding protein (CEBPA) |
| 1065 | 2067 | 50 | CHEK1                                 |
| 1065 | 2067 | 50 | CHEK2                                 |

|      |      |    |                                  |
|------|------|----|----------------------------------|
| 1065 | 2067 | 50 | CHUK                             |
| 1065 | 2067 | 50 | CIC                              |
| 1065 | 2067 | 50 | CRBN                             |
| 1065 | 2067 | 50 | CREBBP                           |
| 1065 | 2067 | 50 | CRKL                             |
| 1065 | 2067 | 50 | CRLF2                            |
| 1065 | 2067 | 50 | CSF1R                            |
| 1065 | 2067 | 50 | CTCF                             |
| 1065 | 2067 | 50 | CTNNA1                           |
| 1065 | 2067 | 50 | CTNNB1                           |
| 1065 | 2067 | 50 | CUL4A                            |
| 1065 | 2067 | 50 | CUL4B                            |
| 1065 | 2067 | 50 | CYP17A1                          |
| 1065 | 2067 | 50 | DAXX                             |
| 1065 | 2067 | 50 | DDR2                             |
| 1065 | 2067 | 50 | DNMT3A                           |
| 1065 | 2067 | 50 | DOT1L                            |
| 1065 | 2067 | 50 | Epidermal Growth Factor Receptor |
| 1065 | 2067 | 50 | EMSY                             |
| 1065 | 2067 | 50 | EP300                            |
| 1065 | 2067 | 50 | EPHA3                            |
| 1065 | 2067 | 50 | EPHA5                            |
| 1065 | 2067 | 50 | ERBB2                            |
| 1065 | 2067 | 50 | ERBB3                            |
| 1065 | 2067 | 50 | ERBB4                            |
| 1065 | 2067 | 50 | ERG                              |
| 1065 | 2067 | 50 | ETV1                             |
| 1065 | 2067 | 50 | ETV4                             |
| 1065 | 2067 | 50 | ETV5                             |
| 1065 | 2067 | 50 | ETV6                             |
| 1065 | 2067 | 50 | EWSR1                            |
| 1065 | 2067 | 50 | EZH2                             |
| 1065 | 2067 | 50 | FAM123B(WTX)                     |
| 1065 | 2067 | 50 | FAM46C                           |
| 1065 | 2067 | 50 | FANCA                            |
| 1065 | 2067 | 50 | FANCC                            |
| 1065 | 2067 | 50 | FANCD2                           |
| 1065 | 2067 | 50 | FANCE                            |
| 1065 | 2067 | 50 | FANCF                            |
| 1065 | 2067 | 50 | FANCG                            |

|      |      |    |                                                  |
|------|------|----|--------------------------------------------------|
| 1065 | 2067 | 50 | FANCI                                            |
| 1065 | 2067 | 50 | FANCL                                            |
| 1065 | 2067 | 50 | FANCM                                            |
| 1065 | 2067 | 50 | FAT3                                             |
| 1065 | 2067 | 50 | FBXW7                                            |
| 1065 | 2067 | 50 | FGF10                                            |
| 1065 | 2067 | 50 | FGF12                                            |
| 1065 | 2067 | 50 | FGF14                                            |
| 1065 | 2067 | 50 | Fibroblast growth factor 19                      |
| 1065 | 2067 | 50 | Fibroblast growth factor 23                      |
| 1065 | 2067 | 50 | Fibroblast growth factor 3                       |
| 1065 | 2067 | 50 | FGF4                                             |
| 1065 | 2067 | 50 | FGF6                                             |
| 1065 | 2067 | 50 | FGF7                                             |
| 1065 | 2067 | 50 | Fibroblast growth receptor 1                     |
| 1065 | 2067 | 50 | Fibroblast growth receptor 2                     |
| 1065 | 2067 | 50 | Fibroblast growth receptor 3                     |
| 1065 | 2067 | 50 | Fibroblast growth receptor 4                     |
| 1065 | 2067 | 50 | FLT1                                             |
| 1065 | 2067 | 50 | Fms-like tyrosine kinase 3 (FLT3)                |
| 1065 | 2067 | 50 | FLT4                                             |
| 1065 | 2067 | 50 | FOXL2                                            |
| 1065 | 2067 | 50 | GATA1                                            |
| 1065 | 2067 | 50 | GATA2                                            |
| 1065 | 2067 | 50 | GATA3                                            |
| 1065 | 2067 | 50 | GNA11                                            |
| 1065 | 2067 | 50 | GNA13                                            |
| 1065 | 2067 | 50 | GNAQ                                             |
| 1065 | 2067 | 50 | GNAS                                             |
| 1065 | 2067 | 50 | GPR124                                           |
| 1065 | 2067 | 50 | GRIN2A                                           |
| 1065 | 2067 | 50 | GSK3B                                            |
| 1065 | 2067 | 50 | Hepatocyte growth factor                         |
| 1065 | 2067 | 50 | HLA-A                                            |
| 1065 | 2067 | 50 | HRAS                                             |
| 1065 | 2067 | 50 | IDH1                                             |
| 1065 | 2067 | 50 | IDH2                                             |
| 1065 | 2067 | 50 | Insulin-like growth factor 1                     |
| 1065 | 2067 | 50 | Insulin growth factor 1 receptor                 |
| 1065 | 2067 | 50 | Insulin-like growth factor 2, also somatomedin A |

|      |      |    |                                                |
|------|------|----|------------------------------------------------|
| 1065 | 2067 | 50 | IKBKE                                          |
| 1065 | 2067 | 50 | IKZF1                                          |
| 1065 | 2067 | 50 | IL7R                                           |
| 1065 | 2067 | 50 | INHBA                                          |
| 1065 | 2067 | 50 | IRF4                                           |
| 1065 | 2067 | 50 | IRS2                                           |
| 1065 | 2067 | 50 | JAK1                                           |
| 1065 | 2067 | 50 | JAK2                                           |
| 1065 | 2067 | 50 | JAK3                                           |
| 1065 | 2067 | 50 | JUN                                            |
| 1065 | 2067 | 50 | KDM5A                                          |
| 1065 | 2067 | 50 | KDM5C                                          |
| 1065 | 2067 | 50 | KDM6A                                          |
| 1065 | 2067 | 50 | KDR                                            |
| 1065 | 2067 | 50 | KEAP1                                          |
| 1065 | 2067 | 50 | KIT                                            |
| 1065 | 2067 | 50 | KLHL6                                          |
| 1065 | 2067 | 50 | KRAS                                           |
| 1065 | 2067 | 50 | LMO1                                           |
| 1065 | 2067 | 50 | LRP1B                                          |
| 1065 | 2067 | 50 | MAP2K1                                         |
| 1065 | 2067 | 50 | MAP2K2                                         |
| 1065 | 2067 | 50 | MAP2K4                                         |
| 1065 | 2067 | 50 | MAP3K1                                         |
| 1065 | 2067 | 50 | MAP3K13                                        |
| 1065 | 2067 | 50 | MCL1                                           |
| 1065 | 2067 | 50 | MDM2                                           |
| 1065 | 2067 | 50 | MDM4                                           |
| 1065 | 2067 | 50 | MED12                                          |
| 1065 | 2067 | 50 | MEF2B                                          |
| 1065 | 2067 | 50 | MEN1                                           |
| 1065 | 2067 | 50 | MET                                            |
| 1065 | 2067 | 50 | Microphthalmia associated transcription factor |
| 1065 | 2067 | 50 | MLH1                                           |
| 1065 | 2067 | 50 | MLL                                            |
| 1065 | 2067 | 50 | MLL2                                           |
| 1065 | 2067 | 50 | MPL                                            |
| 1065 | 2067 | 50 | MRE11A                                         |
| 1065 | 2067 | 50 | MSH2                                           |
| 1065 | 2067 | 50 | MSH6                                           |



|      |      |    |                      |
|------|------|----|----------------------|
| 1065 | 2067 | 50 | MTOR                 |
| 1065 | 2067 | 50 | MUTYH                |
| 1065 | 2067 | 50 | MYC                  |
| 1065 | 2067 | 50 | MYCL1                |
| 1065 | 2067 | 50 | MYCN                 |
| 1065 | 2067 | 50 | MYD88                |
| 1065 | 2067 | 50 | MYST3                |
| 1065 | 2067 | 50 | NBN                  |
| 1065 | 2067 | 50 | NCOR1                |
| 1065 | 2067 | 50 | NF1                  |
| 1065 | 2067 | 50 | NF2                  |
| 1065 | 2067 | 50 | NFE2L2               |
| 1065 | 2067 | 50 | NFKBIA               |
| 1065 | 2067 | 50 | NKX2-1               |
| 1065 | 2067 | 50 | NOTCH1               |
| 1065 | 2067 | 50 | NOTCH2               |
| 1065 | 2067 | 50 | NOTCH3               |
| 1065 | 2067 | 50 | NOTCH4               |
| 1065 | 2067 | 50 | Nucleophosmin (NPM1) |
| 1065 | 2067 | 50 | NRAS                 |
| 1065 | 2067 | 50 | NSD1                 |
| 1065 | 2067 | 50 | NTRK1                |
| 1065 | 2067 | 50 | NTRK2                |
| 1065 | 2067 | 50 | NTRK3                |
| 1065 | 2067 | 50 | NUP93                |
| 1065 | 2067 | 50 | PAK3                 |
| 1065 | 2067 | 50 | PAK7                 |
| 1065 | 2067 | 50 | PALB2                |
| 1065 | 2067 | 50 | PARP1                |
| 1065 | 2067 | 50 | PARP2                |
| 1065 | 2067 | 50 | PARP3                |
| 1065 | 2067 | 50 | PARP4                |
| 1065 | 2067 | 50 | PAX5                 |
| 1065 | 2067 | 50 | PBRM1                |
| 1065 | 2067 | 50 | PDGFRA               |
| 1065 | 2067 | 50 | PDGFRB               |
| 1065 | 2067 | 50 | PDK1                 |
| 1065 | 2067 | 50 | PIK3C2G              |
| 1065 | 2067 | 50 | PIK3C3               |
| 1065 | 2067 | 50 | PIK3CG               |

|      |      |    |                                |
|------|------|----|--------------------------------|
| 1065 | 2067 | 50 | PIK3R1                         |
| 1065 | 2067 | 50 | PIK3R2                         |
| 1065 | 2067 | 50 | PMS2                           |
| 1065 | 2067 | 50 | PNRC1                          |
| 1065 | 2067 | 50 | PPP2R1A                        |
| 1065 | 2067 | 50 | PRDM1                          |
| 1065 | 2067 | 50 | PRKAR1A                        |
| 1065 | 2067 | 50 | PRKDC                          |
| 1065 | 2067 | 50 | PRSS8                          |
| 1065 | 2067 | 50 | PTCH1                          |
| 1065 | 2067 | 50 | Phosphatase and Tensin homolog |
| 1065 | 2067 | 50 | PTPN11                         |
| 1065 | 2067 | 50 | RAD50                          |
| 1065 | 2067 | 50 | RAD51                          |
| 1065 | 2067 | 50 | RAD51B                         |
| 1065 | 2067 | 50 | RAD51C                         |
| 1065 | 2067 | 50 | RAD51D                         |
| 1065 | 2067 | 50 | RAD52                          |
| 1065 | 2067 | 50 | RAD54L                         |
| 1065 | 2067 | 50 | RAF1                           |
| 1065 | 2067 | 50 | RARA                           |
| 1065 | 2067 | 50 | 13q14(RB1)V                    |
| 1065 | 2067 | 50 | REL                            |
| 1065 | 2067 | 50 | RET                            |
| 1065 | 2067 | 50 | RICTOR                         |
| 1065 | 2067 | 50 | RNF43                          |
| 1065 | 2067 | 50 | ROS1                           |
| 1065 | 2067 | 50 | RPA1                           |
| 1065 | 2067 | 50 | RPTOR                          |
| 1065 | 2067 | 50 | RUNX1                          |
| 1065 | 2067 | 50 | RUNX1T1                        |
| 1065 | 2067 | 50 | SETD2                          |
| 1065 | 2067 | 50 | SF3B1                          |
| 1065 | 2067 | 50 | SH2B3                          |
| 1065 | 2067 | 50 | SMAD2                          |
| 1065 | 2067 | 50 | SMAD4                          |
| 1065 | 2067 | 50 | SMARCA4                        |
| 1065 | 2067 | 50 | SMARCB1                        |
| 1065 | 2067 | 50 | SMARCD1                        |
| 1065 | 2067 | 50 | SMO                            |

|      |      |    |                                   |
|------|------|----|-----------------------------------|
| 1065 | 2067 | 50 | SOCS1                             |
| 1065 | 2067 | 50 | SOX10                             |
| 1065 | 2067 | 50 | SOX2                              |
| 1065 | 2067 | 50 | SPEN                              |
| 1065 | 2067 | 50 | SPOP                              |
| 1065 | 2067 | 50 | SRC                               |
| 1065 | 2067 | 50 | STAG2                             |
| 1065 | 2067 | 50 | STAT4                             |
| 1065 | 2067 | 50 | STK11                             |
| 1065 | 2067 | 50 | SUFU                              |
| 1065 | 2067 | 50 | SYK                               |
| 1065 | 2067 | 50 | TBX3                              |
| 1065 | 2067 | 50 | TET2                              |
| 1065 | 2067 | 50 | TGFBR2                            |
| 1065 | 2067 | 50 | TIPARP                            |
| 1065 | 2067 | 50 | TMPRSS2                           |
| 1065 | 2067 | 50 | TNFAIP3                           |
| 1065 | 2067 | 50 | TNFRSF14                          |
| 1065 | 2067 | 50 | TOP1                              |
| 1065 | 2067 | 50 | TRRAP                             |
| 1065 | 2067 | 50 | Tuberous sclerosis complex 1 gene |
| 1065 | 2067 | 50 | Tuberous sclerosis complex 2 gene |
| 1065 | 2067 | 50 | TSHR                              |
| 1065 | 2067 | 50 | Von Hippel-Lindau                 |
| 1065 | 2067 | 50 | WISP3                             |
| 1065 | 2067 | 50 | WT1                               |
| 1065 | 2067 | 50 | XPO1                              |
| 1065 | 2067 | 50 | XRCC3                             |
| 1065 | 2067 | 50 | ZNF217                            |
| 1065 | 2067 | 50 | ZNF703                            |
| 1065 |      | 50 | EPHB1                             |
| 1065 |      | 50 | DIS3                              |
| 1066 | 2068 | 50 | ABL1                              |
| 1066 | 2068 | 50 | AKT1                              |
| 1066 | 2068 | 50 | AKT2                              |
| 1066 | 2068 | 50 | AKT3                              |
| 1066 | 2068 | 50 | ALK                               |
| 1066 | 2068 | 50 | ALOX12B                           |
| 1066 | 2068 | 50 | APC                               |

|      |      |    |          |
|------|------|----|----------|
| 1066 | 2068 | 50 | APCDD1   |
| 1066 | 2068 | 50 | AR       |
| 1066 | 2068 | 50 | ARAF     |
| 1066 | 2068 | 50 | ARID1A   |
| 1066 | 2068 | 50 | ARID2    |
| 1066 | 2068 | 50 | ASXL1    |
| 1066 | 2068 | 50 | ATM      |
| 1066 | 2068 | 50 | ATR      |
| 1066 | 2068 | 50 | ATRX     |
| 1066 | 2068 | 50 | AURKB    |
| 1066 | 2068 | 50 | AXL      |
| 1066 | 2068 | 50 | BACH1    |
| 1066 | 2068 | 50 | BAP1     |
| 1066 | 2068 | 50 | BARD1    |
| 1066 | 2068 | 50 | BCL-2    |
| 1066 | 2068 | 50 | BCL2L2   |
| 1066 | 2068 | 50 | BCL6     |
| 1066 | 2068 | 50 | BCOR     |
| 1066 | 2068 | 50 | BCORL1   |
| 1066 | 2068 | 50 | BCR      |
| 1066 | 2068 | 50 | BLM      |
| 1066 | 2068 | 50 | BRAF     |
| 1066 | 2068 | 50 | BRCA1    |
| 1066 | 2068 | 50 | BRCA2    |
| 1066 | 2068 | 50 | BRIP1    |
| 1066 | 2068 | 50 | BTG1     |
| 1066 | 2068 | 50 | BTK      |
| 1066 | 2068 | 50 | C17orf39 |
| 1066 | 2068 | 50 | CARD11   |
| 1066 | 2068 | 50 | CASP8    |
| 1066 | 2068 | 50 | CBFB     |
| 1066 | 2068 | 50 | CBL      |
| 1066 | 2068 | 50 | CCND2    |
| 1066 | 2068 | 50 | CCND3    |
| 1066 | 2068 | 50 | CCNE1    |
| 1066 | 2068 | 50 | CD79A    |
| 1066 | 2068 | 50 | CD79B    |
| 1066 | 2068 | 50 | CDC73    |
| 1066 | 2068 | 50 | CDH1     |
| 1066 | 2068 | 50 | CDK12    |

|      |      |    |                                       |
|------|------|----|---------------------------------------|
| 1066 | 2068 | 50 | Cyclin dependent kinase-4             |
| 1066 | 2068 | 50 | CDK6                                  |
| 1066 | 2068 | 50 | CDK8                                  |
| 1066 | 2068 | 50 | CDKN1B                                |
| 1066 | 2068 | 50 | CDKN2A                                |
| 1066 | 2068 | 50 | CDKN2B                                |
| 1066 | 2068 | 50 | CDKN2C                                |
| 1066 | 2068 | 50 | CCAT/enhancer binding protein (CEBPA) |
| 1066 | 2068 | 50 | CHEK1                                 |
| 1066 | 2068 | 50 | CHEK2                                 |
| 1066 | 2068 | 50 | CHUK                                  |
| 1066 | 2068 | 50 | CIC                                   |
| 1066 | 2068 | 50 | CRBN                                  |
| 1066 | 2068 | 50 | CREBBP                                |
| 1066 | 2068 | 50 | CRKL                                  |
| 1066 | 2068 | 50 | CRLF2                                 |
| 1066 | 2068 | 50 | CSF1R                                 |
| 1066 | 2068 | 50 | CTCF                                  |
| 1066 | 2068 | 50 | CTNNA1                                |
| 1066 | 2068 | 50 | CTNNB1                                |
| 1066 | 2068 | 50 | CUL4B                                 |
| 1066 | 2068 | 50 | CYP17A1                               |
| 1066 | 2068 | 50 | DAXX                                  |
| 1066 | 2068 | 50 | DDR2                                  |
| 1066 | 2068 | 50 | DIS3                                  |
| 1066 | 2068 | 50 | DNMT3A                                |
| 1066 | 2068 | 50 | DOT1L                                 |
| 1066 | 2068 | 50 | Epidermal Growth Factor Receptor      |
| 1066 | 2068 | 50 | EP300                                 |
| 1066 | 2068 | 50 | EPHA3                                 |
| 1066 | 2068 | 50 | EPHA5                                 |
| 1066 | 2068 | 50 | EPHB1                                 |
| 1066 | 2068 | 50 | ERBB2                                 |
| 1066 | 2068 | 50 | ERBB3                                 |
| 1066 | 2068 | 50 | ERBB4                                 |
| 1066 | 2068 | 50 | ERG                                   |
| 1066 | 2068 | 50 | ETV1                                  |
| 1066 | 2068 | 50 | ETV4                                  |
| 1066 | 2068 | 50 | ETV5                                  |

|      |      |    |                                   |
|------|------|----|-----------------------------------|
| 1066 | 2068 | 50 | ETV6                              |
| 1066 | 2068 | 50 | EWSR1                             |
| 1066 | 2068 | 50 | EZH2                              |
| 1066 | 2068 | 50 | FAM123B(WTX)                      |
| 1066 | 2068 | 50 | FAM46C                            |
| 1066 | 2068 | 50 | FANCA                             |
| 1066 | 2068 | 50 | FANCC                             |
| 1066 | 2068 | 50 | FANCD2                            |
| 1066 | 2068 | 50 | FANCE                             |
| 1066 | 2068 | 50 | FANCF                             |
| 1066 | 2068 | 50 | FANCG                             |
| 1066 | 2068 | 50 | FANCI                             |
| 1066 | 2068 | 50 | FANCL                             |
| 1066 | 2068 | 50 | FANCM                             |
| 1066 | 2068 | 50 | FAT3                              |
| 1066 | 2068 | 50 | FBXW7                             |
| 1066 | 2068 | 50 | FGF10                             |
| 1066 | 2068 | 50 | FGF12                             |
| 1066 | 2068 | 50 | FGF14                             |
| 1066 | 2068 | 50 | Fibroblast growth factor 23       |
| 1066 | 2068 | 50 | FGF6                              |
| 1066 | 2068 | 50 | FGF7                              |
| 1066 | 2068 | 50 | Fibroblast growth receptor 2      |
| 1066 | 2068 | 50 | Fibroblast growth receptor 3      |
| 1066 | 2068 | 50 | Fibroblast growth receptor 4      |
| 1066 | 2068 | 50 | FLT1                              |
| 1066 | 2068 | 50 | Fms-like tyrosine kinase 3 (FLT3) |
| 1066 | 2068 | 50 | FLT4                              |
| 1066 | 2068 | 50 | FOXL2                             |
| 1066 | 2068 | 50 | GATA1                             |
| 1066 | 2068 | 50 | GATA2                             |
| 1066 | 2068 | 50 | GATA3                             |
| 1066 | 2068 | 50 | GNA11                             |
| 1066 | 2068 | 50 | GNA13                             |
| 1066 | 2068 | 50 | GNAQ                              |
| 1066 | 2068 | 50 | GPR124                            |
| 1066 | 2068 | 50 | GRIN2A                            |
| 1066 | 2068 | 50 | GSK3B                             |
| 1066 | 2068 | 50 | Hepatocyte growth factor          |
| 1066 | 2068 | 50 | HLA-A                             |

|      |      |    |                                                  |
|------|------|----|--------------------------------------------------|
| 1066 | 2068 | 50 | HRAS                                             |
| 1066 | 2068 | 50 | IDH1                                             |
| 1066 | 2068 | 50 | IDH2                                             |
| 1066 | 2068 | 50 | Insulin-like growth factor 1                     |
| 1066 | 2068 | 50 | Insulin growth factor 1 receptor                 |
| 1066 | 2068 | 50 | Insulin-like growth factor 2, also somatomedin A |
| 1066 | 2068 | 50 | IKZF1                                            |
| 1066 | 2068 | 50 | IL7R                                             |
| 1066 | 2068 | 50 | INHBA                                            |
| 1066 | 2068 | 50 | IRF4                                             |
| 1066 | 2068 | 50 | IRS2                                             |
| 1066 | 2068 | 50 | JAK1                                             |
| 1066 | 2068 | 50 | JAK2                                             |
| 1066 | 2068 | 50 | JAK3                                             |
| 1066 | 2068 | 50 | JUN                                              |
| 1066 | 2068 | 50 | KDM5A                                            |
| 1066 | 2068 | 50 | KDM5C                                            |
| 1066 | 2068 | 50 | KDM6A                                            |
| 1066 | 2068 | 50 | KEAP1                                            |
| 1066 | 2068 | 50 | KLHL6                                            |
| 1066 | 2068 | 50 | KRAS                                             |
| 1066 | 2068 | 50 | LMO1                                             |
| 1066 | 2068 | 50 | LRP1B                                            |
| 1066 | 2068 | 50 | MAP2K1                                           |
| 1066 | 2068 | 50 | MAP2K2                                           |
| 1066 | 2068 | 50 | MAP2K4                                           |
| 1066 | 2068 | 50 | MAP3K1                                           |
| 1066 | 2068 | 50 | MAP3K13                                          |
| 1066 | 2068 | 50 | MDM2                                             |
| 1066 | 2068 | 50 | MED12                                            |
| 1066 | 2068 | 50 | MEF2B                                            |
| 1066 | 2068 | 50 | MEN1                                             |
| 1066 | 2068 | 50 | MET                                              |
| 1066 | 2068 | 50 | Microphthalmia associated transcription factor   |
| 1066 | 2068 | 50 | MLH1                                             |
| 1066 | 2068 | 50 | MLL                                              |
| 1066 | 2068 | 50 | MLL2                                             |
| 1066 | 2068 | 50 | MPL                                              |
| 1066 | 2068 | 50 | MRE11A                                           |

|      |      |    |                      |
|------|------|----|----------------------|
| 1066 | 2068 | 50 | MSH2                 |
| 1066 | 2068 | 50 | MSH6                 |
| 1066 | 2068 | 50 | MTOR                 |
| 1066 | 2068 | 50 | MUTYH                |
| 1066 | 2068 | 50 | MYCL1                |
| 1066 | 2068 | 50 | MYCN                 |
| 1066 | 2068 | 50 | MYD88                |
| 1066 | 2068 | 50 | NBN                  |
| 1066 | 2068 | 50 | NCOR1                |
| 1066 | 2068 | 50 | NF1                  |
| 1066 | 2068 | 50 | NF2                  |
| 1066 | 2068 | 50 | NFE2L2               |
| 1066 | 2068 | 50 | NKX2-1               |
| 1066 | 2068 | 50 | NOTCH1               |
| 1066 | 2068 | 50 | NOTCH2               |
| 1066 | 2068 | 50 | NOTCH3               |
| 1066 | 2068 | 50 | NOTCH4               |
| 1066 | 2068 | 50 | Nucleophosmin (NPM1) |
| 1066 | 2068 | 50 | NRAS                 |
| 1066 | 2068 | 50 | NSD1                 |
| 1066 | 2068 | 50 | NTRK1                |
| 1066 | 2068 | 50 | NTRK2                |
| 1066 | 2068 | 50 | NTRK3                |
| 1066 | 2068 | 50 | NUP93                |
| 1066 | 2068 | 50 | PAK3                 |
| 1066 | 2068 | 50 | PAK7                 |
| 1066 | 2068 | 50 | PALB2                |
| 1066 | 2068 | 50 | PARP1                |
| 1066 | 2068 | 50 | PARP2                |
| 1066 | 2068 | 50 | PARP3                |
| 1066 | 2068 | 50 | PARP4                |
| 1066 | 2068 | 50 | PAX5                 |
| 1066 | 2068 | 50 | PBRM1                |
| 1066 | 2068 | 50 | PDGFRB               |
| 1066 | 2068 | 50 | PDK1                 |
| 1066 | 2068 | 50 | PIK3C2G              |
| 1066 | 2068 | 50 | PIK3C3               |
| 1066 | 2068 | 50 | PIK3CG               |
| 1066 | 2068 | 50 | PIK3R1               |
| 1066 | 2068 | 50 | PIK3R2               |



|      |      |    |                                |
|------|------|----|--------------------------------|
| 1066 | 2068 | 50 | PMS2                           |
| 1066 | 2068 | 50 | PNRC1                          |
| 1066 | 2068 | 50 | PPP2R1A                        |
| 1066 | 2068 | 50 | PRDM1                          |
| 1066 | 2068 | 50 | PRKAR1A                        |
| 1066 | 2068 | 50 | PRKDC                          |
| 1066 | 2068 | 50 | PRSS8                          |
| 1066 | 2068 | 50 | PTCH1                          |
| 1066 | 2068 | 50 | Phosphatase and Tensin homolog |
| 1066 | 2068 | 50 | PTPN11                         |
| 1066 | 2068 | 50 | RAD50                          |
| 1066 | 2068 | 50 | RAD51                          |
| 1066 | 2068 | 50 | RAD51B                         |
| 1066 | 2068 | 50 | RAD51C                         |
| 1066 | 2068 | 50 | RAD51D                         |
| 1066 | 2068 | 50 | RAD52                          |
| 1066 | 2068 | 50 | RAD54L                         |
| 1066 | 2068 | 50 | RAF1                           |
| 1066 | 2068 | 50 | RARA                           |
| 1066 | 2068 | 50 | 13q14(RB1)V                    |
| 1066 | 2068 | 50 | REL                            |
| 1066 | 2068 | 50 | RET                            |
| 1066 | 2068 | 50 | RICTOR                         |
| 1066 | 2068 | 50 | RNF43                          |
| 1066 | 2068 | 50 | ROS1                           |
| 1066 | 2068 | 50 | RPA1                           |
| 1066 | 2068 | 50 | RPTOR                          |
| 1066 | 2068 | 50 | RUNX1                          |
| 1066 | 2068 | 50 | RUNX1T1                        |
| 1066 | 2068 | 50 | SETD2                          |
| 1066 | 2068 | 50 | SF3B1                          |
| 1066 | 2068 | 50 | SH2B3                          |
| 1066 | 2068 | 50 | SMAD2                          |
| 1066 | 2068 | 50 | SMAD4                          |
| 1066 | 2068 | 50 | SMARCA4                        |
| 1066 | 2068 | 50 | SMARCB1                        |
| 1066 | 2068 | 50 | SMARCD1                        |
| 1066 | 2068 | 50 | SMO                            |
| 1066 | 2068 | 50 | SOCS1                          |
| 1066 | 2068 | 50 | SOX10                          |

|      |      |    |                                   |
|------|------|----|-----------------------------------|
| 1066 | 2068 | 50 | SOX2                              |
| 1066 | 2068 | 50 | SPEN                              |
| 1066 | 2068 | 50 | SPOP                              |
| 1066 | 2068 | 50 | SRC                               |
| 1066 | 2068 | 50 | STAG2                             |
| 1066 | 2068 | 50 | STAT4                             |
| 1066 | 2068 | 50 | STK11                             |
| 1066 | 2068 | 50 | SUFU                              |
| 1066 | 2068 | 50 | SYK                               |
| 1066 | 2068 | 50 | TBX3                              |
| 1066 | 2068 | 50 | TET2                              |
| 1066 | 2068 | 50 | TGFBR2                            |
| 1066 | 2068 | 50 | TIPARP                            |
| 1066 | 2068 | 50 | TMPRSS2                           |
| 1066 | 2068 | 50 | TNFAIP3                           |
| 1066 | 2068 | 50 | TNFRSF14                          |
| 1066 | 2068 | 50 | TP53                              |
| 1066 | 2068 | 50 | TRRAP                             |
| 1066 | 2068 | 50 | Tuberous sclerosis complex 1 gene |
| 1066 | 2068 | 50 | Tuberous sclerosis complex 2 gene |
| 1066 | 2068 | 50 | TSHR                              |
| 1066 | 2068 | 50 | Von Hippel-Lindau                 |
| 1066 | 2068 | 50 | WISP3                             |
| 1066 | 2068 | 50 | WT1                               |
| 1066 | 2068 | 50 | XPO1                              |
| 1066 | 2068 | 50 | XRCC3                             |
| 1066 |      | 50 | CUL4A                             |
| 1066 | 2069 | 50 | <i>PIK3CA</i>                     |
| 1067 | 2070 | 80 | ABL1                              |
| 1067 | 2070 | 80 | AKT1                              |
| 1067 | 2070 | 80 | AKT2                              |
| 1067 | 2070 | 80 | AKT3                              |
| 1067 | 2070 | 80 | ALK                               |
| 1067 | 2070 | 80 | ALOX12B                           |
| 1067 | 2070 | 80 | APC                               |
| 1067 | 2070 | 80 | APCDD1                            |
| 1067 | 2070 | 80 | AR                                |
| 1067 | 2070 | 80 | ARAF                              |
| 1067 | 2070 | 80 | ARFRP1                            |

|      |      |    |                           |
|------|------|----|---------------------------|
| 1067 | 2070 | 80 | ARID1A                    |
| 1067 | 2070 | 80 | ARID2                     |
| 1067 | 2070 | 80 | ASXL1                     |
| 1067 | 2070 | 80 | ATM                       |
| 1067 | 2070 | 80 | ATR                       |
| 1067 | 2070 | 80 | ATRX                      |
| 1067 | 2070 | 80 | AURKA                     |
| 1067 | 2070 | 80 | AURKB                     |
| 1067 | 2070 | 80 | AXL                       |
| 1067 | 2070 | 80 | BACH1                     |
| 1067 | 2070 | 80 | BAP1                      |
| 1067 | 2070 | 80 | BARD1                     |
| 1067 | 2070 | 80 | BCL-2                     |
| 1067 | 2070 | 80 | BCL2L2                    |
| 1067 | 2070 | 80 | BCL6                      |
| 1067 | 2070 | 80 | BCOR                      |
| 1067 | 2070 | 80 | BCORL1                    |
| 1067 | 2070 | 80 | BCR                       |
| 1067 | 2070 | 80 | BLM                       |
| 1067 | 2070 | 80 | BRAF                      |
| 1067 | 2070 | 80 | BRCA1                     |
| 1067 | 2070 | 80 | BRCA2                     |
| 1067 | 2070 | 80 | BRIP1                     |
| 1067 | 2070 | 80 | BTG1                      |
| 1067 | 2070 | 80 | BTK                       |
| 1067 | 2070 | 80 | C17orf39                  |
| 1067 | 2070 | 80 | CARD11                    |
| 1067 | 2070 | 80 | CASP8                     |
| 1067 | 2070 | 80 | CBFB                      |
| 1067 | 2070 | 80 | CBL                       |
| 1067 | 2070 | 80 | CCND1                     |
| 1067 | 2070 | 80 | CCND2                     |
| 1067 | 2070 | 80 | CCND3                     |
| 1067 | 2070 | 80 | CCNE1                     |
| 1067 | 2070 | 80 | CD79A                     |
| 1067 | 2070 | 80 | CD79B                     |
| 1067 | 2070 | 80 | CDC73                     |
| 1067 | 2070 | 80 | CDH1                      |
| 1067 | 2070 | 80 | CDK12                     |
| 1067 | 2070 | 80 | Cyclin dependent kinase-4 |

|      |      |    |                                       |
|------|------|----|---------------------------------------|
| 1067 | 2070 | 80 | CDK6                                  |
| 1067 | 2070 | 80 | CDK8                                  |
| 1067 | 2070 | 80 | CDKN1B                                |
| 1067 | 2070 | 80 | CDKN2A                                |
| 1067 | 2070 | 80 | CDKN2B                                |
| 1067 | 2070 | 80 | CDKN2C                                |
| 1067 | 2070 | 80 | CCAT/enhancer binding protein (CEBPA) |
| 1067 | 2070 | 80 | CHEK1                                 |
| 1067 | 2070 | 80 | CHEK2                                 |
| 1067 | 2070 | 80 | CHUK                                  |
| 1067 | 2070 | 80 | CIC                                   |
| 1067 | 2070 | 80 | CRBN                                  |
| 1067 | 2070 | 80 | CREBBP                                |
| 1067 | 2070 | 80 | CRKL                                  |
| 1067 | 2070 | 80 | CRLF2                                 |
| 1067 | 2070 | 80 | CSF1R                                 |
| 1067 | 2070 | 80 | CTCF                                  |
| 1067 | 2070 | 80 | CTNNA1                                |
| 1067 | 2070 | 80 | CTNNB1                                |
| 1067 | 2070 | 80 | CUL4A                                 |
| 1067 | 2070 | 80 | CUL4B                                 |
| 1067 | 2070 | 80 | CYP17A1                               |
| 1067 | 2070 | 80 | DAXX                                  |
| 1067 | 2070 | 80 | DDR2                                  |
| 1067 | 2070 | 80 | DIS3                                  |
| 1067 | 2070 | 80 | DOT1L                                 |
| 1067 | 2070 | 80 | Epidermal Growth Factor Receptor      |
| 1067 | 2070 | 80 | EMSY                                  |
| 1067 | 2070 | 80 | EP300                                 |
| 1067 | 2070 | 80 | EPHA3                                 |
| 1067 | 2070 | 80 | EPHA5                                 |
| 1067 | 2070 | 80 | EPHB1                                 |
| 1067 | 2070 | 80 | ERBB2                                 |
| 1067 | 2070 | 80 | ERBB3                                 |
| 1067 | 2070 | 80 | ERBB4                                 |
| 1067 | 2070 | 80 | ERG                                   |
| 1067 | 2070 | 80 | Estrogen receptor 1                   |
| 1067 | 2070 | 80 | ETV1                                  |
| 1067 | 2070 | 80 | ETV4                                  |

|      |      |    |                                   |
|------|------|----|-----------------------------------|
| 1067 | 2070 | 80 | ETV5                              |
| 1067 | 2070 | 80 | ETV6                              |
| 1067 | 2070 | 80 | EWSR1                             |
| 1067 | 2070 | 80 | EZH2                              |
| 1067 | 2070 | 80 | FAM123B(WTX)                      |
| 1067 | 2070 | 80 | FAM46C                            |
| 1067 | 2070 | 80 | FANCA                             |
| 1067 | 2070 | 80 | FANCC                             |
| 1067 | 2070 | 80 | FANCD2                            |
| 1067 | 2070 | 80 | FANCE                             |
| 1067 | 2070 | 80 | FANCF                             |
| 1067 | 2070 | 80 | FANCG                             |
| 1067 | 2070 | 80 | FANCI                             |
| 1067 | 2070 | 80 | FANCL                             |
| 1067 | 2070 | 80 | FANCM                             |
| 1067 | 2070 | 80 | FAT3                              |
| 1067 | 2070 | 80 | FBXW7                             |
| 1067 | 2070 | 80 | FGF10                             |
| 1067 | 2070 | 80 | FGF12                             |
| 1067 | 2070 | 80 | FGF14                             |
| 1067 | 2070 | 80 | Fibroblast growth factor 19       |
| 1067 | 2070 | 80 | Fibroblast growth factor 23       |
| 1067 | 2070 | 80 | Fibroblast growth factor 3        |
| 1067 | 2070 | 80 | FGF4                              |
| 1067 | 2070 | 80 | FGF6                              |
| 1067 | 2070 | 80 | FGF7                              |
| 1067 | 2070 | 80 | Fibroblast growth receptor 1      |
| 1067 | 2070 | 80 | Fibroblast growth receptor 2      |
| 1067 | 2070 | 80 | Fibroblast growth receptor 3      |
| 1067 | 2070 | 80 | Fibroblast growth receptor 4      |
| 1067 | 2070 | 80 | FLT1                              |
| 1067 | 2070 | 80 | Fms-like tyrosine kinase 3 (FLT3) |
| 1067 | 2070 | 80 | FLT4                              |
| 1067 | 2070 | 80 | FOXL2                             |
| 1067 | 2070 | 80 | GATA1                             |
| 1067 | 2070 | 80 | GATA2                             |
| 1067 | 2070 | 80 | GATA3                             |
| 1067 | 2070 | 80 | GNA11                             |
| 1067 | 2070 | 80 | GNA13                             |
| 1067 | 2070 | 80 | GNAQ                              |

|      |      |    |                                                  |
|------|------|----|--------------------------------------------------|
| 1067 | 2070 | 80 | GNAS                                             |
| 1067 | 2070 | 80 | GPR124                                           |
| 1067 | 2070 | 80 | GRIN2A                                           |
| 1067 | 2070 | 80 | GSK3B                                            |
| 1067 | 2070 | 80 | Hepatocyte growth factor                         |
| 1067 | 2070 | 80 | HLA-A                                            |
| 1067 | 2070 | 80 | HRAS                                             |
| 1067 | 2070 | 80 | IDH1                                             |
| 1067 | 2070 | 80 | IDH2                                             |
| 1067 | 2070 | 80 | Insulin-like growth factor 1                     |
| 1067 | 2070 | 80 | Insulin growth factor 1 receptor                 |
| 1067 | 2070 | 80 | Insulin-like growth factor 2, also somatomedin A |
| 1067 | 2070 | 80 | IKBKE                                            |
| 1067 | 2070 | 80 | IKZF1                                            |
| 1067 | 2070 | 80 | IL7R                                             |
| 1067 | 2070 | 80 | INHBA                                            |
| 1067 | 2070 | 80 | IRF4                                             |
| 1067 | 2070 | 80 | IRS2                                             |
| 1067 | 2070 | 80 | JAK1                                             |
| 1067 | 2070 | 80 | JAK2                                             |
| 1067 | 2070 | 80 | JAK3                                             |
| 1067 | 2070 | 80 | JUN                                              |
| 1067 | 2070 | 80 | KDM5A                                            |
| 1067 | 2070 | 80 | KDM5C                                            |
| 1067 | 2070 | 80 | KDM6A                                            |
| 1067 | 2070 | 80 | KDR                                              |
| 1067 | 2070 | 80 | KEAP1                                            |
| 1067 | 2070 | 80 | KIT                                              |
| 1067 | 2070 | 80 | KLHL6                                            |
| 1067 | 2070 | 80 | KRAS                                             |
| 1067 | 2070 | 80 | LMO1                                             |
| 1067 | 2070 | 80 | LRP1B                                            |
| 1067 | 2070 | 80 | MAP2K1                                           |
| 1067 | 2070 | 80 | MAP2K2                                           |
| 1067 | 2070 | 80 | MAP2K4                                           |
| 1067 | 2070 | 80 | MAP3K1                                           |
| 1067 | 2070 | 80 | MAP3K13                                          |
| 1067 | 2070 | 80 | MCL1                                             |
| 1067 | 2070 | 80 | MDM2                                             |
| 1067 | 2070 | 80 | MDM4                                             |

|      |      |    |                                                |
|------|------|----|------------------------------------------------|
| 1067 | 2070 | 80 | MED12                                          |
| 1067 | 2070 | 80 | MEF2B                                          |
| 1067 | 2070 | 80 | MEN1                                           |
| 1067 | 2070 | 80 | MET                                            |
| 1067 | 2070 | 80 | Microphthalmia associated transcription factor |
| 1067 | 2070 | 80 | MLH1                                           |
| 1067 | 2070 | 80 | MLL                                            |
| 1067 | 2070 | 80 | MLL2                                           |
| 1067 | 2070 | 80 | MPL                                            |
| 1067 | 2070 | 80 | MRE11A                                         |
| 1067 | 2070 | 80 | MSH2                                           |
| 1067 | 2070 | 80 | MSH6                                           |
| 1067 | 2070 | 80 | MTOR                                           |
| 1067 | 2070 | 80 | MUTYH                                          |
| 1067 | 2070 | 80 | MYC                                            |
| 1067 | 2070 | 80 | MYCL1                                          |
| 1067 | 2070 | 80 | MYCN                                           |
| 1067 | 2070 | 80 | MYD88                                          |
| 1067 | 2070 | 80 | MYST3                                          |
| 1067 | 2070 | 80 | NBN                                            |
| 1067 | 2070 | 80 | NCOR1                                          |
| 1067 | 2070 | 80 | NF1                                            |
| 1067 | 2070 | 80 | NF2                                            |
| 1067 | 2070 | 80 | NFE2L2                                         |
| 1067 | 2070 | 80 | NFKBIA                                         |
| 1067 | 2070 | 80 | NKX2-1                                         |
| 1067 | 2070 | 80 | NOTCH1                                         |
| 1067 | 2070 | 80 | NOTCH2                                         |
| 1067 | 2070 | 80 | NOTCH3                                         |
| 1067 | 2070 | 80 | NOTCH4                                         |
| 1067 | 2070 | 80 | Nucleophosmin (NPM1)                           |
| 1067 | 2070 | 80 | NRAS                                           |
| 1067 | 2070 | 80 | NSD1                                           |
| 1067 | 2070 | 80 | NTRK1                                          |
| 1067 | 2070 | 80 | NTRK2                                          |
| 1067 | 2070 | 80 | NTRK3                                          |
| 1067 | 2070 | 80 | NUP93                                          |
| 1067 | 2070 | 80 | PAK3                                           |
| 1067 | 2070 | 80 | PAK7                                           |
| 1067 | 2070 | 80 | PALB2                                          |

|      |      |    |                                |
|------|------|----|--------------------------------|
| 1067 | 2070 | 80 | PARP1                          |
| 1067 | 2070 | 80 | PARP2                          |
| 1067 | 2070 | 80 | PARP3                          |
| 1067 | 2070 | 80 | PARP4                          |
| 1067 | 2070 | 80 | PAX5                           |
| 1067 | 2070 | 80 | PBRM1                          |
| 1067 | 2070 | 80 | PDGFRA                         |
| 1067 | 2070 | 80 | PDGFRB                         |
| 1067 | 2070 | 80 | PDK1                           |
| 1067 | 2070 | 80 | PIK3C2G                        |
| 1067 | 2070 | 80 | PIK3C3                         |
| 1067 | 2070 | 80 | PIK3CG                         |
| 1067 | 2070 | 80 | PIK3R1                         |
| 1067 | 2070 | 80 | PIK3R2                         |
| 1067 | 2070 | 80 | PMS2                           |
| 1067 | 2070 | 80 | PNRC1                          |
| 1067 | 2070 | 80 | PPP2R1A                        |
| 1067 | 2070 | 80 | PRDM1                          |
| 1067 | 2070 | 80 | PRKAR1A                        |
| 1067 | 2070 | 80 | PRKDC                          |
| 1067 | 2070 | 80 | PRSS8                          |
| 1067 | 2070 | 80 | PTCH1                          |
| 1067 | 2070 | 80 | Phosphatase and Tensin homolog |
| 1067 | 2070 | 80 | PTPN11                         |
| 1067 | 2070 | 80 | RAD50                          |
| 1067 | 2070 | 80 | RAD51                          |
| 1067 | 2070 | 80 | RAD51B                         |
| 1067 | 2070 | 80 | RAD51C                         |
| 1067 | 2070 | 80 | RAD51D                         |
| 1067 | 2070 | 80 | RAD52                          |
| 1067 | 2070 | 80 | RAD54L                         |
| 1067 | 2070 | 80 | RAF1                           |
| 1067 | 2070 | 80 | RARA                           |
| 1067 | 2070 | 80 | 13q14(RB1)V                    |
| 1067 | 2070 | 80 | REL                            |
| 1067 | 2070 | 80 | RET                            |
| 1067 | 2070 | 80 | RICTOR                         |
| 1067 | 2070 | 80 | RNF43                          |
| 1067 | 2070 | 80 | ROS1                           |
| 1067 | 2070 | 80 | RPA1                           |



|      |      |    |                                   |
|------|------|----|-----------------------------------|
| 1067 | 2070 | 80 | RPTOR                             |
| 1067 | 2070 | 80 | RUNX1                             |
| 1067 | 2070 | 80 | RUNX1T1                           |
| 1067 | 2070 | 80 | SETD2                             |
| 1067 | 2070 | 80 | SF3B1                             |
| 1067 | 2070 | 80 | SH2B3                             |
| 1067 | 2070 | 80 | SMAD2                             |
| 1067 | 2070 | 80 | SMAD4                             |
| 1067 | 2070 | 80 | SMARCA4                           |
| 1067 | 2070 | 80 | SMARCB1                           |
| 1067 | 2070 | 80 | SMARCD1                           |
| 1067 | 2070 | 80 | SMO                               |
| 1067 | 2070 | 80 | SOCS1                             |
| 1067 | 2070 | 80 | SOX10                             |
| 1067 | 2070 | 80 | SOX2                              |
| 1067 | 2070 | 80 | SPEN                              |
| 1067 | 2070 | 80 | SPOP                              |
| 1067 | 2070 | 80 | SRC                               |
| 1067 | 2070 | 80 | STAG2                             |
| 1067 | 2070 | 80 | STAT4                             |
| 1067 | 2070 | 80 | STK11                             |
| 1067 | 2070 | 80 | SUFU                              |
| 1067 | 2070 | 80 | SYK                               |
| 1067 | 2070 | 80 | TBX3                              |
| 1067 | 2070 | 80 | TET2                              |
| 1067 | 2070 | 80 | TGFBR2                            |
| 1067 | 2070 | 80 | TIPARP                            |
| 1067 | 2070 | 80 | TMPRSS2                           |
| 1067 | 2070 | 80 | TNFAIP3                           |
| 1067 | 2070 | 80 | TNFRSF14                          |
| 1067 | 2070 | 80 | TOP1                              |
| 1067 | 2070 | 80 | TP53                              |
| 1067 | 2070 | 80 | TRRAP                             |
| 1067 | 2070 | 80 | Tuberous sclerosis complex 1 gene |
| 1067 | 2070 | 80 | Tuberous sclerosis complex 2 gene |
| 1067 | 2070 | 80 | TSHR                              |
| 1067 | 2070 | 80 | Von Hippel-Lindau                 |
| 1067 | 2070 | 80 | WISP3                             |
| 1067 | 2070 | 80 | WT1                               |

|      |      |    |          |
|------|------|----|----------|
| 1067 | 2070 | 80 | XPO1     |
| 1067 | 2070 | 80 | XRCC3    |
| 1067 | 2070 | 80 | ZNF217   |
| 1067 | 2070 | 80 | ZNF703   |
| 1068 | 2071 | 30 | ABL1     |
| 1068 | 2071 | 30 | AKT1     |
| 1068 | 2071 | 30 | AKT2     |
| 1068 | 2071 | 30 | AKT3     |
| 1068 | 2071 | 30 | ALK      |
| 1068 | 2071 | 30 | ALOX12B  |
| 1068 | 2071 | 30 | APC      |
| 1068 | 2071 | 30 | APCDD1   |
| 1068 | 2071 | 30 | AR       |
| 1068 | 2071 | 30 | ARAF     |
| 1068 | 2071 | 30 | ARFRP1   |
| 1068 | 2071 | 30 | ARID2    |
| 1068 | 2071 | 30 | ASXL1    |
| 1068 | 2071 | 30 | ATM      |
| 1068 | 2071 | 30 | ATR      |
| 1068 | 2071 | 30 | ATRX     |
| 1068 | 2071 | 30 | AURKA    |
| 1068 | 2071 | 30 | AURKB    |
| 1068 | 2071 | 30 | AXL      |
| 1068 | 2071 | 30 | BACH1    |
| 1068 | 2071 | 30 | BAP1     |
| 1068 | 2071 | 30 | BARD1    |
| 1068 | 2071 | 30 | BCL-2    |
| 1068 | 2071 | 30 | BCL2L2   |
| 1068 | 2071 | 30 | BCL6     |
| 1068 | 2071 | 30 | BCOR     |
| 1068 | 2071 | 30 | BCORL1   |
| 1068 | 2071 | 30 | BCR      |
| 1068 | 2071 | 30 | BLM      |
| 1068 | 2071 | 30 | BRAF     |
| 1068 | 2071 | 30 | BRCA1    |
| 1068 | 2071 | 30 | BRCA2    |
| 1068 | 2071 | 30 | BRIP1    |
| 1068 | 2071 | 30 | BTG1     |
| 1068 | 2071 | 30 | BTK      |
| 1068 | 2071 | 30 | C17orf39 |

|      |      |    |                                       |
|------|------|----|---------------------------------------|
| 1068 | 2071 | 30 | CARD11                                |
| 1068 | 2071 | 30 | CASP8                                 |
| 1068 | 2071 | 30 | CBFB                                  |
| 1068 | 2071 | 30 | CBL                                   |
| 1068 | 2071 | 30 | CCND1                                 |
| 1068 | 2071 | 30 | CCND2                                 |
| 1068 | 2071 | 30 | CCND3                                 |
| 1068 | 2071 | 30 | CCNE1                                 |
| 1068 | 2071 | 30 | CD79A                                 |
| 1068 | 2071 | 30 | CD79B                                 |
| 1068 | 2071 | 30 | CDC73                                 |
| 1068 | 2071 | 30 | CDH1                                  |
| 1068 | 2071 | 30 | CDK12                                 |
| 1068 | 2071 | 30 | Cyclin dependent kinase-4             |
| 1068 | 2071 | 30 | CDK6                                  |
| 1068 | 2071 | 30 | CDK8                                  |
| 1068 | 2071 | 30 | CDKN1B                                |
| 1068 | 2071 | 30 | CDKN2A                                |
| 1068 | 2071 | 30 | CDKN2B                                |
| 1068 | 2071 | 30 | CDKN2C                                |
| 1068 | 2071 | 30 | CCAT/enhancer binding protein (CEBPA) |
| 1068 | 2071 | 30 | CHEK1                                 |
| 1068 | 2071 | 30 | CHEK2                                 |
| 1068 | 2071 | 30 | CHUK                                  |
| 1068 | 2071 | 30 | CIC                                   |
| 1068 | 2071 | 30 | CRBN                                  |
| 1068 | 2071 | 30 | CREBBP                                |
| 1068 | 2071 | 30 | CRKL                                  |
| 1068 | 2071 | 30 | CRLF2                                 |
| 1068 | 2071 | 30 | CSF1R                                 |
| 1068 | 2071 | 30 | CTCF                                  |
| 1068 | 2071 | 30 | CTNNA1                                |
| 1068 | 2071 | 30 | CTNNB1                                |
| 1068 | 2071 | 30 | CUL4A                                 |
| 1068 | 2071 | 30 | CUL4B                                 |
| 1068 | 2071 | 30 | CYP17A1                               |
| 1068 | 2071 | 30 | DAXX                                  |
| 1068 | 2071 | 30 | DDR2                                  |
| 1068 | 2071 | 30 | DIS3                                  |
| 1068 | 2071 | 30 | DNMT3A                                |

|      |      |    |                                  |
|------|------|----|----------------------------------|
| 1068 | 2071 | 30 | DOT1L                            |
| 1068 | 2071 | 30 | Epidermal Growth Factor Receptor |
| 1068 | 2071 | 30 | EMSY                             |
| 1068 | 2071 | 30 | EP300                            |
| 1068 | 2071 | 30 | EPHA3                            |
| 1068 | 2071 | 30 | EPHA5                            |
| 1068 | 2071 | 30 | EPHB1                            |
| 1068 | 2071 | 30 | ERBB2                            |
| 1068 | 2071 | 30 | ERBB3                            |
| 1068 | 2071 | 30 | ERBB4                            |
| 1068 | 2071 | 30 | ERG                              |
| 1068 | 2071 | 30 | Estrogen receptor 1              |
| 1068 | 2071 | 30 | ETV1                             |
| 1068 | 2071 | 30 | ETV4                             |
| 1068 | 2071 | 30 | ETV5                             |
| 1068 | 2071 | 30 | ETV6                             |
| 1068 | 2071 | 30 | EWSR1                            |
| 1068 | 2071 | 30 | EZH2                             |
| 1068 | 2071 | 30 | FAM123B(WTX)                     |
| 1068 | 2071 | 30 | FAM46C                           |
| 1068 | 2071 | 30 | FANCA                            |
| 1068 | 2071 | 30 | FANCC                            |
| 1068 | 2071 | 30 | FANCD2                           |
| 1068 | 2071 | 30 | FANCE                            |
| 1068 | 2071 | 30 | FANCF                            |
| 1068 | 2071 | 30 | FANCG                            |
| 1068 | 2071 | 30 | FANCI                            |
| 1068 | 2071 | 30 | FANCL                            |
| 1068 | 2071 | 30 | FANCM                            |
| 1068 | 2071 | 30 | FAT3                             |
| 1068 | 2071 | 30 | FBXW7                            |
| 1068 | 2071 | 30 | FGF10                            |
| 1068 | 2071 | 30 | FGF12                            |
| 1068 | 2071 | 30 | FGF14                            |
| 1068 | 2071 | 30 | Fibroblast growth factor 19      |
| 1068 | 2071 | 30 | Fibroblast growth factor 23      |
| 1068 | 2071 | 30 | Fibroblast growth factor 3       |
| 1068 | 2071 | 30 | FGF4                             |
| 1068 | 2071 | 30 | FGF6                             |
| 1068 | 2071 | 30 | FGF7                             |

|      |      |    |                                                  |
|------|------|----|--------------------------------------------------|
| 1068 | 2071 | 30 | Fibroblast growth receptor 1                     |
| 1068 | 2071 | 30 | Fibroblast growth receptor 2                     |
| 1068 | 2071 | 30 | Fibroblast growth receptor 3                     |
| 1068 | 2071 | 30 | Fibroblast growth receptor 4                     |
| 1068 | 2071 | 30 | FLT1                                             |
| 1068 | 2071 | 30 | Fms-like tyrosine kinase 3 (FLT3)                |
| 1068 | 2071 | 30 | FLT4                                             |
| 1068 | 2071 | 30 | FOXL2                                            |
| 1068 | 2071 | 30 | GATA1                                            |
| 1068 | 2071 | 30 | GATA2                                            |
| 1068 | 2071 | 30 | GATA3                                            |
| 1068 | 2071 | 30 | GNA11                                            |
| 1068 | 2071 | 30 | GNA13                                            |
| 1068 | 2071 | 30 | GNAQ                                             |
| 1068 | 2071 | 30 | GNAS                                             |
| 1068 | 2071 | 30 | GPR124                                           |
| 1068 | 2071 | 30 | GRIN2A                                           |
| 1068 | 2071 | 30 | GSK3B                                            |
| 1068 | 2071 | 30 | Hepatocyte growth factor                         |
| 1068 | 2071 | 30 | HLA-A                                            |
| 1068 | 2071 | 30 | HRAS                                             |
| 1068 | 2071 | 30 | IDH1                                             |
| 1068 | 2071 | 30 | IDH2                                             |
| 1068 | 2071 | 30 | Insulin-like growth factor 1                     |
| 1068 | 2071 | 30 | Insulin growth factor 1 receptor                 |
| 1068 | 2071 | 30 | Insulin-like growth factor 2, also somatomedin A |
| 1068 | 2071 | 30 | IKBKE                                            |
| 1068 | 2071 | 30 | IKZF1                                            |
| 1068 | 2071 | 30 | IL7R                                             |
| 1068 | 2071 | 30 | INHBA                                            |
| 1068 | 2071 | 30 | IRF4                                             |
| 1068 | 2071 | 30 | IRS2                                             |
| 1068 | 2071 | 30 | JAK1                                             |
| 1068 | 2071 | 30 | JAK2                                             |
| 1068 | 2071 | 30 | JAK3                                             |
| 1068 | 2071 | 30 | JUN                                              |
| 1068 | 2071 | 30 | KDM5A                                            |
| 1068 | 2071 | 30 | KDM5C                                            |
| 1068 | 2071 | 30 | KDM6A                                            |
| 1068 | 2071 | 30 | KDR                                              |

|      |      |    |                                                |
|------|------|----|------------------------------------------------|
| 1068 | 2071 | 30 | KEAP1                                          |
| 1068 | 2071 | 30 | KIT                                            |
| 1068 | 2071 | 30 | KLHL6                                          |
| 1068 | 2071 | 30 | KRAS                                           |
| 1068 | 2071 | 30 | LMO1                                           |
| 1068 | 2071 | 30 | LRP1B                                          |
| 1068 | 2071 | 30 | MAP2K1                                         |
| 1068 | 2071 | 30 | MAP2K2                                         |
| 1068 | 2071 | 30 | MAP2K4                                         |
| 1068 | 2071 | 30 | MAP3K13                                        |
| 1068 | 2071 | 30 | MCL1                                           |
| 1068 | 2071 | 30 | MDM2                                           |
| 1068 | 2071 | 30 | MDM4                                           |
| 1068 | 2071 | 30 | MED12                                          |
| 1068 | 2071 | 30 | MEF2B                                          |
| 1068 | 2071 | 30 | MEN1                                           |
| 1068 | 2071 | 30 | MET                                            |
| 1068 | 2071 | 30 | Microphthalmia associated transcription factor |
| 1068 | 2071 | 30 | MLH1                                           |
| 1068 | 2071 | 30 | MLL                                            |
| 1068 | 2071 | 30 | MLL2                                           |
| 1068 | 2071 | 30 | MPL                                            |
| 1068 | 2071 | 30 | MRE11A                                         |
| 1068 | 2071 | 30 | MSH2                                           |
| 1068 | 2071 | 30 | MSH6                                           |
| 1068 | 2071 | 30 | MTOR                                           |
| 1068 | 2071 | 30 | MUTYH                                          |
| 1068 | 2071 | 30 | MYCL1                                          |
| 1068 | 2071 | 30 | MYCN                                           |
| 1068 | 2071 | 30 | MYD88                                          |
| 1068 | 2071 | 30 | MYST3                                          |
| 1068 | 2071 | 30 | NBN                                            |
| 1068 | 2071 | 30 | NCOR1                                          |
| 1068 | 2071 | 30 | NF1                                            |
| 1068 | 2071 | 30 | NF2                                            |
| 1068 | 2071 | 30 | NFE2L2                                         |
| 1068 | 2071 | 30 | NFKBIA                                         |
| 1068 | 2071 | 30 | NKX2-1                                         |
| 1068 | 2071 | 30 | NOTCH1                                         |
| 1068 | 2071 | 30 | NOTCH2                                         |

|      |      |    |                                |
|------|------|----|--------------------------------|
| 1068 | 2071 | 30 | NOTCH3                         |
| 1068 | 2071 | 30 | NOTCH4                         |
| 1068 | 2071 | 30 | Nucleophosmin (NPM1)           |
| 1068 | 2071 | 30 | NRAS                           |
| 1068 | 2071 | 30 | NSD1                           |
| 1068 | 2071 | 30 | NTRK1                          |
| 1068 | 2071 | 30 | NTRK2                          |
| 1068 | 2071 | 30 | NTRK3                          |
| 1068 | 2071 | 30 | NUP93                          |
| 1068 | 2071 | 30 | PAK3                           |
| 1068 | 2071 | 30 | PAK7                           |
| 1068 | 2071 | 30 | PALB2                          |
| 1068 | 2071 | 30 | PARP1                          |
| 1068 | 2071 | 30 | PARP2                          |
| 1068 | 2071 | 30 | PARP3                          |
| 1068 | 2071 | 30 | PARP4                          |
| 1068 | 2071 | 30 | PAX5                           |
| 1068 | 2071 | 30 | PBRM1                          |
| 1068 | 2071 | 30 | PDGFRA                         |
| 1068 | 2071 | 30 | PDGFRB                         |
| 1068 | 2071 | 30 | PDK1                           |
| 1068 | 2071 | 30 | PIK3C2G                        |
| 1068 | 2071 | 30 | PIK3C3                         |
| 1068 | 2071 | 30 | PIK3CG                         |
| 1068 | 2071 | 30 | PIK3R1                         |
| 1068 | 2071 | 30 | PIK3R2                         |
| 1068 | 2071 | 30 | PMS2                           |
| 1068 | 2071 | 30 | PNRC1                          |
| 1068 | 2071 | 30 | PPP2R1A                        |
| 1068 | 2071 | 30 | PRDM1                          |
| 1068 | 2071 | 30 | PRKAR1A                        |
| 1068 | 2071 | 30 | PRKDC                          |
| 1068 | 2071 | 30 | PRSS8                          |
| 1068 | 2071 | 30 | PTCH1                          |
| 1068 | 2071 | 30 | Phosphatase and Tensin homolog |
| 1068 | 2071 | 30 | PTPN11                         |
| 1068 | 2071 | 30 | RAD50                          |
| 1068 | 2071 | 30 | RAD51                          |
| 1068 | 2071 | 30 | RAD51B                         |
| 1068 | 2071 | 30 | RAD51C                         |

|      |      |    |             |
|------|------|----|-------------|
| 1068 | 2071 | 30 | RAD51D      |
| 1068 | 2071 | 30 | RAD52       |
| 1068 | 2071 | 30 | RAD54L      |
| 1068 | 2071 | 30 | RAF1        |
| 1068 | 2071 | 30 | RARA        |
| 1068 | 2071 | 30 | 13q14(RB1)V |
| 1068 | 2071 | 30 | REL         |
| 1068 | 2071 | 30 | RET         |
| 1068 | 2071 | 30 | RICTOR      |
| 1068 | 2071 | 30 | RNF43       |
| 1068 | 2071 | 30 | ROS1        |
| 1068 | 2071 | 30 | RPA1        |
| 1068 | 2071 | 30 | RPTOR       |
| 1068 | 2071 | 30 | RUNX1       |
| 1068 | 2071 | 30 | RUNX1T1     |
| 1068 | 2071 | 30 | SETD2       |
| 1068 | 2071 | 30 | SF3B1       |
| 1068 | 2071 | 30 | SH2B3       |
| 1068 | 2071 | 30 | SMAD2       |
| 1068 | 2071 | 30 | SMAD4       |
| 1068 | 2071 | 30 | SMARCA4     |
| 1068 | 2071 | 30 | SMARCB1     |
| 1068 | 2071 | 30 | SMARCD1     |
| 1068 | 2071 | 30 | SMO         |
| 1068 | 2071 | 30 | SOCS1       |
| 1068 | 2071 | 30 | SOX10       |
| 1068 | 2071 | 30 | SOX2        |
| 1068 | 2071 | 30 | SPEN        |
| 1068 | 2071 | 30 | SPOP        |
| 1068 | 2071 | 30 | SRC         |
| 1068 | 2071 | 30 | STAG2       |
| 1068 | 2071 | 30 | STAT4       |
| 1068 | 2071 | 30 | STK11       |
| 1068 | 2071 | 30 | SUFU        |
| 1068 | 2071 | 30 | SYK         |
| 1068 | 2071 | 30 | TBX3        |
| 1068 | 2071 | 30 | TET2        |
| 1068 | 2071 | 30 | TGFBR2      |
| 1068 | 2071 | 30 | TIPARP      |
| 1068 | 2071 | 30 | TMPRSS2     |



|      |      |    |                                   |
|------|------|----|-----------------------------------|
| 1068 | 2071 | 30 | TNFAIP3                           |
| 1068 | 2071 | 30 | TNFRSF14                          |
| 1068 | 2071 | 30 | TOP1                              |
| 1068 | 2071 | 30 | TP53                              |
| 1068 | 2071 | 30 | TRRAP                             |
| 1068 | 2071 | 30 | Tuberous sclerosis complex 1 gene |
| 1068 | 2071 | 30 | Tuberous sclerosis complex 2 gene |
| 1068 | 2071 | 30 | TSHR                              |
| 1068 | 2071 | 30 | Von Hippel-Lindau                 |
| 1068 | 2071 | 30 | WISP3                             |
| 1068 | 2071 | 30 | WT1                               |
| 1068 | 2071 | 30 | XPO1                              |
| 1068 | 2071 | 30 | XRCC3                             |
| 1068 | 2071 | 30 | ZNF217                            |
| 1077 | 2080 | 70 | ABL1                              |
| 1077 | 2080 | 70 | ABL2                              |
| 1077 | 2080 | 70 | AKT1                              |
| 1077 | 2080 | 70 | AKT2                              |
| 1077 | 2080 | 70 | AKT3                              |
| 1077 | 2080 | 70 | ALK                               |
| 1077 | 2080 | 70 | APC                               |
| 1077 | 2080 | 70 | AR                                |
| 1077 | 2080 | 70 | ARAF                              |
| 1077 | 2080 | 70 | ARFRP1                            |
| 1077 | 2080 | 70 | ARID1A                            |
| 1077 | 2080 | 70 | ATM                               |
| 1077 | 2080 | 70 | ATR                               |
| 1077 | 2080 | 70 | AURKA                             |
| 1077 | 2080 | 70 | AURKB                             |
| 1077 | 2080 | 70 | BAP1                              |
| 1077 | 2080 | 70 | BCL-2                             |
| 1077 | 2080 | 70 | BCL2A1                            |
| 1077 | 2080 | 70 | BCL2L1                            |
| 1077 | 2080 | 70 | BCL2L2                            |
| 1077 | 2080 | 70 | BCL6                              |
| 1077 | 2080 | 70 | BCR                               |
| 1077 | 2080 | 70 | BRAF                              |
| 1077 | 2080 | 70 | BRCA1                             |
| 1077 | 2080 | 70 | BRCA2                             |

|      |      |    |                                       |
|------|------|----|---------------------------------------|
| 1077 | 2080 | 70 | CARD11                                |
| 1077 | 2080 | 70 | CBL                                   |
| 1077 | 2080 | 70 | CCND1                                 |
| 1077 | 2080 | 70 | CCND2                                 |
| 1077 | 2080 | 70 | CCND3                                 |
| 1077 | 2080 | 70 | CCNE1                                 |
| 1077 | 2080 | 70 | CD79A                                 |
| 1077 | 2080 | 70 | CD79B                                 |
| 1077 | 2080 | 70 | CDH1                                  |
| 1077 | 2080 | 70 | CDH2                                  |
| 1077 | 2080 | 70 | CDH20                                 |
| 1077 | 2080 | 70 | CDH5                                  |
| 1077 | 2080 | 70 | Cyclin dependent kinase-4             |
| 1077 | 2080 | 70 | CDK6                                  |
| 1077 | 2080 | 70 | CDK8                                  |
| 1077 | 2080 | 70 | CDKN2A                                |
| 1077 | 2080 | 70 | CDKN2B                                |
| 1077 | 2080 | 70 | CDKN2C                                |
| 1077 | 2080 | 70 | CCAT/enhancer binding protein (CEBPA) |
| 1077 | 2080 | 70 | CHEK1                                 |
| 1077 | 2080 | 70 | CHEK2                                 |
| 1077 | 2080 | 70 | CRKL                                  |
| 1077 | 2080 | 70 | CRLF2                                 |
| 1077 | 2080 | 70 | CTNNB1                                |
| 1077 | 2080 | 70 | DDR2                                  |
| 1077 | 2080 | 70 | DNMT3A                                |
| 1077 | 2080 | 70 | DOT1L                                 |
| 1077 | 2080 | 70 | Epidermal Growth Factor Receptor      |
| 1077 | 2080 | 70 | EPHA3                                 |
| 1077 | 2080 | 70 | EPHA5                                 |
| 1077 | 2080 | 70 | EPHA6                                 |
| 1077 | 2080 | 70 | EPHA7                                 |
| 1077 | 2080 | 70 | EPHB1                                 |
| 1077 | 2080 | 70 | EPHB4                                 |
| 1077 | 2080 | 70 | EPHB6                                 |
| 1077 | 2080 | 70 | ERBB2                                 |
| 1077 | 2080 | 70 | ERBB3                                 |
| 1077 | 2080 | 70 | ERBB4                                 |
| 1077 | 2080 | 70 | ERCC2                                 |

|      |      |    |                                   |
|------|------|----|-----------------------------------|
| 1077 | 2080 | 70 | ERG                               |
| 1077 | 2080 | 70 | Estrogen receptor 1               |
| 1077 | 2080 | 70 | ETV1                              |
| 1077 | 2080 | 70 | ETV4                              |
| 1077 | 2080 | 70 | ETV5                              |
| 1077 | 2080 | 70 | ETV6                              |
| 1077 | 2080 | 70 | EWSR1                             |
| 1077 | 2080 | 70 | EZH2                              |
| 1077 | 2080 | 70 | FANCA                             |
| 1077 | 2080 | 70 | FBXW7                             |
| 1077 | 2080 | 70 | Fibroblast growth receptor 1      |
| 1077 | 2080 | 70 | Fibroblast growth receptor 3      |
| 1077 | 2080 | 70 | Fibroblast growth receptor 4      |
| 1077 | 2080 | 70 | FLT1                              |
| 1077 | 2080 | 70 | Fms-like tyrosine kinase 3 (FLT3) |
| 1077 | 2080 | 70 | FLT4                              |
| 1077 | 2080 | 70 | FOXP4                             |
| 1077 | 2080 | 70 | GATA1                             |
| 1077 | 2080 | 70 | GNA11                             |
| 1077 | 2080 | 70 | GNAQ                              |
| 1077 | 2080 | 70 | GNAS                              |
| 1077 | 2080 | 70 | GPR124                            |
| 1077 | 2080 | 70 | GUCY1A2                           |
| 1077 | 2080 | 70 | HOXA3                             |
| 1077 | 2080 | 70 | HRAS                              |
| 1077 | 2080 | 70 | HSP90AA1                          |
| 1077 | 2080 | 70 | IDH1                              |
| 1077 | 2080 | 70 | IDH2                              |
| 1077 | 2080 | 70 | Insulin growth factor 1 receptor  |
| 1077 | 2080 | 70 | IGF2R                             |
| 1077 | 2080 | 70 | IKBKE                             |
| 1077 | 2080 | 70 | IKZF1                             |
| 1077 | 2080 | 70 | INHBA                             |
| 1077 | 2080 | 70 | INSR                              |
| 1077 | 2080 | 70 | IRS2                              |
| 1077 | 2080 | 70 | JAK1                              |
| 1077 | 2080 | 70 | JAK2                              |
| 1077 | 2080 | 70 | JAK3                              |
| 1077 | 2080 | 70 | JUN                               |
| 1077 | 2080 | 70 | KDM6A                             |

|      |      |    |                                                |
|------|------|----|------------------------------------------------|
| 1077 | 2080 | 70 | KDR                                            |
| 1077 | 2080 | 70 | KIT                                            |
| 1077 | 2080 | 70 | KRAS                                           |
| 1077 | 2080 | 70 | LRP1B                                          |
| 1077 | 2080 | 70 | LRP6                                           |
| 1077 | 2080 | 70 | LTK                                            |
| 1077 | 2080 | 70 | MAP2K1                                         |
| 1077 | 2080 | 70 | MAP2K2                                         |
| 1077 | 2080 | 70 | MAP2K4                                         |
| 1077 | 2080 | 70 | MCL1                                           |
| 1077 | 2080 | 70 | MDM2                                           |
| 1077 | 2080 | 70 | MDM4                                           |
| 1077 | 2080 | 70 | MEN1                                           |
| 1077 | 2080 | 70 | MET                                            |
| 1077 | 2080 | 70 | Microphthalmia associated transcription factor |
| 1077 | 2080 | 70 | MLH1                                           |
| 1077 | 2080 | 70 | MLL                                            |
| 1077 | 2080 | 70 | MPL                                            |
| 1077 | 2080 | 70 | MRE11A                                         |
| 1077 | 2080 | 70 | MSH2                                           |
| 1077 | 2080 | 70 | MSH6                                           |
| 1077 | 2080 | 70 | MTOR                                           |
| 1077 | 2080 | 70 | MUTYH                                          |
| 1077 | 2080 | 70 | MYCL1                                          |
| 1077 | 2080 | 70 | MYCN                                           |
| 1077 | 2080 | 70 | NF1                                            |
| 1077 | 2080 | 70 | NF2                                            |
| 1077 | 2080 | 70 | NKX2-1                                         |
| 1077 | 2080 | 70 | NOTCH1                                         |
| 1077 | 2080 | 70 | Nucleophosmin (NPM1)                           |
| 1077 | 2080 | 70 | NRAS                                           |
| 1077 | 2080 | 70 | NTRK1                                          |
| 1077 | 2080 | 70 | NTRK2                                          |
| 1077 | 2080 | 70 | NTRK3                                          |
| 1077 | 2080 | 70 | PAK3                                           |
| 1077 | 2080 | 70 | PAX5                                           |
| 1077 | 2080 | 70 | PDGFRA                                         |
| 1077 | 2080 | 70 | PDGFRB                                         |
| 1077 | 2080 | 70 | PHLPP2                                         |
| 1077 | 2080 | 70 | PIK3CG                                         |

|      |      |    |                                   |
|------|------|----|-----------------------------------|
| 1077 | 2080 | 70 | PIK3R1                            |
| 1077 | 2080 | 70 | PKHD1                             |
| 1077 | 2080 | 70 | PLCG1                             |
| 1077 | 2080 | 70 | PRKDC                             |
| 1077 | 2080 | 70 | PTCH1                             |
| 1077 | 2080 | 70 | PTCH2                             |
| 1077 | 2080 | 70 | Phosphatase and Tensin homolog    |
| 1077 | 2080 | 70 | PTPN11                            |
| 1077 | 2080 | 70 | PTPRD                             |
| 1077 | 2080 | 70 | RAF1                              |
| 1077 | 2080 | 70 | RARA                              |
| 1077 | 2080 | 70 | 13q14(RB1)V                       |
| 1077 | 2080 | 70 | RET                               |
| 1077 | 2080 | 70 | RICTOR                            |
| 1077 | 2080 | 70 | RPTOR                             |
| 1077 | 2080 | 70 | RUNX1                             |
| 1077 | 2080 | 70 | SMAD2                             |
| 1077 | 2080 | 70 | SMAD3                             |
| 1077 | 2080 | 70 | SMAD4                             |
| 1077 | 2080 | 70 | SMARCA4                           |
| 1077 | 2080 | 70 | SMARCB1                           |
| 1077 | 2080 | 70 | SMO                               |
| 1077 | 2080 | 70 | SOX10                             |
| 1077 | 2080 | 70 | SOX2                              |
| 1077 | 2080 | 70 | SRC                               |
| 1077 | 2080 | 70 | STAT3                             |
| 1077 | 2080 | 70 | STK11                             |
| 1077 | 2080 | 70 | SUFU                              |
| 1077 | 2080 | 70 | TBX22                             |
| 1077 | 2080 | 70 | TET2                              |
| 1077 | 2080 | 70 | TGFBR2                            |
| 1077 | 2080 | 70 | TMPRSS2                           |
| 1077 | 2080 | 70 | TNFAIP3                           |
| 1077 | 2080 | 70 | TNKS                              |
| 1077 | 2080 | 70 | TNKS2                             |
| 1077 | 2080 | 70 | TOP1                              |
| 1077 | 2080 | 70 | Tuberous sclerosis complex 1 gene |
| 1077 | 2080 | 70 | Tuberous sclerosis complex 2 gene |
| 1077 | 2080 | 70 | USP9X                             |

|      |      |    |                              |
|------|------|----|------------------------------|
| 1077 | 2080 | 70 | Von Hippel-Lindau            |
| 1077 | 2080 | 70 | WT1                          |
| 1077 |      | 70 | Fibroblast growth receptor 2 |
| 1077 |      | 70 | MYC                          |
| 1078 | 2081 | 70 | ABL1                         |
| 1078 | 2081 | 70 | ABL2                         |
| 1078 | 2081 | 70 | AKT1                         |
| 1078 | 2081 | 70 | AKT2                         |
| 1078 | 2081 | 70 | AKT3                         |
| 1078 | 2081 | 70 | ALK                          |
| 1078 | 2081 | 70 | APC                          |
| 1078 | 2081 | 70 | AR                           |
| 1078 | 2081 | 70 | ARAF                         |
| 1078 | 2081 | 70 | ARFRP1                       |
| 1078 | 2081 | 70 | ARID1A                       |
| 1078 | 2081 | 70 | ATM                          |
| 1078 | 2081 | 70 | ATR                          |
| 1078 | 2081 | 70 | AURKA                        |
| 1078 | 2081 | 70 | AURKB                        |
| 1078 | 2081 | 70 | BAP1                         |
| 1078 | 2081 | 70 | BCL-2                        |
| 1078 | 2081 | 70 | BCL2A1                       |
| 1078 | 2081 | 70 | BCL2L1                       |
| 1078 | 2081 | 70 | BCL2L2                       |
| 1078 | 2081 | 70 | BCL6                         |
| 1078 | 2081 | 70 | BCR                          |
| 1078 | 2081 | 70 | BRAF                         |
| 1078 | 2081 | 70 | BRCA1                        |
| 1078 | 2081 | 70 | BRCA2                        |
| 1078 | 2081 | 70 | CARD11                       |
| 1078 | 2081 | 70 | CBL                          |
| 1078 | 2081 | 70 | CCND1                        |
| 1078 | 2081 | 70 | CCND2                        |
| 1078 | 2081 | 70 | CCND3                        |
| 1078 | 2081 | 70 | CCNE1                        |
| 1078 | 2081 | 70 | CD79A                        |
| 1078 | 2081 | 70 | CD79B                        |
| 1078 | 2081 | 70 | CDH2                         |
| 1078 | 2081 | 70 | CDH20                        |
| 1078 | 2081 | 70 | CDH5                         |

|      |      |    |                                       |
|------|------|----|---------------------------------------|
| 1078 | 2081 | 70 | Cyclin dependent kinase-4             |
| 1078 | 2081 | 70 | CDK6                                  |
| 1078 | 2081 | 70 | CDK8                                  |
| 1078 | 2081 | 70 | CDKN2A                                |
| 1078 | 2081 | 70 | CDKN2B                                |
| 1078 | 2081 | 70 | CDKN2C                                |
| 1078 | 2081 | 70 | CCAT/enhancer binding protein (CEBPA) |
| 1078 | 2081 | 70 | CHEK1                                 |
| 1078 | 2081 | 70 | CHEK2                                 |
| 1078 | 2081 | 70 | CRKL                                  |
| 1078 | 2081 | 70 | CRLF2                                 |
| 1078 | 2081 | 70 | CTNNB1                                |
| 1078 | 2081 | 70 | DDR2                                  |
| 1078 | 2081 | 70 | DNMT3A                                |
| 1078 | 2081 | 70 | DOT1L                                 |
| 1078 | 2081 | 70 | Epidermal Growth Factor Receptor      |
| 1078 | 2081 | 70 | EPHA3                                 |
| 1078 | 2081 | 70 | EPHA5                                 |
| 1078 | 2081 | 70 | EPHA6                                 |
| 1078 | 2081 | 70 | EPHA7                                 |
| 1078 | 2081 | 70 | EPHB1                                 |
| 1078 | 2081 | 70 | EPHB4                                 |
| 1078 | 2081 | 70 | EPHB6                                 |
| 1078 | 2081 | 70 | ERBB2                                 |
| 1078 | 2081 | 70 | ERBB3                                 |
| 1078 | 2081 | 70 | ERBB4                                 |
| 1078 | 2081 | 70 | ERCC2                                 |
| 1078 | 2081 | 70 | ERG                                   |
| 1078 | 2081 | 70 | ETV1                                  |
| 1078 | 2081 | 70 | ETV4                                  |
| 1078 | 2081 | 70 | ETV5                                  |
| 1078 | 2081 | 70 | ETV6                                  |
| 1078 | 2081 | 70 | EWSR1                                 |
| 1078 | 2081 | 70 | EZH2                                  |
| 1078 | 2081 | 70 | FANCA                                 |
| 1078 | 2081 | 70 | FBXW7                                 |
| 1078 | 2081 | 70 | Fibroblast growth receptor 1          |
| 1078 | 2081 | 70 | Fibroblast growth receptor 2          |
| 1078 | 2081 | 70 | Fibroblast growth receptor 3          |

|      |      |    |                                   |
|------|------|----|-----------------------------------|
| 1078 | 2081 | 70 | Fibroblast growth receptor 4      |
| 1078 | 2081 | 70 | FLT1                              |
| 1078 | 2081 | 70 | Fms-like tyrosine kinase 3 (FLT3) |
| 1078 | 2081 | 70 | FLT4                              |
| 1078 | 2081 | 70 | FOXP4                             |
| 1078 | 2081 | 70 | GATA1                             |
| 1078 | 2081 | 70 | GNA11                             |
| 1078 | 2081 | 70 | GNAQ                              |
| 1078 | 2081 | 70 | GNAS                              |
| 1078 | 2081 | 70 | GPR124                            |
| 1078 | 2081 | 70 | GUCY1A2                           |
| 1078 | 2081 | 70 | HOXA3                             |
| 1078 | 2081 | 70 | HRAS                              |
| 1078 | 2081 | 70 | HSP90AA1                          |
| 1078 | 2081 | 70 | IDH1                              |
| 1078 | 2081 | 70 | IDH2                              |
| 1078 | 2081 | 70 | Insulin growth factor 1 receptor  |
| 1078 | 2081 | 70 | IGF2R                             |
| 1078 | 2081 | 70 | IKBKE                             |
| 1078 | 2081 | 70 | IKZF1                             |
| 1078 | 2081 | 70 | INHBA                             |
| 1078 | 2081 | 70 | INSR                              |
| 1078 | 2081 | 70 | IRS2                              |
| 1078 | 2081 | 70 | JAK1                              |
| 1078 | 2081 | 70 | JAK2                              |
| 1078 | 2081 | 70 | JAK3                              |
| 1078 | 2081 | 70 | JUN                               |
| 1078 | 2081 | 70 | KDM6A                             |
| 1078 | 2081 | 70 | KDR                               |
| 1078 | 2081 | 70 | KIT                               |
| 1078 | 2081 | 70 | KRAS                              |
| 1078 | 2081 | 70 | LRP1B                             |
| 1078 | 2081 | 70 | LRP6                              |
| 1078 | 2081 | 70 | LTK                               |
| 1078 | 2081 | 70 | MAP2K1                            |
| 1078 | 2081 | 70 | MAP2K2                            |
| 1078 | 2081 | 70 | MAP2K4                            |
| 1078 | 2081 | 70 | MCL1                              |
| 1078 | 2081 | 70 | MDM2                              |
| 1078 | 2081 | 70 | MDM4                              |



|      |      |    |                                                |
|------|------|----|------------------------------------------------|
| 1078 | 2081 | 70 | MEN1                                           |
| 1078 | 2081 | 70 | MET                                            |
| 1078 | 2081 | 70 | Microphthalmia associated transcription factor |
| 1078 | 2081 | 70 | MLH1                                           |
| 1078 | 2081 | 70 | MLL                                            |
| 1078 | 2081 | 70 | MPL                                            |
| 1078 | 2081 | 70 | MRE11A                                         |
| 1078 | 2081 | 70 | MSH2                                           |
| 1078 | 2081 | 70 | MSH6                                           |
| 1078 | 2081 | 70 | MTOR                                           |
| 1078 | 2081 | 70 | MUTYH                                          |
| 1078 | 2081 | 70 | MYC                                            |
| 1078 | 2081 | 70 | MYCL1                                          |
| 1078 | 2081 | 70 | MYCN                                           |
| 1078 | 2081 | 70 | NF1                                            |
| 1078 | 2081 | 70 | NF2                                            |
| 1078 | 2081 | 70 | NKX2-1                                         |
| 1078 | 2081 | 70 | NOTCH1                                         |
| 1078 | 2081 | 70 | Nucleophosmin (NPM1)                           |
| 1078 | 2081 | 70 | NRAS                                           |
| 1078 | 2081 | 70 | NTRK1                                          |
| 1078 | 2081 | 70 | NTRK2                                          |
| 1078 | 2081 | 70 | NTRK3                                          |
| 1078 | 2081 | 70 | PAK3                                           |
| 1078 | 2081 | 70 | PAX5                                           |
| 1078 | 2081 | 70 | PDGFRA                                         |
| 1078 | 2081 | 70 | PDGFRB                                         |
| 1078 | 2081 | 70 | PHLPP2                                         |
| 1078 | 2081 | 70 | PIK3CG                                         |
| 1078 | 2081 | 70 | PIK3R1                                         |
| 1078 | 2081 | 70 | PKHD1                                          |
| 1078 | 2081 | 70 | PLCG1                                          |
| 1078 | 2081 | 70 | PRKDC                                          |
| 1078 | 2081 | 70 | PTCH1                                          |
| 1078 | 2081 | 70 | PTCH2                                          |
| 1078 | 2081 | 70 | Phosphatase and Tensin homolog                 |
| 1078 | 2081 | 70 | PTPN11                                         |
| 1078 | 2081 | 70 | PTPRD                                          |
| 1078 | 2081 | 70 | RAF1                                           |
| 1078 | 2081 | 70 | RARA                                           |

|      |      |    |                                   |
|------|------|----|-----------------------------------|
| 1078 | 2081 | 70 | RET                               |
| 1078 | 2081 | 70 | RICTOR                            |
| 1078 | 2081 | 70 | RPTOR                             |
| 1078 | 2081 | 70 | SMAD2                             |
| 1078 | 2081 | 70 | SMAD3                             |
| 1078 | 2081 | 70 | SMAD4                             |
| 1078 | 2081 | 70 | SMARCA4                           |
| 1078 | 2081 | 70 | SMARCB1                           |
| 1078 | 2081 | 70 | SMO                               |
| 1078 | 2081 | 70 | SOX10                             |
| 1078 | 2081 | 70 | SOX2                              |
| 1078 | 2081 | 70 | SRC                               |
| 1078 | 2081 | 70 | STAT3                             |
| 1078 | 2081 | 70 | STK11                             |
| 1078 | 2081 | 70 | SUFU                              |
| 1078 | 2081 | 70 | TBX22                             |
| 1078 | 2081 | 70 | TET2                              |
| 1078 | 2081 | 70 | TGFBR2                            |
| 1078 | 2081 | 70 | TMPRSS2                           |
| 1078 | 2081 | 70 | TNFAIP3                           |
| 1078 | 2081 | 70 | TNKS                              |
| 1078 | 2081 | 70 | TNKS2                             |
| 1078 | 2081 | 70 | TOP1                              |
| 1078 | 2081 | 70 | Tuberous sclerosis complex 1 gene |
| 1078 | 2081 | 70 | Tuberous sclerosis complex 2 gene |
| 1078 | 2081 | 70 | USP9X                             |
| 1078 | 2081 | 70 | Von Hippel-Lindau                 |
| 1078 | 2081 | 70 | WT1                               |
| 1079 | 2082 | 20 | ABL1                              |
| 1079 | 2082 | 20 | AKT1                              |
| 1079 | 2082 | 20 | AKT2                              |
| 1079 | 2082 | 20 | AKT3                              |
| 1079 | 2082 | 20 | ALK                               |
| 1079 | 2082 | 20 | ALOX12B                           |
| 1079 | 2082 | 20 | APC                               |
| 1079 | 2082 | 20 | APCDD1                            |
| 1079 | 2082 | 20 | AR                                |
| 1079 | 2082 | 20 | ARAF                              |
| 1079 | 2082 | 20 | ARFRP1                            |

|      |      |    |                           |
|------|------|----|---------------------------|
| 1079 | 2082 | 20 | ARID1A                    |
| 1079 | 2082 | 20 | ARID2                     |
| 1079 | 2082 | 20 | ASXL1                     |
| 1079 | 2082 | 20 | ATM                       |
| 1079 | 2082 | 20 | ATR                       |
| 1079 | 2082 | 20 | ATRX                      |
| 1079 | 2082 | 20 | AURKA                     |
| 1079 | 2082 | 20 | AURKB                     |
| 1079 | 2082 | 20 | AXL                       |
| 1079 | 2082 | 20 | BACH1                     |
| 1079 | 2082 | 20 | BAP1                      |
| 1079 | 2082 | 20 | BARD1                     |
| 1079 | 2082 | 20 | BCL-2                     |
| 1079 | 2082 | 20 | BCL2L2                    |
| 1079 | 2082 | 20 | BCL6                      |
| 1079 | 2082 | 20 | BCOR                      |
| 1079 | 2082 | 20 | BCORL1                    |
| 1079 | 2082 | 20 | BCR                       |
| 1079 | 2082 | 20 | BLM                       |
| 1079 | 2082 | 20 | BRAF                      |
| 1079 | 2082 | 20 | BRCA1                     |
| 1079 | 2082 | 20 | BRCA2                     |
| 1079 | 2082 | 20 | BRIP1                     |
| 1079 | 2082 | 20 | BTG1                      |
| 1079 | 2082 | 20 | BTK                       |
| 1079 | 2082 | 20 | C17orf39                  |
| 1079 | 2082 | 20 | CARD11                    |
| 1079 | 2082 | 20 | CASP8                     |
| 1079 | 2082 | 20 | CBFB                      |
| 1079 | 2082 | 20 | CBL                       |
| 1079 | 2082 | 20 | CCND2                     |
| 1079 | 2082 | 20 | CCND3                     |
| 1079 | 2082 | 20 | CCNE1                     |
| 1079 | 2082 | 20 | CD79A                     |
| 1079 | 2082 | 20 | CD79B                     |
| 1079 | 2082 | 20 | CDC73                     |
| 1079 | 2082 | 20 | CDH1                      |
| 1079 | 2082 | 20 | CDK12                     |
| 1079 | 2082 | 20 | Cyclin dependent kinase-4 |
| 1079 | 2082 | 20 | CDK6                      |

|      |      |    |                                       |
|------|------|----|---------------------------------------|
| 1079 | 2082 | 20 | CDK8                                  |
| 1079 | 2082 | 20 | CDKN1B                                |
| 1079 | 2082 | 20 | CDKN2A                                |
| 1079 | 2082 | 20 | CDKN2B                                |
| 1079 | 2082 | 20 | CDKN2C                                |
| 1079 | 2082 | 20 | CCAT/enhancer binding protein (CEBPA) |
| 1079 | 2082 | 20 | CHEK1                                 |
| 1079 | 2082 | 20 | CHEK2                                 |
| 1079 | 2082 | 20 | CHUK                                  |
| 1079 | 2082 | 20 | CIC                                   |
| 1079 | 2082 | 20 | CRBN                                  |
| 1079 | 2082 | 20 | CREBBP                                |
| 1079 | 2082 | 20 | CRKL                                  |
| 1079 | 2082 | 20 | CRLF2                                 |
| 1079 | 2082 | 20 | CSF1R                                 |
| 1079 | 2082 | 20 | CTCF                                  |
| 1079 | 2082 | 20 | CTNNA1                                |
| 1079 | 2082 | 20 | CTNNB1                                |
| 1079 | 2082 | 20 | CUL4A                                 |
| 1079 | 2082 | 20 | CUL4B                                 |
| 1079 | 2082 | 20 | CYP17A1                               |
| 1079 | 2082 | 20 | DAXX                                  |
| 1079 | 2082 | 20 | DDR2                                  |
| 1079 | 2082 | 20 | DIS3                                  |
| 1079 | 2082 | 20 | DNMT3A                                |
| 1079 | 2082 | 20 | DOT1L                                 |
| 1079 | 2082 | 20 | Epidermal Growth Factor Receptor      |
| 1079 | 2082 | 20 | EMSY                                  |
| 1079 | 2082 | 20 | EP300                                 |
| 1079 | 2082 | 20 | EPHA3                                 |
| 1079 | 2082 | 20 | EPHA5                                 |
| 1079 | 2082 | 20 | EPHB1                                 |
| 1079 | 2082 | 20 | ERBB2                                 |
| 1079 | 2082 | 20 | ERBB3                                 |
| 1079 | 2082 | 20 | ERBB4                                 |
| 1079 | 2082 | 20 | ERG                                   |
| 1079 | 2082 | 20 | Estrogen receptor 1                   |
| 1079 | 2082 | 20 | ETV1                                  |
| 1079 | 2082 | 20 | ETV4                                  |

|      |      |    |                                   |
|------|------|----|-----------------------------------|
| 1079 | 2082 | 20 | ETV5                              |
| 1079 | 2082 | 20 | ETV6                              |
| 1079 | 2082 | 20 | EWSR1                             |
| 1079 | 2082 | 20 | EZH2                              |
| 1079 | 2082 | 20 | FAM123B(WTX)                      |
| 1079 | 2082 | 20 | FAM46C                            |
| 1079 | 2082 | 20 | FANCA                             |
| 1079 | 2082 | 20 | FANCC                             |
| 1079 | 2082 | 20 | FANCD2                            |
| 1079 | 2082 | 20 | FANCE                             |
| 1079 | 2082 | 20 | FANCF                             |
| 1079 | 2082 | 20 | FANCG                             |
| 1079 | 2082 | 20 | FANCI                             |
| 1079 | 2082 | 20 | FANCL                             |
| 1079 | 2082 | 20 | FANCM                             |
| 1079 | 2082 | 20 | FAT3                              |
| 1079 | 2082 | 20 | FBXW7                             |
| 1079 | 2082 | 20 | FGF10                             |
| 1079 | 2082 | 20 | FGF12                             |
| 1079 | 2082 | 20 | FGF14                             |
| 1079 | 2082 | 20 | Fibroblast growth factor 23       |
| 1079 | 2082 | 20 | FGF6                              |
| 1079 | 2082 | 20 | FGF7                              |
| 1079 | 2082 | 20 | Fibroblast growth receptor 2      |
| 1079 | 2082 | 20 | Fibroblast growth receptor 3      |
| 1079 | 2082 | 20 | Fibroblast growth receptor 4      |
| 1079 | 2082 | 20 | FLT1                              |
| 1079 | 2082 | 20 | Fms-like tyrosine kinase 3 (FLT3) |
| 1079 | 2082 | 20 | FLT4                              |
| 1079 | 2082 | 20 | FOXL2                             |
| 1079 | 2082 | 20 | GATA1                             |
| 1079 | 2082 | 20 | GATA2                             |
| 1079 | 2082 | 20 | GNA11                             |
| 1079 | 2082 | 20 | GNA13                             |
| 1079 | 2082 | 20 | GNAQ                              |
| 1079 | 2082 | 20 | GNAS                              |
| 1079 | 2082 | 20 | GPR124                            |
| 1079 | 2082 | 20 | GRIN2A                            |
| 1079 | 2082 | 20 | GSK3B                             |
| 1079 | 2082 | 20 | Hepatocyte growth factor          |

|      |      |    |                                                  |
|------|------|----|--------------------------------------------------|
| 1079 | 2082 | 20 | HLA-A                                            |
| 1079 | 2082 | 20 | HRAS                                             |
| 1079 | 2082 | 20 | IDH1                                             |
| 1079 | 2082 | 20 | IDH2                                             |
| 1079 | 2082 | 20 | Insulin-like growth factor 1                     |
| 1079 | 2082 | 20 | Insulin growth factor 1 receptor                 |
| 1079 | 2082 | 20 | Insulin-like growth factor 2, also somatomedin A |
| 1079 | 2082 | 20 | IKBKE                                            |
| 1079 | 2082 | 20 | IKZF1                                            |
| 1079 | 2082 | 20 | IL7R                                             |
| 1079 | 2082 | 20 | INHBA                                            |
| 1079 | 2082 | 20 | IRF4                                             |
| 1079 | 2082 | 20 | IRS2                                             |
| 1079 | 2082 | 20 | JAK1                                             |
| 1079 | 2082 | 20 | JAK2                                             |
| 1079 | 2082 | 20 | JAK3                                             |
| 1079 | 2082 | 20 | JUN                                              |
| 1079 | 2082 | 20 | KDM5A                                            |
| 1079 | 2082 | 20 | KDM5C                                            |
| 1079 | 2082 | 20 | KDM6A                                            |
| 1079 | 2082 | 20 | KDR                                              |
| 1079 | 2082 | 20 | KEAP1                                            |
| 1079 | 2082 | 20 | KIT                                              |
| 1079 | 2082 | 20 | KLHL6                                            |
| 1079 | 2082 | 20 | KRAS                                             |
| 1079 | 2082 | 20 | LMO1                                             |
| 1079 | 2082 | 20 | LRP1B                                            |
| 1079 | 2082 | 20 | MAP2K1                                           |
| 1079 | 2082 | 20 | MAP2K2                                           |
| 1079 | 2082 | 20 | MAP2K4                                           |
| 1079 | 2082 | 20 | MAP3K1                                           |
| 1079 | 2082 | 20 | MAP3K13                                          |
| 1079 | 2082 | 20 | MCL1                                             |
| 1079 | 2082 | 20 | MDM2                                             |
| 1079 | 2082 | 20 | MDM4                                             |
| 1079 | 2082 | 20 | MED12                                            |
| 1079 | 2082 | 20 | MEF2B                                            |
| 1079 | 2082 | 20 | MEN1                                             |
| 1079 | 2082 | 20 | MET                                              |

|      |      |    |                                                |
|------|------|----|------------------------------------------------|
| 1079 | 2082 | 20 | Microphthalmia associated transcription factor |
| 1079 | 2082 | 20 | MLH1                                           |
| 1079 | 2082 | 20 | MLL                                            |
| 1079 | 2082 | 20 | MLL2                                           |
| 1079 | 2082 | 20 | MPL                                            |
| 1079 | 2082 | 20 | MRE11A                                         |
| 1079 | 2082 | 20 | MSH2                                           |
| 1079 | 2082 | 20 | MSH6                                           |
| 1079 | 2082 | 20 | MTOR                                           |
| 1079 | 2082 | 20 | MUTYH                                          |
| 1079 | 2082 | 20 | MYC                                            |
| 1079 | 2082 | 20 | MYCL1                                          |
| 1079 | 2082 | 20 | MYCN                                           |
| 1079 | 2082 | 20 | MYD88                                          |
| 1079 | 2082 | 20 | NBN                                            |
| 1079 | 2082 | 20 | NCOR1                                          |
| 1079 | 2082 | 20 | NF1                                            |
| 1079 | 2082 | 20 | NF2                                            |
| 1079 | 2082 | 20 | NFE2L2                                         |
| 1079 | 2082 | 20 | NFKBIA                                         |
| 1079 | 2082 | 20 | NKX2-1                                         |
| 1079 | 2082 | 20 | NOTCH1                                         |
| 1079 | 2082 | 20 | NOTCH2                                         |
| 1079 | 2082 | 20 | NOTCH3                                         |
| 1079 | 2082 | 20 | NOTCH4                                         |
| 1079 | 2082 | 20 | Nucleophosmin (NPM1)                           |
| 1079 | 2082 | 20 | NRAS                                           |
| 1079 | 2082 | 20 | NSD1                                           |
| 1079 | 2082 | 20 | NTRK1                                          |
| 1079 | 2082 | 20 | NTRK2                                          |
| 1079 | 2082 | 20 | NTRK3                                          |
| 1079 | 2082 | 20 | NUP93                                          |
| 1079 | 2082 | 20 | PAK3                                           |
| 1079 | 2082 | 20 | PAK7                                           |
| 1079 | 2082 | 20 | PALB2                                          |
| 1079 | 2082 | 20 | PARP1                                          |
| 1079 | 2082 | 20 | PARP2                                          |
| 1079 | 2082 | 20 | PARP3                                          |
| 1079 | 2082 | 20 | PARP4                                          |
| 1079 | 2082 | 20 | PAX5                                           |

|      |      |    |                                |
|------|------|----|--------------------------------|
| 1079 | 2082 | 20 | PBRM1                          |
| 1079 | 2082 | 20 | PDGFRA                         |
| 1079 | 2082 | 20 | PDGFRB                         |
| 1079 | 2082 | 20 | PKD1                           |
| 1079 | 2082 | 20 | PIK3C2G                        |
| 1079 | 2082 | 20 | PIK3C3                         |
| 1079 | 2082 | 20 | <i>PIK3CA</i>                  |
| 1079 | 2082 | 20 | PIK3CG                         |
| 1079 | 2082 | 20 | PIK3R1                         |
| 1079 | 2082 | 20 | PIK3R2                         |
| 1079 | 2082 | 20 | PMS2                           |
| 1079 | 2082 | 20 | PNRC1                          |
| 1079 | 2082 | 20 | PPP2R1A                        |
| 1079 | 2082 | 20 | PRDM1                          |
| 1079 | 2082 | 20 | PRKAR1A                        |
| 1079 | 2082 | 20 | PRKDC                          |
| 1079 | 2082 | 20 | PRSS8                          |
| 1079 | 2082 | 20 | PTCH1                          |
| 1079 | 2082 | 20 | Phosphatase and Tensin homolog |
| 1079 | 2082 | 20 | PTPN11                         |
| 1079 | 2082 | 20 | RAD50                          |
| 1079 | 2082 | 20 | RAD51                          |
| 1079 | 2082 | 20 | RAD51B                         |
| 1079 | 2082 | 20 | RAD51C                         |
| 1079 | 2082 | 20 | RAD51D                         |
| 1079 | 2082 | 20 | RAD52                          |
| 1079 | 2082 | 20 | RAD54L                         |
| 1079 | 2082 | 20 | RAF1                           |
| 1079 | 2082 | 20 | RARA                           |
| 1079 | 2082 | 20 | 13q14(RB1)V                    |
| 1079 | 2082 | 20 | REL                            |
| 1079 | 2082 | 20 | RET                            |
| 1079 | 2082 | 20 | RICTOR                         |
| 1079 | 2082 | 20 | RNF43                          |
| 1079 | 2082 | 20 | ROS1                           |
| 1079 | 2082 | 20 | RPA1                           |
| 1079 | 2082 | 20 | RPTOR                          |
| 1079 | 2082 | 20 | RUNX1                          |
| 1079 | 2082 | 20 | RUNX1T1                        |
| 1079 | 2082 | 20 | SETD2                          |



|      |      |    |                                   |
|------|------|----|-----------------------------------|
| 1079 | 2082 | 20 | SF3B1                             |
| 1079 | 2082 | 20 | SH2B3                             |
| 1079 | 2082 | 20 | SMAD2                             |
| 1079 | 2082 | 20 | SMAD4                             |
| 1079 | 2082 | 20 | SMARCA4                           |
| 1079 | 2082 | 20 | SMARCB1                           |
| 1079 | 2082 | 20 | SMARCD1                           |
| 1079 | 2082 | 20 | SMO                               |
| 1079 | 2082 | 20 | SOCS1                             |
| 1079 | 2082 | 20 | SOX10                             |
| 1079 | 2082 | 20 | SOX2                              |
| 1079 | 2082 | 20 | SPEN                              |
| 1079 | 2082 | 20 | SPOP                              |
| 1079 | 2082 | 20 | SRC                               |
| 1079 | 2082 | 20 | STAG2                             |
| 1079 | 2082 | 20 | STAT4                             |
| 1079 | 2082 | 20 | STK11                             |
| 1079 | 2082 | 20 | SUFU                              |
| 1079 | 2082 | 20 | SYK                               |
| 1079 | 2082 | 20 | TBX3                              |
| 1079 | 2082 | 20 | TET2                              |
| 1079 | 2082 | 20 | TGFBR2                            |
| 1079 | 2082 | 20 | TIPARP                            |
| 1079 | 2082 | 20 | TMPRSS2                           |
| 1079 | 2082 | 20 | TNFAIP3                           |
| 1079 | 2082 | 20 | TNFRSF14                          |
| 1079 | 2082 | 20 | TOP1                              |
| 1079 | 2082 | 20 | TP53                              |
| 1079 | 2082 | 20 | TRRAP                             |
| 1079 | 2082 | 20 | Tuberous sclerosis complex 1 gene |
| 1079 | 2082 | 20 | Tuberous sclerosis complex 2 gene |
| 1079 | 2082 | 20 | TSHR                              |
| 1079 | 2082 | 20 | Von Hippel-Lindau                 |
| 1079 | 2082 | 20 | WISP3                             |
| 1079 | 2082 | 20 | WT1                               |
| 1079 | 2082 | 20 | XPO1                              |
| 1079 | 2082 | 20 | XRCC3                             |
| 1079 | 2082 | 20 | ZNF217                            |
| 1080 | 2083 | 40 | ABL1                              |

|      |      |    |          |
|------|------|----|----------|
| 1080 | 2083 | 40 | AKT2     |
| 1080 | 2083 | 40 | AKT3     |
| 1080 | 2083 | 40 | ALK      |
| 1080 | 2083 | 40 | ALOX12B  |
| 1080 | 2083 | 40 | APC      |
| 1080 | 2083 | 40 | APCDD1   |
| 1080 | 2083 | 40 | AR       |
| 1080 | 2083 | 40 | ARAF     |
| 1080 | 2083 | 40 | ARFRP1   |
| 1080 | 2083 | 40 | ARID1A   |
| 1080 | 2083 | 40 | ARID2    |
| 1080 | 2083 | 40 | ASXL1    |
| 1080 | 2083 | 40 | ATM      |
| 1080 | 2083 | 40 | ATR      |
| 1080 | 2083 | 40 | AURKA    |
| 1080 | 2083 | 40 | AURKB    |
| 1080 | 2083 | 40 | AXL      |
| 1080 | 2083 | 40 | BACH1    |
| 1080 | 2083 | 40 | BAP1     |
| 1080 | 2083 | 40 | BARD1    |
| 1080 | 2083 | 40 | BCL-2    |
| 1080 | 2083 | 40 | BCL2L2   |
| 1080 | 2083 | 40 | BCL6     |
| 1080 | 2083 | 40 | BCOR     |
| 1080 | 2083 | 40 | BCORL1   |
| 1080 | 2083 | 40 | BCR      |
| 1080 | 2083 | 40 | BLM      |
| 1080 | 2083 | 40 | BRAF     |
| 1080 | 2083 | 40 | BRCA1    |
| 1080 | 2083 | 40 | BRCA2    |
| 1080 | 2083 | 40 | BRIP1    |
| 1080 | 2083 | 40 | BTG1     |
| 1080 | 2083 | 40 | BTK      |
| 1080 | 2083 | 40 | C17orf39 |
| 1080 | 2083 | 40 | CARD11   |
| 1080 | 2083 | 40 | CASP8    |
| 1080 | 2083 | 40 | CBFB     |
| 1080 | 2083 | 40 | CBL      |
| 1080 | 2083 | 40 | CCND1    |
| 1080 | 2083 | 40 | CCND2    |

|      |      |    |                                       |
|------|------|----|---------------------------------------|
| 1080 | 2083 | 40 | CCND3                                 |
| 1080 | 2083 | 40 | CCNE1                                 |
| 1080 | 2083 | 40 | CD79A                                 |
| 1080 | 2083 | 40 | CD79B                                 |
| 1080 | 2083 | 40 | CDC73                                 |
| 1080 | 2083 | 40 | CDH1                                  |
| 1080 | 2083 | 40 | CDK12                                 |
| 1080 | 2083 | 40 | Cyclin dependent kinase-4             |
| 1080 | 2083 | 40 | CDK6                                  |
| 1080 | 2083 | 40 | CDK8                                  |
| 1080 | 2083 | 40 | CDKN1B                                |
| 1080 | 2083 | 40 | CDKN2A                                |
| 1080 | 2083 | 40 | CDKN2B                                |
| 1080 | 2083 | 40 | CDKN2C                                |
| 1080 | 2083 | 40 | CCAT/enhancer binding protein (CEBPA) |
| 1080 | 2083 | 40 | CHEK1                                 |
| 1080 | 2083 | 40 | CHEK2                                 |
| 1080 | 2083 | 40 | CHUK                                  |
| 1080 | 2083 | 40 | CIC                                   |
| 1080 | 2083 | 40 | CRBN                                  |
| 1080 | 2083 | 40 | CREBBP                                |
| 1080 | 2083 | 40 | CRKL                                  |
| 1080 | 2083 | 40 | CRLF2                                 |
| 1080 | 2083 | 40 | CSF1R                                 |
| 1080 | 2083 | 40 | CTCF                                  |
| 1080 | 2083 | 40 | CTNNA1                                |
| 1080 | 2083 | 40 | CTNNB1                                |
| 1080 | 2083 | 40 | CUL4A                                 |
| 1080 | 2083 | 40 | CUL4B                                 |
| 1080 | 2083 | 40 | CYP17A1                               |
| 1080 | 2083 | 40 | DAXX                                  |
| 1080 | 2083 | 40 | DDR2                                  |
| 1080 | 2083 | 40 | DIS3                                  |
| 1080 | 2083 | 40 | DNMT3A                                |
| 1080 | 2083 | 40 | DOT1L                                 |
| 1080 | 2083 | 40 | Epidermal Growth Factor Receptor      |
| 1080 | 2083 | 40 | EMSY                                  |
| 1080 | 2083 | 40 | EP300                                 |
| 1080 | 2083 | 40 | EPHA3                                 |

|      |      |    |                                   |
|------|------|----|-----------------------------------|
| 1080 | 2083 | 40 | EPHA5                             |
| 1080 | 2083 | 40 | EPHB1                             |
| 1080 | 2083 | 40 | ERBB2                             |
| 1080 | 2083 | 40 | ERBB3                             |
| 1080 | 2083 | 40 | ERBB4                             |
| 1080 | 2083 | 40 | ERG                               |
| 1080 | 2083 | 40 | ETV1                              |
| 1080 | 2083 | 40 | ETV4                              |
| 1080 | 2083 | 40 | ETV5                              |
| 1080 | 2083 | 40 | ETV6                              |
| 1080 | 2083 | 40 | EWSR1                             |
| 1080 | 2083 | 40 | EZH2                              |
| 1080 | 2083 | 40 | FAM123B(WTX)                      |
| 1080 | 2083 | 40 | FAM46C                            |
| 1080 | 2083 | 40 | FANCA                             |
| 1080 | 2083 | 40 | FANCC                             |
| 1080 | 2083 | 40 | FANCD2                            |
| 1080 | 2083 | 40 | FANCE                             |
| 1080 | 2083 | 40 | FANCF                             |
| 1080 | 2083 | 40 | FANCG                             |
| 1080 | 2083 | 40 | FANCI                             |
| 1080 | 2083 | 40 | FANCL                             |
| 1080 | 2083 | 40 | FANCM                             |
| 1080 | 2083 | 40 | FAT3                              |
| 1080 | 2083 | 40 | FBXW7                             |
| 1080 | 2083 | 40 | FGF10                             |
| 1080 | 2083 | 40 | FGF12                             |
| 1080 | 2083 | 40 | FGF14                             |
| 1080 | 2083 | 40 | Fibroblast growth factor 19       |
| 1080 | 2083 | 40 | Fibroblast growth factor 23       |
| 1080 | 2083 | 40 | Fibroblast growth factor 3        |
| 1080 | 2083 | 40 | FGF4                              |
| 1080 | 2083 | 40 | FGF6                              |
| 1080 | 2083 | 40 | FGF7                              |
| 1080 | 2083 | 40 | Fibroblast growth receptor 2      |
| 1080 | 2083 | 40 | Fibroblast growth receptor 3      |
| 1080 | 2083 | 40 | Fibroblast growth receptor 4      |
| 1080 | 2083 | 40 | FLT1                              |
| 1080 | 2083 | 40 | Fms-like tyrosine kinase 3 (FLT3) |
| 1080 | 2083 | 40 | FLT4                              |

|      |      |    |                                                  |
|------|------|----|--------------------------------------------------|
| 1080 | 2083 | 40 | FOXL2                                            |
| 1080 | 2083 | 40 | GATA1                                            |
| 1080 | 2083 | 40 | GATA2                                            |
| 1080 | 2083 | 40 | GATA3                                            |
| 1080 | 2083 | 40 | GNA11                                            |
| 1080 | 2083 | 40 | GNA13                                            |
| 1080 | 2083 | 40 | GNAQ                                             |
| 1080 | 2083 | 40 | GNAS                                             |
| 1080 | 2083 | 40 | GPR124                                           |
| 1080 | 2083 | 40 | GRIN2A                                           |
| 1080 | 2083 | 40 | GSK3B                                            |
| 1080 | 2083 | 40 | Hepatocyte growth factor                         |
| 1080 | 2083 | 40 | HLA-A                                            |
| 1080 | 2083 | 40 | HRAS                                             |
| 1080 | 2083 | 40 | IDH1                                             |
| 1080 | 2083 | 40 | IDH2                                             |
| 1080 | 2083 | 40 | Insulin-like growth factor 1                     |
| 1080 | 2083 | 40 | Insulin growth factor 1 receptor                 |
| 1080 | 2083 | 40 | Insulin-like growth factor 2, also somatomedin A |
| 1080 | 2083 | 40 | IKBKE                                            |
| 1080 | 2083 | 40 | IKZF1                                            |
| 1080 | 2083 | 40 | IL7R                                             |
| 1080 | 2083 | 40 | INHBA                                            |
| 1080 | 2083 | 40 | IRF4                                             |
| 1080 | 2083 | 40 | IRS2                                             |
| 1080 | 2083 | 40 | JAK1                                             |
| 1080 | 2083 | 40 | JAK2                                             |
| 1080 | 2083 | 40 | JAK3                                             |
| 1080 | 2083 | 40 | JUN                                              |
| 1080 | 2083 | 40 | KDM5A                                            |
| 1080 | 2083 | 40 | KDM5C                                            |
| 1080 | 2083 | 40 | KDM6A                                            |
| 1080 | 2083 | 40 | KDR                                              |
| 1080 | 2083 | 40 | KEAP1                                            |
| 1080 | 2083 | 40 | KIT                                              |
| 1080 | 2083 | 40 | KLHL6                                            |
| 1080 | 2083 | 40 | KRAS                                             |
| 1080 | 2083 | 40 | LMO1                                             |
| 1080 | 2083 | 40 | LRP1B                                            |
| 1080 | 2083 | 40 | MAP2K1                                           |

|      |      |    |                                                |
|------|------|----|------------------------------------------------|
| 1080 | 2083 | 40 | MAP2K2                                         |
| 1080 | 2083 | 40 | MAP2K4                                         |
| 1080 | 2083 | 40 | MAP3K1                                         |
| 1080 | 2083 | 40 | MAP3K13                                        |
| 1080 | 2083 | 40 | MCL1                                           |
| 1080 | 2083 | 40 | MDM2                                           |
| 1080 | 2083 | 40 | MDM4                                           |
| 1080 | 2083 | 40 | MED12                                          |
| 1080 | 2083 | 40 | MEF2B                                          |
| 1080 | 2083 | 40 | MEN1                                           |
| 1080 | 2083 | 40 | MET                                            |
| 1080 | 2083 | 40 | Microphthalmia associated transcription factor |
| 1080 | 2083 | 40 | MLH1                                           |
| 1080 | 2083 | 40 | MLL                                            |
| 1080 | 2083 | 40 | MLL2                                           |
| 1080 | 2083 | 40 | MPL                                            |
| 1080 | 2083 | 40 | MRE11A                                         |
| 1080 | 2083 | 40 | MSH2                                           |
| 1080 | 2083 | 40 | MSH6                                           |
| 1080 | 2083 | 40 | MTOR                                           |
| 1080 | 2083 | 40 | MUTYH                                          |
| 1080 | 2083 | 40 | MYCL1                                          |
| 1080 | 2083 | 40 | MYCN                                           |
| 1080 | 2083 | 40 | MYD88                                          |
| 1080 | 2083 | 40 | MYST3                                          |
| 1080 | 2083 | 40 | NBN                                            |
| 1080 | 2083 | 40 | NCOR1                                          |
| 1080 | 2083 | 40 | NF1                                            |
| 1080 | 2083 | 40 | NF2                                            |
| 1080 | 2083 | 40 | NFE2L2                                         |
| 1080 | 2083 | 40 | NFKBIA                                         |
| 1080 | 2083 | 40 | NKX2-1                                         |
| 1080 | 2083 | 40 | NOTCH1                                         |
| 1080 | 2083 | 40 | NOTCH2                                         |
| 1080 | 2083 | 40 | NOTCH3                                         |
| 1080 | 2083 | 40 | NOTCH4                                         |
| 1080 | 2083 | 40 | Nucleophosmin (NPM1)                           |
| 1080 | 2083 | 40 | NRAS                                           |
| 1080 | 2083 | 40 | NSD1                                           |
| 1080 | 2083 | 40 | NTRK1                                          |

|      |      |    |                                |
|------|------|----|--------------------------------|
| 1080 | 2083 | 40 | NTRK2                          |
| 1080 | 2083 | 40 | NTRK3                          |
| 1080 | 2083 | 40 | NUP93                          |
| 1080 | 2083 | 40 | PAK3                           |
| 1080 | 2083 | 40 | PAK7                           |
| 1080 | 2083 | 40 | PALB2                          |
| 1080 | 2083 | 40 | PARP1                          |
| 1080 | 2083 | 40 | PARP2                          |
| 1080 | 2083 | 40 | PARP3                          |
| 1080 | 2083 | 40 | PARP4                          |
| 1080 | 2083 | 40 | PAX5                           |
| 1080 | 2083 | 40 | PBRM1                          |
| 1080 | 2083 | 40 | PDGFRA                         |
| 1080 | 2083 | 40 | PDGFRB                         |
| 1080 | 2083 | 40 | PDK1                           |
| 1080 | 2083 | 40 | PIK3C2G                        |
| 1080 | 2083 | 40 | PIK3C3                         |
| 1080 | 2083 | 40 | <i>PIK3CA</i>                  |
| 1080 | 2083 | 40 | PIK3CG                         |
| 1080 | 2083 | 40 | PIK3R1                         |
| 1080 | 2083 | 40 | PIK3R2                         |
| 1080 | 2083 | 40 | PMS2                           |
| 1080 | 2083 | 40 | PNRC1                          |
| 1080 | 2083 | 40 | PPP2R1A                        |
| 1080 | 2083 | 40 | PRDM1                          |
| 1080 | 2083 | 40 | PRKAR1A                        |
| 1080 | 2083 | 40 | PRKDC                          |
| 1080 | 2083 | 40 | PRSS8                          |
| 1080 | 2083 | 40 | PTCH1                          |
| 1080 | 2083 | 40 | Phosphatase and Tensin homolog |
| 1080 | 2083 | 40 | PTPN11                         |
| 1080 | 2083 | 40 | RAD50                          |
| 1080 | 2083 | 40 | RAD51                          |
| 1080 | 2083 | 40 | RAD51B                         |
| 1080 | 2083 | 40 | RAD51C                         |
| 1080 | 2083 | 40 | RAD51D                         |
| 1080 | 2083 | 40 | RAD52                          |
| 1080 | 2083 | 40 | RAD54L                         |
| 1080 | 2083 | 40 | RAF1                           |
| 1080 | 2083 | 40 | RARA                           |

|      |      |    |                                   |
|------|------|----|-----------------------------------|
| 1080 | 2083 | 40 | 13q14(RB1)V                       |
| 1080 | 2083 | 40 | REL                               |
| 1080 | 2083 | 40 | RET                               |
| 1080 | 2083 | 40 | RICTOR                            |
| 1080 | 2083 | 40 | RNF43                             |
| 1080 | 2083 | 40 | ROS1                              |
| 1080 | 2083 | 40 | RPA1                              |
| 1080 | 2083 | 40 | RPTOR                             |
| 1080 | 2083 | 40 | RUNX1                             |
| 1080 | 2083 | 40 | RUNX1T1                           |
| 1080 | 2083 | 40 | SETD2                             |
| 1080 | 2083 | 40 | SF3B1                             |
| 1080 | 2083 | 40 | SH2B3                             |
| 1080 | 2083 | 40 | SMAD2                             |
| 1080 | 2083 | 40 | SMAD4                             |
| 1080 | 2083 | 40 | SMARCA4                           |
| 1080 | 2083 | 40 | SMARCB1                           |
| 1080 | 2083 | 40 | SMARCD1                           |
| 1080 | 2083 | 40 | SMO                               |
| 1080 | 2083 | 40 | SOCS1                             |
| 1080 | 2083 | 40 | SOX10                             |
| 1080 | 2083 | 40 | SOX2                              |
| 1080 | 2083 | 40 | SPEN                              |
| 1080 | 2083 | 40 | SPOP                              |
| 1080 | 2083 | 40 | SRC                               |
| 1080 | 2083 | 40 | STAG2                             |
| 1080 | 2083 | 40 | STAT4                             |
| 1080 | 2083 | 40 | STK11                             |
| 1080 | 2083 | 40 | SUFU                              |
| 1080 | 2083 | 40 | SYK                               |
| 1080 | 2083 | 40 | TBX3                              |
| 1080 | 2083 | 40 | TET2                              |
| 1080 | 2083 | 40 | TGFBR2                            |
| 1080 | 2083 | 40 | TIPARP                            |
| 1080 | 2083 | 40 | TMPRSS2                           |
| 1080 | 2083 | 40 | TNFAIP3                           |
| 1080 | 2083 | 40 | TNFRSF14                          |
| 1080 | 2083 | 40 | TOP1                              |
| 1080 | 2083 | 40 | TRRAP                             |
| 1080 | 2083 | 40 | Tuberous sclerosis complex 1 gene |



|      |      |    |                                   |
|------|------|----|-----------------------------------|
| 1080 | 2083 | 40 | Tuberous sclerosis complex 2 gene |
| 1080 | 2083 | 40 | TSHR                              |
| 1080 | 2083 | 40 | Von Hippel-Lindau                 |
| 1080 | 2083 | 40 | WISP3                             |
| 1080 | 2083 | 40 | WT1                               |
| 1080 | 2083 | 40 | XPO1                              |
| 1080 | 2083 | 40 | XRCC3                             |
| 1080 | 2083 | 40 | ZNF217                            |
| 1081 | 2084 | 20 | ABL1                              |
| 1081 | 2084 | 20 | AKT1                              |
| 1081 | 2084 | 20 | AKT2                              |
| 1081 | 2084 | 20 | AKT3                              |
| 1081 | 2084 | 20 | ALK                               |
| 1081 | 2084 | 20 | ALOX12B                           |
| 1081 | 2084 | 20 | APC                               |
| 1081 | 2084 | 20 | APCDD1                            |
| 1081 | 2084 | 20 | AR                                |
| 1081 | 2084 | 20 | ARAF                              |
| 1081 | 2084 | 20 | ARFRP1                            |
| 1081 | 2084 | 20 | ARID1A                            |
| 1081 | 2084 | 20 | ARID2                             |
| 1081 | 2084 | 20 | ASXL1                             |
| 1081 | 2084 | 20 | ATM                               |
| 1081 | 2084 | 20 | ATR                               |
| 1081 | 2084 | 20 | ATRX                              |
| 1081 | 2084 | 20 | AURKA                             |
| 1081 | 2084 | 20 | AURKB                             |
| 1081 | 2084 | 20 | AXL                               |
| 1081 | 2084 | 20 | BACH1                             |
| 1081 | 2084 | 20 | BAP1                              |
| 1081 | 2084 | 20 | BARD1                             |
| 1081 | 2084 | 20 | BCL-2                             |
| 1081 | 2084 | 20 | BCL2L2                            |
| 1081 | 2084 | 20 | BCL6                              |
| 1081 | 2084 | 20 | BCOR                              |
| 1081 | 2084 | 20 | BCORL1                            |
| 1081 | 2084 | 20 | BCR                               |
| 1081 | 2084 | 20 | BLM                               |
| 1081 | 2084 | 20 | BRAF                              |
| 1081 | 2084 | 20 | BRCA1                             |

|      |      |    |                                       |
|------|------|----|---------------------------------------|
| 1081 | 2084 | 20 | BRCA2                                 |
| 1081 | 2084 | 20 | BRIP1                                 |
| 1081 | 2084 | 20 | BTG1                                  |
| 1081 | 2084 | 20 | BTK                                   |
| 1081 | 2084 | 20 | C17orf39                              |
| 1081 | 2084 | 20 | CARD11                                |
| 1081 | 2084 | 20 | CASP8                                 |
| 1081 | 2084 | 20 | CBFB                                  |
| 1081 | 2084 | 20 | CBL                                   |
| 1081 | 2084 | 20 | CCND1                                 |
| 1081 | 2084 | 20 | CCND2                                 |
| 1081 | 2084 | 20 | CCND3                                 |
| 1081 | 2084 | 20 | CCNE1                                 |
| 1081 | 2084 | 20 | CD79A                                 |
| 1081 | 2084 | 20 | CD79B                                 |
| 1081 | 2084 | 20 | CDC73                                 |
| 1081 | 2084 | 20 | CDH1                                  |
| 1081 | 2084 | 20 | CDK12                                 |
| 1081 | 2084 | 20 | Cyclin dependent kinase-4             |
| 1081 | 2084 | 20 | CDK6                                  |
| 1081 | 2084 | 20 | CDK8                                  |
| 1081 | 2084 | 20 | CDKN1B                                |
| 1081 | 2084 | 20 | CDKN2A                                |
| 1081 | 2084 | 20 | CDKN2B                                |
| 1081 | 2084 | 20 | CDKN2C                                |
| 1081 | 2084 | 20 | CCAT/enhancer binding protein (CEBPA) |
| 1081 | 2084 | 20 | CHEK1                                 |
| 1081 | 2084 | 20 | CHEK2                                 |
| 1081 | 2084 | 20 | CHUK                                  |
| 1081 | 2084 | 20 | CIC                                   |
| 1081 | 2084 | 20 | CRBN                                  |
| 1081 | 2084 | 20 | CREBBP                                |
| 1081 | 2084 | 20 | CRKL                                  |
| 1081 | 2084 | 20 | CRLF2                                 |
| 1081 | 2084 | 20 | CSF1R                                 |
| 1081 | 2084 | 20 | CTCF                                  |
| 1081 | 2084 | 20 | CTNNA1                                |
| 1081 | 2084 | 20 | CTNNB1                                |
| 1081 | 2084 | 20 | CUL4A                                 |
| 1081 | 2084 | 20 | CUL4B                                 |

|      |      |    |                                  |
|------|------|----|----------------------------------|
| 1081 | 2084 | 20 | CYP17A1                          |
| 1081 | 2084 | 20 | DAXX                             |
| 1081 | 2084 | 20 | DDR2                             |
| 1081 | 2084 | 20 | DIS3                             |
| 1081 | 2084 | 20 | DNMT3A                           |
| 1081 | 2084 | 20 | DOT1L                            |
| 1081 | 2084 | 20 | Epidermal Growth Factor Receptor |
| 1081 | 2084 | 20 | EMSY                             |
| 1081 | 2084 | 20 | EP300                            |
| 1081 | 2084 | 20 | EPHA3                            |
| 1081 | 2084 | 20 | EPHA5                            |
| 1081 | 2084 | 20 | EPHB1                            |
| 1081 | 2084 | 20 | ERBB2                            |
| 1081 | 2084 | 20 | ERBB3                            |
| 1081 | 2084 | 20 | ERBB4                            |
| 1081 | 2084 | 20 | ERG                              |
| 1081 | 2084 | 20 | Estrogen receptor 1              |
| 1081 | 2084 | 20 | ETV1                             |
| 1081 | 2084 | 20 | ETV4                             |
| 1081 | 2084 | 20 | ETV5                             |
| 1081 | 2084 | 20 | ETV6                             |
| 1081 | 2084 | 20 | EWSR1                            |
| 1081 | 2084 | 20 | EZH2                             |
| 1081 | 2084 | 20 | FAM123B(WTX)                     |
| 1081 | 2084 | 20 | FAM46C                           |
| 1081 | 2084 | 20 | FANCA                            |
| 1081 | 2084 | 20 | FANCC                            |
| 1081 | 2084 | 20 | FANCD2                           |
| 1081 | 2084 | 20 | FANCE                            |
| 1081 | 2084 | 20 | FANCF                            |
| 1081 | 2084 | 20 | FANCG                            |
| 1081 | 2084 | 20 | FANCI                            |
| 1081 | 2084 | 20 | FANCL                            |
| 1081 | 2084 | 20 | FANCM                            |
| 1081 | 2084 | 20 | FAT3                             |
| 1081 | 2084 | 20 | FBXW7                            |
| 1081 | 2084 | 20 | FGF10                            |
| 1081 | 2084 | 20 | FGF12                            |
| 1081 | 2084 | 20 | FGF14                            |
| 1081 | 2084 | 20 | Fibroblast growth factor 19      |

|      |      |    |                                                  |
|------|------|----|--------------------------------------------------|
| 1081 | 2084 | 20 | Fibroblast growth factor 23                      |
| 1081 | 2084 | 20 | Fibroblast growth factor 3                       |
| 1081 | 2084 | 20 | FGF4                                             |
| 1081 | 2084 | 20 | FGF6                                             |
| 1081 | 2084 | 20 | FGF7                                             |
| 1081 | 2084 | 20 | Fibroblast growth receptor 1                     |
| 1081 | 2084 | 20 | Fibroblast growth receptor 2                     |
| 1081 | 2084 | 20 | Fibroblast growth receptor 3                     |
| 1081 | 2084 | 20 | Fibroblast growth receptor 4                     |
| 1081 | 2084 | 20 | FLT1                                             |
| 1081 | 2084 | 20 | Fms-like tyrosine kinase 3 (FLT3)                |
| 1081 | 2084 | 20 | FLT4                                             |
| 1081 | 2084 | 20 | FOXL2                                            |
| 1081 | 2084 | 20 | GATA1                                            |
| 1081 | 2084 | 20 | GATA2                                            |
| 1081 | 2084 | 20 | GATA3                                            |
| 1081 | 2084 | 20 | GNA13                                            |
| 1081 | 2084 | 20 | GNAQ                                             |
| 1081 | 2084 | 20 | GNAS                                             |
| 1081 | 2084 | 20 | GPR124                                           |
| 1081 | 2084 | 20 | GRIN2A                                           |
| 1081 | 2084 | 20 | GSK3B                                            |
| 1081 | 2084 | 20 | Hepatocyte growth factor                         |
| 1081 | 2084 | 20 | HLA-A                                            |
| 1081 | 2084 | 20 | HRAS                                             |
| 1081 | 2084 | 20 | IDH1                                             |
| 1081 | 2084 | 20 | IDH2                                             |
| 1081 | 2084 | 20 | Insulin-like growth factor 1                     |
| 1081 | 2084 | 20 | Insulin growth factor 1 receptor                 |
| 1081 | 2084 | 20 | Insulin-like growth factor 2, also somatomedin A |
| 1081 | 2084 | 20 | IKBKE                                            |
| 1081 | 2084 | 20 | IKZF1                                            |
| 1081 | 2084 | 20 | IL7R                                             |
| 1081 | 2084 | 20 | INHBA                                            |
| 1081 | 2084 | 20 | IRF4                                             |
| 1081 | 2084 | 20 | IRS2                                             |
| 1081 | 2084 | 20 | JAK1                                             |
| 1081 | 2084 | 20 | JAK2                                             |
| 1081 | 2084 | 20 | JAK3                                             |
| 1081 | 2084 | 20 | JUN                                              |

|      |      |    |                                                |
|------|------|----|------------------------------------------------|
| 1081 | 2084 | 20 | KDM5A                                          |
| 1081 | 2084 | 20 | KDM5C                                          |
| 1081 | 2084 | 20 | KDM6A                                          |
| 1081 | 2084 | 20 | KDR                                            |
| 1081 | 2084 | 20 | KEAP1                                          |
| 1081 | 2084 | 20 | KIT                                            |
| 1081 | 2084 | 20 | KLHL6                                          |
| 1081 | 2084 | 20 | KRAS                                           |
| 1081 | 2084 | 20 | LMO1                                           |
| 1081 | 2084 | 20 | LRP1B                                          |
| 1081 | 2084 | 20 | MAP2K1                                         |
| 1081 | 2084 | 20 | MAP2K2                                         |
| 1081 | 2084 | 20 | MAP2K4                                         |
| 1081 | 2084 | 20 | MAP3K1                                         |
| 1081 | 2084 | 20 | MAP3K13                                        |
| 1081 | 2084 | 20 | MCL1                                           |
| 1081 | 2084 | 20 | MDM2                                           |
| 1081 | 2084 | 20 | MDM4                                           |
| 1081 | 2084 | 20 | MED12                                          |
| 1081 | 2084 | 20 | MEF2B                                          |
| 1081 | 2084 | 20 | MEN1                                           |
| 1081 | 2084 | 20 | MET                                            |
| 1081 | 2084 | 20 | Microphthalmia associated transcription factor |
| 1081 | 2084 | 20 | MLH1                                           |
| 1081 | 2084 | 20 | MLL                                            |
| 1081 | 2084 | 20 | MLL2                                           |
| 1081 | 2084 | 20 | MPL                                            |
| 1081 | 2084 | 20 | MRE11A                                         |
| 1081 | 2084 | 20 | MSH2                                           |
| 1081 | 2084 | 20 | MSH6                                           |
| 1081 | 2084 | 20 | MTOR                                           |
| 1081 | 2084 | 20 | MUTYH                                          |
| 1081 | 2084 | 20 | MYC                                            |
| 1081 | 2084 | 20 | MYCL1                                          |
| 1081 | 2084 | 20 | MYCN                                           |
| 1081 | 2084 | 20 | MYD88                                          |
| 1081 | 2084 | 20 | MYST3                                          |
| 1081 | 2084 | 20 | NBN                                            |
| 1081 | 2084 | 20 | NCOR1                                          |
| 1081 | 2084 | 20 | NF1                                            |

|      |      |    |                      |
|------|------|----|----------------------|
| 1081 | 2084 | 20 | NF2                  |
| 1081 | 2084 | 20 | NFE2L2               |
| 1081 | 2084 | 20 | NFKBIA               |
| 1081 | 2084 | 20 | NKX2-1               |
| 1081 | 2084 | 20 | NOTCH1               |
| 1081 | 2084 | 20 | NOTCH2               |
| 1081 | 2084 | 20 | NOTCH3               |
| 1081 | 2084 | 20 | NOTCH4               |
| 1081 | 2084 | 20 | Nucleophosmin (NPM1) |
| 1081 | 2084 | 20 | NRAS                 |
| 1081 | 2084 | 20 | NSD1                 |
| 1081 | 2084 | 20 | NTRK1                |
| 1081 | 2084 | 20 | NTRK2                |
| 1081 | 2084 | 20 | NTRK3                |
| 1081 | 2084 | 20 | NUP93                |
| 1081 | 2084 | 20 | PAK3                 |
| 1081 | 2084 | 20 | PAK7                 |
| 1081 | 2084 | 20 | PALB2                |
| 1081 | 2084 | 20 | PARP1                |
| 1081 | 2084 | 20 | PARP2                |
| 1081 | 2084 | 20 | PARP3                |
| 1081 | 2084 | 20 | PARP4                |
| 1081 | 2084 | 20 | PAX5                 |
| 1081 | 2084 | 20 | PBRM1                |
| 1081 | 2084 | 20 | PDGFRA               |
| 1081 | 2084 | 20 | PDGFRB               |
| 1081 | 2084 | 20 | PK1                  |
| 1081 | 2084 | 20 | PIK3C2G              |
| 1081 | 2084 | 20 | PIK3C3               |
| 1081 | 2084 | 20 | <i>PIK3CA</i>        |
| 1081 | 2084 | 20 | PIK3CG               |
| 1081 | 2084 | 20 | PIK3R1               |
| 1081 | 2084 | 20 | PIK3R2               |
| 1081 | 2084 | 20 | PMS2                 |
| 1081 | 2084 | 20 | PNRC1                |
| 1081 | 2084 | 20 | PPP2R1A              |
| 1081 | 2084 | 20 | PRDM1                |
| 1081 | 2084 | 20 | PRKAR1A              |
| 1081 | 2084 | 20 | PRKDC                |
| 1081 | 2084 | 20 | PRSS8                |

|      |      |    |                                |
|------|------|----|--------------------------------|
| 1081 | 2084 | 20 | PTCH1                          |
| 1081 | 2084 | 20 | Phosphatase and Tensin homolog |
| 1081 | 2084 | 20 | PTPN11                         |
| 1081 | 2084 | 20 | RAD50                          |
| 1081 | 2084 | 20 | RAD51                          |
| 1081 | 2084 | 20 | RAD51B                         |
| 1081 | 2084 | 20 | RAD51C                         |
| 1081 | 2084 | 20 | RAD51D                         |
| 1081 | 2084 | 20 | RAD52                          |
| 1081 | 2084 | 20 | RAD54L                         |
| 1081 | 2084 | 20 | RAF1                           |
| 1081 | 2084 | 20 | RARA                           |
| 1081 | 2084 | 20 | 13q14(RB1)V                    |
| 1081 | 2084 | 20 | REL                            |
| 1081 | 2084 | 20 | RET                            |
| 1081 | 2084 | 20 | RICTOR                         |
| 1081 | 2084 | 20 | RNF43                          |
| 1081 | 2084 | 20 | ROS1                           |
| 1081 | 2084 | 20 | RPA1                           |
| 1081 | 2084 | 20 | RPTOR                          |
| 1081 | 2084 | 20 | RUNX1                          |
| 1081 | 2084 | 20 | RUNX1T1                        |
| 1081 | 2084 | 20 | SETD2                          |
| 1081 | 2084 | 20 | SF3B1                          |
| 1081 | 2084 | 20 | SH2B3                          |
| 1081 | 2084 | 20 | SMAD2                          |
| 1081 | 2084 | 20 | SMAD4                          |
| 1081 | 2084 | 20 | SMARCB1                        |
| 1081 | 2084 | 20 | SMARCD1                        |
| 1081 | 2084 | 20 | SMO                            |
| 1081 | 2084 | 20 | SOCS1                          |
| 1081 | 2084 | 20 | SOX10                          |
| 1081 | 2084 | 20 | SOX2                           |
| 1081 | 2084 | 20 | SPEN                           |
| 1081 | 2084 | 20 | SPOP                           |
| 1081 | 2084 | 20 | SRC                            |
| 1081 | 2084 | 20 | STAG2                          |
| 1081 | 2084 | 20 | STAT4                          |
| 1081 | 2084 | 20 | STK11                          |
| 1081 | 2084 | 20 | SUFU                           |

|      |      |    |                                   |
|------|------|----|-----------------------------------|
| 1081 | 2084 | 20 | SYK                               |
| 1081 | 2084 | 20 | TBX3                              |
| 1081 | 2084 | 20 | TET2                              |
| 1081 | 2084 | 20 | TGFBR2                            |
| 1081 | 2084 | 20 | TIPARP                            |
| 1081 | 2084 | 20 | TMPRSS2                           |
| 1081 | 2084 | 20 | TNFAIP3                           |
| 1081 | 2084 | 20 | TNFRSF14                          |
| 1081 | 2084 | 20 | TOP1                              |
| 1081 | 2084 | 20 | TRRAP                             |
| 1081 | 2084 | 20 | Tuberous sclerosis complex 1 gene |
| 1081 | 2084 | 20 | Tuberous sclerosis complex 2 gene |
| 1081 | 2084 | 20 | TSHR                              |
| 1081 | 2084 | 20 | Von Hippel-Lindau                 |
| 1081 | 2084 | 20 | WISP3                             |
| 1081 | 2084 | 20 | WT1                               |
| 1081 | 2084 | 20 | XPO1                              |
| 1081 | 2084 | 20 | XRCC3                             |
| 1081 | 2084 | 20 | ZNF217                            |
| 1081 | 2084 | 20 | ZNF703                            |
| 1081 |      | 20 | GNA11                             |
| 1082 | 2085 | 30 | ABL1                              |
| 1082 | 2085 | 30 | AKT1                              |
| 1082 | 2085 | 30 | AKT2                              |
| 1082 | 2085 | 30 | AKT3                              |
| 1082 | 2085 | 30 | ALK                               |
| 1082 | 2085 | 30 | ALOX12B                           |
| 1082 | 2085 | 30 | APC                               |
| 1082 | 2085 | 30 | APCDD1                            |
| 1082 | 2085 | 30 | AR                                |
| 1082 | 2085 | 30 | ARAF                              |
| 1082 | 2085 | 30 | ARFRP1                            |
| 1082 | 2085 | 30 | ARID2                             |
| 1082 | 2085 | 30 | ASXL1                             |
| 1082 | 2085 | 30 | ATM                               |
| 1082 | 2085 | 30 | ATR                               |
| 1082 | 2085 | 30 | ATRX                              |
| 1082 | 2085 | 30 | AURKA                             |
| 1082 | 2085 | 30 | AURKB                             |



|      |      |    |                                       |
|------|------|----|---------------------------------------|
| 1082 | 2085 | 30 | AXL                                   |
| 1082 | 2085 | 30 | BACH1                                 |
| 1082 | 2085 | 30 | BAP1                                  |
| 1082 | 2085 | 30 | BARD1                                 |
| 1082 | 2085 | 30 | BCL-2                                 |
| 1082 | 2085 | 30 | BCL2L2                                |
| 1082 | 2085 | 30 | BCL6                                  |
| 1082 | 2085 | 30 | BCOR                                  |
| 1082 | 2085 | 30 | BCORL1                                |
| 1082 | 2085 | 30 | BCR                                   |
| 1082 | 2085 | 30 | BLM                                   |
| 1082 | 2085 | 30 | BRAF                                  |
| 1082 | 2085 | 30 | BRCA1                                 |
| 1082 | 2085 | 30 | BRCA2                                 |
| 1082 | 2085 | 30 | BRIP1                                 |
| 1082 | 2085 | 30 | BTG1                                  |
| 1082 | 2085 | 30 | BTK                                   |
| 1082 | 2085 | 30 | C17orf39                              |
| 1082 | 2085 | 30 | CARD11                                |
| 1082 | 2085 | 30 | CASP8                                 |
| 1082 | 2085 | 30 | CBFB                                  |
| 1082 | 2085 | 30 | CBL                                   |
| 1082 | 2085 | 30 | CCND2                                 |
| 1082 | 2085 | 30 | CCND3                                 |
| 1082 | 2085 | 30 | CCNE1                                 |
| 1082 | 2085 | 30 | CD79A                                 |
| 1082 | 2085 | 30 | CD79B                                 |
| 1082 | 2085 | 30 | CDC73                                 |
| 1082 | 2085 | 30 | CDH1                                  |
| 1082 | 2085 | 30 | CDK12                                 |
| 1082 | 2085 | 30 | Cyclin dependent kinase-4             |
| 1082 | 2085 | 30 | CDK6                                  |
| 1082 | 2085 | 30 | CDK8                                  |
| 1082 | 2085 | 30 | CDKN1B                                |
| 1082 | 2085 | 30 | CDKN2A                                |
| 1082 | 2085 | 30 | CDKN2B                                |
| 1082 | 2085 | 30 | CDKN2C                                |
| 1082 | 2085 | 30 | CCAT/enhancer binding protein (CEBPA) |
| 1082 | 2085 | 30 | CHEK1                                 |
| 1082 | 2085 | 30 | CHEK2                                 |

|      |      |    |                                  |
|------|------|----|----------------------------------|
| 1082 | 2085 | 30 | CHUK                             |
| 1082 | 2085 | 30 | CIC                              |
| 1082 | 2085 | 30 | CRBN                             |
| 1082 | 2085 | 30 | CREBBP                           |
| 1082 | 2085 | 30 | CRKL                             |
| 1082 | 2085 | 30 | CRLF2                            |
| 1082 | 2085 | 30 | CSF1R                            |
| 1082 | 2085 | 30 | CTCF                             |
| 1082 | 2085 | 30 | CTNNA1                           |
| 1082 | 2085 | 30 | CTNNB1                           |
| 1082 | 2085 | 30 | CUL4A                            |
| 1082 | 2085 | 30 | CUL4B                            |
| 1082 | 2085 | 30 | CYP17A1                          |
| 1082 | 2085 | 30 | DAXX                             |
| 1082 | 2085 | 30 | DDR2                             |
| 1082 | 2085 | 30 | DIS3                             |
| 1082 | 2085 | 30 | DNMT3A                           |
| 1082 | 2085 | 30 | DOT1L                            |
| 1082 | 2085 | 30 | Epidermal Growth Factor Receptor |
| 1082 | 2085 | 30 | EP300                            |
| 1082 | 2085 | 30 | EPHA3                            |
| 1082 | 2085 | 30 | EPHA5                            |
| 1082 | 2085 | 30 | EPHB1                            |
| 1082 | 2085 | 30 | ERBB2                            |
| 1082 | 2085 | 30 | ERBB3                            |
| 1082 | 2085 | 30 | ERBB4                            |
| 1082 | 2085 | 30 | ERG                              |
| 1082 | 2085 | 30 | Estrogen receptor 1              |
| 1082 | 2085 | 30 | ETV1                             |
| 1082 | 2085 | 30 | ETV4                             |
| 1082 | 2085 | 30 | ETV5                             |
| 1082 | 2085 | 30 | ETV6                             |
| 1082 | 2085 | 30 | EWSR1                            |
| 1082 | 2085 | 30 | EZH2                             |
| 1082 | 2085 | 30 | FAM123B(WTX)                     |
| 1082 | 2085 | 30 | FAM46C                           |
| 1082 | 2085 | 30 | FANCA                            |
| 1082 | 2085 | 30 | FANCC                            |
| 1082 | 2085 | 30 | FANCD2                           |
| 1082 | 2085 | 30 | FANCE                            |

|      |      |    |                                                  |
|------|------|----|--------------------------------------------------|
| 1082 | 2085 | 30 | FANCF                                            |
| 1082 | 2085 | 30 | FANCG                                            |
| 1082 | 2085 | 30 | FANCI                                            |
| 1082 | 2085 | 30 | FANCL                                            |
| 1082 | 2085 | 30 | FANCM                                            |
| 1082 | 2085 | 30 | FAT3                                             |
| 1082 | 2085 | 30 | FBXW7                                            |
| 1082 | 2085 | 30 | FGF10                                            |
| 1082 | 2085 | 30 | FGF12                                            |
| 1082 | 2085 | 30 | FGF14                                            |
| 1082 | 2085 | 30 | Fibroblast growth factor 23                      |
| 1082 | 2085 | 30 | FGF6                                             |
| 1082 | 2085 | 30 | FGF7                                             |
| 1082 | 2085 | 30 | Fibroblast growth receptor 1                     |
| 1082 | 2085 | 30 | Fibroblast growth receptor 2                     |
| 1082 | 2085 | 30 | Fibroblast growth receptor 3                     |
| 1082 | 2085 | 30 | Fibroblast growth receptor 4                     |
| 1082 | 2085 | 30 | FLT1                                             |
| 1082 | 2085 | 30 | Fms-like tyrosine kinase 3 (FLT3)                |
| 1082 | 2085 | 30 | FLT4                                             |
| 1082 | 2085 | 30 | FOXL2                                            |
| 1082 | 2085 | 30 | GATA1                                            |
| 1082 | 2085 | 30 | GATA2                                            |
| 1082 | 2085 | 30 | GATA3                                            |
| 1082 | 2085 | 30 | GNA11                                            |
| 1082 | 2085 | 30 | GNA13                                            |
| 1082 | 2085 | 30 | GNAQ                                             |
| 1082 | 2085 | 30 | GNAS                                             |
| 1082 | 2085 | 30 | GPR124                                           |
| 1082 | 2085 | 30 | GRIN2A                                           |
| 1082 | 2085 | 30 | GSK3B                                            |
| 1082 | 2085 | 30 | Hepatocyte growth factor                         |
| 1082 | 2085 | 30 | HLA-A                                            |
| 1082 | 2085 | 30 | HRAS                                             |
| 1082 | 2085 | 30 | IDH1                                             |
| 1082 | 2085 | 30 | IDH2                                             |
| 1082 | 2085 | 30 | Insulin-like growth factor 1                     |
| 1082 | 2085 | 30 | Insulin growth factor 1 receptor                 |
| 1082 | 2085 | 30 | Insulin-like growth factor 2, also somatomedin A |
| 1082 | 2085 | 30 | IKBKE                                            |

|      |      |    |                                                |
|------|------|----|------------------------------------------------|
| 1082 | 2085 | 30 | IKZF1                                          |
| 1082 | 2085 | 30 | IL7R                                           |
| 1082 | 2085 | 30 | INHBA                                          |
| 1082 | 2085 | 30 | IRF4                                           |
| 1082 | 2085 | 30 | IRS2                                           |
| 1082 | 2085 | 30 | JAK1                                           |
| 1082 | 2085 | 30 | JAK2                                           |
| 1082 | 2085 | 30 | JAK3                                           |
| 1082 | 2085 | 30 | JUN                                            |
| 1082 | 2085 | 30 | KDM5A                                          |
| 1082 | 2085 | 30 | KDM5C                                          |
| 1082 | 2085 | 30 | KDM6A                                          |
| 1082 | 2085 | 30 | KDR                                            |
| 1082 | 2085 | 30 | KEAP1                                          |
| 1082 | 2085 | 30 | KIT                                            |
| 1082 | 2085 | 30 | KLHL6                                          |
| 1082 | 2085 | 30 | KRAS                                           |
| 1082 | 2085 | 30 | LMO1                                           |
| 1082 | 2085 | 30 | LRP1B                                          |
| 1082 | 2085 | 30 | MAP2K1                                         |
| 1082 | 2085 | 30 | MAP2K2                                         |
| 1082 | 2085 | 30 | MAP2K4                                         |
| 1082 | 2085 | 30 | MAP3K1                                         |
| 1082 | 2085 | 30 | MAP3K13                                        |
| 1082 | 2085 | 30 | MCL1                                           |
| 1082 | 2085 | 30 | MDM2                                           |
| 1082 | 2085 | 30 | MDM4                                           |
| 1082 | 2085 | 30 | MED12                                          |
| 1082 | 2085 | 30 | MEF2B                                          |
| 1082 | 2085 | 30 | MEN1                                           |
| 1082 | 2085 | 30 | MET                                            |
| 1082 | 2085 | 30 | Microphthalmia associated transcription factor |
| 1082 | 2085 | 30 | MLH1                                           |
| 1082 | 2085 | 30 | MLL                                            |
| 1082 | 2085 | 30 | MLL2                                           |
| 1082 | 2085 | 30 | MPL                                            |
| 1082 | 2085 | 30 | MRE11A                                         |
| 1082 | 2085 | 30 | MSH2                                           |
| 1082 | 2085 | 30 | MSH6                                           |
| 1082 | 2085 | 30 | MTOR                                           |

|      |      |    |                      |
|------|------|----|----------------------|
| 1082 | 2085 | 30 | MUTYH                |
| 1082 | 2085 | 30 | MYC                  |
| 1082 | 2085 | 30 | MYCL1                |
| 1082 | 2085 | 30 | MYCN                 |
| 1082 | 2085 | 30 | MYD88                |
| 1082 | 2085 | 30 | MYST3                |
| 1082 | 2085 | 30 | NBN                  |
| 1082 | 2085 | 30 | NCOR1                |
| 1082 | 2085 | 30 | NF1                  |
| 1082 | 2085 | 30 | NF2                  |
| 1082 | 2085 | 30 | NFE2L2               |
| 1082 | 2085 | 30 | NFKBIA               |
| 1082 | 2085 | 30 | NKX2-1               |
| 1082 | 2085 | 30 | NOTCH1               |
| 1082 | 2085 | 30 | NOTCH2               |
| 1082 | 2085 | 30 | NOTCH3               |
| 1082 | 2085 | 30 | NOTCH4               |
| 1082 | 2085 | 30 | Nucleophosmin (NPM1) |
| 1082 | 2085 | 30 | NRAS                 |
| 1082 | 2085 | 30 | NSD1                 |
| 1082 | 2085 | 30 | NTRK1                |
| 1082 | 2085 | 30 | NTRK2                |
| 1082 | 2085 | 30 | NTRK3                |
| 1082 | 2085 | 30 | NUP93                |
| 1082 | 2085 | 30 | PAK3                 |
| 1082 | 2085 | 30 | PAK7                 |
| 1082 | 2085 | 30 | PALB2                |
| 1082 | 2085 | 30 | PARP1                |
| 1082 | 2085 | 30 | PARP2                |
| 1082 | 2085 | 30 | PARP3                |
| 1082 | 2085 | 30 | PARP4                |
| 1082 | 2085 | 30 | PAX5                 |
| 1082 | 2085 | 30 | PBRM1                |
| 1082 | 2085 | 30 | PDGFRA               |
| 1082 | 2085 | 30 | PDGFRB               |
| 1082 | 2085 | 30 | PDK1                 |
| 1082 | 2085 | 30 | PIK3C2G              |
| 1082 | 2085 | 30 | PIK3C3               |
| 1082 | 2085 | 30 | PIK3CG               |
| 1082 | 2085 | 30 | PIK3R1               |

|      |      |    |                                |
|------|------|----|--------------------------------|
| 1082 | 2085 | 30 | PIK3R2                         |
| 1082 | 2085 | 30 | PMS2                           |
| 1082 | 2085 | 30 | PNRC1                          |
| 1082 | 2085 | 30 | PPP2R1A                        |
| 1082 | 2085 | 30 | PRDM1                          |
| 1082 | 2085 | 30 | PRKAR1A                        |
| 1082 | 2085 | 30 | PRKDC                          |
| 1082 | 2085 | 30 | PRSS8                          |
| 1082 | 2085 | 30 | PTCH1                          |
| 1082 | 2085 | 30 | Phosphatase and Tensin homolog |
| 1082 | 2085 | 30 | PTPN11                         |
| 1082 | 2085 | 30 | RAD50                          |
| 1082 | 2085 | 30 | RAD51                          |
| 1082 | 2085 | 30 | RAD51B                         |
| 1082 | 2085 | 30 | RAD51C                         |
| 1082 | 2085 | 30 | RAD51D                         |
| 1082 | 2085 | 30 | RAD52                          |
| 1082 | 2085 | 30 | RAD54L                         |
| 1082 | 2085 | 30 | RAF1                           |
| 1082 | 2085 | 30 | RARA                           |
| 1082 | 2085 | 30 | 13q14(RB1)V                    |
| 1082 | 2085 | 30 | REL                            |
| 1082 | 2085 | 30 | RET                            |
| 1082 | 2085 | 30 | RICTOR                         |
| 1082 | 2085 | 30 | RNF43                          |
| 1082 | 2085 | 30 | ROS1                           |
| 1082 | 2085 | 30 | RPA1                           |
| 1082 | 2085 | 30 | RPTOR                          |
| 1082 | 2085 | 30 | RUNX1                          |
| 1082 | 2085 | 30 | RUNX1T1                        |
| 1082 | 2085 | 30 | SETD2                          |
| 1082 | 2085 | 30 | SF3B1                          |
| 1082 | 2085 | 30 | SH2B3                          |
| 1082 | 2085 | 30 | SMAD2                          |
| 1082 | 2085 | 30 | SMAD4                          |
| 1082 | 2085 | 30 | SMARCA4                        |
| 1082 | 2085 | 30 | SMARCB1                        |
| 1082 | 2085 | 30 | SMARCD1                        |
| 1082 | 2085 | 30 | SMO                            |
| 1082 | 2085 | 30 | SOCS1                          |

|      |      |    |                                   |
|------|------|----|-----------------------------------|
| 1082 | 2085 | 30 | SOX10                             |
| 1082 | 2085 | 30 | SOX2                              |
| 1082 | 2085 | 30 | SPEN                              |
| 1082 | 2085 | 30 | SPOP                              |
| 1082 | 2085 | 30 | SRC                               |
| 1082 | 2085 | 30 | STAG2                             |
| 1082 | 2085 | 30 | STAT4                             |
| 1082 | 2085 | 30 | STK11                             |
| 1082 | 2085 | 30 | SUFU                              |
| 1082 | 2085 | 30 | SYK                               |
| 1082 | 2085 | 30 | TBX3                              |
| 1082 | 2085 | 30 | TET2                              |
| 1082 | 2085 | 30 | TGFBR2                            |
| 1082 | 2085 | 30 | TIPARP                            |
| 1082 | 2085 | 30 | TMPRSS2                           |
| 1082 | 2085 | 30 | TNFAIP3                           |
| 1082 | 2085 | 30 | TNFRSF14                          |
| 1082 | 2085 | 30 | TOP1                              |
| 1082 | 2085 | 30 | TP53                              |
| 1082 | 2085 | 30 | TRRAP                             |
| 1082 | 2085 | 30 | Tuberous sclerosis complex 1 gene |
| 1082 | 2085 | 30 | Tuberous sclerosis complex 2 gene |
| 1082 | 2085 | 30 | TSHR                              |
| 1082 | 2085 | 30 | Von Hippel-Lindau                 |
| 1082 | 2085 | 30 | WISP3                             |
| 1082 | 2085 | 30 | WT1                               |
| 1082 | 2085 | 30 | XPO1                              |
| 1082 | 2085 | 30 | XRCC3                             |
| 1082 | 2085 | 30 | ZNF217                            |
| 1082 | 2085 | 30 | ZNF703                            |
| 1083 | 2086 | 20 | ABL1                              |
| 1083 | 2086 | 20 | AKT1                              |
| 1083 | 2086 | 20 | AKT2                              |
| 1083 | 2086 | 20 | AKT3                              |
| 1083 | 2086 | 20 | ALK                               |
| 1083 | 2086 | 20 | ALOX12B                           |
| 1083 | 2086 | 20 | APC                               |
| 1083 | 2086 | 20 | APCDD1                            |
| 1083 | 2086 | 20 | AR                                |

|      |      |    |          |
|------|------|----|----------|
| 1083 | 2086 | 20 | ARAF     |
| 1083 | 2086 | 20 | ARFRP1   |
| 1083 | 2086 | 20 | ARID1A   |
| 1083 | 2086 | 20 | ARID2    |
| 1083 | 2086 | 20 | ASXL1    |
| 1083 | 2086 | 20 | ATR      |
| 1083 | 2086 | 20 | ATRX     |
| 1083 | 2086 | 20 | AURKA    |
| 1083 | 2086 | 20 | AURKB    |
| 1083 | 2086 | 20 | AXL      |
| 1083 | 2086 | 20 | BACH1    |
| 1083 | 2086 | 20 | BAP1     |
| 1083 | 2086 | 20 | BARD1    |
| 1083 | 2086 | 20 | BCL-2    |
| 1083 | 2086 | 20 | BCL2L2   |
| 1083 | 2086 | 20 | BCL6     |
| 1083 | 2086 | 20 | BCOR     |
| 1083 | 2086 | 20 | BCORL1   |
| 1083 | 2086 | 20 | BCR      |
| 1083 | 2086 | 20 | BLM      |
| 1083 | 2086 | 20 | BRAF     |
| 1083 | 2086 | 20 | BRCA1    |
| 1083 | 2086 | 20 | BRCA2    |
| 1083 | 2086 | 20 | BRIP1    |
| 1083 | 2086 | 20 | BTG1     |
| 1083 | 2086 | 20 | BTK      |
| 1083 | 2086 | 20 | C17orf39 |
| 1083 | 2086 | 20 | CARD11   |
| 1083 | 2086 | 20 | CASP8    |
| 1083 | 2086 | 20 | CBFB     |
| 1083 | 2086 | 20 | CBL      |
| 1083 | 2086 | 20 | CCND1    |
| 1083 | 2086 | 20 | CCND2    |
| 1083 | 2086 | 20 | CCND3    |
| 1083 | 2086 | 20 | CCNE1    |
| 1083 | 2086 | 20 | CD79A    |
| 1083 | 2086 | 20 | CD79B    |
| 1083 | 2086 | 20 | CDC73    |
| 1083 | 2086 | 20 | CDH1     |
| 1083 | 2086 | 20 | CDK12    |



|      |      |    |                                       |
|------|------|----|---------------------------------------|
| 1083 | 2086 | 20 | Cyclin dependent kinase-4             |
| 1083 | 2086 | 20 | CDK6                                  |
| 1083 | 2086 | 20 | CDK8                                  |
| 1083 | 2086 | 20 | CDKN1B                                |
| 1083 | 2086 | 20 | CDKN2A                                |
| 1083 | 2086 | 20 | CDKN2B                                |
| 1083 | 2086 | 20 | CDKN2C                                |
| 1083 | 2086 | 20 | CCAT/enhancer binding protein (CEBPA) |
| 1083 | 2086 | 20 | CHEK1                                 |
| 1083 | 2086 | 20 | CHEK2                                 |
| 1083 | 2086 | 20 | CHUK                                  |
| 1083 | 2086 | 20 | CIC                                   |
| 1083 | 2086 | 20 | CRBN                                  |
| 1083 | 2086 | 20 | CREBBP                                |
| 1083 | 2086 | 20 | CRKL                                  |
| 1083 | 2086 | 20 | CRLF2                                 |
| 1083 | 2086 | 20 | CSF1R                                 |
| 1083 | 2086 | 20 | CTCF                                  |
| 1083 | 2086 | 20 | CTNNA1                                |
| 1083 | 2086 | 20 | CTNNB1                                |
| 1083 | 2086 | 20 | CUL4A                                 |
| 1083 | 2086 | 20 | CUL4B                                 |
| 1083 | 2086 | 20 | CYP17A1                               |
| 1083 | 2086 | 20 | DAXX                                  |
| 1083 | 2086 | 20 | DDR2                                  |
| 1083 | 2086 | 20 | DIS3                                  |
| 1083 | 2086 | 20 | DNMT3A                                |
| 1083 | 2086 | 20 | DOT1L                                 |
| 1083 | 2086 | 20 | Epidermal Growth Factor Receptor      |
| 1083 | 2086 | 20 | EMSY                                  |
| 1083 | 2086 | 20 | EPHA3                                 |
| 1083 | 2086 | 20 | EPHA5                                 |
| 1083 | 2086 | 20 | EPHB1                                 |
| 1083 | 2086 | 20 | ERBB2                                 |
| 1083 | 2086 | 20 | ERBB3                                 |
| 1083 | 2086 | 20 | ERBB4                                 |
| 1083 | 2086 | 20 | ERG                                   |
| 1083 | 2086 | 20 | ETV1                                  |
| 1083 | 2086 | 20 | ETV4                                  |

|      |      |    |                                   |
|------|------|----|-----------------------------------|
| 1083 | 2086 | 20 | ETV5                              |
| 1083 | 2086 | 20 | ETV6                              |
| 1083 | 2086 | 20 | EWSR1                             |
| 1083 | 2086 | 20 | EZH2                              |
| 1083 | 2086 | 20 | FAM123B(WTX)                      |
| 1083 | 2086 | 20 | FAM46C                            |
| 1083 | 2086 | 20 | FANCA                             |
| 1083 | 2086 | 20 | FANCC                             |
| 1083 | 2086 | 20 | FANCD2                            |
| 1083 | 2086 | 20 | FANCE                             |
| 1083 | 2086 | 20 | FANCF                             |
| 1083 | 2086 | 20 | FANCG                             |
| 1083 | 2086 | 20 | FANCI                             |
| 1083 | 2086 | 20 | FANCL                             |
| 1083 | 2086 | 20 | FANCM                             |
| 1083 | 2086 | 20 | FAT3                              |
| 1083 | 2086 | 20 | FBXW7                             |
| 1083 | 2086 | 20 | FGF10                             |
| 1083 | 2086 | 20 | FGF12                             |
| 1083 | 2086 | 20 | FGF14                             |
| 1083 | 2086 | 20 | Fibroblast growth factor 19       |
| 1083 | 2086 | 20 | Fibroblast growth factor 23       |
| 1083 | 2086 | 20 | Fibroblast growth factor 3        |
| 1083 | 2086 | 20 | FGF4                              |
| 1083 | 2086 | 20 | FGF6                              |
| 1083 | 2086 | 20 | FGF7                              |
| 1083 | 2086 | 20 | Fibroblast growth receptor 1      |
| 1083 | 2086 | 20 | Fibroblast growth receptor 2      |
| 1083 | 2086 | 20 | Fibroblast growth receptor 3      |
| 1083 | 2086 | 20 | Fibroblast growth receptor 4      |
| 1083 | 2086 | 20 | FLT1                              |
| 1083 | 2086 | 20 | Fms-like tyrosine kinase 3 (FLT3) |
| 1083 | 2086 | 20 | FLT4                              |
| 1083 | 2086 | 20 | FOXL2                             |
| 1083 | 2086 | 20 | GATA1                             |
| 1083 | 2086 | 20 | GATA2                             |
| 1083 | 2086 | 20 | GATA3                             |
| 1083 | 2086 | 20 | GNA11                             |
| 1083 | 2086 | 20 | GNA13                             |
| 1083 | 2086 | 20 | GNAQ                              |

|      |      |    |                                                  |
|------|------|----|--------------------------------------------------|
| 1083 | 2086 | 20 | GNAS                                             |
| 1083 | 2086 | 20 | GPR124                                           |
| 1083 | 2086 | 20 | GRIN2A                                           |
| 1083 | 2086 | 20 | GSK3B                                            |
| 1083 | 2086 | 20 | Hepatocyte growth factor                         |
| 1083 | 2086 | 20 | HLA-A                                            |
| 1083 | 2086 | 20 | HRAS                                             |
| 1083 | 2086 | 20 | IDH1                                             |
| 1083 | 2086 | 20 | IDH2                                             |
| 1083 | 2086 | 20 | Insulin-like growth factor 1                     |
| 1083 | 2086 | 20 | Insulin growth factor 1 receptor                 |
| 1083 | 2086 | 20 | Insulin-like growth factor 2, also somatomedin A |
| 1083 | 2086 | 20 | IKBKE                                            |
| 1083 | 2086 | 20 | IKZF1                                            |
| 1083 | 2086 | 20 | IL7R                                             |
| 1083 | 2086 | 20 | INHBA                                            |
| 1083 | 2086 | 20 | IRF4                                             |
| 1083 | 2086 | 20 | IRS2                                             |
| 1083 | 2086 | 20 | JAK1                                             |
| 1083 | 2086 | 20 | JAK2                                             |
| 1083 | 2086 | 20 | JAK3                                             |
| 1083 | 2086 | 20 | JUN                                              |
| 1083 | 2086 | 20 | KDM5A                                            |
| 1083 | 2086 | 20 | KDM5C                                            |
| 1083 | 2086 | 20 | KDM6A                                            |
| 1083 | 2086 | 20 | KDR                                              |
| 1083 | 2086 | 20 | KEAP1                                            |
| 1083 | 2086 | 20 | KIT                                              |
| 1083 | 2086 | 20 | KLHL6                                            |
| 1083 | 2086 | 20 | KRAS                                             |
| 1083 | 2086 | 20 | LMO1                                             |
| 1083 | 2086 | 20 | LRP1B                                            |
| 1083 | 2086 | 20 | MAP2K1                                           |
| 1083 | 2086 | 20 | MAP2K2                                           |
| 1083 | 2086 | 20 | MAP2K4                                           |
| 1083 | 2086 | 20 | MAP3K1                                           |
| 1083 | 2086 | 20 | MAP3K13                                          |
| 1083 | 2086 | 20 | MCL1                                             |
| 1083 | 2086 | 20 | MDM2                                             |
| 1083 | 2086 | 20 | MDM4                                             |

|      |      |    |                                                |
|------|------|----|------------------------------------------------|
| 1083 | 2086 | 20 | MED12                                          |
| 1083 | 2086 | 20 | MEF2B                                          |
| 1083 | 2086 | 20 | MEN1                                           |
| 1083 | 2086 | 20 | MET                                            |
| 1083 | 2086 | 20 | Microphthalmia associated transcription factor |
| 1083 | 2086 | 20 | MLH1                                           |
| 1083 | 2086 | 20 | MLL                                            |
| 1083 | 2086 | 20 | MLL2                                           |
| 1083 | 2086 | 20 | MPL                                            |
| 1083 | 2086 | 20 | MRE11A                                         |
| 1083 | 2086 | 20 | MSH2                                           |
| 1083 | 2086 | 20 | MSH6                                           |
| 1083 | 2086 | 20 | MTOR                                           |
| 1083 | 2086 | 20 | MUTYH                                          |
| 1083 | 2086 | 20 | MYC                                            |
| 1083 | 2086 | 20 | MYCL1                                          |
| 1083 | 2086 | 20 | MYCN                                           |
| 1083 | 2086 | 20 | MYD88                                          |
| 1083 | 2086 | 20 | MYST3                                          |
| 1083 | 2086 | 20 | NBN                                            |
| 1083 | 2086 | 20 | NCOR1                                          |
| 1083 | 2086 | 20 | NF1                                            |
| 1083 | 2086 | 20 | NF2                                            |
| 1083 | 2086 | 20 | NFE2L2                                         |
| 1083 | 2086 | 20 | NFKBIA                                         |
| 1083 | 2086 | 20 | NKX2-1                                         |
| 1083 | 2086 | 20 | NOTCH1                                         |
| 1083 | 2086 | 20 | NOTCH2                                         |
| 1083 | 2086 | 20 | NOTCH3                                         |
| 1083 | 2086 | 20 | NOTCH4                                         |
| 1083 | 2086 | 20 | Nucleophosmin (NPM1)                           |
| 1083 | 2086 | 20 | NRAS                                           |
| 1083 | 2086 | 20 | NSD1                                           |
| 1083 | 2086 | 20 | NTRK1                                          |
| 1083 | 2086 | 20 | NTRK2                                          |
| 1083 | 2086 | 20 | NTRK3                                          |
| 1083 | 2086 | 20 | NUP93                                          |
| 1083 | 2086 | 20 | PAK3                                           |
| 1083 | 2086 | 20 | PAK7                                           |
| 1083 | 2086 | 20 | PALB2                                          |

|      |      |    |                                |
|------|------|----|--------------------------------|
| 1083 | 2086 | 20 | PARP1                          |
| 1083 | 2086 | 20 | PARP2                          |
| 1083 | 2086 | 20 | PARP3                          |
| 1083 | 2086 | 20 | PARP4                          |
| 1083 | 2086 | 20 | PAX5                           |
| 1083 | 2086 | 20 | PBRM1                          |
| 1083 | 2086 | 20 | PDGFRA                         |
| 1083 | 2086 | 20 | PDGFRB                         |
| 1083 | 2086 | 20 | PDK1                           |
| 1083 | 2086 | 20 | PIK3C2G                        |
| 1083 | 2086 | 20 | PIK3C3                         |
| 1083 | 2086 | 20 | <i>PIK3CA</i>                  |
| 1083 | 2086 | 20 | PIK3CG                         |
| 1083 | 2086 | 20 | PIK3R1                         |
| 1083 | 2086 | 20 | PIK3R2                         |
| 1083 | 2086 | 20 | PMS2                           |
| 1083 | 2086 | 20 | PNRC1                          |
| 1083 | 2086 | 20 | PPP2R1A                        |
| 1083 | 2086 | 20 | PRDM1                          |
| 1083 | 2086 | 20 | PRKAR1A                        |
| 1083 | 2086 | 20 | PRKDC                          |
| 1083 | 2086 | 20 | PRSS8                          |
| 1083 | 2086 | 20 | PTCH1                          |
| 1083 | 2086 | 20 | Phosphatase and Tensin homolog |
| 1083 | 2086 | 20 | PTPN11                         |
| 1083 | 2086 | 20 | RAD50                          |
| 1083 | 2086 | 20 | RAD51                          |
| 1083 | 2086 | 20 | RAD51B                         |
| 1083 | 2086 | 20 | RAD51C                         |
| 1083 | 2086 | 20 | RAD51D                         |
| 1083 | 2086 | 20 | RAD52                          |
| 1083 | 2086 | 20 | RAD54L                         |
| 1083 | 2086 | 20 | RAF1                           |
| 1083 | 2086 | 20 | RARA                           |
| 1083 | 2086 | 20 | 13q14(RB1)V                    |
| 1083 | 2086 | 20 | REL                            |
| 1083 | 2086 | 20 | RET                            |
| 1083 | 2086 | 20 | RICTOR                         |
| 1083 | 2086 | 20 | RNF43                          |
| 1083 | 2086 | 20 | ROS1                           |

|      |      |    |                                   |
|------|------|----|-----------------------------------|
| 1083 | 2086 | 20 | RPA1                              |
| 1083 | 2086 | 20 | RPTOR                             |
| 1083 | 2086 | 20 | RUNX1                             |
| 1083 | 2086 | 20 | RUNX1T1                           |
| 1083 | 2086 | 20 | SETD2                             |
| 1083 | 2086 | 20 | SF3B1                             |
| 1083 | 2086 | 20 | SH2B3                             |
| 1083 | 2086 | 20 | SMAD2                             |
| 1083 | 2086 | 20 | SMAD4                             |
| 1083 | 2086 | 20 | SMARCA4                           |
| 1083 | 2086 | 20 | SMARCB1                           |
| 1083 | 2086 | 20 | SMARCD1                           |
| 1083 | 2086 | 20 | SMO                               |
| 1083 | 2086 | 20 | SOCS1                             |
| 1083 | 2086 | 20 | SOX10                             |
| 1083 | 2086 | 20 | SOX2                              |
| 1083 | 2086 | 20 | SPEN                              |
| 1083 | 2086 | 20 | SPOP                              |
| 1083 | 2086 | 20 | SRC                               |
| 1083 | 2086 | 20 | STAG2                             |
| 1083 | 2086 | 20 | STAT4                             |
| 1083 | 2086 | 20 | STK11                             |
| 1083 | 2086 | 20 | SUFU                              |
| 1083 | 2086 | 20 | SYK                               |
| 1083 | 2086 | 20 | TBX3                              |
| 1083 | 2086 | 20 | TET2                              |
| 1083 | 2086 | 20 | TGFBR2                            |
| 1083 | 2086 | 20 | TIPARP                            |
| 1083 | 2086 | 20 | TMPRSS2                           |
| 1083 | 2086 | 20 | TNFAIP3                           |
| 1083 | 2086 | 20 | TNFRSF14                          |
| 1083 | 2086 | 20 | TOP1                              |
| 1083 | 2086 | 20 | TP53                              |
| 1083 | 2086 | 20 | TRRAP                             |
| 1083 | 2086 | 20 | Tuberous sclerosis complex 1 gene |
| 1083 | 2086 | 20 | Tuberous sclerosis complex 2 gene |
| 1083 | 2086 | 20 | TSHR                              |
| 1083 | 2086 | 20 | Von Hippel-Lindau                 |
| 1083 | 2086 | 20 | WISP3                             |

|      |      |    |         |
|------|------|----|---------|
| 1083 | 2086 | 20 | WT1     |
| 1083 | 2086 | 20 | XPO1    |
| 1083 | 2086 | 20 | XRCC3   |
| 1083 | 2086 | 20 | ZNF217  |
| 1083 | 2086 | 20 | ZNF703  |
| 1094 | 2097 | 30 | ABL1    |
| 1094 | 2097 | 30 | AKT1    |
| 1094 | 2097 | 30 | AKT2    |
| 1094 | 2097 | 30 | AKT3    |
| 1094 | 2097 | 30 | ALK     |
| 1094 | 2097 | 30 | ALOX12B |
| 1094 | 2097 | 30 | APC     |
| 1094 | 2097 | 30 | APCDD1  |
| 1094 | 2097 | 30 | AR      |
| 1094 | 2097 | 30 | ARAF    |
| 1094 | 2097 | 30 | ARFRP1  |
| 1094 | 2097 | 30 | ARID1A  |
| 1094 | 2097 | 30 | ARID2   |
| 1094 | 2097 | 30 | ASXL1   |
| 1094 | 2097 | 30 | ATM     |
| 1094 | 2097 | 30 | ATR     |
| 1094 | 2097 | 30 | ATRX    |
| 1094 | 2097 | 30 | AURKA   |
| 1094 | 2097 | 30 | AURKB   |
| 1094 | 2097 | 30 | AXL     |
| 1094 | 2097 | 30 | BACH1   |
| 1094 | 2097 | 30 | BAP1    |
| 1094 | 2097 | 30 | BARD1   |
| 1094 | 2097 | 30 | BCL-2   |
| 1094 | 2097 | 30 | BCL2L2  |
| 1094 | 2097 | 30 | BCL6    |
| 1094 | 2097 | 30 | BCOR    |
| 1094 | 2097 | 30 | BCORL1  |
| 1094 | 2097 | 30 | BCR     |
| 1094 | 2097 | 30 | BLM     |
| 1094 | 2097 | 30 | BRAF    |
| 1094 | 2097 | 30 | BRCA1   |
| 1094 | 2097 | 30 | BRCA2   |
| 1094 | 2097 | 30 | BRIP1   |
| 1094 | 2097 | 30 | BTG1    |

|      |      |    |                                       |
|------|------|----|---------------------------------------|
| 1094 | 2097 | 30 | BTK                                   |
| 1094 | 2097 | 30 | C17orf39                              |
| 1094 | 2097 | 30 | CARD11                                |
| 1094 | 2097 | 30 | CASP8                                 |
| 1094 | 2097 | 30 | CBFB                                  |
| 1094 | 2097 | 30 | CBL                                   |
| 1094 | 2097 | 30 | CCND2                                 |
| 1094 | 2097 | 30 | CCND3                                 |
| 1094 | 2097 | 30 | CCNE1                                 |
| 1094 | 2097 | 30 | CD79A                                 |
| 1094 | 2097 | 30 | CD79B                                 |
| 1094 | 2097 | 30 | CDC73                                 |
| 1094 | 2097 | 30 | CDH1                                  |
| 1094 | 2097 | 30 | CDK12                                 |
| 1094 | 2097 | 30 | Cyclin dependent kinase-4             |
| 1094 | 2097 | 30 | CDK6                                  |
| 1094 | 2097 | 30 | CDK8                                  |
| 1094 | 2097 | 30 | CDKN1B                                |
| 1094 | 2097 | 30 | CDKN2A                                |
| 1094 | 2097 | 30 | CDKN2B                                |
| 1094 | 2097 | 30 | CDKN2C                                |
| 1094 | 2097 | 30 | CCAT/enhancer binding protein (CEBPA) |
| 1094 | 2097 | 30 | CHEK1                                 |
| 1094 | 2097 | 30 | CHEK2                                 |
| 1094 | 2097 | 30 | CHUK                                  |
| 1094 | 2097 | 30 | CIC                                   |
| 1094 | 2097 | 30 | CRBN                                  |
| 1094 | 2097 | 30 | CREBBP                                |
| 1094 | 2097 | 30 | CRKL                                  |
| 1094 | 2097 | 30 | CRLF2                                 |
| 1094 | 2097 | 30 | CSF1R                                 |
| 1094 | 2097 | 30 | CTCF                                  |
| 1094 | 2097 | 30 | CTNNA1                                |
| 1094 | 2097 | 30 | CTNNB1                                |
| 1094 | 2097 | 30 | CUL4A                                 |
| 1094 | 2097 | 30 | CUL4B                                 |
| 1094 | 2097 | 30 | CYP17A1                               |
| 1094 | 2097 | 30 | DAXX                                  |
| 1094 | 2097 | 30 | DDR2                                  |
| 1094 | 2097 | 30 | DIS3                                  |



|      |      |    |                                  |
|------|------|----|----------------------------------|
| 1094 | 2097 | 30 | DNMT3A                           |
| 1094 | 2097 | 30 | DOT1L                            |
| 1094 | 2097 | 30 | Epidermal Growth Factor Receptor |
| 1094 | 2097 | 30 | EMSY                             |
| 1094 | 2097 | 30 | EP300                            |
| 1094 | 2097 | 30 | EPHA3                            |
| 1094 | 2097 | 30 | EPHA5                            |
| 1094 | 2097 | 30 | EPHB1                            |
| 1094 | 2097 | 30 | ERBB2                            |
| 1094 | 2097 | 30 | ERBB3                            |
| 1094 | 2097 | 30 | ERBB4                            |
| 1094 | 2097 | 30 | ERG                              |
| 1094 | 2097 | 30 | Estrogen receptor 1              |
| 1094 | 2097 | 30 | ETV1                             |
| 1094 | 2097 | 30 | ETV4                             |
| 1094 | 2097 | 30 | ETV5                             |
| 1094 | 2097 | 30 | ETV6                             |
| 1094 | 2097 | 30 | EWSR1                            |
| 1094 | 2097 | 30 | EZH2                             |
| 1094 | 2097 | 30 | FAM123B(WTX)                     |
| 1094 | 2097 | 30 | FAM46C                           |
| 1094 | 2097 | 30 | FANCA                            |
| 1094 | 2097 | 30 | FANCC                            |
| 1094 | 2097 | 30 | FANCD2                           |
| 1094 | 2097 | 30 | FANCE                            |
| 1094 | 2097 | 30 | FANCF                            |
| 1094 | 2097 | 30 | FANCG                            |
| 1094 | 2097 | 30 | FANCI                            |
| 1094 | 2097 | 30 | FANCL                            |
| 1094 | 2097 | 30 | FANCM                            |
| 1094 | 2097 | 30 | FAT3                             |
| 1094 | 2097 | 30 | FBXW7                            |
| 1094 | 2097 | 30 | FGF10                            |
| 1094 | 2097 | 30 | FGF12                            |
| 1094 | 2097 | 30 | FGF14                            |
| 1094 | 2097 | 30 | Fibroblast growth factor 19      |
| 1094 | 2097 | 30 | Fibroblast growth factor 23      |
| 1094 | 2097 | 30 | Fibroblast growth factor 3       |
| 1094 | 2097 | 30 | FGF4                             |
| 1094 | 2097 | 30 | FGF6                             |

|      |      |    |                                                  |
|------|------|----|--------------------------------------------------|
| 1094 | 2097 | 30 | FGF7                                             |
| 1094 | 2097 | 30 | Fibroblast growth receptor 1                     |
| 1094 | 2097 | 30 | Fibroblast growth receptor 2                     |
| 1094 | 2097 | 30 | Fibroblast growth receptor 3                     |
| 1094 | 2097 | 30 | Fibroblast growth receptor 4                     |
| 1094 | 2097 | 30 | FLT1                                             |
| 1094 | 2097 | 30 | Fms-like tyrosine kinase 3 (FLT3)                |
| 1094 | 2097 | 30 | FLT4                                             |
| 1094 | 2097 | 30 | FOXL2                                            |
| 1094 | 2097 | 30 | GATA1                                            |
| 1094 | 2097 | 30 | GATA2                                            |
| 1094 | 2097 | 30 | GATA3                                            |
| 1094 | 2097 | 30 | GNA11                                            |
| 1094 | 2097 | 30 | GNA13                                            |
| 1094 | 2097 | 30 | GNAQ                                             |
| 1094 | 2097 | 30 | GNAS                                             |
| 1094 | 2097 | 30 | GPR124                                           |
| 1094 | 2097 | 30 | GRIN2A                                           |
| 1094 | 2097 | 30 | GSK3B                                            |
| 1094 | 2097 | 30 | Hepatocyte growth factor                         |
| 1094 | 2097 | 30 | HLA-A                                            |
| 1094 | 2097 | 30 | HRAS                                             |
| 1094 | 2097 | 30 | IDH1                                             |
| 1094 | 2097 | 30 | IDH2                                             |
| 1094 | 2097 | 30 | Insulin-like growth factor 1                     |
| 1094 | 2097 | 30 | Insulin growth factor 1 receptor                 |
| 1094 | 2097 | 30 | Insulin-like growth factor 2, also somatomedin A |
| 1094 | 2097 | 30 | IKBKE                                            |
| 1094 | 2097 | 30 | IKZF1                                            |
| 1094 | 2097 | 30 | IL7R                                             |
| 1094 | 2097 | 30 | INHBA                                            |
| 1094 | 2097 | 30 | IRF4                                             |
| 1094 | 2097 | 30 | IRS2                                             |
| 1094 | 2097 | 30 | JAK1                                             |
| 1094 | 2097 | 30 | JAK2                                             |
| 1094 | 2097 | 30 | JAK3                                             |
| 1094 | 2097 | 30 | JUN                                              |
| 1094 | 2097 | 30 | KDM5A                                            |
| 1094 | 2097 | 30 | KDM5C                                            |
| 1094 | 2097 | 30 | KDM6A                                            |

|      |      |    |                                                |
|------|------|----|------------------------------------------------|
| 1094 | 2097 | 30 | KDR                                            |
| 1094 | 2097 | 30 | KEAP1                                          |
| 1094 | 2097 | 30 | KIT                                            |
| 1094 | 2097 | 30 | KLHL6                                          |
| 1094 | 2097 | 30 | KRAS                                           |
| 1094 | 2097 | 30 | LMO1                                           |
| 1094 | 2097 | 30 | LRP1B                                          |
| 1094 | 2097 | 30 | MAP2K1                                         |
| 1094 | 2097 | 30 | MAP2K2                                         |
| 1094 | 2097 | 30 | MAP2K4                                         |
| 1094 | 2097 | 30 | MAP3K1                                         |
| 1094 | 2097 | 30 | MAP3K13                                        |
| 1094 | 2097 | 30 | MCL1                                           |
| 1094 | 2097 | 30 | MDM2                                           |
| 1094 | 2097 | 30 | MDM4                                           |
| 1094 | 2097 | 30 | MED12                                          |
| 1094 | 2097 | 30 | MEF2B                                          |
| 1094 | 2097 | 30 | MEN1                                           |
| 1094 | 2097 | 30 | MET                                            |
| 1094 | 2097 | 30 | Microphthalmia associated transcription factor |
| 1094 | 2097 | 30 | MLH1                                           |
| 1094 | 2097 | 30 | MLL                                            |
| 1094 | 2097 | 30 | MLL2                                           |
| 1094 | 2097 | 30 | MPL                                            |
| 1094 | 2097 | 30 | MRE11A                                         |
| 1094 | 2097 | 30 | MSH2                                           |
| 1094 | 2097 | 30 | MSH6                                           |
| 1094 | 2097 | 30 | MTOR                                           |
| 1094 | 2097 | 30 | MUTYH                                          |
| 1094 | 2097 | 30 | MYC                                            |
| 1094 | 2097 | 30 | MYCL1                                          |
| 1094 | 2097 | 30 | MYCN                                           |
| 1094 | 2097 | 30 | MYD88                                          |
| 1094 | 2097 | 30 | MYST3                                          |
| 1094 | 2097 | 30 | NBN                                            |
| 1094 | 2097 | 30 | NCOR1                                          |
| 1094 | 2097 | 30 | NF1                                            |
| 1094 | 2097 | 30 | NF2                                            |
| 1094 | 2097 | 30 | NFE2L2                                         |
| 1094 | 2097 | 30 | NFKBIA                                         |

|      |      |    |                                |
|------|------|----|--------------------------------|
| 1094 | 2097 | 30 | NKX2-1                         |
| 1094 | 2097 | 30 | NOTCH1                         |
| 1094 | 2097 | 30 | NOTCH2                         |
| 1094 | 2097 | 30 | NOTCH3                         |
| 1094 | 2097 | 30 | NOTCH4                         |
| 1094 | 2097 | 30 | Nucleophosmin (NPM1)           |
| 1094 | 2097 | 30 | NRAS                           |
| 1094 | 2097 | 30 | NSD1                           |
| 1094 | 2097 | 30 | NTRK1                          |
| 1094 | 2097 | 30 | NTRK2                          |
| 1094 | 2097 | 30 | NTRK3                          |
| 1094 | 2097 | 30 | NUP93                          |
| 1094 | 2097 | 30 | PAK3                           |
| 1094 | 2097 | 30 | PAK7                           |
| 1094 | 2097 | 30 | PALB2                          |
| 1094 | 2097 | 30 | PARP1                          |
| 1094 | 2097 | 30 | PARP2                          |
| 1094 | 2097 | 30 | PARP3                          |
| 1094 | 2097 | 30 | PARP4                          |
| 1094 | 2097 | 30 | PAX5                           |
| 1094 | 2097 | 30 | PBRM1                          |
| 1094 | 2097 | 30 | PDGFRA                         |
| 1094 | 2097 | 30 | PDGFRB                         |
| 1094 | 2097 | 30 | PDK1                           |
| 1094 | 2097 | 30 | PIK3C2G                        |
| 1094 | 2097 | 30 | PIK3C3                         |
| 1094 | 2097 | 30 | <i>PIK3CA</i>                  |
| 1094 | 2097 | 30 | PIK3CG                         |
| 1094 | 2097 | 30 | PIK3R1                         |
| 1094 | 2097 | 30 | PIK3R2                         |
| 1094 | 2097 | 30 | PMS2                           |
| 1094 | 2097 | 30 | PNRC1                          |
| 1094 | 2097 | 30 | PPP2R1A                        |
| 1094 | 2097 | 30 | PRDM1                          |
| 1094 | 2097 | 30 | PRKAR1A                        |
| 1094 | 2097 | 30 | PRKDC                          |
| 1094 | 2097 | 30 | PRSS8                          |
| 1094 | 2097 | 30 | PTCH1                          |
| 1094 | 2097 | 30 | Phosphatase and Tensin homolog |
| 1094 | 2097 | 30 | PTPN11                         |

|      |      |    |             |
|------|------|----|-------------|
| 1094 | 2097 | 30 | RAD50       |
| 1094 | 2097 | 30 | RAD51       |
| 1094 | 2097 | 30 | RAD51B      |
| 1094 | 2097 | 30 | RAD51C      |
| 1094 | 2097 | 30 | RAD51D      |
| 1094 | 2097 | 30 | RAD52       |
| 1094 | 2097 | 30 | RAD54L      |
| 1094 | 2097 | 30 | RAF1        |
| 1094 | 2097 | 30 | RARA        |
| 1094 | 2097 | 30 | 13q14(RB1)V |
| 1094 | 2097 | 30 | REL         |
| 1094 | 2097 | 30 | RET         |
| 1094 | 2097 | 30 | RICTOR      |
| 1094 | 2097 | 30 | RNF43       |
| 1094 | 2097 | 30 | ROS1        |
| 1094 | 2097 | 30 | RPA1        |
| 1094 | 2097 | 30 | RPTOR       |
| 1094 | 2097 | 30 | RUNX1       |
| 1094 | 2097 | 30 | RUNX1T1     |
| 1094 | 2097 | 30 | SETD2       |
| 1094 | 2097 | 30 | SF3B1       |
| 1094 | 2097 | 30 | SH2B3       |
| 1094 | 2097 | 30 | SMAD2       |
| 1094 | 2097 | 30 | SMAD4       |
| 1094 | 2097 | 30 | SMARCA4     |
| 1094 | 2097 | 30 | SMARCB1     |
| 1094 | 2097 | 30 | SMARCD1     |
| 1094 | 2097 | 30 | SMO         |
| 1094 | 2097 | 30 | SOCS1       |
| 1094 | 2097 | 30 | SOX10       |
| 1094 | 2097 | 30 | SOX2        |
| 1094 | 2097 | 30 | SPEN        |
| 1094 | 2097 | 30 | SPOP        |
| 1094 | 2097 | 30 | SRC         |
| 1094 | 2097 | 30 | STAG2       |
| 1094 | 2097 | 30 | STAT4       |
| 1094 | 2097 | 30 | STK11       |
| 1094 | 2097 | 30 | SUFU        |
| 1094 | 2097 | 30 | SYK         |
| 1094 | 2097 | 30 | TBX3        |

|      |      |    |                                   |
|------|------|----|-----------------------------------|
| 1094 | 2097 | 30 | TET2                              |
| 1094 | 2097 | 30 | TGFBR2                            |
| 1094 | 2097 | 30 | TIPARP                            |
| 1094 | 2097 | 30 | TMPRSS2                           |
| 1094 | 2097 | 30 | TNFAIP3                           |
| 1094 | 2097 | 30 | TNFRSF14                          |
| 1094 | 2097 | 30 | TOP1                              |
| 1094 | 2097 | 30 | TP53                              |
| 1094 | 2097 | 30 | TRRAP                             |
| 1094 | 2097 | 30 | Tuberous sclerosis complex 1 gene |
| 1094 | 2097 | 30 | Tuberous sclerosis complex 2 gene |
| 1094 | 2097 | 30 | TSHR                              |
| 1094 | 2097 | 30 | Von Hippel-Lindau                 |
| 1094 | 2097 | 30 | WISP3                             |
| 1094 | 2097 | 30 | WT1                               |
| 1094 | 2097 | 30 | XPO1                              |
| 1094 | 2097 | 30 | XRCC3                             |
| 1094 | 2097 | 30 | ZNF217                            |
| 1094 | 2097 | 30 | ZNF703                            |
| 1095 | 2098 | 60 | ABL1                              |
| 1095 | 2098 | 60 | ABL2                              |
| 1095 | 2098 | 60 | AKT1                              |
| 1095 | 2098 | 60 | AKT2                              |
| 1095 | 2098 | 60 | AKT3                              |
| 1095 | 2098 | 60 | ALK                               |
| 1095 | 2098 | 60 | APC                               |
| 1095 | 2098 | 60 | ARAF                              |
| 1095 | 2098 | 60 | ARFRP1                            |
| 1095 | 2098 | 60 | ARID1A                            |
| 1095 | 2098 | 60 | ATM                               |
| 1095 | 2098 | 60 | ATR                               |
| 1095 | 2098 | 60 | AURKB                             |
| 1095 | 2098 | 60 | BAP1                              |
| 1095 | 2098 | 60 | BCL-2                             |
| 1095 | 2098 | 60 | BCL2A1                            |
| 1095 | 2098 | 60 | BCL2L1                            |
| 1095 | 2098 | 60 | BCL2L2                            |
| 1095 | 2098 | 60 | BCL6                              |
| 1095 | 2098 | 60 | BCR                               |

|      |      |    |                                       |
|------|------|----|---------------------------------------|
| 1095 | 2098 | 60 | BRAF                                  |
| 1095 | 2098 | 60 | BRCA1                                 |
| 1095 | 2098 | 60 | BRCA2                                 |
| 1095 | 2098 | 60 | CARD11                                |
| 1095 | 2098 | 60 | CBL                                   |
| 1095 | 2098 | 60 | CCND2                                 |
| 1095 | 2098 | 60 | CCND3                                 |
| 1095 | 2098 | 60 | CCNE1                                 |
| 1095 | 2098 | 60 | CD79A                                 |
| 1095 | 2098 | 60 | CD79B                                 |
| 1095 | 2098 | 60 | CDH1                                  |
| 1095 | 2098 | 60 | CDH2                                  |
| 1095 | 2098 | 60 | CDH20                                 |
| 1095 | 2098 | 60 | CDH5                                  |
| 1095 | 2098 | 60 | Cyclin dependent kinase-4             |
| 1095 | 2098 | 60 | CDK6                                  |
| 1095 | 2098 | 60 | CDK8                                  |
| 1095 | 2098 | 60 | CDKN2A                                |
| 1095 | 2098 | 60 | CDKN2B                                |
| 1095 | 2098 | 60 | CDKN2C                                |
| 1095 | 2098 | 60 | CCAT/enhancer binding protein (CEBPA) |
| 1095 | 2098 | 60 | CHEK1                                 |
| 1095 | 2098 | 60 | CHEK2                                 |
| 1095 | 2098 | 60 | CRKL                                  |
| 1095 | 2098 | 60 | CRLF2                                 |
| 1095 | 2098 | 60 | CTNNB1                                |
| 1095 | 2098 | 60 | DDR2                                  |
| 1095 | 2098 | 60 | DNMT3A                                |
| 1095 | 2098 | 60 | DOT1L                                 |
| 1095 | 2098 | 60 | Epidermal Growth Factor Receptor      |
| 1095 | 2098 | 60 | EPHA3                                 |
| 1095 | 2098 | 60 | EPHA5                                 |
| 1095 | 2098 | 60 | EPHA6                                 |
| 1095 | 2098 | 60 | EPHA7                                 |
| 1095 | 2098 | 60 | EPHB1                                 |
| 1095 | 2098 | 60 | EPHB4                                 |
| 1095 | 2098 | 60 | EPHB6                                 |
| 1095 | 2098 | 60 | ERBB3                                 |
| 1095 | 2098 | 60 | ERBB4                                 |

|      |      |    |                                   |
|------|------|----|-----------------------------------|
| 1095 | 2098 | 60 | ERCC2                             |
| 1095 | 2098 | 60 | ERG                               |
| 1095 | 2098 | 60 | Estrogen receptor 1               |
| 1095 | 2098 | 60 | ETV1                              |
| 1095 | 2098 | 60 | ETV4                              |
| 1095 | 2098 | 60 | ETV5                              |
| 1095 | 2098 | 60 | ETV6                              |
| 1095 | 2098 | 60 | EWSR1                             |
| 1095 | 2098 | 60 | EZH2                              |
| 1095 | 2098 | 60 | FANCA                             |
| 1095 | 2098 | 60 | FBXW7                             |
| 1095 | 2098 | 60 | Fibroblast growth receptor 1      |
| 1095 | 2098 | 60 | Fibroblast growth receptor 2      |
| 1095 | 2098 | 60 | Fibroblast growth receptor 3      |
| 1095 | 2098 | 60 | Fibroblast growth receptor 4      |
| 1095 | 2098 | 60 | FLT1                              |
| 1095 | 2098 | 60 | Fms-like tyrosine kinase 3 (FLT3) |
| 1095 | 2098 | 60 | FLT4                              |
| 1095 | 2098 | 60 | FOXP4                             |
| 1095 | 2098 | 60 | GATA1                             |
| 1095 | 2098 | 60 | GNA11                             |
| 1095 | 2098 | 60 | GNAQ                              |
| 1095 | 2098 | 60 | GNAS                              |
| 1095 | 2098 | 60 | GPR124                            |
| 1095 | 2098 | 60 | GUCY1A2                           |
| 1095 | 2098 | 60 | HOXA3                             |
| 1095 | 2098 | 60 | HRAS                              |
| 1095 | 2098 | 60 | HSP90AA1                          |
| 1095 | 2098 | 60 | IDH1                              |
| 1095 | 2098 | 60 | IDH2                              |
| 1095 | 2098 | 60 | Insulin growth factor 1 receptor  |
| 1095 | 2098 | 60 | IGF2R                             |
| 1095 | 2098 | 60 | IKBKE                             |
| 1095 | 2098 | 60 | IKZF1                             |
| 1095 | 2098 | 60 | INHBA                             |
| 1095 | 2098 | 60 | INSR                              |
| 1095 | 2098 | 60 | IRS2                              |
| 1095 | 2098 | 60 | JAK1                              |
| 1095 | 2098 | 60 | JAK2                              |
| 1095 | 2098 | 60 | JAK3                              |



|      |      |    |                                                |
|------|------|----|------------------------------------------------|
| 1095 | 2098 | 60 | JUN                                            |
| 1095 | 2098 | 60 | KDM6A                                          |
| 1095 | 2098 | 60 | KDR                                            |
| 1095 | 2098 | 60 | KIT                                            |
| 1095 | 2098 | 60 | KRAS                                           |
| 1095 | 2098 | 60 | LRP1B                                          |
| 1095 | 2098 | 60 | LRP6                                           |
| 1095 | 2098 | 60 | LTK                                            |
| 1095 | 2098 | 60 | MAP2K1                                         |
| 1095 | 2098 | 60 | MAP2K2                                         |
| 1095 | 2098 | 60 | MAP2K4                                         |
| 1095 | 2098 | 60 | MCL1                                           |
| 1095 | 2098 | 60 | MDM2                                           |
| 1095 | 2098 | 60 | MDM4                                           |
| 1095 | 2098 | 60 | MEN1                                           |
| 1095 | 2098 | 60 | MET                                            |
| 1095 | 2098 | 60 | Microphthalmia associated transcription factor |
| 1095 | 2098 | 60 | MLH1                                           |
| 1095 | 2098 | 60 | MLL                                            |
| 1095 | 2098 | 60 | MPL                                            |
| 1095 | 2098 | 60 | MRE11A                                         |
| 1095 | 2098 | 60 | MSH2                                           |
| 1095 | 2098 | 60 | MSH6                                           |
| 1095 | 2098 | 60 | MTOR                                           |
| 1095 | 2098 | 60 | MUTYH                                          |
| 1095 | 2098 | 60 | MYC                                            |
| 1095 | 2098 | 60 | MYCL1                                          |
| 1095 | 2098 | 60 | MYCN                                           |
| 1095 | 2098 | 60 | NF2                                            |
| 1095 | 2098 | 60 | NKX2-1                                         |
| 1095 | 2098 | 60 | NOTCH1                                         |
| 1095 | 2098 | 60 | Nucleophosmin (NPM1)                           |
| 1095 | 2098 | 60 | NRAS                                           |
| 1095 | 2098 | 60 | NTRK1                                          |
| 1095 | 2098 | 60 | NTRK2                                          |
| 1095 | 2098 | 60 | NTRK3                                          |
| 1095 | 2098 | 60 | PAK3                                           |
| 1095 | 2098 | 60 | PAX5                                           |
| 1095 | 2098 | 60 | PDGFRA                                         |
| 1095 | 2098 | 60 | PDGFRB                                         |

|      |      |    |                                   |
|------|------|----|-----------------------------------|
| 1095 | 2098 | 60 | PHLPP2                            |
| 1095 | 2098 | 60 | PIK3CG                            |
| 1095 | 2098 | 60 | PIK3R1                            |
| 1095 | 2098 | 60 | PKHD1                             |
| 1095 | 2098 | 60 | PLCG1                             |
| 1095 | 2098 | 60 | PRKDC                             |
| 1095 | 2098 | 60 | PTCH1                             |
| 1095 | 2098 | 60 | PTCH2                             |
| 1095 | 2098 | 60 | Phosphatase and Tensin homolog    |
| 1095 | 2098 | 60 | PTPN11                            |
| 1095 | 2098 | 60 | RAF1                              |
| 1095 | 2098 | 60 | RARA                              |
| 1095 | 2098 | 60 | 13q14(RB1)V                       |
| 1095 | 2098 | 60 | RET                               |
| 1095 | 2098 | 60 | RICTOR                            |
| 1095 | 2098 | 60 | RPTOR                             |
| 1095 | 2098 | 60 | RUNX1                             |
| 1095 | 2098 | 60 | SMAD2                             |
| 1095 | 2098 | 60 | SMAD3                             |
| 1095 | 2098 | 60 | SMAD4                             |
| 1095 | 2098 | 60 | SMARCA4                           |
| 1095 | 2098 | 60 | SMARCB1                           |
| 1095 | 2098 | 60 | SMO                               |
| 1095 | 2098 | 60 | SOX10                             |
| 1095 | 2098 | 60 | SOX2                              |
| 1095 | 2098 | 60 | SRC                               |
| 1095 | 2098 | 60 | STAT3                             |
| 1095 | 2098 | 60 | STK11                             |
| 1095 | 2098 | 60 | SUFU                              |
| 1095 | 2098 | 60 | TBX22                             |
| 1095 | 2098 | 60 | TET2                              |
| 1095 | 2098 | 60 | TGFBR2                            |
| 1095 | 2098 | 60 | TMPRSS2                           |
| 1095 | 2098 | 60 | TNFAIP3                           |
| 1095 | 2098 | 60 | TNKS                              |
| 1095 | 2098 | 60 | TNKS2                             |
| 1095 | 2098 | 60 | TOP1                              |
| 1095 | 2098 | 60 | TP53                              |
| 1095 | 2098 | 60 | Tuberous sclerosis complex 1 gene |
| 1095 | 2098 | 60 | USP9X                             |

|      |      |    |                                   |
|------|------|----|-----------------------------------|
| 1095 | 2098 | 60 | Von Hippel-Lindau                 |
| 1095 | 2098 | 60 | WT1                               |
| 1095 |      | 60 | AR                                |
| 1095 |      | 60 | Tuberous sclerosis complex 2 gene |
| 1096 | 2099 | 70 | ABL1                              |
| 1096 | 2099 | 70 | AKT1                              |
| 1096 | 2099 | 70 | AKT2                              |
| 1096 | 2099 | 70 | AKT3                              |
| 1096 | 2099 | 70 | ALK                               |
| 1096 | 2099 | 70 | ALOX12B                           |
| 1096 | 2099 | 70 | APC                               |
| 1096 | 2099 | 70 | APCDD1                            |
| 1096 | 2099 | 70 | AR                                |
| 1096 | 2099 | 70 | ARAF                              |
| 1096 | 2099 | 70 | ARFRP1                            |
| 1096 | 2099 | 70 | ARID1A                            |
| 1096 | 2099 | 70 | ARID2                             |
| 1096 | 2099 | 70 | ASXL1                             |
| 1096 | 2099 | 70 | ATM                               |
| 1096 | 2099 | 70 | ATR                               |
| 1096 | 2099 | 70 | ATRX                              |
| 1096 | 2099 | 70 | AURKA                             |
| 1096 | 2099 | 70 | AURKB                             |
| 1096 | 2099 | 70 | AXL                               |
| 1096 | 2099 | 70 | BACH1                             |
| 1096 | 2099 | 70 | BAP1                              |
| 1096 | 2099 | 70 | BARD1                             |
| 1096 | 2099 | 70 | BCL-2                             |
| 1096 | 2099 | 70 | BCL2L2                            |
| 1096 | 2099 | 70 | BCL6                              |
| 1096 | 2099 | 70 | BCOR                              |
| 1096 | 2099 | 70 | BCORL1                            |
| 1096 | 2099 | 70 | BCR                               |
| 1096 | 2099 | 70 | BLM                               |
| 1096 | 2099 | 70 | BRAF                              |
| 1096 | 2099 | 70 | BRCA1                             |
| 1096 | 2099 | 70 | BRCA2                             |
| 1096 | 2099 | 70 | BRIP1                             |
| 1096 | 2099 | 70 | BTG1                              |
| 1096 | 2099 | 70 | BTK                               |

|      |      |    |                                       |
|------|------|----|---------------------------------------|
| 1096 | 2099 | 70 | C17orf39                              |
| 1096 | 2099 | 70 | CARD11                                |
| 1096 | 2099 | 70 | CASP8                                 |
| 1096 | 2099 | 70 | CBFB                                  |
| 1096 | 2099 | 70 | CBL                                   |
| 1096 | 2099 | 70 | CCND1                                 |
| 1096 | 2099 | 70 | CCND2                                 |
| 1096 | 2099 | 70 | CCND3                                 |
| 1096 | 2099 | 70 | CCNE1                                 |
| 1096 | 2099 | 70 | CD79A                                 |
| 1096 | 2099 | 70 | CD79B                                 |
| 1096 | 2099 | 70 | CDC73                                 |
| 1096 | 2099 | 70 | CDK12                                 |
| 1096 | 2099 | 70 | Cyclin dependent kinase-4             |
| 1096 | 2099 | 70 | CDK6                                  |
| 1096 | 2099 | 70 | CDK8                                  |
| 1096 | 2099 | 70 | CDKN1B                                |
| 1096 | 2099 | 70 | CDKN2A                                |
| 1096 | 2099 | 70 | CDKN2B                                |
| 1096 | 2099 | 70 | CDKN2C                                |
| 1096 | 2099 | 70 | CCAT/enhancer binding protein (CEBPA) |
| 1096 | 2099 | 70 | CHEK1                                 |
| 1096 | 2099 | 70 | CHEK2                                 |
| 1096 | 2099 | 70 | CHUK                                  |
| 1096 | 2099 | 70 | CIC                                   |
| 1096 | 2099 | 70 | CRBN                                  |
| 1096 | 2099 | 70 | CREBBP                                |
| 1096 | 2099 | 70 | CRKL                                  |
| 1096 | 2099 | 70 | CRLF2                                 |
| 1096 | 2099 | 70 | CSF1R                                 |
| 1096 | 2099 | 70 | CTCF                                  |
| 1096 | 2099 | 70 | CTNNA1                                |
| 1096 | 2099 | 70 | CTNNB1                                |
| 1096 | 2099 | 70 | CUL4A                                 |
| 1096 | 2099 | 70 | CUL4B                                 |
| 1096 | 2099 | 70 | CYP17A1                               |
| 1096 | 2099 | 70 | DAXX                                  |
| 1096 | 2099 | 70 | DDR2                                  |
| 1096 | 2099 | 70 | DIS3                                  |
| 1096 | 2099 | 70 | DNMT3A                                |

|      |      |    |                                  |
|------|------|----|----------------------------------|
| 1096 | 2099 | 70 | DOT1L                            |
| 1096 | 2099 | 70 | Epidermal Growth Factor Receptor |
| 1096 | 2099 | 70 | EMSY                             |
| 1096 | 2099 | 70 | EP300                            |
| 1096 | 2099 | 70 | EPHA3                            |
| 1096 | 2099 | 70 | EPHA5                            |
| 1096 | 2099 | 70 | EPHB1                            |
| 1096 | 2099 | 70 | ERBB2                            |
| 1096 | 2099 | 70 | ERBB3                            |
| 1096 | 2099 | 70 | ERBB4                            |
| 1096 | 2099 | 70 | ERG                              |
| 1096 | 2099 | 70 | Estrogen receptor 1              |
| 1096 | 2099 | 70 | ETV1                             |
| 1096 | 2099 | 70 | ETV4                             |
| 1096 | 2099 | 70 | ETV5                             |
| 1096 | 2099 | 70 | ETV6                             |
| 1096 | 2099 | 70 | EWSR1                            |
| 1096 | 2099 | 70 | EZH2                             |
| 1096 | 2099 | 70 | FAM123B(WTX)                     |
| 1096 | 2099 | 70 | FAM46C                           |
| 1096 | 2099 | 70 | FANCA                            |
| 1096 | 2099 | 70 | FANCC                            |
| 1096 | 2099 | 70 | FANCD2                           |
| 1096 | 2099 | 70 | FANCE                            |
| 1096 | 2099 | 70 | FANCF                            |
| 1096 | 2099 | 70 | FANCG                            |
| 1096 | 2099 | 70 | FANCI                            |
| 1096 | 2099 | 70 | FANCL                            |
| 1096 | 2099 | 70 | FANCM                            |
| 1096 | 2099 | 70 | FAT3                             |
| 1096 | 2099 | 70 | FBXW7                            |
| 1096 | 2099 | 70 | FGF10                            |
| 1096 | 2099 | 70 | FGF12                            |
| 1096 | 2099 | 70 | FGF14                            |
| 1096 | 2099 | 70 | Fibroblast growth factor 19      |
| 1096 | 2099 | 70 | Fibroblast growth factor 23      |
| 1096 | 2099 | 70 | Fibroblast growth factor 3       |
| 1096 | 2099 | 70 | FGF4                             |
| 1096 | 2099 | 70 | FGF6                             |
| 1096 | 2099 | 70 | FGF7                             |

|      |      |    |                                                  |
|------|------|----|--------------------------------------------------|
| 1096 | 2099 | 70 | Fibroblast growth receptor 1                     |
| 1096 | 2099 | 70 | Fibroblast growth receptor 2                     |
| 1096 | 2099 | 70 | Fibroblast growth receptor 3                     |
| 1096 | 2099 | 70 | Fibroblast growth receptor 4                     |
| 1096 | 2099 | 70 | FLT1                                             |
| 1096 | 2099 | 70 | Fms-like tyrosine kinase 3 (FLT3)                |
| 1096 | 2099 | 70 | FLT4                                             |
| 1096 | 2099 | 70 | FOXL2                                            |
| 1096 | 2099 | 70 | GATA1                                            |
| 1096 | 2099 | 70 | GATA2                                            |
| 1096 | 2099 | 70 | GATA3                                            |
| 1096 | 2099 | 70 | GNA11                                            |
| 1096 | 2099 | 70 | GNA13                                            |
| 1096 | 2099 | 70 | GNAQ                                             |
| 1096 | 2099 | 70 | GNAS                                             |
| 1096 | 2099 | 70 | GPR124                                           |
| 1096 | 2099 | 70 | GRIN2A                                           |
| 1096 | 2099 | 70 | GSK3B                                            |
| 1096 | 2099 | 70 | Hepatocyte growth factor                         |
| 1096 | 2099 | 70 | HLA-A                                            |
| 1096 | 2099 | 70 | HRAS                                             |
| 1096 | 2099 | 70 | IDH1                                             |
| 1096 | 2099 | 70 | IDH2                                             |
| 1096 | 2099 | 70 | Insulin-like growth factor 1                     |
| 1096 | 2099 | 70 | Insulin growth factor 1 receptor                 |
| 1096 | 2099 | 70 | Insulin-like growth factor 2, also somatomedin A |
| 1096 | 2099 | 70 | IKBKE                                            |
| 1096 | 2099 | 70 | IKZF1                                            |
| 1096 | 2099 | 70 | IL7R                                             |
| 1096 | 2099 | 70 | INHBA                                            |
| 1096 | 2099 | 70 | IRF4                                             |
| 1096 | 2099 | 70 | IRS2                                             |
| 1096 | 2099 | 70 | JAK1                                             |
| 1096 | 2099 | 70 | JAK2                                             |
| 1096 | 2099 | 70 | JAK3                                             |
| 1096 | 2099 | 70 | JUN                                              |
| 1096 | 2099 | 70 | KDM5A                                            |
| 1096 | 2099 | 70 | KDM5C                                            |
| 1096 | 2099 | 70 | KDM6A                                            |
| 1096 | 2099 | 70 | KDR                                              |

|      |      |    |                                                |
|------|------|----|------------------------------------------------|
| 1096 | 2099 | 70 | KEAP1                                          |
| 1096 | 2099 | 70 | KIT                                            |
| 1096 | 2099 | 70 | KLHL6                                          |
| 1096 | 2099 | 70 | LMO1                                           |
| 1096 | 2099 | 70 | LRP1B                                          |
| 1096 | 2099 | 70 | MAP2K1                                         |
| 1096 | 2099 | 70 | MAP2K2                                         |
| 1096 | 2099 | 70 | MAP2K4                                         |
| 1096 | 2099 | 70 | MAP3K1                                         |
| 1096 | 2099 | 70 | MAP3K13                                        |
| 1096 | 2099 | 70 | MDM2                                           |
| 1096 | 2099 | 70 | MDM4                                           |
| 1096 | 2099 | 70 | MED12                                          |
| 1096 | 2099 | 70 | MEF2B                                          |
| 1096 | 2099 | 70 | MEN1                                           |
| 1096 | 2099 | 70 | MET                                            |
| 1096 | 2099 | 70 | Microphthalmia associated transcription factor |
| 1096 | 2099 | 70 | MLH1                                           |
| 1096 | 2099 | 70 | MLL                                            |
| 1096 | 2099 | 70 | MLL2                                           |
| 1096 | 2099 | 70 | MPL                                            |
| 1096 | 2099 | 70 | MRE11A                                         |
| 1096 | 2099 | 70 | MSH2                                           |
| 1096 | 2099 | 70 | MSH6                                           |
| 1096 | 2099 | 70 | MTOR                                           |
| 1096 | 2099 | 70 | MUTYH                                          |
| 1096 | 2099 | 70 | MYC                                            |
| 1096 | 2099 | 70 | MYCL1                                          |
| 1096 | 2099 | 70 | MYCN                                           |
| 1096 | 2099 | 70 | MYD88                                          |
| 1096 | 2099 | 70 | MYST3                                          |
| 1096 | 2099 | 70 | NBN                                            |
| 1096 | 2099 | 70 | NCOR1                                          |
| 1096 | 2099 | 70 | NF1                                            |
| 1096 | 2099 | 70 | NF2                                            |
| 1096 | 2099 | 70 | NFKBIA                                         |
| 1096 | 2099 | 70 | NKX2-1                                         |
| 1096 | 2099 | 70 | NOTCH1                                         |
| 1096 | 2099 | 70 | NOTCH2                                         |
| 1096 | 2099 | 70 | NOTCH3                                         |

|      |      |    |                                |
|------|------|----|--------------------------------|
| 1096 | 2099 | 70 | NOTCH4                         |
| 1096 | 2099 | 70 | Nucleophosmin (NPM1)           |
| 1096 | 2099 | 70 | NRAS                           |
| 1096 | 2099 | 70 | NSD1                           |
| 1096 | 2099 | 70 | NTRK1                          |
| 1096 | 2099 | 70 | NTRK2                          |
| 1096 | 2099 | 70 | NTRK3                          |
| 1096 | 2099 | 70 | NUP93                          |
| 1096 | 2099 | 70 | PAK3                           |
| 1096 | 2099 | 70 | PAK7                           |
| 1096 | 2099 | 70 | PALB2                          |
| 1096 | 2099 | 70 | PARP1                          |
| 1096 | 2099 | 70 | PARP2                          |
| 1096 | 2099 | 70 | PARP3                          |
| 1096 | 2099 | 70 | PARP4                          |
| 1096 | 2099 | 70 | PAX5                           |
| 1096 | 2099 | 70 | PBRM1                          |
| 1096 | 2099 | 70 | PDGFRA                         |
| 1096 | 2099 | 70 | PDGFRB                         |
| 1096 | 2099 | 70 | PKD1                           |
| 1096 | 2099 | 70 | PIK3C2G                        |
| 1096 | 2099 | 70 | PIK3C3                         |
| 1096 | 2099 | 70 | PIK3CG                         |
| 1096 | 2099 | 70 | PIK3R1                         |
| 1096 | 2099 | 70 | PIK3R2                         |
| 1096 | 2099 | 70 | PMS2                           |
| 1096 | 2099 | 70 | PNRC1                          |
| 1096 | 2099 | 70 | PPP2R1A                        |
| 1096 | 2099 | 70 | PRDM1                          |
| 1096 | 2099 | 70 | PRKAR1A                        |
| 1096 | 2099 | 70 | PRKDC                          |
| 1096 | 2099 | 70 | PRSS8                          |
| 1096 | 2099 | 70 | PTCH1                          |
| 1096 | 2099 | 70 | Phosphatase and Tensin homolog |
| 1096 | 2099 | 70 | PTPN11                         |
| 1096 | 2099 | 70 | RAD50                          |
| 1096 | 2099 | 70 | RAD51                          |
| 1096 | 2099 | 70 | RAD51B                         |
| 1096 | 2099 | 70 | RAD51C                         |
| 1096 | 2099 | 70 | RAD51D                         |



|      |      |    |             |
|------|------|----|-------------|
| 1096 | 2099 | 70 | RAD52       |
| 1096 | 2099 | 70 | RAD54L      |
| 1096 | 2099 | 70 | RAF1        |
| 1096 | 2099 | 70 | RARA        |
| 1096 | 2099 | 70 | 13q14(RB1)V |
| 1096 | 2099 | 70 | REL         |
| 1096 | 2099 | 70 | RET         |
| 1096 | 2099 | 70 | RICTOR      |
| 1096 | 2099 | 70 | RNF43       |
| 1096 | 2099 | 70 | ROS1        |
| 1096 | 2099 | 70 | RPA1        |
| 1096 | 2099 | 70 | RPTOR       |
| 1096 | 2099 | 70 | RUNX1       |
| 1096 | 2099 | 70 | RUNX1T1     |
| 1096 | 2099 | 70 | SETD2       |
| 1096 | 2099 | 70 | SF3B1       |
| 1096 | 2099 | 70 | SH2B3       |
| 1096 | 2099 | 70 | SMAD2       |
| 1096 | 2099 | 70 | SMAD4       |
| 1096 | 2099 | 70 | SMARCA4     |
| 1096 | 2099 | 70 | SMARCB1     |
| 1096 | 2099 | 70 | SMARCD1     |
| 1096 | 2099 | 70 | SMO         |
| 1096 | 2099 | 70 | SOCS1       |
| 1096 | 2099 | 70 | SOX10       |
| 1096 | 2099 | 70 | SOX2        |
| 1096 | 2099 | 70 | SPEN        |
| 1096 | 2099 | 70 | SPOP        |
| 1096 | 2099 | 70 | SRC         |
| 1096 | 2099 | 70 | STAG2       |
| 1096 | 2099 | 70 | STAT4       |
| 1096 | 2099 | 70 | STK11       |
| 1096 | 2099 | 70 | SUFU        |
| 1096 | 2099 | 70 | SYK         |
| 1096 | 2099 | 70 | TET2        |
| 1096 | 2099 | 70 | TGFBR2      |
| 1096 | 2099 | 70 | TIPARP      |
| 1096 | 2099 | 70 | TMPRSS2     |
| 1096 | 2099 | 70 | TNFAIP3     |
| 1096 | 2099 | 70 | TNFRSF14    |

|      |      |    |                                   |
|------|------|----|-----------------------------------|
| 1096 | 2099 | 70 | TOP1                              |
| 1096 | 2099 | 70 | TP53                              |
| 1096 | 2099 | 70 | TRRAP                             |
| 1096 | 2099 | 70 | Tuberous sclerosis complex 1 gene |
| 1096 | 2099 | 70 | Tuberous sclerosis complex 2 gene |
| 1096 | 2099 | 70 | TSHR                              |
| 1096 | 2099 | 70 | Von Hippel-Lindau                 |
| 1096 | 2099 | 70 | WISP3                             |
| 1096 | 2099 | 70 | WT1                               |
| 1096 | 2099 | 70 | XPO1                              |
| 1096 | 2099 | 70 | XRCC3                             |
| 1096 | 2099 | 70 | ZNF217                            |
| 1096 | 2099 | 70 | ZNF703                            |
| 1097 | 2100 | 60 | ABL1                              |
| 1097 | 2100 | 60 | AKT1                              |
| 1097 | 2100 | 60 | AKT2                              |
| 1097 | 2100 | 60 | AKT3                              |
| 1097 | 2100 | 60 | ALK                               |
| 1097 | 2100 | 60 | ALOX12B                           |
| 1097 | 2100 | 60 | APC                               |
| 1097 | 2100 | 60 | APCDD1                            |
| 1097 | 2100 | 60 | AR                                |
| 1097 | 2100 | 60 | ARAF                              |
| 1097 | 2100 | 60 | ARFRP1                            |
| 1097 | 2100 | 60 | ARID1A                            |
| 1097 | 2100 | 60 | ARID2                             |
| 1097 | 2100 | 60 | ASXL1                             |
| 1097 | 2100 | 60 | ATM                               |
| 1097 | 2100 | 60 | ATR                               |
| 1097 | 2100 | 60 | ATRX                              |
| 1097 | 2100 | 60 | AURKA                             |
| 1097 | 2100 | 60 | AURKB                             |
| 1097 | 2100 | 60 | AXL                               |
| 1097 | 2100 | 60 | BACH1                             |
| 1097 | 2100 | 60 | BAP1                              |
| 1097 | 2100 | 60 | BARD1                             |
| 1097 | 2100 | 60 | BCL-2                             |
| 1097 | 2100 | 60 | BCL2L2                            |
| 1097 | 2100 | 60 | BCL6                              |

|      |      |    |                                       |
|------|------|----|---------------------------------------|
| 1097 | 2100 | 60 | BCOR                                  |
| 1097 | 2100 | 60 | BCORL1                                |
| 1097 | 2100 | 60 | BCR                                   |
| 1097 | 2100 | 60 | BLM                                   |
| 1097 | 2100 | 60 | BRAF                                  |
| 1097 | 2100 | 60 | BRCA1                                 |
| 1097 | 2100 | 60 | BRCA2                                 |
| 1097 | 2100 | 60 | BRIP1                                 |
| 1097 | 2100 | 60 | BTG1                                  |
| 1097 | 2100 | 60 | BTK                                   |
| 1097 | 2100 | 60 | C17orf39                              |
| 1097 | 2100 | 60 | CARD11                                |
| 1097 | 2100 | 60 | CASP8                                 |
| 1097 | 2100 | 60 | CBFB                                  |
| 1097 | 2100 | 60 | CBL                                   |
| 1097 | 2100 | 60 | CCND1                                 |
| 1097 | 2100 | 60 | CCND2                                 |
| 1097 | 2100 | 60 | CCND3                                 |
| 1097 | 2100 | 60 | CCNE1                                 |
| 1097 | 2100 | 60 | CD79A                                 |
| 1097 | 2100 | 60 | CD79B                                 |
| 1097 | 2100 | 60 | CDC73                                 |
| 1097 | 2100 | 60 | CDH1                                  |
| 1097 | 2100 | 60 | CDK12                                 |
| 1097 | 2100 | 60 | Cyclin dependent kinase-4             |
| 1097 | 2100 | 60 | CDK6                                  |
| 1097 | 2100 | 60 | CDK8                                  |
| 1097 | 2100 | 60 | CDKN1B                                |
| 1097 | 2100 | 60 | CDKN2A                                |
| 1097 | 2100 | 60 | CDKN2B                                |
| 1097 | 2100 | 60 | CDKN2C                                |
| 1097 | 2100 | 60 | CCAT/enhancer binding protein (CEBPA) |
| 1097 | 2100 | 60 | CHEK1                                 |
| 1097 | 2100 | 60 | CHEK2                                 |
| 1097 | 2100 | 60 | CHUK                                  |
| 1097 | 2100 | 60 | CIC                                   |
| 1097 | 2100 | 60 | CRBN                                  |
| 1097 | 2100 | 60 | CREBBP                                |
| 1097 | 2100 | 60 | CRKL                                  |
| 1097 | 2100 | 60 | CRLF2                                 |

|      |      |    |                                  |
|------|------|----|----------------------------------|
| 1097 | 2100 | 60 | CSF1R                            |
| 1097 | 2100 | 60 | CTCF                             |
| 1097 | 2100 | 60 | CTNNA1                           |
| 1097 | 2100 | 60 | CTNNB1                           |
| 1097 | 2100 | 60 | CUL4A                            |
| 1097 | 2100 | 60 | CUL4B                            |
| 1097 | 2100 | 60 | CYP17A1                          |
| 1097 | 2100 | 60 | DAXX                             |
| 1097 | 2100 | 60 | DDR2                             |
| 1097 | 2100 | 60 | DIS3                             |
| 1097 | 2100 | 60 | DNMT3A                           |
| 1097 | 2100 | 60 | DOT1L                            |
| 1097 | 2100 | 60 | Epidermal Growth Factor Receptor |
| 1097 | 2100 | 60 | EMSY                             |
| 1097 | 2100 | 60 | EP300                            |
| 1097 | 2100 | 60 | EPHA3                            |
| 1097 | 2100 | 60 | EPHA5                            |
| 1097 | 2100 | 60 | EPHB1                            |
| 1097 | 2100 | 60 | ERBB2                            |
| 1097 | 2100 | 60 | ERBB3                            |
| 1097 | 2100 | 60 | ERBB4                            |
| 1097 | 2100 | 60 | ERG                              |
| 1097 | 2100 | 60 | Estrogen receptor 1              |
| 1097 | 2100 | 60 | ETV1                             |
| 1097 | 2100 | 60 | ETV4                             |
| 1097 | 2100 | 60 | ETV5                             |
| 1097 | 2100 | 60 | ETV6                             |
| 1097 | 2100 | 60 | EWSR1                            |
| 1097 | 2100 | 60 | EZH2                             |
| 1097 | 2100 | 60 | FAM123B(WTX)                     |
| 1097 | 2100 | 60 | FAM46C                           |
| 1097 | 2100 | 60 | FANCA                            |
| 1097 | 2100 | 60 | FANCC                            |
| 1097 | 2100 | 60 | FANCD2                           |
| 1097 | 2100 | 60 | FANCE                            |
| 1097 | 2100 | 60 | FANCF                            |
| 1097 | 2100 | 60 | FANCG                            |
| 1097 | 2100 | 60 | FANCI                            |
| 1097 | 2100 | 60 | FANCL                            |
| 1097 | 2100 | 60 | FANCM                            |

|      |      |    |                                                  |
|------|------|----|--------------------------------------------------|
| 1097 | 2100 | 60 | FAT3                                             |
| 1097 | 2100 | 60 | FBXW7                                            |
| 1097 | 2100 | 60 | FGF10                                            |
| 1097 | 2100 | 60 | FGF12                                            |
| 1097 | 2100 | 60 | FGF14                                            |
| 1097 | 2100 | 60 | Fibroblast growth factor 19                      |
| 1097 | 2100 | 60 | Fibroblast growth factor 23                      |
| 1097 | 2100 | 60 | Fibroblast growth factor 3                       |
| 1097 | 2100 | 60 | FGF4                                             |
| 1097 | 2100 | 60 | FGF6                                             |
| 1097 | 2100 | 60 | FGF7                                             |
| 1097 | 2100 | 60 | Fibroblast growth receptor 2                     |
| 1097 | 2100 | 60 | Fibroblast growth receptor 3                     |
| 1097 | 2100 | 60 | Fibroblast growth receptor 4                     |
| 1097 | 2100 | 60 | FLT1                                             |
| 1097 | 2100 | 60 | Fms-like tyrosine kinase 3 (FLT3)                |
| 1097 | 2100 | 60 | FLT4                                             |
| 1097 | 2100 | 60 | FOXL2                                            |
| 1097 | 2100 | 60 | GATA1                                            |
| 1097 | 2100 | 60 | GATA2                                            |
| 1097 | 2100 | 60 | GATA3                                            |
| 1097 | 2100 | 60 | GNA11                                            |
| 1097 | 2100 | 60 | GNA13                                            |
| 1097 | 2100 | 60 | GNAQ                                             |
| 1097 | 2100 | 60 | GNAS                                             |
| 1097 | 2100 | 60 | GPR124                                           |
| 1097 | 2100 | 60 | GRIN2A                                           |
| 1097 | 2100 | 60 | GSK3B                                            |
| 1097 | 2100 | 60 | Hepatocyte growth factor                         |
| 1097 | 2100 | 60 | HLA-A                                            |
| 1097 | 2100 | 60 | HRAS                                             |
| 1097 | 2100 | 60 | IDH1                                             |
| 1097 | 2100 | 60 | IDH2                                             |
| 1097 | 2100 | 60 | Insulin-like growth factor 1                     |
| 1097 | 2100 | 60 | Insulin growth factor 1 receptor                 |
| 1097 | 2100 | 60 | Insulin-like growth factor 2, also somatomedin A |
| 1097 | 2100 | 60 | IKBKE                                            |
| 1097 | 2100 | 60 | IKZF1                                            |
| 1097 | 2100 | 60 | IL7R                                             |
| 1097 | 2100 | 60 | INHBA                                            |

|      |      |    |                                                |
|------|------|----|------------------------------------------------|
| 1097 | 2100 | 60 | IRF4                                           |
| 1097 | 2100 | 60 | IRS2                                           |
| 1097 | 2100 | 60 | JAK1                                           |
| 1097 | 2100 | 60 | JAK2                                           |
| 1097 | 2100 | 60 | JAK3                                           |
| 1097 | 2100 | 60 | JUN                                            |
| 1097 | 2100 | 60 | KDM5A                                          |
| 1097 | 2100 | 60 | KDM5C                                          |
| 1097 | 2100 | 60 | KDM6A                                          |
| 1097 | 2100 | 60 | KDR                                            |
| 1097 | 2100 | 60 | KEAP1                                          |
| 1097 | 2100 | 60 | KIT                                            |
| 1097 | 2100 | 60 | KLHL6                                          |
| 1097 | 2100 | 60 | KRAS                                           |
| 1097 | 2100 | 60 | LMO1                                           |
| 1097 | 2100 | 60 | LRP1B                                          |
| 1097 | 2100 | 60 | MAP2K1                                         |
| 1097 | 2100 | 60 | MAP2K2                                         |
| 1097 | 2100 | 60 | MAP3K1                                         |
| 1097 | 2100 | 60 | MAP3K13                                        |
| 1097 | 2100 | 60 | MCL1                                           |
| 1097 | 2100 | 60 | MDM2                                           |
| 1097 | 2100 | 60 | MDM4                                           |
| 1097 | 2100 | 60 | MED12                                          |
| 1097 | 2100 | 60 | MEF2B                                          |
| 1097 | 2100 | 60 | MEN1                                           |
| 1097 | 2100 | 60 | MET                                            |
| 1097 | 2100 | 60 | Microphthalmia associated transcription factor |
| 1097 | 2100 | 60 | MLH1                                           |
| 1097 | 2100 | 60 | MLL                                            |
| 1097 | 2100 | 60 | MLL2                                           |
| 1097 | 2100 | 60 | MPL                                            |
| 1097 | 2100 | 60 | MRE11A                                         |
| 1097 | 2100 | 60 | MSH2                                           |
| 1097 | 2100 | 60 | MSH6                                           |
| 1097 | 2100 | 60 | MTOR                                           |
| 1097 | 2100 | 60 | MUTYH                                          |
| 1097 | 2100 | 60 | MYC                                            |
| 1097 | 2100 | 60 | MYCL1                                          |
| 1097 | 2100 | 60 | MYCN                                           |

|      |      |    |                      |
|------|------|----|----------------------|
| 1097 | 2100 | 60 | MYD88                |
| 1097 | 2100 | 60 | NBN                  |
| 1097 | 2100 | 60 | NCOR1                |
| 1097 | 2100 | 60 | NF1                  |
| 1097 | 2100 | 60 | NF2                  |
| 1097 | 2100 | 60 | NFE2L2               |
| 1097 | 2100 | 60 | NFKBIA               |
| 1097 | 2100 | 60 | NKX2-1               |
| 1097 | 2100 | 60 | NOTCH1               |
| 1097 | 2100 | 60 | NOTCH2               |
| 1097 | 2100 | 60 | NOTCH3               |
| 1097 | 2100 | 60 | NOTCH4               |
| 1097 | 2100 | 60 | Nucleophosmin (NPM1) |
| 1097 | 2100 | 60 | NRAS                 |
| 1097 | 2100 | 60 | NSD1                 |
| 1097 | 2100 | 60 | NTRK1                |
| 1097 | 2100 | 60 | NTRK2                |
| 1097 | 2100 | 60 | NTRK3                |
| 1097 | 2100 | 60 | NUP93                |
| 1097 | 2100 | 60 | PAK3                 |
| 1097 | 2100 | 60 | PAK7                 |
| 1097 | 2100 | 60 | PALB2                |
| 1097 | 2100 | 60 | PARP1                |
| 1097 | 2100 | 60 | PARP2                |
| 1097 | 2100 | 60 | PARP3                |
| 1097 | 2100 | 60 | PARP4                |
| 1097 | 2100 | 60 | PAX5                 |
| 1097 | 2100 | 60 | PBRM1                |
| 1097 | 2100 | 60 | PDGFRA               |
| 1097 | 2100 | 60 | PDGFRB               |
| 1097 | 2100 | 60 | PDK1                 |
| 1097 | 2100 | 60 | PIK3C2G              |
| 1097 | 2100 | 60 | PIK3C3               |
| 1097 | 2100 | 60 | PIK3CG               |
| 1097 | 2100 | 60 | PIK3R1               |
| 1097 | 2100 | 60 | PIK3R2               |
| 1097 | 2100 | 60 | PMS2                 |
| 1097 | 2100 | 60 | PNRC1                |
| 1097 | 2100 | 60 | PPP2R1A              |
| 1097 | 2100 | 60 | PRDM1                |

|      |      |    |                                |
|------|------|----|--------------------------------|
| 1097 | 2100 | 60 | PRKAR1A                        |
| 1097 | 2100 | 60 | PRKDC                          |
| 1097 | 2100 | 60 | PRSS8                          |
| 1097 | 2100 | 60 | PTCH1                          |
| 1097 | 2100 | 60 | Phosphatase and Tensin homolog |
| 1097 | 2100 | 60 | PTPN11                         |
| 1097 | 2100 | 60 | RAD50                          |
| 1097 | 2100 | 60 | RAD51                          |
| 1097 | 2100 | 60 | RAD51B                         |
| 1097 | 2100 | 60 | RAD51C                         |
| 1097 | 2100 | 60 | RAD51D                         |
| 1097 | 2100 | 60 | RAD52                          |
| 1097 | 2100 | 60 | RAD54L                         |
| 1097 | 2100 | 60 | RAF1                           |
| 1097 | 2100 | 60 | RARA                           |
| 1097 | 2100 | 60 | REL                            |
| 1097 | 2100 | 60 | RET                            |
| 1097 | 2100 | 60 | RICTOR                         |
| 1097 | 2100 | 60 | RNF43                          |
| 1097 | 2100 | 60 | ROS1                           |
| 1097 | 2100 | 60 | RPA1                           |
| 1097 | 2100 | 60 | RPTOR                          |
| 1097 | 2100 | 60 | RUNX1                          |
| 1097 | 2100 | 60 | RUNX1T1                        |
| 1097 | 2100 | 60 | SETD2                          |
| 1097 | 2100 | 60 | SF3B1                          |
| 1097 | 2100 | 60 | SH2B3                          |
| 1097 | 2100 | 60 | SMAD2                          |
| 1097 | 2100 | 60 | SMAD4                          |
| 1097 | 2100 | 60 | SMARCA4                        |
| 1097 | 2100 | 60 | SMARCB1                        |
| 1097 | 2100 | 60 | SMARCD1                        |
| 1097 | 2100 | 60 | SMO                            |
| 1097 | 2100 | 60 | SOCS1                          |
| 1097 | 2100 | 60 | SOX10                          |
| 1097 | 2100 | 60 | SOX2                           |
| 1097 | 2100 | 60 | SPEN                           |
| 1097 | 2100 | 60 | SPOP                           |
| 1097 | 2100 | 60 | SRC                            |
| 1097 | 2100 | 60 | STAG2                          |



|      |      |    |                                   |
|------|------|----|-----------------------------------|
| 1097 | 2100 | 60 | STAT4                             |
| 1097 | 2100 | 60 | STK11                             |
| 1097 | 2100 | 60 | SUFU                              |
| 1097 | 2100 | 60 | SYK                               |
| 1097 | 2100 | 60 | TBX3                              |
| 1097 | 2100 | 60 | TET2                              |
| 1097 | 2100 | 60 | TGFBR2                            |
| 1097 | 2100 | 60 | TIPARP                            |
| 1097 | 2100 | 60 | TMPRSS2                           |
| 1097 | 2100 | 60 | TNFAIP3                           |
| 1097 | 2100 | 60 | TNFRSF14                          |
| 1097 | 2100 | 60 | TOP1                              |
| 1097 | 2100 | 60 | TP53                              |
| 1097 | 2100 | 60 | TRRAP                             |
| 1097 | 2100 | 60 | Tuberous sclerosis complex 1 gene |
| 1097 | 2100 | 60 | Tuberous sclerosis complex 2 gene |
| 1097 | 2100 | 60 | TSHR                              |
| 1097 | 2100 | 60 | Von Hippel-Lindau                 |
| 1097 | 2100 | 60 | WISP3                             |
| 1097 | 2100 | 60 | WT1                               |
| 1097 | 2100 | 60 | XPO1                              |
| 1097 | 2100 | 60 | XRCC3                             |
| 1097 | 2100 | 60 | ZNF217                            |
| 1098 | 2101 | 20 | ABL1                              |
| 1098 | 2101 | 20 | AKT1                              |
| 1098 | 2101 | 20 | AKT2                              |
| 1098 | 2101 | 20 | AKT3                              |
| 1098 | 2101 | 20 | ALK                               |
| 1098 | 2101 | 20 | ALOX12B                           |
| 1098 | 2101 | 20 | APC                               |
| 1098 | 2101 | 20 | APCDD1                            |
| 1098 | 2101 | 20 | AR                                |
| 1098 | 2101 | 20 | ARAF                              |
| 1098 | 2101 | 20 | ARFRP1                            |
| 1098 | 2101 | 20 | ARID2                             |
| 1098 | 2101 | 20 | ASXL1                             |
| 1098 | 2101 | 20 | ATM                               |
| 1098 | 2101 | 20 | ATR                               |
| 1098 | 2101 | 20 | ATRX                              |

|      |      |    |                                       |
|------|------|----|---------------------------------------|
| 1098 | 2101 | 20 | AURKA                                 |
| 1098 | 2101 | 20 | AURKB                                 |
| 1098 | 2101 | 20 | AXL                                   |
| 1098 | 2101 | 20 | BACH1                                 |
| 1098 | 2101 | 20 | BAP1                                  |
| 1098 | 2101 | 20 | BARD1                                 |
| 1098 | 2101 | 20 | BCL-2                                 |
| 1098 | 2101 | 20 | BCL2L2                                |
| 1098 | 2101 | 20 | BCL6                                  |
| 1098 | 2101 | 20 | BCOR                                  |
| 1098 | 2101 | 20 | BCORL1                                |
| 1098 | 2101 | 20 | BCR                                   |
| 1098 | 2101 | 20 | BLM                                   |
| 1098 | 2101 | 20 | BRAF                                  |
| 1098 | 2101 | 20 | BRCA1                                 |
| 1098 | 2101 | 20 | BRCA2                                 |
| 1098 | 2101 | 20 | BRIP1                                 |
| 1098 | 2101 | 20 | BTG1                                  |
| 1098 | 2101 | 20 | BTK                                   |
| 1098 | 2101 | 20 | C17orf39                              |
| 1098 | 2101 | 20 | CARD11                                |
| 1098 | 2101 | 20 | CASP8                                 |
| 1098 | 2101 | 20 | CBFB                                  |
| 1098 | 2101 | 20 | CBL                                   |
| 1098 | 2101 | 20 | CCND2                                 |
| 1098 | 2101 | 20 | CCND3                                 |
| 1098 | 2101 | 20 | CCNE1                                 |
| 1098 | 2101 | 20 | CD79A                                 |
| 1098 | 2101 | 20 | CD79B                                 |
| 1098 | 2101 | 20 | CDC73                                 |
| 1098 | 2101 | 20 | CDH1                                  |
| 1098 | 2101 | 20 | CDK12                                 |
| 1098 | 2101 | 20 | Cyclin dependent kinase-4             |
| 1098 | 2101 | 20 | CDK6                                  |
| 1098 | 2101 | 20 | CDK8                                  |
| 1098 | 2101 | 20 | CDKN1B                                |
| 1098 | 2101 | 20 | CDKN2A                                |
| 1098 | 2101 | 20 | CDKN2B                                |
| 1098 | 2101 | 20 | CDKN2C                                |
| 1098 | 2101 | 20 | CCAT/enhancer binding protein (CEBPA) |

|      |      |    |                                  |
|------|------|----|----------------------------------|
| 1098 | 2101 | 20 | CHEK1                            |
| 1098 | 2101 | 20 | CHEK2                            |
| 1098 | 2101 | 20 | CHUK                             |
| 1098 | 2101 | 20 | CIC                              |
| 1098 | 2101 | 20 | CRBN                             |
| 1098 | 2101 | 20 | CREBBP                           |
| 1098 | 2101 | 20 | CRKL                             |
| 1098 | 2101 | 20 | CRLF2                            |
| 1098 | 2101 | 20 | CSF1R                            |
| 1098 | 2101 | 20 | CTCF                             |
| 1098 | 2101 | 20 | CTNNA1                           |
| 1098 | 2101 | 20 | CTNNB1                           |
| 1098 | 2101 | 20 | CUL4A                            |
| 1098 | 2101 | 20 | CUL4B                            |
| 1098 | 2101 | 20 | CYP17A1                          |
| 1098 | 2101 | 20 | DAXX                             |
| 1098 | 2101 | 20 | DDR2                             |
| 1098 | 2101 | 20 | DIS3                             |
| 1098 | 2101 | 20 | DNMT3A                           |
| 1098 | 2101 | 20 | DOT1L                            |
| 1098 | 2101 | 20 | Epidermal Growth Factor Receptor |
| 1098 | 2101 | 20 | EP300                            |
| 1098 | 2101 | 20 | EPHA3                            |
| 1098 | 2101 | 20 | EPHA5                            |
| 1098 | 2101 | 20 | EPHB1                            |
| 1098 | 2101 | 20 | ERBB2                            |
| 1098 | 2101 | 20 | ERBB3                            |
| 1098 | 2101 | 20 | ERBB4                            |
| 1098 | 2101 | 20 | ERG                              |
| 1098 | 2101 | 20 | Estrogen receptor 1              |
| 1098 | 2101 | 20 | ETV1                             |
| 1098 | 2101 | 20 | ETV4                             |
| 1098 | 2101 | 20 | ETV5                             |
| 1098 | 2101 | 20 | ETV6                             |
| 1098 | 2101 | 20 | EWSR1                            |
| 1098 | 2101 | 20 | EZH2                             |
| 1098 | 2101 | 20 | FAM123B(WTX)                     |
| 1098 | 2101 | 20 | FAM46C                           |
| 1098 | 2101 | 20 | FANCA                            |
| 1098 | 2101 | 20 | FANCC                            |

|      |      |    |                                   |
|------|------|----|-----------------------------------|
| 1098 | 2101 | 20 | FANCD2                            |
| 1098 | 2101 | 20 | FANCE                             |
| 1098 | 2101 | 20 | FANCF                             |
| 1098 | 2101 | 20 | FANCG                             |
| 1098 | 2101 | 20 | FANCI                             |
| 1098 | 2101 | 20 | FANCL                             |
| 1098 | 2101 | 20 | FANCM                             |
| 1098 | 2101 | 20 | FAT3                              |
| 1098 | 2101 | 20 | FBXW7                             |
| 1098 | 2101 | 20 | FGF10                             |
| 1098 | 2101 | 20 | FGF12                             |
| 1098 | 2101 | 20 | FGF14                             |
| 1098 | 2101 | 20 | Fibroblast growth factor 19       |
| 1098 | 2101 | 20 | Fibroblast growth factor 23       |
| 1098 | 2101 | 20 | Fibroblast growth factor 3        |
| 1098 | 2101 | 20 | FGF4                              |
| 1098 | 2101 | 20 | FGF6                              |
| 1098 | 2101 | 20 | FGF7                              |
| 1098 | 2101 | 20 | Fibroblast growth receptor 2      |
| 1098 | 2101 | 20 | Fibroblast growth receptor 3      |
| 1098 | 2101 | 20 | Fibroblast growth receptor 4      |
| 1098 | 2101 | 20 | FLT1                              |
| 1098 | 2101 | 20 | Fms-like tyrosine kinase 3 (FLT3) |
| 1098 | 2101 | 20 | FLT4                              |
| 1098 | 2101 | 20 | FOXL2                             |
| 1098 | 2101 | 20 | GATA1                             |
| 1098 | 2101 | 20 | GATA2                             |
| 1098 | 2101 | 20 | GATA3                             |
| 1098 | 2101 | 20 | GNA11                             |
| 1098 | 2101 | 20 | GNA13                             |
| 1098 | 2101 | 20 | GNAQ                              |
| 1098 | 2101 | 20 | GNAS                              |
| 1098 | 2101 | 20 | GPR124                            |
| 1098 | 2101 | 20 | GRIN2A                            |
| 1098 | 2101 | 20 | GSK3B                             |
| 1098 | 2101 | 20 | Hepatocyte growth factor          |
| 1098 | 2101 | 20 | HLA-A                             |
| 1098 | 2101 | 20 | HRAS                              |
| 1098 | 2101 | 20 | IDH1                              |
| 1098 | 2101 | 20 | IDH2                              |

|      |      |    |                                                  |
|------|------|----|--------------------------------------------------|
| 1098 | 2101 | 20 | Insulin-like growth factor 1                     |
| 1098 | 2101 | 20 | Insulin growth factor 1 receptor                 |
| 1098 | 2101 | 20 | Insulin-like growth factor 2, also somatomedin A |
| 1098 | 2101 | 20 | IKBKE                                            |
| 1098 | 2101 | 20 | IKZF1                                            |
| 1098 | 2101 | 20 | IL7R                                             |
| 1098 | 2101 | 20 | INHBA                                            |
| 1098 | 2101 | 20 | IRF4                                             |
| 1098 | 2101 | 20 | IRS2                                             |
| 1098 | 2101 | 20 | JAK1                                             |
| 1098 | 2101 | 20 | JAK2                                             |
| 1098 | 2101 | 20 | JAK3                                             |
| 1098 | 2101 | 20 | JUN                                              |
| 1098 | 2101 | 20 | KDM5A                                            |
| 1098 | 2101 | 20 | KDM5C                                            |
| 1098 | 2101 | 20 | KDM6A                                            |
| 1098 | 2101 | 20 | KDR                                              |
| 1098 | 2101 | 20 | KEAP1                                            |
| 1098 | 2101 | 20 | KIT                                              |
| 1098 | 2101 | 20 | KLHL6                                            |
| 1098 | 2101 | 20 | KRAS                                             |
| 1098 | 2101 | 20 | LMO1                                             |
| 1098 | 2101 | 20 | LRP1B                                            |
| 1098 | 2101 | 20 | MAP2K1                                           |
| 1098 | 2101 | 20 | MAP2K2                                           |
| 1098 | 2101 | 20 | MAP2K4                                           |
| 1098 | 2101 | 20 | MAP3K1                                           |
| 1098 | 2101 | 20 | MAP3K13                                          |
| 1098 | 2101 | 20 | MCL1                                             |
| 1098 | 2101 | 20 | MDM2                                             |
| 1098 | 2101 | 20 | MDM4                                             |
| 1098 | 2101 | 20 | MED12                                            |
| 1098 | 2101 | 20 | MEF2B                                            |
| 1098 | 2101 | 20 | MEN1                                             |
| 1098 | 2101 | 20 | MET                                              |
| 1098 | 2101 | 20 | Microphthalmia associated transcription factor   |
| 1098 | 2101 | 20 | MLH1                                             |
| 1098 | 2101 | 20 | MLL                                              |
| 1098 | 2101 | 20 | MLL2                                             |

|      |      |    |                      |
|------|------|----|----------------------|
| 1098 | 2101 | 20 | MPL                  |
| 1098 | 2101 | 20 | MRE11A               |
| 1098 | 2101 | 20 | MSH2                 |
| 1098 | 2101 | 20 | MSH6                 |
| 1098 | 2101 | 20 | MTOR                 |
| 1098 | 2101 | 20 | MUTYH                |
| 1098 | 2101 | 20 | MYCL1                |
| 1098 | 2101 | 20 | MYCN                 |
| 1098 | 2101 | 20 | MYD88                |
| 1098 | 2101 | 20 | NBN                  |
| 1098 | 2101 | 20 | NCOR1                |
| 1098 | 2101 | 20 | NF1                  |
| 1098 | 2101 | 20 | NF2                  |
| 1098 | 2101 | 20 | NFE2L2               |
| 1098 | 2101 | 20 | NFKBIA               |
| 1098 | 2101 | 20 | NKX2-1               |
| 1098 | 2101 | 20 | NOTCH1               |
| 1098 | 2101 | 20 | NOTCH2               |
| 1098 | 2101 | 20 | NOTCH3               |
| 1098 | 2101 | 20 | NOTCH4               |
| 1098 | 2101 | 20 | Nucleophosmin (NPM1) |
| 1098 | 2101 | 20 | NRAS                 |
| 1098 | 2101 | 20 | NSD1                 |
| 1098 | 2101 | 20 | NTRK1                |
| 1098 | 2101 | 20 | NTRK2                |
| 1098 | 2101 | 20 | NTRK3                |
| 1098 | 2101 | 20 | NUP93                |
| 1098 | 2101 | 20 | PAK3                 |
| 1098 | 2101 | 20 | PAK7                 |
| 1098 | 2101 | 20 | PALB2                |
| 1098 | 2101 | 20 | PARP1                |
| 1098 | 2101 | 20 | PARP2                |
| 1098 | 2101 | 20 | PARP3                |
| 1098 | 2101 | 20 | PARP4                |
| 1098 | 2101 | 20 | PAX5                 |
| 1098 | 2101 | 20 | PBRM1                |
| 1098 | 2101 | 20 | PDGFRA               |
| 1098 | 2101 | 20 | PDGFRB               |
| 1098 | 2101 | 20 | PDK1                 |
| 1098 | 2101 | 20 | PIK3C2G              |

|      |      |    |                                |
|------|------|----|--------------------------------|
| 1098 | 2101 | 20 | PIK3C3                         |
| 1098 | 2101 | 20 | PIK3CG                         |
| 1098 | 2101 | 20 | PIK3R1                         |
| 1098 | 2101 | 20 | PIK3R2                         |
| 1098 | 2101 | 20 | PMS2                           |
| 1098 | 2101 | 20 | PNRC1                          |
| 1098 | 2101 | 20 | PPP2R1A                        |
| 1098 | 2101 | 20 | PRDM1                          |
| 1098 | 2101 | 20 | PRKAR1A                        |
| 1098 | 2101 | 20 | PRKDC                          |
| 1098 | 2101 | 20 | PRSS8                          |
| 1098 | 2101 | 20 | PTCH1                          |
| 1098 | 2101 | 20 | Phosphatase and Tensin homolog |
| 1098 | 2101 | 20 | PTPN11                         |
| 1098 | 2101 | 20 | RAD50                          |
| 1098 | 2101 | 20 | RAD51                          |
| 1098 | 2101 | 20 | RAD51B                         |
| 1098 | 2101 | 20 | RAD51C                         |
| 1098 | 2101 | 20 | RAD51D                         |
| 1098 | 2101 | 20 | RAD52                          |
| 1098 | 2101 | 20 | RAD54L                         |
| 1098 | 2101 | 20 | RAF1                           |
| 1098 | 2101 | 20 | RARA                           |
| 1098 | 2101 | 20 | 13q14(RB1)V                    |
| 1098 | 2101 | 20 | REL                            |
| 1098 | 2101 | 20 | RET                            |
| 1098 | 2101 | 20 | RICTOR                         |
| 1098 | 2101 | 20 | RNF43                          |
| 1098 | 2101 | 20 | ROS1                           |
| 1098 | 2101 | 20 | RPA1                           |
| 1098 | 2101 | 20 | RPTOR                          |
| 1098 | 2101 | 20 | RUNX1                          |
| 1098 | 2101 | 20 | RUNX1T1                        |
| 1098 | 2101 | 20 | SETD2                          |
| 1098 | 2101 | 20 | SF3B1                          |
| 1098 | 2101 | 20 | SH2B3                          |
| 1098 | 2101 | 20 | SMAD2                          |
| 1098 | 2101 | 20 | SMAD4                          |
| 1098 | 2101 | 20 | SMARCB1                        |
| 1098 | 2101 | 20 | SMARCD1                        |

|      |      |    |                                   |
|------|------|----|-----------------------------------|
| 1098 | 2101 | 20 | SMO                               |
| 1098 | 2101 | 20 | SOCS1                             |
| 1098 | 2101 | 20 | SOX10                             |
| 1098 | 2101 | 20 | SOX2                              |
| 1098 | 2101 | 20 | SPEN                              |
| 1098 | 2101 | 20 | SPOP                              |
| 1098 | 2101 | 20 | SRC                               |
| 1098 | 2101 | 20 | STAG2                             |
| 1098 | 2101 | 20 | STAT4                             |
| 1098 | 2101 | 20 | STK11                             |
| 1098 | 2101 | 20 | SUFU                              |
| 1098 | 2101 | 20 | SYK                               |
| 1098 | 2101 | 20 | TBX3                              |
| 1098 | 2101 | 20 | TET2                              |
| 1098 | 2101 | 20 | TGFBR2                            |
| 1098 | 2101 | 20 | TIPARP                            |
| 1098 | 2101 | 20 | TMPRSS2                           |
| 1098 | 2101 | 20 | TNFAIP3                           |
| 1098 | 2101 | 20 | TNFRSF14                          |
| 1098 | 2101 | 20 | TOP1                              |
| 1098 | 2101 | 20 | TP53                              |
| 1098 | 2101 | 20 | TRRAP                             |
| 1098 | 2101 | 20 | Tuberous sclerosis complex 1 gene |
| 1098 | 2101 | 20 | Tuberous sclerosis complex 2 gene |
| 1098 | 2101 | 20 | TSHR                              |
| 1098 | 2101 | 20 | Von Hippel-Lindau                 |
| 1098 | 2101 | 20 | WISP3                             |
| 1098 | 2101 | 20 | WT1                               |
| 1098 | 2101 | 20 | XPO1                              |
| 1098 | 2101 | 20 | XRCC3                             |
| 1098 | 2101 | 20 | ZNF217                            |
| 1101 | 2104 | 40 | ABL1                              |
| 1101 | 2104 | 40 | AKT1                              |
| 1101 | 2104 | 40 | AKT2                              |
| 1101 | 2104 | 40 | AKT3                              |
| 1101 | 2104 | 40 | ALK                               |
| 1101 | 2104 | 40 | ALOX12B                           |
| 1101 | 2104 | 40 | APC                               |
| 1101 | 2104 | 40 | APCDD1                            |



|      |      |    |          |
|------|------|----|----------|
| 1101 | 2104 | 40 | AR       |
| 1101 | 2104 | 40 | ARAF     |
| 1101 | 2104 | 40 | ARFRP1   |
| 1101 | 2104 | 40 | ARID1A   |
| 1101 | 2104 | 40 | ARID2    |
| 1101 | 2104 | 40 | ASXL1    |
| 1101 | 2104 | 40 | ATM      |
| 1101 | 2104 | 40 | ATR      |
| 1101 | 2104 | 40 | ATRX     |
| 1101 | 2104 | 40 | AURKA    |
| 1101 | 2104 | 40 | AURKB    |
| 1101 | 2104 | 40 | AXL      |
| 1101 | 2104 | 40 | BACH1    |
| 1101 | 2104 | 40 | BAP1     |
| 1101 | 2104 | 40 | BARD1    |
| 1101 | 2104 | 40 | BCL-2    |
| 1101 | 2104 | 40 | BCL2L2   |
| 1101 | 2104 | 40 | BCL6     |
| 1101 | 2104 | 40 | BCOR     |
| 1101 | 2104 | 40 | BCORL1   |
| 1101 | 2104 | 40 | BCR      |
| 1101 | 2104 | 40 | BLM      |
| 1101 | 2104 | 40 | BRAF     |
| 1101 | 2104 | 40 | BRCA1    |
| 1101 | 2104 | 40 | BRCA2    |
| 1101 | 2104 | 40 | BRIP1    |
| 1101 | 2104 | 40 | BTG1     |
| 1101 | 2104 | 40 | BTK      |
| 1101 | 2104 | 40 | C17orf39 |
| 1101 | 2104 | 40 | CARD11   |
| 1101 | 2104 | 40 | CASP8    |
| 1101 | 2104 | 40 | CBFB     |
| 1101 | 2104 | 40 | CBL      |
| 1101 | 2104 | 40 | CCND1    |
| 1101 | 2104 | 40 | CCND2    |
| 1101 | 2104 | 40 | CCND3    |
| 1101 | 2104 | 40 | CCNE1    |
| 1101 | 2104 | 40 | CD79A    |
| 1101 | 2104 | 40 | CD79B    |
| 1101 | 2104 | 40 | CDC73    |

|      |      |    |                                       |
|------|------|----|---------------------------------------|
| 1101 | 2104 | 40 | CDK12                                 |
| 1101 | 2104 | 40 | Cyclin dependent kinase-4             |
| 1101 | 2104 | 40 | CDK6                                  |
| 1101 | 2104 | 40 | CDK8                                  |
| 1101 | 2104 | 40 | CDKN1B                                |
| 1101 | 2104 | 40 | CDKN2A                                |
| 1101 | 2104 | 40 | CDKN2B                                |
| 1101 | 2104 | 40 | CDKN2C                                |
| 1101 | 2104 | 40 | CCAT/enhancer binding protein (CEBPA) |
| 1101 | 2104 | 40 | CHEK1                                 |
| 1101 | 2104 | 40 | CHEK2                                 |
| 1101 | 2104 | 40 | CHUK                                  |
| 1101 | 2104 | 40 | CIC                                   |
| 1101 | 2104 | 40 | CRBN                                  |
| 1101 | 2104 | 40 | CREBBP                                |
| 1101 | 2104 | 40 | CRKL                                  |
| 1101 | 2104 | 40 | CRLF2                                 |
| 1101 | 2104 | 40 | CSF1R                                 |
| 1101 | 2104 | 40 | CTCF                                  |
| 1101 | 2104 | 40 | CTNNA1                                |
| 1101 | 2104 | 40 | CTNNB1                                |
| 1101 | 2104 | 40 | CUL4A                                 |
| 1101 | 2104 | 40 | CUL4B                                 |
| 1101 | 2104 | 40 | CYP17A1                               |
| 1101 | 2104 | 40 | DAXX                                  |
| 1101 | 2104 | 40 | DDR2                                  |
| 1101 | 2104 | 40 | DIS3                                  |
| 1101 | 2104 | 40 | DNMT3A                                |
| 1101 | 2104 | 40 | DOT1L                                 |
| 1101 | 2104 | 40 | Epidermal Growth Factor Receptor      |
| 1101 | 2104 | 40 | EMSY                                  |
| 1101 | 2104 | 40 | EP300                                 |
| 1101 | 2104 | 40 | EPHA3                                 |
| 1101 | 2104 | 40 | EPHA5                                 |
| 1101 | 2104 | 40 | EPHB1                                 |
| 1101 | 2104 | 40 | ERBB2                                 |
| 1101 | 2104 | 40 | ERBB3                                 |
| 1101 | 2104 | 40 | ERBB4                                 |
| 1101 | 2104 | 40 | ERG                                   |

|      |      |    |                                   |
|------|------|----|-----------------------------------|
| 1101 | 2104 | 40 | Estrogen receptor 1               |
| 1101 | 2104 | 40 | ETV1                              |
| 1101 | 2104 | 40 | ETV4                              |
| 1101 | 2104 | 40 | ETV5                              |
| 1101 | 2104 | 40 | ETV6                              |
| 1101 | 2104 | 40 | EWSR1                             |
| 1101 | 2104 | 40 | EZH2                              |
| 1101 | 2104 | 40 | FAM123B(WTX)                      |
| 1101 | 2104 | 40 | FAM46C                            |
| 1101 | 2104 | 40 | FANCA                             |
| 1101 | 2104 | 40 | FANCC                             |
| 1101 | 2104 | 40 | FANCD2                            |
| 1101 | 2104 | 40 | FANCE                             |
| 1101 | 2104 | 40 | FANCF                             |
| 1101 | 2104 | 40 | FANCG                             |
| 1101 | 2104 | 40 | FANCI                             |
| 1101 | 2104 | 40 | FANCL                             |
| 1101 | 2104 | 40 | FANCM                             |
| 1101 | 2104 | 40 | FAT3                              |
| 1101 | 2104 | 40 | FBXW7                             |
| 1101 | 2104 | 40 | FGF10                             |
| 1101 | 2104 | 40 | FGF12                             |
| 1101 | 2104 | 40 | FGF14                             |
| 1101 | 2104 | 40 | Fibroblast growth factor 19       |
| 1101 | 2104 | 40 | Fibroblast growth factor 23       |
| 1101 | 2104 | 40 | Fibroblast growth factor 3        |
| 1101 | 2104 | 40 | FGF4                              |
| 1101 | 2104 | 40 | FGF6                              |
| 1101 | 2104 | 40 | FGF7                              |
| 1101 | 2104 | 40 | Fibroblast growth receptor 1      |
| 1101 | 2104 | 40 | Fibroblast growth receptor 2      |
| 1101 | 2104 | 40 | Fibroblast growth receptor 3      |
| 1101 | 2104 | 40 | Fibroblast growth receptor 4      |
| 1101 | 2104 | 40 | FLT1                              |
| 1101 | 2104 | 40 | Fms-like tyrosine kinase 3 (FLT3) |
| 1101 | 2104 | 40 | FLT4                              |
| 1101 | 2104 | 40 | FOXL2                             |
| 1101 | 2104 | 40 | GATA1                             |
| 1101 | 2104 | 40 | GATA2                             |
| 1101 | 2104 | 40 | GATA3                             |

|      |      |    |                                                  |
|------|------|----|--------------------------------------------------|
| 1101 | 2104 | 40 | GNA11                                            |
| 1101 | 2104 | 40 | GNA13                                            |
| 1101 | 2104 | 40 | GNAQ                                             |
| 1101 | 2104 | 40 | GNAS                                             |
| 1101 | 2104 | 40 | GPR124                                           |
| 1101 | 2104 | 40 | GRIN2A                                           |
| 1101 | 2104 | 40 | GSK3B                                            |
| 1101 | 2104 | 40 | Hepatocyte growth factor                         |
| 1101 | 2104 | 40 | HLA-A                                            |
| 1101 | 2104 | 40 | HRAS                                             |
| 1101 | 2104 | 40 | IDH1                                             |
| 1101 | 2104 | 40 | IDH2                                             |
| 1101 | 2104 | 40 | Insulin-like growth factor 1                     |
| 1101 | 2104 | 40 | Insulin growth factor 1 receptor                 |
| 1101 | 2104 | 40 | Insulin-like growth factor 2, also somatomedin A |
| 1101 | 2104 | 40 | IKBKE                                            |
| 1101 | 2104 | 40 | IKZF1                                            |
| 1101 | 2104 | 40 | IL7R                                             |
| 1101 | 2104 | 40 | INHBA                                            |
| 1101 | 2104 | 40 | IRF4                                             |
| 1101 | 2104 | 40 | IRS2                                             |
| 1101 | 2104 | 40 | JAK1                                             |
| 1101 | 2104 | 40 | JAK2                                             |
| 1101 | 2104 | 40 | JAK3                                             |
| 1101 | 2104 | 40 | JUN                                              |
| 1101 | 2104 | 40 | KDM5A                                            |
| 1101 | 2104 | 40 | KDM5C                                            |
| 1101 | 2104 | 40 | KDM6A                                            |
| 1101 | 2104 | 40 | KDR                                              |
| 1101 | 2104 | 40 | KEAP1                                            |
| 1101 | 2104 | 40 | KIT                                              |
| 1101 | 2104 | 40 | KLHL6                                            |
| 1101 | 2104 | 40 | KRAS                                             |
| 1101 | 2104 | 40 | LMO1                                             |
| 1101 | 2104 | 40 | LRP1B                                            |
| 1101 | 2104 | 40 | MAP2K1                                           |
| 1101 | 2104 | 40 | MAP2K2                                           |
| 1101 | 2104 | 40 | MAP3K1                                           |
| 1101 | 2104 | 40 | MAP3K13                                          |
| 1101 | 2104 | 40 | MCL1                                             |

|      |      |    |                                                |
|------|------|----|------------------------------------------------|
| 1101 | 2104 | 40 | MDM2                                           |
| 1101 | 2104 | 40 | MDM4                                           |
| 1101 | 2104 | 40 | MED12                                          |
| 1101 | 2104 | 40 | MEF2B                                          |
| 1101 | 2104 | 40 | MEN1                                           |
| 1101 | 2104 | 40 | MET                                            |
| 1101 | 2104 | 40 | Microphthalmia associated transcription factor |
| 1101 | 2104 | 40 | MLH1                                           |
| 1101 | 2104 | 40 | MLL                                            |
| 1101 | 2104 | 40 | MLL2                                           |
| 1101 | 2104 | 40 | MPL                                            |
| 1101 | 2104 | 40 | MRE11A                                         |
| 1101 | 2104 | 40 | MSH2                                           |
| 1101 | 2104 | 40 | MSH6                                           |
| 1101 | 2104 | 40 | MTOR                                           |
| 1101 | 2104 | 40 | MUTYH                                          |
| 1101 | 2104 | 40 | MYC                                            |
| 1101 | 2104 | 40 | MYCL1                                          |
| 1101 | 2104 | 40 | MYCN                                           |
| 1101 | 2104 | 40 | MYD88                                          |
| 1101 | 2104 | 40 | MYST3                                          |
| 1101 | 2104 | 40 | NBN                                            |
| 1101 | 2104 | 40 | NCOR1                                          |
| 1101 | 2104 | 40 | NF1                                            |
| 1101 | 2104 | 40 | NF2                                            |
| 1101 | 2104 | 40 | NFE2L2                                         |
| 1101 | 2104 | 40 | NFKBIA                                         |
| 1101 | 2104 | 40 | NKX2-1                                         |
| 1101 | 2104 | 40 | NOTCH1                                         |
| 1101 | 2104 | 40 | NOTCH2                                         |
| 1101 | 2104 | 40 | NOTCH3                                         |
| 1101 | 2104 | 40 | NOTCH4                                         |
| 1101 | 2104 | 40 | Nucleophosmin (NPM1)                           |
| 1101 | 2104 | 40 | NRAS                                           |
| 1101 | 2104 | 40 | NSD1                                           |
| 1101 | 2104 | 40 | NTRK1                                          |
| 1101 | 2104 | 40 | NTRK2                                          |
| 1101 | 2104 | 40 | NTRK3                                          |
| 1101 | 2104 | 40 | NUP93                                          |
| 1101 | 2104 | 40 | PAK3                                           |

|      |      |    |                                |
|------|------|----|--------------------------------|
| 1101 | 2104 | 40 | PAK7                           |
| 1101 | 2104 | 40 | PALB2                          |
| 1101 | 2104 | 40 | PARP1                          |
| 1101 | 2104 | 40 | PARP2                          |
| 1101 | 2104 | 40 | PARP3                          |
| 1101 | 2104 | 40 | PARP4                          |
| 1101 | 2104 | 40 | PAX5                           |
| 1101 | 2104 | 40 | PBRM1                          |
| 1101 | 2104 | 40 | PDGFRA                         |
| 1101 | 2104 | 40 | PDGFRB                         |
| 1101 | 2104 | 40 | PDK1                           |
| 1101 | 2104 | 40 | PIK3C2G                        |
| 1101 | 2104 | 40 | PIK3C3                         |
| 1101 | 2104 | 40 | PIK3CG                         |
| 1101 | 2104 | 40 | PIK3R1                         |
| 1101 | 2104 | 40 | PIK3R2                         |
| 1101 | 2104 | 40 | PMS2                           |
| 1101 | 2104 | 40 | PNRC1                          |
| 1101 | 2104 | 40 | PPP2R1A                        |
| 1101 | 2104 | 40 | PRDM1                          |
| 1101 | 2104 | 40 | PRKAR1A                        |
| 1101 | 2104 | 40 | PRKDC                          |
| 1101 | 2104 | 40 | PRSS8                          |
| 1101 | 2104 | 40 | PTCH1                          |
| 1101 | 2104 | 40 | Phosphatase and Tensin homolog |
| 1101 | 2104 | 40 | PTPN11                         |
| 1101 | 2104 | 40 | RAD50                          |
| 1101 | 2104 | 40 | RAD51                          |
| 1101 | 2104 | 40 | RAD51B                         |
| 1101 | 2104 | 40 | RAD51C                         |
| 1101 | 2104 | 40 | RAD51D                         |
| 1101 | 2104 | 40 | RAD52                          |
| 1101 | 2104 | 40 | RAD54L                         |
| 1101 | 2104 | 40 | RAF1                           |
| 1101 | 2104 | 40 | RARA                           |
| 1101 | 2104 | 40 | 13q14(RB1)V                    |
| 1101 | 2104 | 40 | REL                            |
| 1101 | 2104 | 40 | RET                            |
| 1101 | 2104 | 40 | RICTOR                         |
| 1101 | 2104 | 40 | RNF43                          |

|      |      |    |                                   |
|------|------|----|-----------------------------------|
| 1101 | 2104 | 40 | ROS1                              |
| 1101 | 2104 | 40 | RPA1                              |
| 1101 | 2104 | 40 | RPTOR                             |
| 1101 | 2104 | 40 | RUNX1                             |
| 1101 | 2104 | 40 | RUNX1T1                           |
| 1101 | 2104 | 40 | SETD2                             |
| 1101 | 2104 | 40 | SF3B1                             |
| 1101 | 2104 | 40 | SH2B3                             |
| 1101 | 2104 | 40 | SMAD2                             |
| 1101 | 2104 | 40 | SMAD4                             |
| 1101 | 2104 | 40 | SMARCA4                           |
| 1101 | 2104 | 40 | SMARCB1                           |
| 1101 | 2104 | 40 | SMARCD1                           |
| 1101 | 2104 | 40 | SMO                               |
| 1101 | 2104 | 40 | SOCS1                             |
| 1101 | 2104 | 40 | SOX10                             |
| 1101 | 2104 | 40 | SOX2                              |
| 1101 | 2104 | 40 | SPEN                              |
| 1101 | 2104 | 40 | SPOP                              |
| 1101 | 2104 | 40 | SRC                               |
| 1101 | 2104 | 40 | STAG2                             |
| 1101 | 2104 | 40 | STAT4                             |
| 1101 | 2104 | 40 | STK11                             |
| 1101 | 2104 | 40 | SUFU                              |
| 1101 | 2104 | 40 | SYK                               |
| 1101 | 2104 | 40 | TBX3                              |
| 1101 | 2104 | 40 | TET2                              |
| 1101 | 2104 | 40 | TGFBR2                            |
| 1101 | 2104 | 40 | TIPARP                            |
| 1101 | 2104 | 40 | TMPRSS2                           |
| 1101 | 2104 | 40 | TNFAIP3                           |
| 1101 | 2104 | 40 | TNFRSF14                          |
| 1101 | 2104 | 40 | TOP1                              |
| 1101 | 2104 | 40 | TP53                              |
| 1101 | 2104 | 40 | TRRAP                             |
| 1101 | 2104 | 40 | Tuberous sclerosis complex 1 gene |
| 1101 | 2104 | 40 | Tuberous sclerosis complex 2 gene |
| 1101 | 2104 | 40 | TSHR                              |
| 1101 | 2104 | 40 | Von Hippel-Lindau                 |

|      |      |    |         |
|------|------|----|---------|
| 1101 | 2104 | 40 | WISP3   |
| 1101 | 2104 | 40 | WT1     |
| 1101 | 2104 | 40 | XPO1    |
| 1101 | 2104 | 40 | XRCC3   |
| 1101 | 2104 | 40 | ZNF217  |
| 1101 | 2104 | 40 | ZNF703  |
| 1102 | 2105 | 30 | ABL1    |
| 1102 | 2105 | 30 | AKT2    |
| 1102 | 2105 | 30 | AKT3    |
| 1102 | 2105 | 30 | ALK     |
| 1102 | 2105 | 30 | ALOX12B |
| 1102 | 2105 | 30 | APC     |
| 1102 | 2105 | 30 | APCDD1  |
| 1102 | 2105 | 30 | AR      |
| 1102 | 2105 | 30 | ARAF    |
| 1102 | 2105 | 30 | ARFRP1  |
| 1102 | 2105 | 30 | ARID1A  |
| 1102 | 2105 | 30 | ARID2   |
| 1102 | 2105 | 30 | ASXL1   |
| 1102 | 2105 | 30 | ATM     |
| 1102 | 2105 | 30 | ATR     |
| 1102 | 2105 | 30 | ATRX    |
| 1102 | 2105 | 30 | AURKA   |
| 1102 | 2105 | 30 | AURKB   |
| 1102 | 2105 | 30 | AXL     |
| 1102 | 2105 | 30 | BACH1   |
| 1102 | 2105 | 30 | BAP1    |
| 1102 | 2105 | 30 | BARD1   |
| 1102 | 2105 | 30 | BCL-2   |
| 1102 | 2105 | 30 | BCL2L2  |
| 1102 | 2105 | 30 | BCL6    |
| 1102 | 2105 | 30 | BCOR    |
| 1102 | 2105 | 30 | BCORL1  |
| 1102 | 2105 | 30 | BCR     |
| 1102 | 2105 | 30 | BLM     |
| 1102 | 2105 | 30 | BRAF    |
| 1102 | 2105 | 30 | BRCA1   |
| 1102 | 2105 | 30 | BRCA2   |
| 1102 | 2105 | 30 | BRIP1   |
| 1102 | 2105 | 30 | BTG1    |



|      |      |    |                                       |
|------|------|----|---------------------------------------|
| 1102 | 2105 | 30 | BTK                                   |
| 1102 | 2105 | 30 | C17orf39                              |
| 1102 | 2105 | 30 | CARD11                                |
| 1102 | 2105 | 30 | CASP8                                 |
| 1102 | 2105 | 30 | CBFB                                  |
| 1102 | 2105 | 30 | CBL                                   |
| 1102 | 2105 | 30 | CCND2                                 |
| 1102 | 2105 | 30 | CCND3                                 |
| 1102 | 2105 | 30 | CCNE1                                 |
| 1102 | 2105 | 30 | CD79A                                 |
| 1102 | 2105 | 30 | CD79B                                 |
| 1102 | 2105 | 30 | CDC73                                 |
| 1102 | 2105 | 30 | CDH1                                  |
| 1102 | 2105 | 30 | CDK12                                 |
| 1102 | 2105 | 30 | Cyclin dependent kinase-4             |
| 1102 | 2105 | 30 | CDK6                                  |
| 1102 | 2105 | 30 | CDK8                                  |
| 1102 | 2105 | 30 | CDKN1B                                |
| 1102 | 2105 | 30 | CDKN2A                                |
| 1102 | 2105 | 30 | CDKN2B                                |
| 1102 | 2105 | 30 | CDKN2C                                |
| 1102 | 2105 | 30 | CCAT/enhancer binding protein (CEBPA) |
| 1102 | 2105 | 30 | CHEK1                                 |
| 1102 | 2105 | 30 | CHEK2                                 |
| 1102 | 2105 | 30 | CHUK                                  |
| 1102 | 2105 | 30 | CIC                                   |
| 1102 | 2105 | 30 | CRBN                                  |
| 1102 | 2105 | 30 | CREBBP                                |
| 1102 | 2105 | 30 | CRKL                                  |
| 1102 | 2105 | 30 | CRLF2                                 |
| 1102 | 2105 | 30 | CSF1R                                 |
| 1102 | 2105 | 30 | CTCF                                  |
| 1102 | 2105 | 30 | CTNNA1                                |
| 1102 | 2105 | 30 | CTNNB1                                |
| 1102 | 2105 | 30 | CUL4A                                 |
| 1102 | 2105 | 30 | CUL4B                                 |
| 1102 | 2105 | 30 | CYP17A1                               |
| 1102 | 2105 | 30 | DAXX                                  |
| 1102 | 2105 | 30 | DDR2                                  |
| 1102 | 2105 | 30 | DIS3                                  |

|      |      |    |                                  |
|------|------|----|----------------------------------|
| 1102 | 2105 | 30 | DNMT3A                           |
| 1102 | 2105 | 30 | DOT1L                            |
| 1102 | 2105 | 30 | Epidermal Growth Factor Receptor |
| 1102 | 2105 | 30 | EMSY                             |
| 1102 | 2105 | 30 | EP300                            |
| 1102 | 2105 | 30 | EPHA3                            |
| 1102 | 2105 | 30 | EPHA5                            |
| 1102 | 2105 | 30 | EPHB1                            |
| 1102 | 2105 | 30 | ERBB2                            |
| 1102 | 2105 | 30 | ERBB3                            |
| 1102 | 2105 | 30 | ERBB4                            |
| 1102 | 2105 | 30 | ERG                              |
| 1102 | 2105 | 30 | Estrogen receptor 1              |
| 1102 | 2105 | 30 | ETV1                             |
| 1102 | 2105 | 30 | ETV4                             |
| 1102 | 2105 | 30 | ETV5                             |
| 1102 | 2105 | 30 | ETV6                             |
| 1102 | 2105 | 30 | EWSR1                            |
| 1102 | 2105 | 30 | EZH2                             |
| 1102 | 2105 | 30 | FAM123B(WTX)                     |
| 1102 | 2105 | 30 | FAM46C                           |
| 1102 | 2105 | 30 | FANCA                            |
| 1102 | 2105 | 30 | FANCC                            |
| 1102 | 2105 | 30 | FANCD2                           |
| 1102 | 2105 | 30 | FANCE                            |
| 1102 | 2105 | 30 | FANCF                            |
| 1102 | 2105 | 30 | FANCG                            |
| 1102 | 2105 | 30 | FANCI                            |
| 1102 | 2105 | 30 | FANCL                            |
| 1102 | 2105 | 30 | FANCM                            |
| 1102 | 2105 | 30 | FAT3                             |
| 1102 | 2105 | 30 | FBXW7                            |
| 1102 | 2105 | 30 | FGF10                            |
| 1102 | 2105 | 30 | FGF12                            |
| 1102 | 2105 | 30 | FGF14                            |
| 1102 | 2105 | 30 | Fibroblast growth factor 23      |
| 1102 | 2105 | 30 | FGF6                             |
| 1102 | 2105 | 30 | FGF7                             |
| 1102 | 2105 | 30 | Fibroblast growth receptor 1     |
| 1102 | 2105 | 30 | Fibroblast growth receptor 2     |

|      |      |    |                                                  |
|------|------|----|--------------------------------------------------|
| 1102 | 2105 | 30 | Fibroblast growth receptor 3                     |
| 1102 | 2105 | 30 | Fibroblast growth receptor 4                     |
| 1102 | 2105 | 30 | FLT1                                             |
| 1102 | 2105 | 30 | Fms-like tyrosine kinase 3 (FLT3)                |
| 1102 | 2105 | 30 | FLT4                                             |
| 1102 | 2105 | 30 | FOXL2                                            |
| 1102 | 2105 | 30 | GATA1                                            |
| 1102 | 2105 | 30 | GATA2                                            |
| 1102 | 2105 | 30 | GATA3                                            |
| 1102 | 2105 | 30 | GNA11                                            |
| 1102 | 2105 | 30 | GNA13                                            |
| 1102 | 2105 | 30 | GNAQ                                             |
| 1102 | 2105 | 30 | GNAS                                             |
| 1102 | 2105 | 30 | GPR124                                           |
| 1102 | 2105 | 30 | GRIN2A                                           |
| 1102 | 2105 | 30 | GSK3B                                            |
| 1102 | 2105 | 30 | Hepatocyte growth factor                         |
| 1102 | 2105 | 30 | HLA-A                                            |
| 1102 | 2105 | 30 | HRAS                                             |
| 1102 | 2105 | 30 | IDH1                                             |
| 1102 | 2105 | 30 | IDH2                                             |
| 1102 | 2105 | 30 | Insulin-like growth factor 1                     |
| 1102 | 2105 | 30 | Insulin growth factor 1 receptor                 |
| 1102 | 2105 | 30 | Insulin-like growth factor 2, also somatomedin A |
| 1102 | 2105 | 30 | IKBKE                                            |
| 1102 | 2105 | 30 | IKZF1                                            |
| 1102 | 2105 | 30 | IL7R                                             |
| 1102 | 2105 | 30 | INHBA                                            |
| 1102 | 2105 | 30 | IRF4                                             |
| 1102 | 2105 | 30 | IRS2                                             |
| 1102 | 2105 | 30 | JAK1                                             |
| 1102 | 2105 | 30 | JAK2                                             |
| 1102 | 2105 | 30 | JAK3                                             |
| 1102 | 2105 | 30 | JUN                                              |
| 1102 | 2105 | 30 | KDM5A                                            |
| 1102 | 2105 | 30 | KDM5C                                            |
| 1102 | 2105 | 30 | KDM6A                                            |
| 1102 | 2105 | 30 | KDR                                              |
| 1102 | 2105 | 30 | KEAP1                                            |
| 1102 | 2105 | 30 | KIT                                              |

|      |      |    |                                                |
|------|------|----|------------------------------------------------|
| 1102 | 2105 | 30 | KLHL6                                          |
| 1102 | 2105 | 30 | KRAS                                           |
| 1102 | 2105 | 30 | LMO1                                           |
| 1102 | 2105 | 30 | LRP1B                                          |
| 1102 | 2105 | 30 | MAP2K1                                         |
| 1102 | 2105 | 30 | MAP2K2                                         |
| 1102 | 2105 | 30 | MAP2K4                                         |
| 1102 | 2105 | 30 | MAP3K1                                         |
| 1102 | 2105 | 30 | MAP3K13                                        |
| 1102 | 2105 | 30 | MCL1                                           |
| 1102 | 2105 | 30 | MDM2                                           |
| 1102 | 2105 | 30 | MDM4                                           |
| 1102 | 2105 | 30 | MED12                                          |
| 1102 | 2105 | 30 | MEF2B                                          |
| 1102 | 2105 | 30 | MEN1                                           |
| 1102 | 2105 | 30 | MET                                            |
| 1102 | 2105 | 30 | Microphthalmia associated transcription factor |
| 1102 | 2105 | 30 | MLH1                                           |
| 1102 | 2105 | 30 | MLL                                            |
| 1102 | 2105 | 30 | MLL2                                           |
| 1102 | 2105 | 30 | MPL                                            |
| 1102 | 2105 | 30 | MRE11A                                         |
| 1102 | 2105 | 30 | MSH2                                           |
| 1102 | 2105 | 30 | MSH6                                           |
| 1102 | 2105 | 30 | MTOR                                           |
| 1102 | 2105 | 30 | MUTYH                                          |
| 1102 | 2105 | 30 | MYCL1                                          |
| 1102 | 2105 | 30 | MYCN                                           |
| 1102 | 2105 | 30 | MYD88                                          |
| 1102 | 2105 | 30 | MYST3                                          |
| 1102 | 2105 | 30 | NBN                                            |
| 1102 | 2105 | 30 | NCOR1                                          |
| 1102 | 2105 | 30 | NF1                                            |
| 1102 | 2105 | 30 | NF2                                            |
| 1102 | 2105 | 30 | NFE2L2                                         |
| 1102 | 2105 | 30 | NFKBIA                                         |
| 1102 | 2105 | 30 | NKX2-1                                         |
| 1102 | 2105 | 30 | NOTCH1                                         |
| 1102 | 2105 | 30 | NOTCH2                                         |
| 1102 | 2105 | 30 | NOTCH3                                         |

|      |      |    |                                |
|------|------|----|--------------------------------|
| 1102 | 2105 | 30 | NOTCH4                         |
| 1102 | 2105 | 30 | Nucleophosmin (NPM1)           |
| 1102 | 2105 | 30 | NRAS                           |
| 1102 | 2105 | 30 | NSD1                           |
| 1102 | 2105 | 30 | NTRK1                          |
| 1102 | 2105 | 30 | NTRK2                          |
| 1102 | 2105 | 30 | NTRK3                          |
| 1102 | 2105 | 30 | NUP93                          |
| 1102 | 2105 | 30 | PAK3                           |
| 1102 | 2105 | 30 | PAK7                           |
| 1102 | 2105 | 30 | PALB2                          |
| 1102 | 2105 | 30 | PARP1                          |
| 1102 | 2105 | 30 | PARP2                          |
| 1102 | 2105 | 30 | PARP3                          |
| 1102 | 2105 | 30 | PARP4                          |
| 1102 | 2105 | 30 | PAX5                           |
| 1102 | 2105 | 30 | PBRM1                          |
| 1102 | 2105 | 30 | PDGFRA                         |
| 1102 | 2105 | 30 | PDGFRB                         |
| 1102 | 2105 | 30 | PK1                            |
| 1102 | 2105 | 30 | PIK3C2G                        |
| 1102 | 2105 | 30 | PIK3C3                         |
| 1102 | 2105 | 30 | <i>PIK3CA</i>                  |
| 1102 | 2105 | 30 | PIK3CG                         |
| 1102 | 2105 | 30 | PIK3R1                         |
| 1102 | 2105 | 30 | PIK3R2                         |
| 1102 | 2105 | 30 | PMS2                           |
| 1102 | 2105 | 30 | PNRC1                          |
| 1102 | 2105 | 30 | PPP2R1A                        |
| 1102 | 2105 | 30 | PRDM1                          |
| 1102 | 2105 | 30 | PRKAR1A                        |
| 1102 | 2105 | 30 | PRKDC                          |
| 1102 | 2105 | 30 | PRSS8                          |
| 1102 | 2105 | 30 | PTCH1                          |
| 1102 | 2105 | 30 | Phosphatase and Tensin homolog |
| 1102 | 2105 | 30 | PTPN11                         |
| 1102 | 2105 | 30 | RAD50                          |
| 1102 | 2105 | 30 | RAD51                          |
| 1102 | 2105 | 30 | RAD51B                         |
| 1102 | 2105 | 30 | RAD51C                         |

|      |      |    |             |
|------|------|----|-------------|
| 1102 | 2105 | 30 | RAD51D      |
| 1102 | 2105 | 30 | RAD52       |
| 1102 | 2105 | 30 | RAD54L      |
| 1102 | 2105 | 30 | RAF1        |
| 1102 | 2105 | 30 | RARA        |
| 1102 | 2105 | 30 | 13q14(RB1)V |
| 1102 | 2105 | 30 | REL         |
| 1102 | 2105 | 30 | RET         |
| 1102 | 2105 | 30 | RICTOR      |
| 1102 | 2105 | 30 | RNF43       |
| 1102 | 2105 | 30 | ROS1        |
| 1102 | 2105 | 30 | RPA1        |
| 1102 | 2105 | 30 | RPTOR       |
| 1102 | 2105 | 30 | RUNX1       |
| 1102 | 2105 | 30 | RUNX1T1     |
| 1102 | 2105 | 30 | SETD2       |
| 1102 | 2105 | 30 | SF3B1       |
| 1102 | 2105 | 30 | SH2B3       |
| 1102 | 2105 | 30 | SMAD2       |
| 1102 | 2105 | 30 | SMAD4       |
| 1102 | 2105 | 30 | SMARCA4     |
| 1102 | 2105 | 30 | SMARCB1     |
| 1102 | 2105 | 30 | SMARCD1     |
| 1102 | 2105 | 30 | SMO         |
| 1102 | 2105 | 30 | SOCS1       |
| 1102 | 2105 | 30 | SOX10       |
| 1102 | 2105 | 30 | SOX2        |
| 1102 | 2105 | 30 | SPEN        |
| 1102 | 2105 | 30 | SPOP        |
| 1102 | 2105 | 30 | SRC         |
| 1102 | 2105 | 30 | STAG2       |
| 1102 | 2105 | 30 | STAT4       |
| 1102 | 2105 | 30 | STK11       |
| 1102 | 2105 | 30 | SUFU        |
| 1102 | 2105 | 30 | SYK         |
| 1102 | 2105 | 30 | TBX3        |
| 1102 | 2105 | 30 | TET2        |
| 1102 | 2105 | 30 | TGFBR2      |
| 1102 | 2105 | 30 | TIPARP      |
| 1102 | 2105 | 30 | TMPRSS2     |

|      |      |    |                                   |
|------|------|----|-----------------------------------|
| 1102 | 2105 | 30 | TNFAIP3                           |
| 1102 | 2105 | 30 | TNFRSF14                          |
| 1102 | 2105 | 30 | TOP1                              |
| 1102 | 2105 | 30 | TRRAP                             |
| 1102 | 2105 | 30 | Tuberous sclerosis complex 1 gene |
| 1102 | 2105 | 30 | Tuberous sclerosis complex 2 gene |
| 1102 | 2105 | 30 | TSHR                              |
| 1102 | 2105 | 30 | Von Hippel-Lindau                 |
| 1102 | 2105 | 30 | WISP3                             |
| 1102 | 2105 | 30 | WT1                               |
| 1102 | 2105 | 30 | XPO1                              |
| 1102 | 2105 | 30 | XRCC3                             |
| 1102 | 2105 | 30 | ZNF217                            |
| 1102 | 2105 | 30 | ZNF703                            |
| 1103 | 2106 | 20 | ABL1                              |
| 1103 | 2106 | 20 | AKT1                              |
| 1103 | 2106 | 20 | AKT2                              |
| 1103 | 2106 | 20 | AKT3                              |
| 1103 | 2106 | 20 | ALK                               |
| 1103 | 2106 | 20 | ALOX12B                           |
| 1103 | 2106 | 20 | APC                               |
| 1103 | 2106 | 20 | APCDD1                            |
| 1103 | 2106 | 20 | AR                                |
| 1103 | 2106 | 20 | ARAF                              |
| 1103 | 2106 | 20 | ARFRP1                            |
| 1103 | 2106 | 20 | ARID1A                            |
| 1103 | 2106 | 20 | ARID2                             |
| 1103 | 2106 | 20 | ATM                               |
| 1103 | 2106 | 20 | ATR                               |
| 1103 | 2106 | 20 | ATRX                              |
| 1103 | 2106 | 20 | AURKA                             |
| 1103 | 2106 | 20 | AURKB                             |
| 1103 | 2106 | 20 | AXL                               |
| 1103 | 2106 | 20 | BACH1                             |
| 1103 | 2106 | 20 | BAP1                              |
| 1103 | 2106 | 20 | BARD1                             |
| 1103 | 2106 | 20 | BCL-2                             |
| 1103 | 2106 | 20 | BCL2L2                            |
| 1103 | 2106 | 20 | BCL6                              |

|      |      |    |                                       |
|------|------|----|---------------------------------------|
| 1103 | 2106 | 20 | BCOR                                  |
| 1103 | 2106 | 20 | BCORL1                                |
| 1103 | 2106 | 20 | BCR                                   |
| 1103 | 2106 | 20 | BLM                                   |
| 1103 | 2106 | 20 | BRAF                                  |
| 1103 | 2106 | 20 | BRCA1                                 |
| 1103 | 2106 | 20 | BRCA2                                 |
| 1103 | 2106 | 20 | BRIP1                                 |
| 1103 | 2106 | 20 | BTG1                                  |
| 1103 | 2106 | 20 | BTK                                   |
| 1103 | 2106 | 20 | C17orf39                              |
| 1103 | 2106 | 20 | CARD11                                |
| 1103 | 2106 | 20 | CASP8                                 |
| 1103 | 2106 | 20 | CBFB                                  |
| 1103 | 2106 | 20 | CBL                                   |
| 1103 | 2106 | 20 | CCND1                                 |
| 1103 | 2106 | 20 | CCND2                                 |
| 1103 | 2106 | 20 | CCND3                                 |
| 1103 | 2106 | 20 | CCNE1                                 |
| 1103 | 2106 | 20 | CD79A                                 |
| 1103 | 2106 | 20 | CD79B                                 |
| 1103 | 2106 | 20 | CDC73                                 |
| 1103 | 2106 | 20 | CDH1                                  |
| 1103 | 2106 | 20 | CDK12                                 |
| 1103 | 2106 | 20 | Cyclin dependent kinase-4             |
| 1103 | 2106 | 20 | CDK6                                  |
| 1103 | 2106 | 20 | CDK8                                  |
| 1103 | 2106 | 20 | CDKN1B                                |
| 1103 | 2106 | 20 | CDKN2A                                |
| 1103 | 2106 | 20 | CDKN2B                                |
| 1103 | 2106 | 20 | CDKN2C                                |
| 1103 | 2106 | 20 | CCAT/enhancer binding protein (CEBPA) |
| 1103 | 2106 | 20 | CHEK1                                 |
| 1103 | 2106 | 20 | CHEK2                                 |
| 1103 | 2106 | 20 | CHUK                                  |
| 1103 | 2106 | 20 | CIC                                   |
| 1103 | 2106 | 20 | CRBN                                  |
| 1103 | 2106 | 20 | CREBBP                                |
| 1103 | 2106 | 20 | CRKL                                  |
| 1103 | 2106 | 20 | CRLF2                                 |



|      |      |    |                                  |
|------|------|----|----------------------------------|
| 1103 | 2106 | 20 | CSF1R                            |
| 1103 | 2106 | 20 | CTCF                             |
| 1103 | 2106 | 20 | CTNNA1                           |
| 1103 | 2106 | 20 | CTNNB1                           |
| 1103 | 2106 | 20 | CUL4A                            |
| 1103 | 2106 | 20 | CUL4B                            |
| 1103 | 2106 | 20 | CYP17A1                          |
| 1103 | 2106 | 20 | DAXX                             |
| 1103 | 2106 | 20 | DDR2                             |
| 1103 | 2106 | 20 | DIS3                             |
| 1103 | 2106 | 20 | DNMT3A                           |
| 1103 | 2106 | 20 | DOT1L                            |
| 1103 | 2106 | 20 | Epidermal Growth Factor Receptor |
| 1103 | 2106 | 20 | EMSY                             |
| 1103 | 2106 | 20 | EP300                            |
| 1103 | 2106 | 20 | EPHA3                            |
| 1103 | 2106 | 20 | EPHA5                            |
| 1103 | 2106 | 20 | EPHB1                            |
| 1103 | 2106 | 20 | ERBB2                            |
| 1103 | 2106 | 20 | ERBB3                            |
| 1103 | 2106 | 20 | ERBB4                            |
| 1103 | 2106 | 20 | ERG                              |
| 1103 | 2106 | 20 | Estrogen receptor 1              |
| 1103 | 2106 | 20 | ETV1                             |
| 1103 | 2106 | 20 | ETV4                             |
| 1103 | 2106 | 20 | ETV5                             |
| 1103 | 2106 | 20 | ETV6                             |
| 1103 | 2106 | 20 | EWSR1                            |
| 1103 | 2106 | 20 | EZH2                             |
| 1103 | 2106 | 20 | FAM123B(WTX)                     |
| 1103 | 2106 | 20 | FAM46C                           |
| 1103 | 2106 | 20 | FANCA                            |
| 1103 | 2106 | 20 | FANCC                            |
| 1103 | 2106 | 20 | FANCD2                           |
| 1103 | 2106 | 20 | FANCE                            |
| 1103 | 2106 | 20 | FANCF                            |
| 1103 | 2106 | 20 | FANCG                            |
| 1103 | 2106 | 20 | FANCI                            |
| 1103 | 2106 | 20 | FANCL                            |
| 1103 | 2106 | 20 | FANCM                            |

|      |      |    |                                                  |
|------|------|----|--------------------------------------------------|
| 1103 | 2106 | 20 | FAT3                                             |
| 1103 | 2106 | 20 | FBXW7                                            |
| 1103 | 2106 | 20 | FGF10                                            |
| 1103 | 2106 | 20 | FGF12                                            |
| 1103 | 2106 | 20 | FGF14                                            |
| 1103 | 2106 | 20 | Fibroblast growth factor 19                      |
| 1103 | 2106 | 20 | Fibroblast growth factor 23                      |
| 1103 | 2106 | 20 | Fibroblast growth factor 3                       |
| 1103 | 2106 | 20 | FGF4                                             |
| 1103 | 2106 | 20 | FGF6                                             |
| 1103 | 2106 | 20 | FGF7                                             |
| 1103 | 2106 | 20 | Fibroblast growth receptor 1                     |
| 1103 | 2106 | 20 | Fibroblast growth receptor 2                     |
| 1103 | 2106 | 20 | Fibroblast growth receptor 3                     |
| 1103 | 2106 | 20 | Fibroblast growth receptor 4                     |
| 1103 | 2106 | 20 | FLT1                                             |
| 1103 | 2106 | 20 | Fms-like tyrosine kinase 3 (FLT3)                |
| 1103 | 2106 | 20 | FLT4                                             |
| 1103 | 2106 | 20 | FOXL2                                            |
| 1103 | 2106 | 20 | GATA1                                            |
| 1103 | 2106 | 20 | GATA2                                            |
| 1103 | 2106 | 20 | GNA11                                            |
| 1103 | 2106 | 20 | GNA13                                            |
| 1103 | 2106 | 20 | GNAQ                                             |
| 1103 | 2106 | 20 | GNAS                                             |
| 1103 | 2106 | 20 | GPR124                                           |
| 1103 | 2106 | 20 | GRIN2A                                           |
| 1103 | 2106 | 20 | GSK3B                                            |
| 1103 | 2106 | 20 | Hepatocyte growth factor                         |
| 1103 | 2106 | 20 | HLA-A                                            |
| 1103 | 2106 | 20 | HRAS                                             |
| 1103 | 2106 | 20 | IDH1                                             |
| 1103 | 2106 | 20 | IDH2                                             |
| 1103 | 2106 | 20 | Insulin-like growth factor 1                     |
| 1103 | 2106 | 20 | Insulin growth factor 1 receptor                 |
| 1103 | 2106 | 20 | Insulin-like growth factor 2, also somatomedin A |
| 1103 | 2106 | 20 | IKBKE                                            |
| 1103 | 2106 | 20 | IKZF1                                            |
| 1103 | 2106 | 20 | IL7R                                             |
| 1103 | 2106 | 20 | INHBA                                            |

|      |      |    |                                                |
|------|------|----|------------------------------------------------|
| 1103 | 2106 | 20 | IRF4                                           |
| 1103 | 2106 | 20 | IRS2                                           |
| 1103 | 2106 | 20 | JAK1                                           |
| 1103 | 2106 | 20 | JAK2                                           |
| 1103 | 2106 | 20 | JAK3                                           |
| 1103 | 2106 | 20 | JUN                                            |
| 1103 | 2106 | 20 | KDM5A                                          |
| 1103 | 2106 | 20 | KDM5C                                          |
| 1103 | 2106 | 20 | KDM6A                                          |
| 1103 | 2106 | 20 | KDR                                            |
| 1103 | 2106 | 20 | KEAP1                                          |
| 1103 | 2106 | 20 | KIT                                            |
| 1103 | 2106 | 20 | KLHL6                                          |
| 1103 | 2106 | 20 | KRAS                                           |
| 1103 | 2106 | 20 | LMO1                                           |
| 1103 | 2106 | 20 | LRP1B                                          |
| 1103 | 2106 | 20 | MAP2K1                                         |
| 1103 | 2106 | 20 | MAP2K2                                         |
| 1103 | 2106 | 20 | MAP2K4                                         |
| 1103 | 2106 | 20 | MAP3K1                                         |
| 1103 | 2106 | 20 | MAP3K13                                        |
| 1103 | 2106 | 20 | MCL1                                           |
| 1103 | 2106 | 20 | MDM2                                           |
| 1103 | 2106 | 20 | MDM4                                           |
| 1103 | 2106 | 20 | MED12                                          |
| 1103 | 2106 | 20 | MEF2B                                          |
| 1103 | 2106 | 20 | MEN1                                           |
| 1103 | 2106 | 20 | MET                                            |
| 1103 | 2106 | 20 | Microphthalmia associated transcription factor |
| 1103 | 2106 | 20 | MLH1                                           |
| 1103 | 2106 | 20 | MLL                                            |
| 1103 | 2106 | 20 | MLL2                                           |
| 1103 | 2106 | 20 | MPL                                            |
| 1103 | 2106 | 20 | MRE11A                                         |
| 1103 | 2106 | 20 | MSH2                                           |
| 1103 | 2106 | 20 | MSH6                                           |
| 1103 | 2106 | 20 | MTOR                                           |
| 1103 | 2106 | 20 | MUTYH                                          |
| 1103 | 2106 | 20 | MYC                                            |
| 1103 | 2106 | 20 | MYCL1                                          |

|      |      |    |                      |
|------|------|----|----------------------|
| 1103 | 2106 | 20 | MYCN                 |
| 1103 | 2106 | 20 | MYD88                |
| 1103 | 2106 | 20 | MYST3                |
| 1103 | 2106 | 20 | NBN                  |
| 1103 | 2106 | 20 | NCOR1                |
| 1103 | 2106 | 20 | NF1                  |
| 1103 | 2106 | 20 | NF2                  |
| 1103 | 2106 | 20 | NFE2L2               |
| 1103 | 2106 | 20 | NFKBIA               |
| 1103 | 2106 | 20 | NKX2-1               |
| 1103 | 2106 | 20 | NOTCH1               |
| 1103 | 2106 | 20 | NOTCH2               |
| 1103 | 2106 | 20 | NOTCH3               |
| 1103 | 2106 | 20 | NOTCH4               |
| 1103 | 2106 | 20 | Nucleophosmin (NPM1) |
| 1103 | 2106 | 20 | NRAS                 |
| 1103 | 2106 | 20 | NSD1                 |
| 1103 | 2106 | 20 | NTRK1                |
| 1103 | 2106 | 20 | NTRK2                |
| 1103 | 2106 | 20 | NTRK3                |
| 1103 | 2106 | 20 | NUP93                |
| 1103 | 2106 | 20 | PAK3                 |
| 1103 | 2106 | 20 | PAK7                 |
| 1103 | 2106 | 20 | PALB2                |
| 1103 | 2106 | 20 | PARP1                |
| 1103 | 2106 | 20 | PARP2                |
| 1103 | 2106 | 20 | PARP3                |
| 1103 | 2106 | 20 | PARP4                |
| 1103 | 2106 | 20 | PAX5                 |
| 1103 | 2106 | 20 | PBRM1                |
| 1103 | 2106 | 20 | PDGFRA               |
| 1103 | 2106 | 20 | PDGFRB               |
| 1103 | 2106 | 20 | PDK1                 |
| 1103 | 2106 | 20 | PIK3C2G              |
| 1103 | 2106 | 20 | PIK3C3               |
| 1103 | 2106 | 20 | PIK3CG               |
| 1103 | 2106 | 20 | PIK3R1               |
| 1103 | 2106 | 20 | PIK3R2               |
| 1103 | 2106 | 20 | PMS2                 |
| 1103 | 2106 | 20 | PNRC1                |

|      |      |    |                                |
|------|------|----|--------------------------------|
| 1103 | 2106 | 20 | PPP2R1A                        |
| 1103 | 2106 | 20 | PRDM1                          |
| 1103 | 2106 | 20 | PRKAR1A                        |
| 1103 | 2106 | 20 | PRKDC                          |
| 1103 | 2106 | 20 | PRSS8                          |
| 1103 | 2106 | 20 | PTCH1                          |
| 1103 | 2106 | 20 | Phosphatase and Tensin homolog |
| 1103 | 2106 | 20 | PTPN11                         |
| 1103 | 2106 | 20 | RAD50                          |
| 1103 | 2106 | 20 | RAD51                          |
| 1103 | 2106 | 20 | RAD51B                         |
| 1103 | 2106 | 20 | RAD51C                         |
| 1103 | 2106 | 20 | RAD51D                         |
| 1103 | 2106 | 20 | RAD52                          |
| 1103 | 2106 | 20 | RAD54L                         |
| 1103 | 2106 | 20 | RAF1                           |
| 1103 | 2106 | 20 | RARA                           |
| 1103 | 2106 | 20 | 13q14(RB1)V                    |
| 1103 | 2106 | 20 | REL                            |
| 1103 | 2106 | 20 | RET                            |
| 1103 | 2106 | 20 | RICTOR                         |
| 1103 | 2106 | 20 | RNF43                          |
| 1103 | 2106 | 20 | ROS1                           |
| 1103 | 2106 | 20 | RPA1                           |
| 1103 | 2106 | 20 | RPTOR                          |
| 1103 | 2106 | 20 | RUNX1                          |
| 1103 | 2106 | 20 | RUNX1T1                        |
| 1103 | 2106 | 20 | SETD2                          |
| 1103 | 2106 | 20 | SF3B1                          |
| 1103 | 2106 | 20 | SH2B3                          |
| 1103 | 2106 | 20 | SMAD2                          |
| 1103 | 2106 | 20 | SMAD4                          |
| 1103 | 2106 | 20 | SMARCA4                        |
| 1103 | 2106 | 20 | SMARCB1                        |
| 1103 | 2106 | 20 | SMARCD1                        |
| 1103 | 2106 | 20 | SMO                            |
| 1103 | 2106 | 20 | SOCS1                          |
| 1103 | 2106 | 20 | SOX10                          |
| 1103 | 2106 | 20 | SOX2                           |
| 1103 | 2106 | 20 | SPEN                           |

|      |      |    |                                   |
|------|------|----|-----------------------------------|
| 1103 | 2106 | 20 | SPOP                              |
| 1103 | 2106 | 20 | SRC                               |
| 1103 | 2106 | 20 | STAG2                             |
| 1103 | 2106 | 20 | STAT4                             |
| 1103 | 2106 | 20 | STK11                             |
| 1103 | 2106 | 20 | SUFU                              |
| 1103 | 2106 | 20 | SYK                               |
| 1103 | 2106 | 20 | TBX3                              |
| 1103 | 2106 | 20 | TET2                              |
| 1103 | 2106 | 20 | TGFBR2                            |
| 1103 | 2106 | 20 | TIPARP                            |
| 1103 | 2106 | 20 | TMPRSS2                           |
| 1103 | 2106 | 20 | TNFAIP3                           |
| 1103 | 2106 | 20 | TNFRSF14                          |
| 1103 | 2106 | 20 | TOP1                              |
| 1103 | 2106 | 20 | TRRAP                             |
| 1103 | 2106 | 20 | Tuberous sclerosis complex 1 gene |
| 1103 | 2106 | 20 | Tuberous sclerosis complex 2 gene |
| 1103 | 2106 | 20 | TSHR                              |
| 1103 | 2106 | 20 | Von Hippel-Lindau                 |
| 1103 | 2106 | 20 | WISP3                             |
| 1103 | 2106 | 20 | WT1                               |
| 1103 | 2106 | 20 | XPO1                              |
| 1103 | 2106 | 20 | XRCC3                             |
| 1103 | 2106 | 20 | ZNF217                            |
| 1103 | 2106 | 20 | ZNF703                            |
| 1103 |      | 20 | <i>PIK3CA</i>                     |
| 1103 |      | 20 | ASXL1                             |
| 1104 | 2107 | 25 | ABL1                              |
| 1104 | 2107 | 25 | AKT1                              |
| 1104 | 2107 | 25 | AKT2                              |
| 1104 | 2107 | 25 | AKT3                              |
| 1104 | 2107 | 25 | ALK                               |
| 1104 | 2107 | 25 | ALOX12B                           |
| 1104 | 2107 | 25 | APC                               |
| 1104 | 2107 | 25 | APCDD1                            |
| 1104 | 2107 | 25 | AR                                |
| 1104 | 2107 | 25 | ARAF                              |
| 1104 | 2107 | 25 | ARFRP1                            |

|      |      |    |                           |
|------|------|----|---------------------------|
| 1104 | 2107 | 25 | ARID1A                    |
| 1104 | 2107 | 25 | ARID2                     |
| 1104 | 2107 | 25 | ASXL1                     |
| 1104 | 2107 | 25 | ATM                       |
| 1104 | 2107 | 25 | ATR                       |
| 1104 | 2107 | 25 | ATRX                      |
| 1104 | 2107 | 25 | AURKA                     |
| 1104 | 2107 | 25 | AURKB                     |
| 1104 | 2107 | 25 | AXL                       |
| 1104 | 2107 | 25 | BACH1                     |
| 1104 | 2107 | 25 | BAP1                      |
| 1104 | 2107 | 25 | BARD1                     |
| 1104 | 2107 | 25 | BCL-2                     |
| 1104 | 2107 | 25 | BCL2L2                    |
| 1104 | 2107 | 25 | BCL6                      |
| 1104 | 2107 | 25 | BCOR                      |
| 1104 | 2107 | 25 | BCORL1                    |
| 1104 | 2107 | 25 | BCR                       |
| 1104 | 2107 | 25 | BLM                       |
| 1104 | 2107 | 25 | BRAF                      |
| 1104 | 2107 | 25 | BRCA1                     |
| 1104 | 2107 | 25 | BRCA2                     |
| 1104 | 2107 | 25 | BRIP1                     |
| 1104 | 2107 | 25 | BTG1                      |
| 1104 | 2107 | 25 | BTK                       |
| 1104 | 2107 | 25 | C17orf39                  |
| 1104 | 2107 | 25 | CARD11                    |
| 1104 | 2107 | 25 | CASP8                     |
| 1104 | 2107 | 25 | CBFB                      |
| 1104 | 2107 | 25 | CBL                       |
| 1104 | 2107 | 25 | CCND1                     |
| 1104 | 2107 | 25 | CCND2                     |
| 1104 | 2107 | 25 | CCND3                     |
| 1104 | 2107 | 25 | CCNE1                     |
| 1104 | 2107 | 25 | CD79A                     |
| 1104 | 2107 | 25 | CD79B                     |
| 1104 | 2107 | 25 | CDC73                     |
| 1104 | 2107 | 25 | CDK12                     |
| 1104 | 2107 | 25 | Cyclin dependent kinase-4 |
| 1104 | 2107 | 25 | CDK6                      |

|      |      |    |                                       |
|------|------|----|---------------------------------------|
| 1104 | 2107 | 25 | CDK8                                  |
| 1104 | 2107 | 25 | CDKN1B                                |
| 1104 | 2107 | 25 | CDKN2A                                |
| 1104 | 2107 | 25 | CDKN2B                                |
| 1104 | 2107 | 25 | CDKN2C                                |
| 1104 | 2107 | 25 | CCAT/enhancer binding protein (CEBPA) |
| 1104 | 2107 | 25 | CHEK1                                 |
| 1104 | 2107 | 25 | CHEK2                                 |
| 1104 | 2107 | 25 | CHUK                                  |
| 1104 | 2107 | 25 | CIC                                   |
| 1104 | 2107 | 25 | CRBN                                  |
| 1104 | 2107 | 25 | CREBBP                                |
| 1104 | 2107 | 25 | CRKL                                  |
| 1104 | 2107 | 25 | CRLF2                                 |
| 1104 | 2107 | 25 | CSF1R                                 |
| 1104 | 2107 | 25 | CTCF                                  |
| 1104 | 2107 | 25 | CTNNA1                                |
| 1104 | 2107 | 25 | CTNNB1                                |
| 1104 | 2107 | 25 | CUL4A                                 |
| 1104 | 2107 | 25 | CUL4B                                 |
| 1104 | 2107 | 25 | CYP17A1                               |
| 1104 | 2107 | 25 | DAXX                                  |
| 1104 | 2107 | 25 | DDR2                                  |
| 1104 | 2107 | 25 | DIS3                                  |
| 1104 | 2107 | 25 | DNMT3A                                |
| 1104 | 2107 | 25 | DOT1L                                 |
| 1104 | 2107 | 25 | Epidermal Growth Factor Receptor      |
| 1104 | 2107 | 25 | EMSY                                  |
| 1104 | 2107 | 25 | EP300                                 |
| 1104 | 2107 | 25 | EPHA3                                 |
| 1104 | 2107 | 25 | EPHA5                                 |
| 1104 | 2107 | 25 | EPHB1                                 |
| 1104 | 2107 | 25 | ERBB2                                 |
| 1104 | 2107 | 25 | ERBB3                                 |
| 1104 | 2107 | 25 | ERBB4                                 |
| 1104 | 2107 | 25 | ERG                                   |
| 1104 | 2107 | 25 | Estrogen receptor 1                   |
| 1104 | 2107 | 25 | ETV1                                  |
| 1104 | 2107 | 25 | ETV4                                  |



|      |      |    |                                   |
|------|------|----|-----------------------------------|
| 1104 | 2107 | 25 | ETV5                              |
| 1104 | 2107 | 25 | ETV6                              |
| 1104 | 2107 | 25 | EWSR1                             |
| 1104 | 2107 | 25 | EZH2                              |
| 1104 | 2107 | 25 | FAM123B(WTX)                      |
| 1104 | 2107 | 25 | FAM46C                            |
| 1104 | 2107 | 25 | FANCA                             |
| 1104 | 2107 | 25 | FANCC                             |
| 1104 | 2107 | 25 | FANCD2                            |
| 1104 | 2107 | 25 | FANCE                             |
| 1104 | 2107 | 25 | FANCF                             |
| 1104 | 2107 | 25 | FANCG                             |
| 1104 | 2107 | 25 | FANCI                             |
| 1104 | 2107 | 25 | FANCL                             |
| 1104 | 2107 | 25 | FANCM                             |
| 1104 | 2107 | 25 | FAT3                              |
| 1104 | 2107 | 25 | FBXW7                             |
| 1104 | 2107 | 25 | FGF10                             |
| 1104 | 2107 | 25 | FGF12                             |
| 1104 | 2107 | 25 | FGF14                             |
| 1104 | 2107 | 25 | Fibroblast growth factor 19       |
| 1104 | 2107 | 25 | Fibroblast growth factor 23       |
| 1104 | 2107 | 25 | Fibroblast growth factor 3        |
| 1104 | 2107 | 25 | FGF4                              |
| 1104 | 2107 | 25 | FGF6                              |
| 1104 | 2107 | 25 | FGF7                              |
| 1104 | 2107 | 25 | Fibroblast growth receptor 1      |
| 1104 | 2107 | 25 | Fibroblast growth receptor 2      |
| 1104 | 2107 | 25 | Fibroblast growth receptor 3      |
| 1104 | 2107 | 25 | Fibroblast growth receptor 4      |
| 1104 | 2107 | 25 | FLT1                              |
| 1104 | 2107 | 25 | Fms-like tyrosine kinase 3 (FLT3) |
| 1104 | 2107 | 25 | FLT4                              |
| 1104 | 2107 | 25 | FOXL2                             |
| 1104 | 2107 | 25 | GATA1                             |
| 1104 | 2107 | 25 | GATA2                             |
| 1104 | 2107 | 25 | GATA3                             |
| 1104 | 2107 | 25 | GNA11                             |
| 1104 | 2107 | 25 | GNA13                             |
| 1104 | 2107 | 25 | GNAQ                              |

|      |      |    |                                                  |
|------|------|----|--------------------------------------------------|
| 1104 | 2107 | 25 | GNAS                                             |
| 1104 | 2107 | 25 | GPR124                                           |
| 1104 | 2107 | 25 | GRIN2A                                           |
| 1104 | 2107 | 25 | GSK3B                                            |
| 1104 | 2107 | 25 | Hepatocyte growth factor                         |
| 1104 | 2107 | 25 | HLA-A                                            |
| 1104 | 2107 | 25 | HRAS                                             |
| 1104 | 2107 | 25 | IDH1                                             |
| 1104 | 2107 | 25 | IDH2                                             |
| 1104 | 2107 | 25 | Insulin-like growth factor 1                     |
| 1104 | 2107 | 25 | Insulin growth factor 1 receptor                 |
| 1104 | 2107 | 25 | Insulin-like growth factor 2, also somatomedin A |
| 1104 | 2107 | 25 | IKBKE                                            |
| 1104 | 2107 | 25 | IKZF1                                            |
| 1104 | 2107 | 25 | IL7R                                             |
| 1104 | 2107 | 25 | INHBA                                            |
| 1104 | 2107 | 25 | IRF4                                             |
| 1104 | 2107 | 25 | IRS2                                             |
| 1104 | 2107 | 25 | JAK1                                             |
| 1104 | 2107 | 25 | JAK2                                             |
| 1104 | 2107 | 25 | JAK3                                             |
| 1104 | 2107 | 25 | JUN                                              |
| 1104 | 2107 | 25 | KDM5A                                            |
| 1104 | 2107 | 25 | KDM5C                                            |
| 1104 | 2107 | 25 | KDM6A                                            |
| 1104 | 2107 | 25 | KDR                                              |
| 1104 | 2107 | 25 | KEAP1                                            |
| 1104 | 2107 | 25 | KIT                                              |
| 1104 | 2107 | 25 | KLHL6                                            |
| 1104 | 2107 | 25 | KRAS                                             |
| 1104 | 2107 | 25 | LMO1                                             |
| 1104 | 2107 | 25 | LRP1B                                            |
| 1104 | 2107 | 25 | MAP2K1                                           |
| 1104 | 2107 | 25 | MAP2K2                                           |
| 1104 | 2107 | 25 | MAP2K4                                           |
| 1104 | 2107 | 25 | MAP3K1                                           |
| 1104 | 2107 | 25 | MAP3K13                                          |
| 1104 | 2107 | 25 | MCL1                                             |
| 1104 | 2107 | 25 | MDM2                                             |
| 1104 | 2107 | 25 | MDM4                                             |

|      |      |    |                                                |
|------|------|----|------------------------------------------------|
| 1104 | 2107 | 25 | MED12                                          |
| 1104 | 2107 | 25 | MEF2B                                          |
| 1104 | 2107 | 25 | MEN1                                           |
| 1104 | 2107 | 25 | MET                                            |
| 1104 | 2107 | 25 | Microphthalmia associated transcription factor |
| 1104 | 2107 | 25 | MLH1                                           |
| 1104 | 2107 | 25 | MLL                                            |
| 1104 | 2107 | 25 | MLL2                                           |
| 1104 | 2107 | 25 | MPL                                            |
| 1104 | 2107 | 25 | MRE11A                                         |
| 1104 | 2107 | 25 | MSH2                                           |
| 1104 | 2107 | 25 | MSH6                                           |
| 1104 | 2107 | 25 | MTOR                                           |
| 1104 | 2107 | 25 | MUTYH                                          |
| 1104 | 2107 | 25 | MYC                                            |
| 1104 | 2107 | 25 | MYCL1                                          |
| 1104 | 2107 | 25 | MYCN                                           |
| 1104 | 2107 | 25 | MYD88                                          |
| 1104 | 2107 | 25 | MYST3                                          |
| 1104 | 2107 | 25 | NBN                                            |
| 1104 | 2107 | 25 | NCOR1                                          |
| 1104 | 2107 | 25 | NF1                                            |
| 1104 | 2107 | 25 | NF2                                            |
| 1104 | 2107 | 25 | NFE2L2                                         |
| 1104 | 2107 | 25 | NFKBIA                                         |
| 1104 | 2107 | 25 | NKX2-1                                         |
| 1104 | 2107 | 25 | NOTCH1                                         |
| 1104 | 2107 | 25 | NOTCH2                                         |
| 1104 | 2107 | 25 | NOTCH3                                         |
| 1104 | 2107 | 25 | NOTCH4                                         |
| 1104 | 2107 | 25 | Nucleophosmin (NPM1)                           |
| 1104 | 2107 | 25 | NRAS                                           |
| 1104 | 2107 | 25 | NSD1                                           |
| 1104 | 2107 | 25 | NTRK1                                          |
| 1104 | 2107 | 25 | NTRK2                                          |
| 1104 | 2107 | 25 | NTRK3                                          |
| 1104 | 2107 | 25 | NUP93                                          |
| 1104 | 2107 | 25 | PAK3                                           |
| 1104 | 2107 | 25 | PAK7                                           |
| 1104 | 2107 | 25 | PALB2                                          |

|      |      |    |                                |
|------|------|----|--------------------------------|
| 1104 | 2107 | 25 | PARP1                          |
| 1104 | 2107 | 25 | PARP2                          |
| 1104 | 2107 | 25 | PARP3                          |
| 1104 | 2107 | 25 | PARP4                          |
| 1104 | 2107 | 25 | PAX5                           |
| 1104 | 2107 | 25 | PBRM1                          |
| 1104 | 2107 | 25 | PDGFRA                         |
| 1104 | 2107 | 25 | PDGFRB                         |
| 1104 | 2107 | 25 | PDK1                           |
| 1104 | 2107 | 25 | PIK3C2G                        |
| 1104 | 2107 | 25 | PIK3C3                         |
| 1104 | 2107 | 25 | <i>PIK3CA</i>                  |
| 1104 | 2107 | 25 | PIK3CG                         |
| 1104 | 2107 | 25 | PIK3R1                         |
| 1104 | 2107 | 25 | PIK3R2                         |
| 1104 | 2107 | 25 | PMS2                           |
| 1104 | 2107 | 25 | PNRC1                          |
| 1104 | 2107 | 25 | PPP2R1A                        |
| 1104 | 2107 | 25 | PRDM1                          |
| 1104 | 2107 | 25 | PRKAR1A                        |
| 1104 | 2107 | 25 | PRKDC                          |
| 1104 | 2107 | 25 | PRSS8                          |
| 1104 | 2107 | 25 | PTCH1                          |
| 1104 | 2107 | 25 | Phosphatase and Tensin homolog |
| 1104 | 2107 | 25 | PTPN11                         |
| 1104 | 2107 | 25 | RAD50                          |
| 1104 | 2107 | 25 | RAD51                          |
| 1104 | 2107 | 25 | RAD51B                         |
| 1104 | 2107 | 25 | RAD51C                         |
| 1104 | 2107 | 25 | RAD51D                         |
| 1104 | 2107 | 25 | RAD52                          |
| 1104 | 2107 | 25 | RAD54L                         |
| 1104 | 2107 | 25 | RAF1                           |
| 1104 | 2107 | 25 | RARA                           |
| 1104 | 2107 | 25 | 13q14(RB1)V                    |
| 1104 | 2107 | 25 | REL                            |
| 1104 | 2107 | 25 | RET                            |
| 1104 | 2107 | 25 | RICTOR                         |
| 1104 | 2107 | 25 | RNF43                          |
| 1104 | 2107 | 25 | ROS1                           |

|      |      |    |                                   |
|------|------|----|-----------------------------------|
| 1104 | 2107 | 25 | RPA1                              |
| 1104 | 2107 | 25 | RPTOR                             |
| 1104 | 2107 | 25 | RUNX1                             |
| 1104 | 2107 | 25 | RUNX1T1                           |
| 1104 | 2107 | 25 | SETD2                             |
| 1104 | 2107 | 25 | SF3B1                             |
| 1104 | 2107 | 25 | SH2B3                             |
| 1104 | 2107 | 25 | SMAD2                             |
| 1104 | 2107 | 25 | SMAD4                             |
| 1104 | 2107 | 25 | SMARCA4                           |
| 1104 | 2107 | 25 | SMARCB1                           |
| 1104 | 2107 | 25 | SMARCD1                           |
| 1104 | 2107 | 25 | SMO                               |
| 1104 | 2107 | 25 | SOCS1                             |
| 1104 | 2107 | 25 | SOX10                             |
| 1104 | 2107 | 25 | SOX2                              |
| 1104 | 2107 | 25 | SPEN                              |
| 1104 | 2107 | 25 | SPOP                              |
| 1104 | 2107 | 25 | SRC                               |
| 1104 | 2107 | 25 | STAG2                             |
| 1104 | 2107 | 25 | STAT4                             |
| 1104 | 2107 | 25 | STK11                             |
| 1104 | 2107 | 25 | SUFU                              |
| 1104 | 2107 | 25 | SYK                               |
| 1104 | 2107 | 25 | TBX3                              |
| 1104 | 2107 | 25 | TET2                              |
| 1104 | 2107 | 25 | TGFBR2                            |
| 1104 | 2107 | 25 | TIPARP                            |
| 1104 | 2107 | 25 | TMPRSS2                           |
| 1104 | 2107 | 25 | TNFAIP3                           |
| 1104 | 2107 | 25 | TNFRSF14                          |
| 1104 | 2107 | 25 | TOP1                              |
| 1104 | 2107 | 25 | TP53                              |
| 1104 | 2107 | 25 | TRRAP                             |
| 1104 | 2107 | 25 | Tuberous sclerosis complex 1 gene |
| 1104 | 2107 | 25 | Tuberous sclerosis complex 2 gene |
| 1104 | 2107 | 25 | TSHR                              |
| 1104 | 2107 | 25 | Von Hippel-Lindau                 |
| 1104 | 2107 | 25 | WISP3                             |

|      |      |    |         |
|------|------|----|---------|
| 1104 | 2107 | 25 | WT1     |
| 1104 | 2107 | 25 | XPO1    |
| 1104 | 2107 | 25 | XRCC3   |
| 1104 | 2107 | 25 | ZNF217  |
| 1104 | 2107 | 25 | ZNF703  |
| 1106 | 2109 | 20 | ABL1    |
| 1106 | 2109 | 20 | AKT1    |
| 1106 | 2109 | 20 | AKT2    |
| 1106 | 2109 | 20 | AKT3    |
| 1106 | 2109 | 20 | ALK     |
| 1106 | 2109 | 20 | ALOX12B |
| 1106 | 2109 | 20 | APC     |
| 1106 | 2109 | 20 | APCDD1  |
| 1106 | 2109 | 20 | AR      |
| 1106 | 2109 | 20 | ARAF    |
| 1106 | 2109 | 20 | ARFRP1  |
| 1106 | 2109 | 20 | ARID1A  |
| 1106 | 2109 | 20 | ARID2   |
| 1106 | 2109 | 20 | ASXL1   |
| 1106 | 2109 | 20 | ATM     |
| 1106 | 2109 | 20 | ATR     |
| 1106 | 2109 | 20 | ATRX    |
| 1106 | 2109 | 20 | AURKA   |
| 1106 | 2109 | 20 | AURKB   |
| 1106 | 2109 | 20 | AXL     |
| 1106 | 2109 | 20 | BACH1   |
| 1106 | 2109 | 20 | BAP1    |
| 1106 | 2109 | 20 | BARD1   |
| 1106 | 2109 | 20 | BCL-2   |
| 1106 | 2109 | 20 | BCL2L2  |
| 1106 | 2109 | 20 | BCL6    |
| 1106 | 2109 | 20 | BCOR    |
| 1106 | 2109 | 20 | BCORL1  |
| 1106 | 2109 | 20 | BCR     |
| 1106 | 2109 | 20 | BLM     |
| 1106 | 2109 | 20 | BRAF    |
| 1106 | 2109 | 20 | BRCA1   |
| 1106 | 2109 | 20 | BRCA2   |
| 1106 | 2109 | 20 | BRIP1   |
| 1106 | 2109 | 20 | BTG1    |

|      |      |    |                                       |
|------|------|----|---------------------------------------|
| 1106 | 2109 | 20 | BTK                                   |
| 1106 | 2109 | 20 | C17orf39                              |
| 1106 | 2109 | 20 | CARD11                                |
| 1106 | 2109 | 20 | CASP8                                 |
| 1106 | 2109 | 20 | CBFB                                  |
| 1106 | 2109 | 20 | CBL                                   |
| 1106 | 2109 | 20 | CCND1                                 |
| 1106 | 2109 | 20 | CCND2                                 |
| 1106 | 2109 | 20 | CCND3                                 |
| 1106 | 2109 | 20 | CCNE1                                 |
| 1106 | 2109 | 20 | CD79A                                 |
| 1106 | 2109 | 20 | CD79B                                 |
| 1106 | 2109 | 20 | CDC73                                 |
| 1106 | 2109 | 20 | CDK12                                 |
| 1106 | 2109 | 20 | Cyclin dependent kinase-4             |
| 1106 | 2109 | 20 | CDK6                                  |
| 1106 | 2109 | 20 | CDK8                                  |
| 1106 | 2109 | 20 | CDKN1B                                |
| 1106 | 2109 | 20 | CDKN2A                                |
| 1106 | 2109 | 20 | CDKN2B                                |
| 1106 | 2109 | 20 | CDKN2C                                |
| 1106 | 2109 | 20 | CCAT/enhancer binding protein (CEBPA) |
| 1106 | 2109 | 20 | CHEK1                                 |
| 1106 | 2109 | 20 | CHEK2                                 |
| 1106 | 2109 | 20 | CHUK                                  |
| 1106 | 2109 | 20 | CIC                                   |
| 1106 | 2109 | 20 | CRBN                                  |
| 1106 | 2109 | 20 | CREBBP                                |
| 1106 | 2109 | 20 | CRKL                                  |
| 1106 | 2109 | 20 | CRLF2                                 |
| 1106 | 2109 | 20 | CSF1R                                 |
| 1106 | 2109 | 20 | CTCF                                  |
| 1106 | 2109 | 20 | CTNNA1                                |
| 1106 | 2109 | 20 | CTNNB1                                |
| 1106 | 2109 | 20 | CUL4A                                 |
| 1106 | 2109 | 20 | CUL4B                                 |
| 1106 | 2109 | 20 | CYP17A1                               |
| 1106 | 2109 | 20 | DAXX                                  |
| 1106 | 2109 | 20 | DDR2                                  |
| 1106 | 2109 | 20 | DIS3                                  |

|      |      |    |                                  |
|------|------|----|----------------------------------|
| 1106 | 2109 | 20 | DNMT3A                           |
| 1106 | 2109 | 20 | DOT1L                            |
| 1106 | 2109 | 20 | Epidermal Growth Factor Receptor |
| 1106 | 2109 | 20 | EMSY                             |
| 1106 | 2109 | 20 | EP300                            |
| 1106 | 2109 | 20 | EPHA3                            |
| 1106 | 2109 | 20 | EPHA5                            |
| 1106 | 2109 | 20 | EPHB1                            |
| 1106 | 2109 | 20 | ERBB2                            |
| 1106 | 2109 | 20 | ERBB3                            |
| 1106 | 2109 | 20 | ERBB4                            |
| 1106 | 2109 | 20 | ERG                              |
| 1106 | 2109 | 20 | Estrogen receptor 1              |
| 1106 | 2109 | 20 | ETV1                             |
| 1106 | 2109 | 20 | ETV4                             |
| 1106 | 2109 | 20 | ETV5                             |
| 1106 | 2109 | 20 | ETV6                             |
| 1106 | 2109 | 20 | EWSR1                            |
| 1106 | 2109 | 20 | EZH2                             |
| 1106 | 2109 | 20 | FAM123B(WTX)                     |
| 1106 | 2109 | 20 | FAM46C                           |
| 1106 | 2109 | 20 | FANCA                            |
| 1106 | 2109 | 20 | FANCC                            |
| 1106 | 2109 | 20 | FANCD2                           |
| 1106 | 2109 | 20 | FANCE                            |
| 1106 | 2109 | 20 | FANCF                            |
| 1106 | 2109 | 20 | FANCG                            |
| 1106 | 2109 | 20 | FANCI                            |
| 1106 | 2109 | 20 | FANCL                            |
| 1106 | 2109 | 20 | FANCM                            |
| 1106 | 2109 | 20 | FAT3                             |
| 1106 | 2109 | 20 | FBXW7                            |
| 1106 | 2109 | 20 | FGF10                            |
| 1106 | 2109 | 20 | FGF12                            |
| 1106 | 2109 | 20 | FGF14                            |
| 1106 | 2109 | 20 | Fibroblast growth factor 19      |
| 1106 | 2109 | 20 | Fibroblast growth factor 23      |
| 1106 | 2109 | 20 | Fibroblast growth factor 3       |
| 1106 | 2109 | 20 | FGF4                             |
| 1106 | 2109 | 20 | FGF6                             |



|      |      |    |                                                  |
|------|------|----|--------------------------------------------------|
| 1106 | 2109 | 20 | FGF7                                             |
| 1106 | 2109 | 20 | Fibroblast growth receptor 1                     |
| 1106 | 2109 | 20 | Fibroblast growth receptor 2                     |
| 1106 | 2109 | 20 | Fibroblast growth receptor 3                     |
| 1106 | 2109 | 20 | Fibroblast growth receptor 4                     |
| 1106 | 2109 | 20 | FLT1                                             |
| 1106 | 2109 | 20 | Fms-like tyrosine kinase 3 (FLT3)                |
| 1106 | 2109 | 20 | FLT4                                             |
| 1106 | 2109 | 20 | FOXL2                                            |
| 1106 | 2109 | 20 | GATA1                                            |
| 1106 | 2109 | 20 | GATA2                                            |
| 1106 | 2109 | 20 | GATA3                                            |
| 1106 | 2109 | 20 | GNA11                                            |
| 1106 | 2109 | 20 | GNA13                                            |
| 1106 | 2109 | 20 | GNAQ                                             |
| 1106 | 2109 | 20 | GNAS                                             |
| 1106 | 2109 | 20 | GPR124                                           |
| 1106 | 2109 | 20 | GRIN2A                                           |
| 1106 | 2109 | 20 | GSK3B                                            |
| 1106 | 2109 | 20 | Hepatocyte growth factor                         |
| 1106 | 2109 | 20 | HLA-A                                            |
| 1106 | 2109 | 20 | HRAS                                             |
| 1106 | 2109 | 20 | IDH1                                             |
| 1106 | 2109 | 20 | IDH2                                             |
| 1106 | 2109 | 20 | Insulin-like growth factor 1                     |
| 1106 | 2109 | 20 | Insulin growth factor 1 receptor                 |
| 1106 | 2109 | 20 | Insulin-like growth factor 2, also somatomedin A |
| 1106 | 2109 | 20 | IKBKE                                            |
| 1106 | 2109 | 20 | IKZF1                                            |
| 1106 | 2109 | 20 | IL7R                                             |
| 1106 | 2109 | 20 | INHBA                                            |
| 1106 | 2109 | 20 | IRF4                                             |
| 1106 | 2109 | 20 | IRS2                                             |
| 1106 | 2109 | 20 | JAK1                                             |
| 1106 | 2109 | 20 | JAK2                                             |
| 1106 | 2109 | 20 | JAK3                                             |
| 1106 | 2109 | 20 | JUN                                              |
| 1106 | 2109 | 20 | KDM5A                                            |
| 1106 | 2109 | 20 | KDM5C                                            |
| 1106 | 2109 | 20 | KDM6A                                            |

|      |      |    |                                                |
|------|------|----|------------------------------------------------|
| 1106 | 2109 | 20 | KDR                                            |
| 1106 | 2109 | 20 | KEAP1                                          |
| 1106 | 2109 | 20 | KIT                                            |
| 1106 | 2109 | 20 | KLHL6                                          |
| 1106 | 2109 | 20 | KRAS                                           |
| 1106 | 2109 | 20 | LMO1                                           |
| 1106 | 2109 | 20 | LRP1B                                          |
| 1106 | 2109 | 20 | MAP2K1                                         |
| 1106 | 2109 | 20 | MAP2K2                                         |
| 1106 | 2109 | 20 | MAP2K4                                         |
| 1106 | 2109 | 20 | MAP3K1                                         |
| 1106 | 2109 | 20 | MAP3K13                                        |
| 1106 | 2109 | 20 | MCL1                                           |
| 1106 | 2109 | 20 | MDM2                                           |
| 1106 | 2109 | 20 | MDM4                                           |
| 1106 | 2109 | 20 | MED12                                          |
| 1106 | 2109 | 20 | MEF2B                                          |
| 1106 | 2109 | 20 | MEN1                                           |
| 1106 | 2109 | 20 | MET                                            |
| 1106 | 2109 | 20 | Microphthalmia associated transcription factor |
| 1106 | 2109 | 20 | MLH1                                           |
| 1106 | 2109 | 20 | MLL                                            |
| 1106 | 2109 | 20 | MLL2                                           |
| 1106 | 2109 | 20 | MPL                                            |
| 1106 | 2109 | 20 | MRE11A                                         |
| 1106 | 2109 | 20 | MSH2                                           |
| 1106 | 2109 | 20 | MSH6                                           |
| 1106 | 2109 | 20 | MTOR                                           |
| 1106 | 2109 | 20 | MUTYH                                          |
| 1106 | 2109 | 20 | MYC                                            |
| 1106 | 2109 | 20 | MYCL1                                          |
| 1106 | 2109 | 20 | MYCN                                           |
| 1106 | 2109 | 20 | MYD88                                          |
| 1106 | 2109 | 20 | MYST3                                          |
| 1106 | 2109 | 20 | NBN                                            |
| 1106 | 2109 | 20 | NCOR1                                          |
| 1106 | 2109 | 20 | NF1                                            |
| 1106 | 2109 | 20 | NF2                                            |
| 1106 | 2109 | 20 | NFE2L2                                         |
| 1106 | 2109 | 20 | NFKBIA                                         |

|      |      |    |                                |
|------|------|----|--------------------------------|
| 1106 | 2109 | 20 | NKX2-1                         |
| 1106 | 2109 | 20 | NOTCH1                         |
| 1106 | 2109 | 20 | NOTCH2                         |
| 1106 | 2109 | 20 | NOTCH3                         |
| 1106 | 2109 | 20 | NOTCH4                         |
| 1106 | 2109 | 20 | Nucleophosmin (NPM1)           |
| 1106 | 2109 | 20 | NRAS                           |
| 1106 | 2109 | 20 | NSD1                           |
| 1106 | 2109 | 20 | NTRK1                          |
| 1106 | 2109 | 20 | NTRK2                          |
| 1106 | 2109 | 20 | NTRK3                          |
| 1106 | 2109 | 20 | NUP93                          |
| 1106 | 2109 | 20 | PAK3                           |
| 1106 | 2109 | 20 | PAK7                           |
| 1106 | 2109 | 20 | PALB2                          |
| 1106 | 2109 | 20 | PARP1                          |
| 1106 | 2109 | 20 | PARP2                          |
| 1106 | 2109 | 20 | PARP3                          |
| 1106 | 2109 | 20 | PARP4                          |
| 1106 | 2109 | 20 | PAX5                           |
| 1106 | 2109 | 20 | PBRM1                          |
| 1106 | 2109 | 20 | PDGFRA                         |
| 1106 | 2109 | 20 | PDGFRB                         |
| 1106 | 2109 | 20 | PDK1                           |
| 1106 | 2109 | 20 | PIK3C2G                        |
| 1106 | 2109 | 20 | PIK3C3                         |
| 1106 | 2109 | 20 | PIK3CG                         |
| 1106 | 2109 | 20 | PIK3R1                         |
| 1106 | 2109 | 20 | PIK3R2                         |
| 1106 | 2109 | 20 | PMS2                           |
| 1106 | 2109 | 20 | PNRC1                          |
| 1106 | 2109 | 20 | PPP2R1A                        |
| 1106 | 2109 | 20 | PRDM1                          |
| 1106 | 2109 | 20 | PRKAR1A                        |
| 1106 | 2109 | 20 | PRKDC                          |
| 1106 | 2109 | 20 | PRSS8                          |
| 1106 | 2109 | 20 | PTCH1                          |
| 1106 | 2109 | 20 | Phosphatase and Tensin homolog |
| 1106 | 2109 | 20 | PTPN11                         |
| 1106 | 2109 | 20 | RAD50                          |

|      |      |    |             |
|------|------|----|-------------|
| 1106 | 2109 | 20 | RAD51       |
| 1106 | 2109 | 20 | RAD51B      |
| 1106 | 2109 | 20 | RAD51C      |
| 1106 | 2109 | 20 | RAD51D      |
| 1106 | 2109 | 20 | RAD52       |
| 1106 | 2109 | 20 | RAD54L      |
| 1106 | 2109 | 20 | RAF1        |
| 1106 | 2109 | 20 | RARA        |
| 1106 | 2109 | 20 | 13q14(RB1)V |
| 1106 | 2109 | 20 | REL         |
| 1106 | 2109 | 20 | RET         |
| 1106 | 2109 | 20 | RICTOR      |
| 1106 | 2109 | 20 | RNF43       |
| 1106 | 2109 | 20 | ROS1        |
| 1106 | 2109 | 20 | RPA1        |
| 1106 | 2109 | 20 | RPTOR       |
| 1106 | 2109 | 20 | RUNX1       |
| 1106 | 2109 | 20 | RUNX1T1     |
| 1106 | 2109 | 20 | SETD2       |
| 1106 | 2109 | 20 | SF3B1       |
| 1106 | 2109 | 20 | SH2B3       |
| 1106 | 2109 | 20 | SMAD2       |
| 1106 | 2109 | 20 | SMAD4       |
| 1106 | 2109 | 20 | SMARCA4     |
| 1106 | 2109 | 20 | SMARCB1     |
| 1106 | 2109 | 20 | SMARCD1     |
| 1106 | 2109 | 20 | SMO         |
| 1106 | 2109 | 20 | SOCS1       |
| 1106 | 2109 | 20 | SOX10       |
| 1106 | 2109 | 20 | SOX2        |
| 1106 | 2109 | 20 | SPEN        |
| 1106 | 2109 | 20 | SPOP        |
| 1106 | 2109 | 20 | SRC         |
| 1106 | 2109 | 20 | STAG2       |
| 1106 | 2109 | 20 | STAT4       |
| 1106 | 2109 | 20 | STK11       |
| 1106 | 2109 | 20 | SUFU        |
| 1106 | 2109 | 20 | SYK         |
| 1106 | 2109 | 20 | TBX3        |
| 1106 | 2109 | 20 | TET2        |

|      |      |    |                                   |
|------|------|----|-----------------------------------|
| 1106 | 2109 | 20 | TGFBR2                            |
| 1106 | 2109 | 20 | TIPARP                            |
| 1106 | 2109 | 20 | TMPRSS2                           |
| 1106 | 2109 | 20 | TNFAIP3                           |
| 1106 | 2109 | 20 | TNFRSF14                          |
| 1106 | 2109 | 20 | TOP1                              |
| 1106 | 2109 | 20 | TP53                              |
| 1106 | 2109 | 20 | TRRAP                             |
| 1106 | 2109 | 20 | Tuberous sclerosis complex 1 gene |
| 1106 | 2109 | 20 | Tuberous sclerosis complex 2 gene |
| 1106 | 2109 | 20 | TSHR                              |
| 1106 | 2109 | 20 | Von Hippel-Lindau                 |
| 1106 | 2109 | 20 | WISP3                             |
| 1106 | 2109 | 20 | WT1                               |
| 1106 | 2109 | 20 | XPO1                              |
| 1106 | 2109 | 20 | XRCC3                             |
| 1106 | 2109 | 20 | ZNF217                            |
| 1106 | 2109 | 20 | ZNF703                            |
| 1107 | 2110 | 30 | ABL1                              |
| 1107 | 2110 | 30 | AKT1                              |
| 1107 | 2110 | 30 | AKT2                              |
| 1107 | 2110 | 30 | AKT3                              |
| 1107 | 2110 | 30 | ALK                               |
| 1107 | 2110 | 30 | ALOX12B                           |
| 1107 | 2110 | 30 | APC                               |
| 1107 | 2110 | 30 | APCDD1                            |
| 1107 | 2110 | 30 | AR                                |
| 1107 | 2110 | 30 | ARAF                              |
| 1107 | 2110 | 30 | ARFRP1                            |
| 1107 | 2110 | 30 | ARID1A                            |
| 1107 | 2110 | 30 | ARID2                             |
| 1107 | 2110 | 30 | ASXL1                             |
| 1107 | 2110 | 30 | ATM                               |
| 1107 | 2110 | 30 | ATR                               |
| 1107 | 2110 | 30 | ATRX                              |
| 1107 | 2110 | 30 | AURKA                             |
| 1107 | 2110 | 30 | AURKB                             |
| 1107 | 2110 | 30 | AXL                               |
| 1107 | 2110 | 30 | BACH1                             |

|      |      |    |                                       |
|------|------|----|---------------------------------------|
| 1107 | 2110 | 30 | BAP1                                  |
| 1107 | 2110 | 30 | BARD1                                 |
| 1107 | 2110 | 30 | BCL-2                                 |
| 1107 | 2110 | 30 | BCL2L2                                |
| 1107 | 2110 | 30 | BCL6                                  |
| 1107 | 2110 | 30 | BCOR                                  |
| 1107 | 2110 | 30 | BCORL1                                |
| 1107 | 2110 | 30 | BCR                                   |
| 1107 | 2110 | 30 | BLM                                   |
| 1107 | 2110 | 30 | BRAF                                  |
| 1107 | 2110 | 30 | BRCA1                                 |
| 1107 | 2110 | 30 | BRCA2                                 |
| 1107 | 2110 | 30 | BRIP1                                 |
| 1107 | 2110 | 30 | BTG1                                  |
| 1107 | 2110 | 30 | BTK                                   |
| 1107 | 2110 | 30 | C17orf39                              |
| 1107 | 2110 | 30 | CARD11                                |
| 1107 | 2110 | 30 | CASP8                                 |
| 1107 | 2110 | 30 | CBFB                                  |
| 1107 | 2110 | 30 | CBL                                   |
| 1107 | 2110 | 30 | CCND1                                 |
| 1107 | 2110 | 30 | CCND2                                 |
| 1107 | 2110 | 30 | CCND3                                 |
| 1107 | 2110 | 30 | CCNE1                                 |
| 1107 | 2110 | 30 | CD79A                                 |
| 1107 | 2110 | 30 | CD79B                                 |
| 1107 | 2110 | 30 | CDC73                                 |
| 1107 | 2110 | 30 | CDH1                                  |
| 1107 | 2110 | 30 | CDK12                                 |
| 1107 | 2110 | 30 | Cyclin dependent kinase-4             |
| 1107 | 2110 | 30 | CDK6                                  |
| 1107 | 2110 | 30 | CDK8                                  |
| 1107 | 2110 | 30 | CDKN1B                                |
| 1107 | 2110 | 30 | CDKN2A                                |
| 1107 | 2110 | 30 | CDKN2B                                |
| 1107 | 2110 | 30 | CDKN2C                                |
| 1107 | 2110 | 30 | CCAT/enhancer binding protein (CEBPA) |
| 1107 | 2110 | 30 | CHEK1                                 |
| 1107 | 2110 | 30 | CHEK2                                 |
| 1107 | 2110 | 30 | CHUK                                  |

|      |      |    |                                  |
|------|------|----|----------------------------------|
| 1107 | 2110 | 30 | CIC                              |
| 1107 | 2110 | 30 | CRBN                             |
| 1107 | 2110 | 30 | CREBBP                           |
| 1107 | 2110 | 30 | CRKL                             |
| 1107 | 2110 | 30 | CRLF2                            |
| 1107 | 2110 | 30 | CSF1R                            |
| 1107 | 2110 | 30 | CTCF                             |
| 1107 | 2110 | 30 | CTNNA1                           |
| 1107 | 2110 | 30 | CTNNB1                           |
| 1107 | 2110 | 30 | CUL4A                            |
| 1107 | 2110 | 30 | CUL4B                            |
| 1107 | 2110 | 30 | CYP17A1                          |
| 1107 | 2110 | 30 | DAXX                             |
| 1107 | 2110 | 30 | DDR2                             |
| 1107 | 2110 | 30 | DIS3                             |
| 1107 | 2110 | 30 | DNMT3A                           |
| 1107 | 2110 | 30 | DOT1L                            |
| 1107 | 2110 | 30 | Epidermal Growth Factor Receptor |
| 1107 | 2110 | 30 | EMSY                             |
| 1107 | 2110 | 30 | EP300                            |
| 1107 | 2110 | 30 | EPHA3                            |
| 1107 | 2110 | 30 | EPHA5                            |
| 1107 | 2110 | 30 | EPHB1                            |
| 1107 | 2110 | 30 | ERBB2                            |
| 1107 | 2110 | 30 | ERBB3                            |
| 1107 | 2110 | 30 | ERBB4                            |
| 1107 | 2110 | 30 | ERG                              |
| 1107 | 2110 | 30 | Estrogen receptor 1              |
| 1107 | 2110 | 30 | ETV1                             |
| 1107 | 2110 | 30 | ETV4                             |
| 1107 | 2110 | 30 | ETV5                             |
| 1107 | 2110 | 30 | ETV6                             |
| 1107 | 2110 | 30 | EWSR1                            |
| 1107 | 2110 | 30 | EZH2                             |
| 1107 | 2110 | 30 | FAM123B(WTX)                     |
| 1107 | 2110 | 30 | FAM46C                           |
| 1107 | 2110 | 30 | FANCA                            |
| 1107 | 2110 | 30 | FANCC                            |
| 1107 | 2110 | 30 | FANCD2                           |
| 1107 | 2110 | 30 | FANCE                            |

|      |      |    |                                   |
|------|------|----|-----------------------------------|
| 1107 | 2110 | 30 | FANCF                             |
| 1107 | 2110 | 30 | FANCG                             |
| 1107 | 2110 | 30 | FANCI                             |
| 1107 | 2110 | 30 | FANCL                             |
| 1107 | 2110 | 30 | FANCM                             |
| 1107 | 2110 | 30 | FAT3                              |
| 1107 | 2110 | 30 | FBXW7                             |
| 1107 | 2110 | 30 | FGF10                             |
| 1107 | 2110 | 30 | FGF12                             |
| 1107 | 2110 | 30 | FGF14                             |
| 1107 | 2110 | 30 | Fibroblast growth factor 19       |
| 1107 | 2110 | 30 | Fibroblast growth factor 23       |
| 1107 | 2110 | 30 | Fibroblast growth factor 3        |
| 1107 | 2110 | 30 | FGF4                              |
| 1107 | 2110 | 30 | FGF6                              |
| 1107 | 2110 | 30 | FGF7                              |
| 1107 | 2110 | 30 | Fibroblast growth receptor 1      |
| 1107 | 2110 | 30 | Fibroblast growth receptor 2      |
| 1107 | 2110 | 30 | Fibroblast growth receptor 3      |
| 1107 | 2110 | 30 | Fibroblast growth receptor 4      |
| 1107 | 2110 | 30 | FLT1                              |
| 1107 | 2110 | 30 | Fms-like tyrosine kinase 3 (FLT3) |
| 1107 | 2110 | 30 | FLT4                              |
| 1107 | 2110 | 30 | FOXL2                             |
| 1107 | 2110 | 30 | GATA1                             |
| 1107 | 2110 | 30 | GATA2                             |
| 1107 | 2110 | 30 | GATA3                             |
| 1107 | 2110 | 30 | GNA11                             |
| 1107 | 2110 | 30 | GNA13                             |
| 1107 | 2110 | 30 | GNAQ                              |
| 1107 | 2110 | 30 | GNAS                              |
| 1107 | 2110 | 30 | GPR124                            |
| 1107 | 2110 | 30 | GRIN2A                            |
| 1107 | 2110 | 30 | GSK3B                             |
| 1107 | 2110 | 30 | Hepatocyte growth factor          |
| 1107 | 2110 | 30 | HLA-A                             |
| 1107 | 2110 | 30 | HRAS                              |
| 1107 | 2110 | 30 | IDH1                              |
| 1107 | 2110 | 30 | IDH2                              |
| 1107 | 2110 | 30 | Insulin-like growth factor 1      |



|      |      |    |                                                  |
|------|------|----|--------------------------------------------------|
| 1107 | 2110 | 30 | Insulin growth factor 1 receptor                 |
| 1107 | 2110 | 30 | Insulin-like growth factor 2, also somatomedin A |
| 1107 | 2110 | 30 | IKBKE                                            |
| 1107 | 2110 | 30 | IKZF1                                            |
| 1107 | 2110 | 30 | IL7R                                             |
| 1107 | 2110 | 30 | INHBA                                            |
| 1107 | 2110 | 30 | IRF4                                             |
| 1107 | 2110 | 30 | IRS2                                             |
| 1107 | 2110 | 30 | JAK1                                             |
| 1107 | 2110 | 30 | JAK2                                             |
| 1107 | 2110 | 30 | JAK3                                             |
| 1107 | 2110 | 30 | JUN                                              |
| 1107 | 2110 | 30 | KDM5A                                            |
| 1107 | 2110 | 30 | KDM5C                                            |
| 1107 | 2110 | 30 | KDM6A                                            |
| 1107 | 2110 | 30 | KDR                                              |
| 1107 | 2110 | 30 | KEAP1                                            |
| 1107 | 2110 | 30 | KIT                                              |
| 1107 | 2110 | 30 | KLHL6                                            |
| 1107 | 2110 | 30 | KRAS                                             |
| 1107 | 2110 | 30 | LMO1                                             |
| 1107 | 2110 | 30 | LRP1B                                            |
| 1107 | 2110 | 30 | MAP2K1                                           |
| 1107 | 2110 | 30 | MAP2K2                                           |
| 1107 | 2110 | 30 | MAP2K4                                           |
| 1107 | 2110 | 30 | MAP3K1                                           |
| 1107 | 2110 | 30 | MAP3K13                                          |
| 1107 | 2110 | 30 | MCL1                                             |
| 1107 | 2110 | 30 | MDM2                                             |
| 1107 | 2110 | 30 | MDM4                                             |
| 1107 | 2110 | 30 | MED12                                            |
| 1107 | 2110 | 30 | MEF2B                                            |
| 1107 | 2110 | 30 | MEN1                                             |
| 1107 | 2110 | 30 | MET                                              |
| 1107 | 2110 | 30 | Microphthalmia associated transcription factor   |
| 1107 | 2110 | 30 | MLH1                                             |
| 1107 | 2110 | 30 | MLL                                              |
| 1107 | 2110 | 30 | MLL2                                             |
| 1107 | 2110 | 30 | MPL                                              |

|      |      |    |                      |
|------|------|----|----------------------|
| 1107 | 2110 | 30 | MRE11A               |
| 1107 | 2110 | 30 | MSH2                 |
| 1107 | 2110 | 30 | MSH6                 |
| 1107 | 2110 | 30 | MTOR                 |
| 1107 | 2110 | 30 | MUTYH                |
| 1107 | 2110 | 30 | MYC                  |
| 1107 | 2110 | 30 | MYCL1                |
| 1107 | 2110 | 30 | MYCN                 |
| 1107 | 2110 | 30 | MYD88                |
| 1107 | 2110 | 30 | MYST3                |
| 1107 | 2110 | 30 | NBN                  |
| 1107 | 2110 | 30 | NCOR1                |
| 1107 | 2110 | 30 | NF1                  |
| 1107 | 2110 | 30 | NF2                  |
| 1107 | 2110 | 30 | NFE2L2               |
| 1107 | 2110 | 30 | NFKBIA               |
| 1107 | 2110 | 30 | NKX2-1               |
| 1107 | 2110 | 30 | NOTCH1               |
| 1107 | 2110 | 30 | NOTCH2               |
| 1107 | 2110 | 30 | NOTCH3               |
| 1107 | 2110 | 30 | NOTCH4               |
| 1107 | 2110 | 30 | Nucleophosmin (NPM1) |
| 1107 | 2110 | 30 | NRAS                 |
| 1107 | 2110 | 30 | NSD1                 |
| 1107 | 2110 | 30 | NTRK1                |
| 1107 | 2110 | 30 | NTRK2                |
| 1107 | 2110 | 30 | NTRK3                |
| 1107 | 2110 | 30 | NUP93                |
| 1107 | 2110 | 30 | PAK3                 |
| 1107 | 2110 | 30 | PAK7                 |
| 1107 | 2110 | 30 | PALB2                |
| 1107 | 2110 | 30 | PARP1                |
| 1107 | 2110 | 30 | PARP2                |
| 1107 | 2110 | 30 | PARP3                |
| 1107 | 2110 | 30 | PARP4                |
| 1107 | 2110 | 30 | PAX5                 |
| 1107 | 2110 | 30 | PBRM1                |
| 1107 | 2110 | 30 | PDGFRA               |
| 1107 | 2110 | 30 | PDGFRB               |
| 1107 | 2110 | 30 | PKD1                 |

|      |      |    |                                |
|------|------|----|--------------------------------|
| 1107 | 2110 | 30 | PIK3C2G                        |
| 1107 | 2110 | 30 | PIK3C3                         |
| 1107 | 2110 | 30 | PIK3CG                         |
| 1107 | 2110 | 30 | PIK3R1                         |
| 1107 | 2110 | 30 | PIK3R2                         |
| 1107 | 2110 | 30 | PMS2                           |
| 1107 | 2110 | 30 | PNRC1                          |
| 1107 | 2110 | 30 | PPP2R1A                        |
| 1107 | 2110 | 30 | PRDM1                          |
| 1107 | 2110 | 30 | PRKAR1A                        |
| 1107 | 2110 | 30 | PRKDC                          |
| 1107 | 2110 | 30 | PRSS8                          |
| 1107 | 2110 | 30 | PTCH1                          |
| 1107 | 2110 | 30 | Phosphatase and Tensin homolog |
| 1107 | 2110 | 30 | PTPN11                         |
| 1107 | 2110 | 30 | RAD50                          |
| 1107 | 2110 | 30 | RAD51                          |
| 1107 | 2110 | 30 | RAD51B                         |
| 1107 | 2110 | 30 | RAD51C                         |
| 1107 | 2110 | 30 | RAD51D                         |
| 1107 | 2110 | 30 | RAD52                          |
| 1107 | 2110 | 30 | RAD54L                         |
| 1107 | 2110 | 30 | RAF1                           |
| 1107 | 2110 | 30 | RARA                           |
| 1107 | 2110 | 30 | 13q14(RB1)V                    |
| 1107 | 2110 | 30 | REL                            |
| 1107 | 2110 | 30 | RET                            |
| 1107 | 2110 | 30 | RICTOR                         |
| 1107 | 2110 | 30 | RNF43                          |
| 1107 | 2110 | 30 | ROS1                           |
| 1107 | 2110 | 30 | RPA1                           |
| 1107 | 2110 | 30 | RPTOR                          |
| 1107 | 2110 | 30 | RUNX1                          |
| 1107 | 2110 | 30 | RUNX1T1                        |
| 1107 | 2110 | 30 | SETD2                          |
| 1107 | 2110 | 30 | SF3B1                          |
| 1107 | 2110 | 30 | SH2B3                          |
| 1107 | 2110 | 30 | SMAD2                          |
| 1107 | 2110 | 30 | SMAD4                          |
| 1107 | 2110 | 30 | SMARCA4                        |

|      |      |    |                                   |
|------|------|----|-----------------------------------|
| 1107 | 2110 | 30 | SMARCB1                           |
| 1107 | 2110 | 30 | SMARCD1                           |
| 1107 | 2110 | 30 | SMO                               |
| 1107 | 2110 | 30 | SOCS1                             |
| 1107 | 2110 | 30 | SOX10                             |
| 1107 | 2110 | 30 | SOX2                              |
| 1107 | 2110 | 30 | SPEN                              |
| 1107 | 2110 | 30 | SPOP                              |
| 1107 | 2110 | 30 | SRC                               |
| 1107 | 2110 | 30 | STAG2                             |
| 1107 | 2110 | 30 | STAT4                             |
| 1107 | 2110 | 30 | STK11                             |
| 1107 | 2110 | 30 | SUFU                              |
| 1107 | 2110 | 30 | SYK                               |
| 1107 | 2110 | 30 | TBX3                              |
| 1107 | 2110 | 30 | TET2                              |
| 1107 | 2110 | 30 | TGFBR2                            |
| 1107 | 2110 | 30 | TIPARP                            |
| 1107 | 2110 | 30 | TMPRSS2                           |
| 1107 | 2110 | 30 | TNFAIP3                           |
| 1107 | 2110 | 30 | TNFRSF14                          |
| 1107 | 2110 | 30 | TOP1                              |
| 1107 | 2110 | 30 | TRRAP                             |
| 1107 | 2110 | 30 | Tuberous sclerosis complex 1 gene |
| 1107 | 2110 | 30 | Tuberous sclerosis complex 2 gene |
| 1107 | 2110 | 30 | TSHR                              |
| 1107 | 2110 | 30 | Von Hippel-Lindau                 |
| 1107 | 2110 | 30 | WISP3                             |
| 1107 | 2110 | 30 | WT1                               |
| 1107 | 2110 | 30 | XPO1                              |
| 1107 | 2110 | 30 | XRCC3                             |
| 1107 | 2110 | 30 | ZNF217                            |
| 1107 | 2110 | 30 | ZNF703                            |

ID, identification; NGS, next-generation sequencing.
